# Supplementary material for: Broad Transcriptomic Impact of Sorafenib and Its Relation to the Antitumoral Properties in Liver Cancer Cells
Source: Cancers (Basel). 2022 Feb 25;14(5):1204. doi: 10.3390/cancers14051204 (PMC8909169; doi:10.3390/cancers14051204)
Supplement: Supplementary file 1 [file cancers-14-01204-s001.zip]

Archive with 4 entries (4 files):
- cancers-1605103-supplementary figures.pdf
- Table S1.xlsx
- Table S2.xlsx
- Table S3.xlsx
