# Supplementary material for: Broad Transcriptomic Impact of Sorafenib and Its Relation to the Antitumoral Properties in Liver Cancer Cells
Source: Cancers (Basel). 2022 Feb 25;14(5):1204. doi: 10.3390/cancers14051204 (PMC8909169; doi:10.3390/cancers14051204)
Supplement: Supplementary file 1 [file cancers-14-01204-s001.zip › Table S2.xlsx]

## Sheet: HepG2_Upregulated
Gene name	LogFC	pValue	FDR	Biotype
INHBE	4.45279	1.84898e-33	3.913e-29	protein_coding
SLC44A2	3.96673	1.75456e-26	3.713e-22	protein_coding
ATF3	3.49269	1.969e-24	4.16661e-20	protein_coding
NUPR1	3.27431	2.17284e-23	4.59751e-19	protein_coding
PPP1R13B	2.33898	1.82342e-22	3.85799e-18	protein_coding
ARRDC3	2.69271	3.1711e-21	6.70879e-17	protein_coding
SMG1P3	3.06881	4.8565e-20	1.02739e-15	transcribed_unprocessed_pseudogene
BCL3	2.05732	2.19763e-19	4.64886e-15	protein_coding
TUFT1	2.3859	5.66008e-18	1.19728e-13	protein_coding
ADGRG1	2.51606	8.89908e-18	1.88233e-13	protein_coding
PIM1	2.78678	1.53986e-17	3.25681e-13	protein_coding
DUSP8	3.31479	2.40717e-17	5.09092e-13	protein_coding
NR1D1	3.37719	2.57824e-17	5.45247e-13	protein_coding
HAMP	2.00965	3.17021e-17	6.70373e-13	protein_coding
ERN1	2.05624	3.39859e-17	7.18633e-13	protein_coding
SERTAD2	1.74751	4.15969e-17	8.79525e-13	protein_coding
NR3C1	1.79344	1.85381e-16	3.91915e-12	protein_coding
AC079781.5	2.31666	2.38652e-16	5.04509e-12	lncRNA
CRTC3	1.90194	2.40738e-16	5.08896e-12	protein_coding
PPP1R15A	2.79958	4.50328e-16	9.51858e-12	protein_coding
AC022506.1	3.76707	5.7709e-16	1.21974e-11	protein_coding
ASNS	2.49644	6.61292e-16	1.39764e-11	protein_coding
SLC7A5P2	3.30075	1.29587e-15	2.73856e-11	transcribed_processed_pseudogene
DDIT3	3.21183	1.4325e-15	3.02716e-11	protein_coding
CLIP1	1.86218	2.03146e-15	4.29268e-11	protein_coding
CBX4	2.59726	2.12138e-15	4.48248e-11	protein_coding
BBC3	1.82226	3.46885e-15	7.32934e-11	protein_coding
DUSP1	2.73938	4.77392e-15	1.00859e-10	protein_coding
FGD4	2.15446	6.20563e-15	1.311e-10	protein_coding
GNA13	1.79475	8.51751e-15	1.79932e-10	protein_coding
ACVR1	2.25265	8.71392e-15	1.84073e-10	protein_coding
ALMS1-IT1	3.71061	1.33866e-14	2.82766e-10	lncRNA
TBX4	2.58566	1.43445e-14	3.02985e-10	protein_coding
AKNA	2.29698	3.23393e-14	6.82942e-10	protein_coding
AXIN2	2.01212	3.51333e-14	7.41909e-10	protein_coding
ELF3	2.04271	4.36137e-14	9.20947e-10	protein_coding
SLC25A25	2.53742	4.525e-14	9.55453e-10	protein_coding
MEF2B	2.29223	7.83775e-14	1.65478e-09	protein_coding
MEF2B	2.29223	7.83775e-14	1.65478e-09	protein_coding
DDIT4	2.084	8.32162e-14	1.75678e-09	protein_coding
NR1D2	1.88684	8.67315e-14	1.8309e-09	protein_coding
CDK5RAP2	1.43247	1.87337e-13	3.9543e-09	protein_coding
AL691482.3	2.00197	3.05476e-13	6.44677e-09	lncRNA
PALM2-AKAP2	1.57133	3.612e-13	7.6224e-09	protein_coding
SMAD7	1.88231	4.73674e-13	9.99498e-09	protein_coding
SIK3	1.61418	9.06628e-13	1.9128e-08	protein_coding
IGFALS	2.26221	1.09143e-12	2.30248e-08	protein_coding
SLC7A11	2.56134	1.48171e-12	3.12568e-08	protein_coding
GSE1	1.84915	1.5846e-12	3.3424e-08	protein_coding
AMOTL2	1.94644	1.68135e-12	3.54631e-08	protein_coding
TRIB3	2.19302	1.79627e-12	3.78852e-08	protein_coding
CEBPB	1.79687	2.50359e-12	5.27981e-08	protein_coding
AC004805.1	2.58576	2.53892e-12	5.35408e-08	protein_coding
LONRF3	2.32182	2.5875e-12	5.45626e-08	protein_coding
JAG1	1.93558	2.73135e-12	5.75932e-08	protein_coding
GPCPD1	2.18717	2.87958e-12	6.07159e-08	protein_coding
BCAR3	1.73584	2.95151e-12	6.22297e-08	protein_coding
BCAR3	1.73584	2.95151e-12	6.22297e-08	protein_coding
HIC2	1.8236	2.95374e-12	6.22707e-08	protein_coding
TIPARP	1.79065	3.03831e-12	6.40506e-08	protein_coding
SKIL	1.83598	3.22083e-12	6.78918e-08	protein_coding
ELMSAN1	2.23134	3.29198e-12	6.93883e-08	protein_coding
ZBTB10	1.56997	3.71557e-12	7.83131e-08	protein_coding
HCFC2	2.177	4.03807e-12	8.51064e-08	protein_coding
GADD45B	3.01303	5.7459e-12	1.21089e-07	protein_coding
SH3BP2	1.92028	8.34956e-12	1.7595e-07	protein_coding
KDM6B	2.02466	8.69498e-12	1.83221e-07	protein_coding
SDC4	1.97275	8.75915e-12	1.84564e-07	protein_coding
LRIG2	1.50729	1.15708e-11	2.43784e-07	protein_coding
STC2	2.34144	1.18663e-11	2.49998e-07	protein_coding
UHRF1BP1	1.55992	1.23403e-11	2.59974e-07	protein_coding
RAPH1	1.67403	1.28402e-11	2.70491e-07	protein_coding
PICALM	1.2298	1.46165e-11	3.07897e-07	protein_coding
SLC20A2	1.59084	1.53804e-11	3.23973e-07	protein_coding
LNX2	1.34442	2.11994e-11	4.46501e-07	protein_coding
TUBE1	1.75396	2.61859e-11	5.51501e-07	protein_coding
HRH3	3.35345	3.23069e-11	6.80382e-07	protein_coding
EPC1	1.2406	3.96939e-11	8.35913e-07	protein_coding
JDP2	2.57517	4.41536e-11	9.29787e-07	protein_coding
SLC43A1	1.34827	4.89086e-11	1.02982e-06	protein_coding
MYO7A	1.51665	5.63069e-11	1.18549e-06	protein_coding
GNAI1	1.74463	6.27471e-11	1.32101e-06	protein_coding
PPTC7	1.30003	7.39321e-11	1.55642e-06	protein_coding
CCPG1	1.52543	8.94428e-11	1.88259e-06	protein_coding
SIGIRR	2.03985	8.95192e-11	1.88411e-06	protein_coding
SAMD4A	1.67127	1.04836e-10	2.20638e-06	protein_coding
ELFN1	2.37885	1.06678e-10	2.24504e-06	protein_coding
TMEM268	1.89349	1.245e-10	2.61998e-06	protein_coding
PPFIBP1	1.59768	1.58418e-10	3.3336e-06	protein_coding
MAP3K2	1.29172	1.77548e-10	3.73578e-06	protein_coding
TCF12	1.49136	1.8838e-10	3.96352e-06	protein_coding
GLIS2	2.62289	1.89144e-10	3.9794e-06	protein_coding
MYO10	1.85289	2.1696e-10	4.56396e-06	protein_coding
RARA	1.678	2.36813e-10	4.98113e-06	protein_coding
SH2B3	1.80175	2.49106e-10	5.23921e-06	protein_coding
PER2	1.88458	2.58669e-10	5.44007e-06	protein_coding
AGO2	1.58981	2.71851e-10	5.71703e-06	protein_coding
CNKSR3	1.46577	3.33137e-10	7.00521e-06	protein_coding
ZNF460	2.62966	3.37692e-10	7.10065e-06	protein_coding
FLNB	1.2899	3.43388e-10	7.22008e-06	protein_coding
AARS	1.49356	3.53171e-10	7.42541e-06	protein_coding
ZEB1	1.72215	4.02167e-10	8.45517e-06	protein_coding
FZD5	1.49004	4.20351e-10	8.83704e-06	protein_coding
PHF3	1.61425	5.16798e-10	1.08616e-05	protein_coding
CCDC174	1.52786	6.13412e-10	1.28915e-05	protein_coding
SCN9A	1.43444	6.36108e-10	1.33672e-05	protein_coding
RAB3IL1	1.90749	7.13053e-10	1.4982e-05	protein_coding
XRN1	1.55284	7.2124e-10	1.51533e-05	protein_coding
SRF	1.24735	7.31582e-10	1.53698e-05	protein_coding
PDGFA	1.95691	9.1584e-10	1.92381e-05	protein_coding
GAB2	1.83909	9.94906e-10	2.0898e-05	protein_coding
LCA5	1.66816	9.9853e-10	2.09731e-05	protein_coding
USP4	1.39468	1.0572e-09	2.22043e-05	protein_coding
USP4	1.39468	1.0572e-09	2.22043e-05	protein_coding
LRIG3	2.22296	1.14971e-09	2.4144e-05	protein_coding
GADD45A	1.73311	1.21235e-09	2.54582e-05	protein_coding
TLK2	1.31604	1.24848e-09	2.62156e-05	protein_coding
MED13L	1.58311	1.26535e-09	2.65687e-05	protein_coding
RCHY1	1.23028	1.27107e-09	2.66873e-05	protein_coding
CCSER2	1.25967	1.28246e-09	2.69252e-05	protein_coding
OCRL	1.21252	1.34649e-09	2.82655e-05	protein_coding
ZFAND3	1.20131	1.68197e-09	3.53045e-05	protein_coding
ATXN7	1.50631	1.745e-09	3.66241e-05	protein_coding
IFRD1	1.83334	1.97069e-09	4.13568e-05	protein_coding
HMGN1P3	5.60614	2.20459e-09	4.62589e-05	processed_pseudogene
RAB33B	1.30356	2.48533e-09	5.21422e-05	protein_coding
NEURL3	2.71687	2.59436e-09	5.44271e-05	protein_coding
MTMR3	1.50384	2.88389e-09	6.04925e-05	protein_coding
PROSER2	1.64509	3.01304e-09	6.31986e-05	protein_coding
CREBRF	1.90564	3.34738e-09	7.02012e-05	protein_coding
CPEB4	1.94645	3.39644e-09	7.12267e-05	protein_coding
CRIM1	1.3513	4.02787e-09	8.44605e-05	protein_coding
ARNT	1.28881	4.15455e-09	8.71125e-05	protein_coding
SIK1B	1.70008	4.17674e-09	8.75736e-05	protein_coding
CERS4	1.29113	4.4057e-09	9.23654e-05	protein_coding
ZXDB	1.6397	4.66838e-09	9.78633e-05	protein_coding
CARS	1.17208	4.88467e-09	0.000102392	protein_coding
PLEKHM3	1.90016	4.90538e-09	0.000102822	protein_coding
GRPEL2	1.47333	5.34225e-09	0.000111968	protein_coding
UBAP1	1.31463	5.5799e-09	0.000116944	protein_coding
ACSL1	1.25943	5.69227e-09	0.000119293	protein_coding
GDF15	2.21831	5.95067e-09	0.000124702	protein_coding
JAK1	1.37609	6.69348e-09	0.000140222	protein_coding
CCN1	2.77863	6.98528e-09	0.000146314	protein_coding
REPS1	1.22622	7.84361e-09	0.000164269	protein_coding
OCLN	1.54257	8.37775e-09	0.000175447	protein_coding
CTH	1.71113	8.44284e-09	0.000176802	protein_coding
TRIM36	1.75615	8.74042e-09	0.000183024	protein_coding
JMY	1.72721	9.65801e-09	0.000202229	protein_coding
AJUBA	1.72954	9.92534e-09	0.000207817	protein_coding
SIRT1	1.50601	9.95038e-09	0.000208331	protein_coding
TRAPPC11	1.37441	1.00061e-08	0.000209487	protein_coding
AC055811.2	1.82787	1.0095e-08	0.000211338	protein_coding
ANGPTL8	2.05667	1.04075e-08	0.00021787	protein_coding
CAPN5	2.4457	1.12089e-08	0.000234625	protein_coding
CYP1A1	2.1574	1.16212e-08	0.000243243	protein_coding
AC097634.4	1.4788	1.1679e-08	0.000244442	protein_coding
JUN	1.90578	1.33842e-08	0.000280065	protein_coding
CEBPG	1.72303	1.3446e-08	0.000281345	protein_coding
CNNM4	1.34182	1.35512e-08	0.000283519	protein_coding
TUT7	1.36172	1.48123e-08	0.000309887	protein_coding
DNAAF4-CCPG1	1.41524	1.52105e-08	0.000318204	lncRNA
NFIL3	1.85102	1.52112e-08	0.000318204	protein_coding
BRAF	1.18784	1.52351e-08	0.000318687	protein_coding
CIDECP1	1.66609	1.54237e-08	0.000322618	transcribed_unprocessed_pseudogene
FGFR3	1.57993	1.57098e-08	0.00032857	protein_coding
THBS1	1.6983	1.57798e-08	0.000330018	protein_coding
DST	1.41998	1.60865e-08	0.0003364	protein_coding
KIAA1958	1.5146	1.61336e-08	0.00033737	protein_coding
MRTFA	1.68833	1.68138e-08	0.000351577	protein_coding
PPP3CC	1.33429	1.6989e-08	0.000355223	protein_coding
ABCA5	1.73022	1.76754e-08	0.000369539	protein_coding
PARD3B	1.52007	1.78523e-08	0.00037322	protein_coding
SIAH1	1.4634	1.8218e-08	0.000380848	protein_coding
TAF4	1.04796	1.82839e-08	0.000382206	protein_coding
SYDE2	2.13001	1.89731e-08	0.000396575	protein_coding
ERBIN	1.20838	1.9447e-08	0.000406442	protein_coding
DMXL1	1.34526	1.99589e-08	0.000417082	protein_coding
C16orf87	1.37588	2.01136e-08	0.000420294	protein_coding
ACTB	1.27791	2.18863e-08	0.000457271	protein_coding
NCK1	1.15617	2.30859e-08	0.000482286	protein_coding
JUNB	2.10922	2.36446e-08	0.000493935	protein_coding
CLK4	1.73728	2.38945e-08	0.000499107	protein_coding
ATP8B1	1.79913	2.45432e-08	0.000512608	protein_coding
SLC12A6	1.30737	2.5487e-08	0.000532271	protein_coding
TMEM56	1.20752	2.72384e-08	0.000568737	protein_coding
DVL3	1.20225	2.81602e-08	0.000587957	protein_coding
RHOU	1.26332	2.82169e-08	0.000589112	protein_coding
BRPF3	1.02055	2.87487e-08	0.000600186	protein_coding
FERMT2	1.32882	3.20914e-08	0.000669875	protein_coding
BCOR	1.13118	3.37028e-08	0.000703479	protein_coding
RHOT1	1.1907	3.59424e-08	0.000750118	protein_coding
SLC3A2	1.9849	3.68179e-08	0.000768315	protein_coding
SOCS6	1.59872	3.7211e-08	0.000776483	protein_coding
ARIH1	1.14383	3.73419e-08	0.000779176	protein_coding
PIM3	1.99825	3.77002e-08	0.000786616	protein_coding
AC067931.1	2.99847	3.9377e-08	0.000821562	TEC
TSKU	1.09984	3.9954e-08	0.000833561	protein_coding
PLEKHA7	1.20283	4.03469e-08	0.000841677	protein_coding
AC018638.5	2.13158	4.06618e-08	0.000848205	processed_pseudogene
SPIN1	1.3026	4.06927e-08	0.000848808	protein_coding
SAMD11	3.23	4.22583e-08	0.000881298	protein_coding
DENND5A	1.48698	4.31599e-08	0.000900056	protein_coding
ANKRD33B	3.50343	4.33663e-08	0.000904317	protein_coding
SLC7A1	1.30765	4.62643e-08	0.000964704	protein_coding
R3HDM2	1.25226	4.92569e-08	0.00102696	protein_coding
RCOR3	1.2639	4.99624e-08	0.00104162	protein_coding
AC026273.1	1.41057	5.28526e-08	0.00110177	transcribed_unprocessed_pseudogene
ZNF710	1.27399	5.32838e-08	0.0011107	protein_coding
THAP1	1.30621	5.80995e-08	0.00121097	protein_coding
CMIP	1.07109	6.70344e-08	0.00139693	protein_coding
GARS	1.50913	6.91545e-08	0.0014409	protein_coding
CNOT6L	0.936719	6.98646e-08	0.00145563	protein_coding
SARS	1.40601	7.30453e-08	0.00152183	protein_coding
ANKRD13A	1.00908	7.32924e-08	0.0015269	protein_coding
DLC1	1.62877	7.43804e-08	0.00154949	protein_coding
RNF19B	1.33626	7.50501e-08	0.00156337	protein_coding
AC012181.2	2.65989	7.71502e-08	0.00160688	lncRNA
SNX30	1.22826	7.92242e-08	0.00164992	protein_coding
COX10	1.34221	8.00211e-08	0.00166644	protein_coding
AC091959.3	1.11557	8.33128e-08	0.00173474	protein_coding
SCAF8	1.25883	8.42095e-08	0.00175333	protein_coding
LRRC1	1.12319	8.43333e-08	0.00175582	protein_coding
TLE1	1.1797	9.30892e-08	0.00193793	protein_coding
TNFAIP3	1.37469	9.69829e-08	0.00201889	protein_coding
STRN3	1.29899	1.00103e-07	0.00208375	protein_coding
PITPNM2	1.47875	1.03127e-07	0.0021466	protein_coding
NOS1AP	1.88505	1.0335e-07	0.00215113	protein_coding
BRPF1	1.16189	1.16468e-07	0.00242347	protein_coding
ADAMTSL2	1.53311	1.18601e-07	0.00246761	protein_coding
RUFY3	1.1711	1.19812e-07	0.00249268	protein_coding
MXD1	1.11887	1.28273e-07	0.00266834	protein_coding
ZFX	1.05219	1.37353e-07	0.00285694	protein_coding
SP3	1.31321	1.43085e-07	0.0029756	protein_coding
SMURF1	1.55777	1.45389e-07	0.00302336	protein_coding
YARS	1.33713	1.47263e-07	0.00306219	protein_coding
MFHAS1	1.09086	1.65067e-07	0.0034319	protein_coding
CASTOR2	2.43825	1.6735e-07	0.00347887	protein_coding
RASAL2	1.75838	1.73065e-07	0.00359716	protein_coding
ZNF579	1.15718	1.77435e-07	0.00368781	protein_coding
RPL39P5	1.50447	1.80207e-07	0.00374525	transcribed_processed_pseudogene
ZCCHC4	1.28646	1.84073e-07	0.00382522	protein_coding
ZFP36L2	1.26802	1.86214e-07	0.00386952	protein_coding
TUT4	1.16549	1.9604e-07	0.00407351	protein_coding
ZMIZ1	1.30098	1.96803e-07	0.00408917	protein_coding
SLC23A2	1.36053	2.02968e-07	0.00421665	protein_coding
APBB2	1.21041	2.13624e-07	0.00443762	protein_coding
HINT3	0.95157	2.15235e-07	0.00447086	protein_coding
LCOR	1.13884	2.2698e-07	0.00471438	protein_coding
NAGS	1.7514	2.76092e-07	0.00573305	protein_coding
CDHR2	1.08351	2.84227e-07	0.00590141	protein_coding
AMMECR1L	1.16005	2.86776e-07	0.00595347	protein_coding
CXXC5	1.2387	2.937e-07	0.00609662	protein_coding
STK17A	1.45818	2.9741e-07	0.00617305	protein_coding
MT-RNR2	1.65533	2.97539e-07	0.00617542	Mt_rRNA
OPTN	1.17211	3.0083e-07	0.00624343	protein_coding
FBXO30	1.35082	3.14266e-07	0.00652102	protein_coding
RNF144B	1.29784	3.22879e-07	0.00669878	protein_coding
TJP1	0.987369	3.28597e-07	0.00681708	protein_coding
SENP7	1.31385	3.32018e-07	0.00688738	protein_coding
NCOA2	1.11273	3.34369e-07	0.00693583	protein_coding
RAB6A	1.35343	3.39997e-07	0.00705223	protein_coding
ZBTB17	1.11632	3.51515e-07	0.00729043	protein_coding
DGAT2	1.04053	3.57431e-07	0.00741276	protein_coding
CCNB1IP1	1.10695	3.58902e-07	0.0074429	protein_coding
MAN2A2	0.936272	3.61487e-07	0.00749615	protein_coding
KDM7A	1.90343	3.7165e-07	0.00770654	protein_coding
SLC48A1	1.5855	3.73976e-07	0.0077544	protein_coding
ZNF821	1.43087	3.79607e-07	0.00787076	protein_coding
TIAM2	1.1495	3.86533e-07	0.00801321	protein_coding
MEF2D	1.40374	3.98488e-07	0.00825946	protein_coding
BACH1	1.09323	4.02052e-07	0.00833292	protein_coding
MTSS1	1.21941	4.12636e-07	0.00855105	protein_coding
COL4A3BP	1.21588	4.29671e-07	0.00890277	protein_coding
KANSL1	1.23659	4.3104e-07	0.00893071	protein_coding
AC119674.2	1.5039	4.34936e-07	0.009011	protein_coding
ATAD2B	1.51269	4.39404e-07	0.00910312	protein_coding
MTHFD2	1.3951	4.5042e-07	0.0093309	protein_coding
TBC1D12	1.04199	4.5112e-07	0.00934494	protein_coding
DNMT3B	1.02289	4.80418e-07	0.00995042	protein_coding
CPEB2	1.94909	5.01076e-07	0.0103773	protein_coding
SIAH2	1.59724	5.01412e-07	0.0103837	protein_coding
ALAS1	1.37601	5.0201e-07	0.0103956	protein_coding
AC073052.1	6.48746	5.23009e-07	0.0108294	processed_pseudogene
SAMD8	0.977692	5.2486e-07	0.0108672	protein_coding
ZMYM5	1.23496	5.25221e-07	0.0108742	protein_coding
RHBDF1	1.17585	5.2802e-07	0.0109316	protein_coding
TRMT11	1.33472	5.45169e-07	0.011285	protein_coding
PMAIP1	1.64441	5.48574e-07	0.0113549	protein_coding
NAV2	1.3407	5.82371e-07	0.0120539	protein_coding
AFF4	1.21895	5.85693e-07	0.0121215	protein_coding
RND1	2.08934	5.87693e-07	0.0121623	protein_coding
NRIP1	0.930294	5.89681e-07	0.0122029	protein_coding
TEAD1	0.976844	5.96872e-07	0.0123505	protein_coding
FLCN	1.57906	5.97896e-07	0.0123711	protein_coding
NFXL1	1.0399	5.99845e-07	0.0124108	protein_coding
CASZ1	1.45619	6.33459e-07	0.0131025	protein_coding
PRRC2B	1.14565	6.43845e-07	0.0133167	protein_coding
AC037198.1	2.61066	6.77202e-07	0.0140032	lncRNA
MAFF	1.44886	6.80931e-07	0.0140796	protein_coding
CREBBP	1.17241	6.98289e-07	0.0144371	protein_coding
LATS1	1.41892	7.03859e-07	0.0145509	protein_coding
RUSC2	1.52249	7.06103e-07	0.0145966	protein_coding
RCAN3	1.03914	7.19007e-07	0.0148626	protein_coding
TNKS	1.21254	7.38581e-07	0.0152657	protein_coding
PPFIBP2	1.27279	7.71296e-07	0.0159388	protein_coding
RIPOR1	1.41021	7.74728e-07	0.016009	protein_coding
UVRAG	1.1991	7.83431e-07	0.016188	protein_coding
ZFPM1	1.11282	7.96128e-07	0.0164496	protein_coding
RORA	1.56425	8.53948e-07	0.01764	protein_coding
RELB	1.39815	8.61871e-07	0.0178019	protein_coding
DNAJC27	1.44995	8.62779e-07	0.0178198	protein_coding
ZNF777	1.35294	8.70338e-07	0.0179751	protein_coding
FAM193A	1.02113	8.82973e-07	0.0182352	protein_coding
SLC30A1	1.29783	8.86419e-07	0.0183054	protein_coding
SHB	1.28929	8.91057e-07	0.0183994	protein_coding
ACBD5	1.1646	8.98164e-07	0.0185453	protein_coding
TINAGL1	1.61057	9.00344e-07	0.0185894	protein_coding
KCMF1	1.10947	9.37439e-07	0.0193525	protein_coding
SMAD9	1.28432	9.41054e-07	0.0194262	protein_coding
AC087588.2	3.33845	9.537e-07	0.0196863	lncRNA
JADE3	1.16187	9.72215e-07	0.0200665	protein_coding
BRD4	1.14682	9.83936e-07	0.0203075	protein_coding
PPFIA1	0.951446	9.91372e-07	0.0204599	protein_coding
B4GALT1	1.04105	9.92017e-07	0.0204723	protein_coding
SLC12A4	1.15517	1.05305e-06	0.0217276	protein_coding
PAWR	1.26472	1.12367e-06	0.0231812	protein_coding
ABHD2	1.07536	1.14158e-06	0.0235486	protein_coding
EPS15L1	1.22384	1.17535e-06	0.0242417	protein_coding
PRAG1	1.11103	1.17686e-06	0.0242716	protein_coding
CRTC2	1.13461	1.1859e-06	0.0244568	protein_coding
MDM4	1.38025	1.19516e-06	0.0246466	protein_coding
IRAK2	1.36673	1.20384e-06	0.0248244	protein_coding
PCNX1	0.974076	1.21209e-06	0.024992	protein_coding
SLC20A1	0.997694	1.22504e-06	0.0252579	protein_coding
TNKS2	0.823492	1.23421e-06	0.0254457	protein_coding
KMT5B	1.33967	1.24412e-06	0.0256488	protein_coding
AQP7	2.64777	1.27183e-06	0.0262175	protein_coding
AQP7	2.64777	1.27183e-06	0.0262175	protein_coding
SCYL2	1.07546	1.30215e-06	0.0268359	protein_coding
VEGFA	1.67667	1.36105e-06	0.0280471	protein_coding
FOXO1	1.10315	1.42523e-06	0.0293654	protein_coding
MT1B	3.27746	1.43366e-06	0.0295333	protein_coding
ZNF410	0.942665	1.4494e-06	0.0298561	protein_coding
KIF1B	0.917831	1.46487e-06	0.030172	protein_coding
AC129492.1	1.57117	1.48628e-06	0.0306115	protein_coding
NECTIN3	0.972975	1.48703e-06	0.0306254	protein_coding
FOXK1	1.43075	1.49188e-06	0.0307237	protein_coding
CHD2	1.15949	1.49189e-06	0.0307237	protein_coding
CYP19A1	1.68002	1.50199e-06	0.0309274	protein_coding
AL606834.1	1.91529	1.502e-06	0.0309274	lncRNA
SLC22A7	1.5077	1.52183e-06	0.0313314	protein_coding
DIP2C	1.12084	1.54215e-06	0.0317482	protein_coding
ADM2	1.26339	1.56559e-06	0.0322276	protein_coding
TRAPPC10	1.53882	1.59291e-06	0.0327868	protein_coding
CAMK2D	1.22458	1.59852e-06	0.0328992	protein_coding
SLC2A8	1.06299	1.60883e-06	0.0331097	protein_coding
PSPH	1.09219	1.62665e-06	0.0334748	protein_coding
FAM47E-STBD1	1.45088	1.63337e-06	0.0336114	protein_coding
MYO1E	1.09933	1.67292e-06	0.034422	protein_coding
SESN2	1.6998	1.77476e-06	0.0365069	protein_coding
CKAP5	1.06886	1.80402e-06	0.0371051	protein_coding
CLK3	1.08581	1.81635e-06	0.0373552	protein_coding
SETD2	1.14714	1.82043e-06	0.037437	protein_coding
TSC22D2	1.43687	1.82761e-06	0.037583	protein_coding
STBD1	1.46846	1.83815e-06	0.0377979	protein_coding
USP25	1.11355	1.85576e-06	0.0381582	protein_coding
INPP5F	0.986003	1.85864e-06	0.0382155	protein_coding
GATA2	1.09034	1.97419e-06	0.0405794	protein_coding
SDE2	1.00232	1.97843e-06	0.0406646	protein_coding
SIK2	0.998989	1.9871e-06	0.0408409	protein_coding
SLK	0.931089	2.03718e-06	0.0418682	protein_coding
RNF19A	1.1265	2.05184e-06	0.0421674	protein_coding
ENAH	1.0531	2.06182e-06	0.0423703	protein_coding
ZNF451	1.10532	2.06605e-06	0.0424552	protein_coding
GTF2IRD1	1.32471	2.13763e-06	0.0439197	protein_coding
REV1	0.980851	2.22612e-06	0.045729	protein_coding
ZYX	1.48946	2.25009e-06	0.0462169	protein_coding
ZNF592	1.17693	2.25402e-06	0.0462953	protein_coding
GATA4	1.07362	2.26571e-06	0.0465331	protein_coding
PXK	1.54344	2.30253e-06	0.047287	protein_coding
SLC25A36	1.1089	2.30313e-06	0.047297	protein_coding
MEX3C	1.18123	2.34683e-06	0.0481897	protein_coding
RFX3	1.22747	2.35556e-06	0.0483668	protein_coding
SYNE3	1.58421	2.38968e-06	0.0490648	protein_coding
SUSD6	1.15801	2.42141e-06	0.0497091	protein_coding
KPNA4	1.09756	2.45964e-06	0.0504914	protein_coding
NUAK2	1.97069	2.56776e-06	0.0527059	protein_coding
AL359736.1	2.03992	2.57399e-06	0.0528311	protein_coding
B4GALT5	1.29208	2.61344e-06	0.0536383	protein_coding
FAXDC2	1.30734	2.65901e-06	0.0545708	protein_coding
TAPT1	1.07889	2.79292e-06	0.0573136	protein_coding
ZNF34	1.53531	2.80069e-06	0.0574702	protein_coding
APOL6	1.25802	2.83421e-06	0.0581524	protein_coding
KIDINS220	0.951287	2.90046e-06	0.0594972	protein_coding
MKRN2	1.18261	2.90424e-06	0.0595717	protein_coding
OSGIN2	1.30811	2.91149e-06	0.0597176	protein_coding
ZNF433	1.54695	2.92171e-06	0.0599214	protein_coding
RNA5SP155	6.61076	2.94655e-06	0.0604279	rRNA_pseudogene
IFFO2	1.2808	2.97301e-06	0.0609675	protein_coding
AHCYL2	1.20029	3.02537e-06	0.0620322	protein_coding
ZFAND1	1.17003	3.02917e-06	0.0621071	protein_coding
C20orf194	1.40233	3.09908e-06	0.0635373	protein_coding
KDM6A	1.21581	3.13391e-06	0.0642483	protein_coding
CYP4F3	1.89989	3.14641e-06	0.0645014	protein_coding
LINC00511	1.0623	3.22866e-06	0.0661811	lncRNA
LINC00511	1.0623	3.22866e-06	0.0661811	lncRNA
ELF1	0.988551	3.25114e-06	0.0666354	protein_coding
RBM27	1.03374	3.25834e-06	0.0667797	protein_coding
ACAP2	0.957554	3.36435e-06	0.068939	protein_coding
HEATR6	1.29667	3.41281e-06	0.0699285	protein_coding
FAM107B	1.30182	3.48967e-06	0.0714998	protein_coding
PALMD	1.10515	3.53436e-06	0.0724084	protein_coding
AC005520.1	0.906432	3.56449e-06	0.0730185	protein_coding
MSL2	0.933925	3.56708e-06	0.0730681	protein_coding
NOCT	1.32121	3.61039e-06	0.0739481	protein_coding
CASKIN2	1.12918	3.71351e-06	0.076049	protein_coding
PI4KAP2	1.24032	3.74068e-06	0.0766016	transcribed_unitary_pseudogene
TTC17	1.23643	3.85514e-06	0.078934	protein_coding
WEE1	1.1977	3.88173e-06	0.0794746	protein_coding
EPHA1	1.20753	3.92204e-06	0.080288	protein_coding
SEC24B	1.23266	3.92989e-06	0.0804448	protein_coding
SH3RF2	1.11262	3.99766e-06	0.0818241	protein_coding
KIAA0355	1.14305	4.01591e-06	0.0821936	protein_coding
CHD6	0.995114	4.32671e-06	0.0885374	protein_coding
ZFP36L1	1.05576	4.42039e-06	0.0904457	protein_coding
TP53BP2	1.08512	4.57447e-06	0.0935845	protein_coding
GRAMD4	1.23956	4.62688e-06	0.0946383	protein_coding
NBPF1	0.975971	4.66153e-06	0.0953376	protein_coding
ATF7	0.9024	4.6691e-06	0.0954878	protein_coding
ATF7	0.9024	4.6691e-06	0.0954878	protein_coding
PPP2R2A	1.06807	4.92304e-06	0.100652	protein_coding
ZNF598	0.993306	4.92691e-06	0.100723	protein_coding
KLHDC2	0.826786	5.09044e-06	0.104049	protein_coding
EEA1	1.17203	5.115e-06	0.104546	protein_coding
AC019257.8	1.26007	5.2369e-06	0.107026	protein_coding
MAGI3	1.04513	5.3648e-06	0.109619	protein_coding
AKAP1	0.799516	5.37925e-06	0.109909	protein_coding
SH3BGRL2	1.12406	5.47171e-06	0.111787	protein_coding
RIPK2	1.21215	5.52752e-06	0.112922	protein_coding
CDK17	1.52744	5.5628e-06	0.113631	protein_coding
CSNK1G1	0.978534	5.76043e-06	0.117634	protein_coding
MAP3K1	1.02689	6.03012e-06	0.123111	protein_coding
GAB1	1.1772	6.095e-06	0.124429	protein_coding
TAF1A	1.26634	6.21987e-06	0.126935	protein_coding
ZNF805	1.22666	6.22889e-06	0.127113	protein_coding
FBXO42	0.987938	6.4048e-06	0.130664	protein_coding
VPS11	1.26166	6.43197e-06	0.131212	protein_coding
CCDC68	1.15637	6.46022e-06	0.131782	protein_coding
DIP2B	1.04566	6.5731e-06	0.134071	protein_coding
CNN2	0.954155	6.58468e-06	0.134301	protein_coding
RGL1	1.21755	6.58901e-06	0.134383	protein_coding
PPP1R15B	1.04951	6.75124e-06	0.137678	protein_coding
POGZ	1.20225	6.90163e-06	0.140724	protein_coding
SHANK2	1.11525	6.95084e-06	0.141721	protein_coding
KHDRBS3	1.08536	6.99452e-06	0.142604	protein_coding
RBM24	1.73395	7.18432e-06	0.146445	protein_coding
RAB3GAP1	0.886282	7.19219e-06	0.146598	protein_coding
OTUD1	1.33083	7.2491e-06	0.147751	protein_coding
VPS37A	1.06361	7.25508e-06	0.147866	protein_coding
RNU6-574P	4.19058	7.27231e-06	0.14821	snRNA
ATF7IP	1.07378	7.38197e-06	0.150437	protein_coding
MISP	2.032	7.49076e-06	0.152647	protein_coding
ALAD	1.16416	7.52907e-06	0.15342	protein_coding
KLF11	1.54396	7.53437e-06	0.15352	protein_coding
EIF1	0.944988	7.65165e-06	0.155902	protein_coding
VPS37D	1.41455	7.72016e-06	0.157291	protein_coding
LINC02246	1.58365	7.74551e-06	0.157791	lncRNA
MORC3	0.987254	7.79113e-06	0.158705	protein_coding
AC040169.3	3.73869	7.80561e-06	0.158993	lncRNA
NOTCH1	1.72802	7.81002e-06	0.159074	protein_coding
RRP8	0.805474	7.97038e-06	0.162333	protein_coding
TIMM23B	1.45005	8.09991e-06	0.164946	protein_coding
BIK	2.47241	8.19078e-06	0.166789	protein_coding
NFAT5	0.98964	8.19793e-06	0.166926	protein_coding
ZNF609	1.00682	8.36455e-06	0.170302	protein_coding
INPP5E	1.13671	8.51793e-06	0.1734	protein_coding
SERAC1	0.861002	8.58784e-06	0.174814	protein_coding
FURIN	1.42077	8.70383e-06	0.177166	protein_coding
WASL	0.966703	8.72222e-06	0.177532	protein_coding
UBR5	1.15063	8.78233e-06	0.178738	protein_coding
AP001033.2	3.06628	8.82416e-06	0.17958	lncRNA
PTPRK	1.03468	8.83424e-06	0.179768	protein_coding
TMPPE	1.33818	8.97544e-06	0.182623	protein_coding
ARHGEF2	1.56975	9.32297e-06	0.189667	protein_coding
USP31	0.999665	9.62583e-06	0.19577	protein_coding
TLK1	0.967722	9.64689e-06	0.196189	protein_coding
TAB2	1.08134	9.71442e-06	0.197552	protein_coding
UHRF2	1.25118	9.74536e-06	0.198172	protein_coding
MTRNR2L12	1.79145	9.75009e-06	0.198258	protein_coding
TRIO	1.33338	1.00971e-05	0.205283	protein_coding
BORCS8-MEF2B	1.09535	1.02907e-05	0.209199	protein_coding
RRN3	1.02077	1.04943e-05	0.213317	protein_coding
BMF	1.40443	1.08082e-05	0.219678	protein_coding
SNAPC3	0.964485	1.08715e-05	0.220953	protein_coding
PPM1A	1.02642	1.10547e-05	0.224653	protein_coding
RALGAPB	0.950899	1.10854e-05	0.225255	protein_coding
WWC2	0.850094	1.13646e-05	0.230906	protein_coding
THRB	1.23511	1.15349e-05	0.234354	protein_coding
COG5	0.845798	1.16057e-05	0.235781	protein_coding
JMJD1C	1.13071	1.16484e-05	0.236626	protein_coding
HSDL1	0.818226	1.16752e-05	0.237147	protein_coding
WWC1	1.46649	1.20246e-05	0.244208	protein_coding
HIVEP2	1.64545	1.23932e-05	0.251618	protein_coding
PDZD8	0.981052	1.24046e-05	0.251839	protein_coding
CHMP4C	1.02136	1.24776e-05	0.253308	protein_coding
RTTN	1.02764	1.25729e-05	0.255217	protein_coding
ZNF697	1.20863	1.29729e-05	0.263312	protein_coding
DLG5	1.14072	1.32706e-05	0.269341	protein_coding
RIOK3	1.0761	1.32935e-05	0.269791	protein_coding
RSRC2	1.48674	1.33406e-05	0.270734	protein_coding
GFOD1	1.06808	1.35797e-05	0.275558	protein_coding
THRA	1.03146	1.37962e-05	0.279939	protein_coding
SMOX	1.08297	1.38144e-05	0.280294	protein_coding
WASHC4	0.884007	1.38928e-05	0.281856	protein_coding
MAFB	2.68354	1.40024e-05	0.284066	protein_coding
KLF12	1.49559	1.40855e-05	0.285739	protein_coding
AFG1L	0.942893	1.41413e-05	0.286856	protein_coding
GTPBP2	0.918953	1.42521e-05	0.28909	protein_coding
TRIM33	1.13738	1.46206e-05	0.296505	protein_coding
LRRFIP2	0.934627	1.46338e-05	0.296759	protein_coding
SLC7A5	1.14916	1.51359e-05	0.306865	protein_coding
AL135905.2	1.06565	1.54945e-05	0.314089	protein_coding
FIP1L1	0.904252	1.5541e-05	0.315017	protein_coding
USP47	1.01097	1.55752e-05	0.315694	protein_coding
NFKBIL1	0.867214	1.57788e-05	0.319774	protein_coding
CSRNP2	1.10753	1.69092e-05	0.342613	protein_coding
ZFY	1.14182	1.71196e-05	0.346843	protein_coding
LINC00674	1.26172	1.7123e-05	0.346895	transcribed_unprocessed_pseudogene
CLK1	1.57167	1.72543e-05	0.349521	protein_coding
LRRC40	0.947046	1.72935e-05	0.350296	protein_coding
UAP1L1	0.839827	1.76877e-05	0.358176	protein_coding
YPEL2	1.4602	1.77993e-05	0.360418	protein_coding
PGLYRP2	2.1138	1.79013e-05	0.362465	protein_coding
ACTA1	1.57611	1.79185e-05	0.362796	protein_coding
HACD2	0.854424	1.7924e-05	0.362888	protein_coding
CXCL3	3.56302	1.81785e-05	0.368005	protein_coding
DAPK3	1.14556	1.82151e-05	0.368728	protein_coding
SEMA3B	1.14194	1.83244e-05	0.370922	protein_coding
LRRC70	4.77296	1.85067e-05	0.374593	protein_coding
UNC5B	1.72427	1.88354e-05	0.381153	protein_coding
KLC4	0.87363	1.89083e-05	0.38261	protein_coding
CBFA2T2	0.995508	1.94123e-05	0.392692	protein_coding
PTP4A1	1.05837	1.94303e-05	0.393036	protein_coding
ACOT2	1.06063	1.95541e-05	0.395482	protein_coding
PIK3CA	0.900399	2.01622e-05	0.40772	protein_coding
SWAP70	0.799315	2.07191e-05	0.41892	protein_coding
MARVELD2	0.878278	2.0758e-05	0.419686	protein_coding
FXR2	0.891398	2.14838e-05	0.434273	protein_coding
DDX19B	0.82893	2.1526e-05	0.435083	protein_coding
ERBB2	0.878778	2.17264e-05	0.439112	protein_coding
STAM	1.13034	2.21021e-05	0.446684	protein_coding
AC010186.2	1.4776	2.26061e-05	0.456778	transcribed_unprocessed_pseudogene
TMC7	1.36277	2.26141e-05	0.456917	protein_coding
ATAD1	0.871503	2.29626e-05	0.463914	protein_coding
PACSIN2	0.981465	2.31873e-05	0.468406	protein_coding
PRPF18	1.02458	2.34646e-05	0.473961	protein_coding
STAT5A	1.1523	2.35052e-05	0.474734	protein_coding
TOM1	0.936848	2.35818e-05	0.476258	protein_coding
FBXO25	0.77314	2.36894e-05	0.478384	protein_coding
MICAL3	0.991194	2.37039e-05	0.478653	protein_coding
CPLANE1	1.27793	2.39857e-05	0.484295	protein_coding
NHSL1	1.08485	2.40677e-05	0.485902	protein_coding
CDC73	0.871043	2.46336e-05	0.497278	protein_coding
BRD1	0.906256	2.49538e-05	0.503718	protein_coding
AC137834.1	2.01	2.53647e-05	0.511987	protein_coding
PYROXD1	0.986128	2.54045e-05	0.512764	protein_coding
CREB1	0.858638	2.54223e-05	0.513099	protein_coding
DYRK1A	0.96113	2.54502e-05	0.513636	protein_coding
MPP1	0.884919	2.57847e-05	0.52036	protein_coding
ATXN2L	1.10576	2.58573e-05	0.521801	protein_coding
DOCK7	0.923734	2.59182e-05	0.522977	protein_coding
PXDC1	1.18744	2.62805e-05	0.530235	protein_coding
KSR1	1.05859	2.68208e-05	0.54111	protein_coding
GRAMD1A	1.17847	2.8041e-05	0.565502	protein_coding
ARL8A	1.1018	2.88398e-05	0.581518	protein_coding
SPECC1L-ADORA2A	0.944857	2.90952e-05	0.586589	protein_coding
TMEM167B	0.939917	2.96509e-05	0.597704	protein_coding
TGIF1	1.27486	2.99493e-05	0.603628	protein_coding
RYBP	0.940928	3.00761e-05	0.606123	protein_coding
PTPRM	1.0856	3.01603e-05	0.607791	protein_coding
AC026461.2	2.77732	3.02705e-05	0.609982	lncRNA
PELI1	1.19508	3.05786e-05	0.616159	protein_coding
TNFRSF12A	1.79512	3.0738e-05	0.619341	protein_coding
NOTUM	1.2358	3.12511e-05	0.629647	protein_coding
CNST	0.716552	3.16654e-05	0.637963	protein_coding
BTBD11	1.0719	3.18555e-05	0.641762	protein_coding
DENND5B	0.850236	3.24208e-05	0.653051	protein_coding
PKD1	1.30007	3.29301e-05	0.663245	protein_coding
C2orf88	1.37598	3.30489e-05	0.665605	protein_coding
CLCN3	0.841463	3.3074e-05	0.666078	protein_coding
TOR3A	1.08751	3.31104e-05	0.666778	protein_coding
ZCCHC8	1.05048	3.34935e-05	0.674459	protein_coding
SESTD1	0.936368	3.40656e-05	0.685944	protein_coding
CYLD	0.8932	3.45439e-05	0.695472	protein_coding
SNX29	0.930651	3.63538e-05	0.73162	protein_coding
FOXO3	1.03267	3.65538e-05	0.735609	protein_coding
CLSTN3	0.894731	3.68859e-05	0.742107	protein_coding
EPB41L4B	1.05232	3.73336e-05	0.750965	protein_coding
SHOC2	1.01777	3.76192e-05	0.756636	protein_coding
RANBP10	1.00954	3.78671e-05	0.761545	protein_coding
KDM4A	0.847341	3.78894e-05	0.761955	protein_coding
RNF169	1.193	3.79532e-05	0.763201	protein_coding
FNBP4	1.09744	3.94147e-05	0.792315	protein_coding
STX3	1.34637	3.96464e-05	0.796864	protein_coding
TMEM131L	1.52957	3.97972e-05	0.799765	protein_coding
HUS1	1.13784	3.99517e-05	0.802829	protein_coding
MLLT10	0.920241	4.00978e-05	0.805726	protein_coding
AC019117.3	1.62102	4.13996e-05	0.831759	protein_coding
ELOCP19	2.97795	4.14186e-05	0.832099	processed_pseudogene
SRPK2	0.910398	4.14891e-05	0.833476	protein_coding
SH3RF1	1.70992	4.19177e-05	0.842001	protein_coding
STX16-NPEPL1	1.00945	4.26732e-05	0.857091	protein_coding
VCL	1.14192	4.28021e-05	0.859595	protein_coding
ZFAND2B	0.985319	4.28286e-05	0.860085	protein_coding
AC093884.1	1.15161	4.2988e-05	0.863243	protein_coding
ATP6V1H	0.812904	4.31036e-05	0.865521	protein_coding
PPDPF	1.01788	4.37117e-05	0.877687	protein_coding
ZFAND5	1.02246	4.40879e-05	0.885152	protein_coding
RPRD2	0.85723	4.43246e-05	0.889816	protein_coding
COBLL1	0.979354	4.45346e-05	0.893987	protein_coding
SGMS1	0.863041	4.4575e-05	0.894755	protein_coding
PIP5K1A	0.95263	4.46623e-05	0.896462	protein_coding
HPCAL1	0.80249	4.50087e-05	0.90328	protein_coding
KIF2A	1.00251	4.51522e-05	0.906068	protein_coding
ZNF827	1.15072	4.54338e-05	0.911675	protein_coding
MT1X	1.50698	4.62694e-05	0.928349	protein_coding
CISH	1.55509	4.64652e-05	0.93223	protein_coding
TAOK1	0.877829	4.65515e-05	0.933917	protein_coding
TBX15	2.31398	4.68175e-05	0.93916	protein_coding
STAT5B	0.82687	4.68754e-05	0.940274	protein_coding
FTO	0.866775	4.73914e-05	0.950578	protein_coding
RANBP9	0.967733	4.82206e-05	0.967113	protein_coding
KLHL24	1.36888	4.83468e-05	0.969596	protein_coding
PLEKHA5	0.888328	4.84455e-05	0.971477	protein_coding
TULP4	0.990132	4.85121e-05	0.972764	protein_coding
AC026461.1	1.51275	4.91467e-05	0.985342	lncRNA
VPS13B	1.15069	4.99737e-05	1	protein_coding
TRAPPC13	0.83223	5.13694e-05	1	protein_coding
STRIP1	1.06381	5.14869e-05	1	protein_coding
MOCS1	0.727196	5.16506e-05	1	protein_coding
ZFP1	1.09214	5.21832e-05	1	protein_coding
TBX3	1.05742	5.259e-05	1	protein_coding
DMD	0.833957	5.31867e-05	1	protein_coding
ARHGEF18	1.16282	5.35892e-05	1	protein_coding
EPHA2	1.50438	5.38191e-05	1	protein_coding
EPC2	1.06266	5.44655e-05	1	protein_coding
U2AF1L4	1.17942	5.4799e-05	1	protein_coding
PCK2	0.99375	5.50325e-05	1	protein_coding
ACOX3	0.839132	5.5479e-05	1	protein_coding
RNF14	0.86771	5.62915e-05	1	protein_coding
TLN2	0.802166	5.63991e-05	1	protein_coding
IPO8	0.763119	5.72566e-05	1	protein_coding
C6orf136	0.993636	5.76074e-05	1	protein_coding
CGRRF1	1.21054	5.76452e-05	1	protein_coding
FNBP1L	1.03171	5.89718e-05	1	protein_coding
AL162171.1	1.25272	5.91022e-05	1	protein_coding
MBNL1	0.827551	6.01176e-05	1	protein_coding
PLD6	1.03496	6.03168e-05	1	protein_coding
STIM1	0.712059	6.04368e-05	1	protein_coding
ATP11B	0.829687	6.1279e-05	1	protein_coding
RABGAP1L	0.952913	6.15161e-05	1	protein_coding
SLC25A16	0.92071	6.19465e-05	1	protein_coding
EREG	2.62396	6.20234e-05	1	protein_coding
KAT7	1.06703	6.24177e-05	1	protein_coding
LRP1	0.829544	6.2923e-05	1	protein_coding
PHGDH	0.971949	6.31291e-05	1	protein_coding
MSH3	0.991205	6.39523e-05	1	protein_coding
ZZEF1	0.772289	6.43575e-05	1	protein_coding
AKAP8L	1.00222	6.54091e-05	1	protein_coding
LINC01473	2.53531	6.60128e-05	1	lncRNA
FOXN2	1.31106	6.62804e-05	1	protein_coding
IL6ST	1.11515	6.64214e-05	1	protein_coding
BNIP1	1.13357	6.70824e-05	1	protein_coding
DAGLA	1.14839	6.79877e-05	1	protein_coding
GREB1	1.13848	6.83832e-05	1	protein_coding
PLPP3	1.10742	6.89318e-05	1	protein_coding
DSC2	0.723636	6.94648e-05	1	protein_coding
CDC14B	0.85426	6.94785e-05	1	protein_coding
NFKB2	1.02016	7.0222e-05	1	protein_coding
SYNJ2	0.812393	7.02811e-05	1	protein_coding
MTPAP	0.850753	7.04569e-05	1	protein_coding
EMD	1.07658	7.04835e-05	1	protein_coding
GCLC	0.815413	7.21441e-05	1	protein_coding
PLK3	1.31247	7.28423e-05	1	protein_coding
VPS39	0.674535	7.31492e-05	1	protein_coding
RGS14	1.1539	7.34298e-05	1	protein_coding
ZNF318	0.676976	7.51997e-05	1	protein_coding
RASD1	1.96618	7.60221e-05	1	protein_coding
GXYLT2	0.848023	7.73693e-05	1	protein_coding
RAP1A	0.873925	7.95197e-05	1	protein_coding
FOXJ3	0.793521	7.96806e-05	1	protein_coding
ZC3H3	0.93804	8.02079e-05	1	protein_coding
USP53	0.906235	8.03938e-05	1	protein_coding
ITPKC	0.985631	8.06109e-05	1	protein_coding
LAMB2	0.85523	8.1929e-05	1	protein_coding
PLEKHF2	1.04768	8.2003e-05	1	protein_coding
SLC35D1	0.810463	8.39662e-05	1	protein_coding
FEM1B	0.870877	8.4772e-05	1	protein_coding
ZNF16	1.10884	8.50415e-05	1	protein_coding
MTSS1L	1.35068	8.55568e-05	1	protein_coding
MYC	1.38295	8.6271e-05	1	protein_coding
PLXNC1	1.08326	8.63873e-05	1	protein_coding
MEGF6	1.51153	8.64316e-05	1	protein_coding
POLK	1.07869	8.6527e-05	1	protein_coding
CUX1	0.769515	8.66902e-05	1	protein_coding
UNC13D	1.04335	8.84233e-05	1	protein_coding
LRRC8D	1.03808	8.8432e-05	1	protein_coding
CSGALNACT2	0.933029	8.91159e-05	1	protein_coding
ZCCHC7	0.827205	8.96416e-05	1	protein_coding
TSC22D3	1.92735	8.98089e-05	1	protein_coding
DENND1B	1.1743	9.08537e-05	1	protein_coding
HSPA4L	0.91892	9.09938e-05	1	protein_coding
PATL1	0.959211	9.12712e-05	1	protein_coding
CD55	1.49137	9.13578e-05	1	protein_coding
RAB30	1.12454	9.13906e-05	1	protein_coding
ZNF354B	1.12649	9.17042e-05	1	protein_coding
NFATC2	1.07104	9.1941e-05	1	protein_coding
JUP	0.895103	9.27414e-05	1	protein_coding
MECP2	0.862806	9.32377e-05	1	protein_coding
UBL3	0.854827	9.46548e-05	1	protein_coding
OXR1	1.11998	9.51364e-05	1	protein_coding
KIAA1211	1.77216	9.60798e-05	1	protein_coding
PTBP3	0.879461	9.65605e-05	1	protein_coding
SENP6	0.706065	9.70155e-05	1	protein_coding
C9orf72	1.38183	9.74841e-05	1	protein_coding
ABCC6P1	1.11628	9.75686e-05	1	transcribed_unprocessed_pseudogene
RP9	1.19244	9.75979e-05	1	protein_coding
AC058822.1	1.20101	9.86867e-05	1	protein_coding
ZBTB43	1.15065	9.87975e-05	1	protein_coding
MAB21L4	0.960164	0.000100198	1	protein_coding
MAFK	1.44393	0.000100591	1	protein_coding
MSANTD3-TMEFF1	0.9198	0.000101635	1	protein_coding
FLNA	1.01733	0.000103507	1	protein_coding
ADCY9	0.911911	0.000103755	1	protein_coding
MINDY3	1.01901	0.000104086	1	protein_coding
CELSR1	1.44877	0.00010414	1	protein_coding
NUDT4	0.953749	0.000104235	1	protein_coding
LMO7	0.813441	0.000104706	1	protein_coding
STK3	0.891082	0.000104834	1	protein_coding
IVNS1ABP	0.815161	0.000106112	1	protein_coding
ZBTB38	0.950527	0.000106165	1	protein_coding
GRB7	1.0321	0.00010667	1	protein_coding
NEDD4	1.04327	0.00010686	1	protein_coding
KLHL12	0.842086	0.000108325	1	protein_coding
CHST15	1.35042	0.000108711	1	protein_coding
PLEKHM2	0.956524	0.000109417	1	protein_coding
INTS7	0.869534	0.000111399	1	protein_coding
NFE2L2	1.07944	0.00011242	1	protein_coding
LINC01572	1.65497	0.000114897	1	lncRNA
SBNO2	1.05427	0.000115337	1	protein_coding
SPG11	0.786228	0.000116541	1	protein_coding
PCGF1	1.29098	0.000116628	1	protein_coding
PRKCZ	0.915336	0.000116946	1	protein_coding
FER	0.81986	0.000116947	1	protein_coding
MED13	0.644321	0.000117016	1	protein_coding
UBR2	0.73524	0.000117154	1	protein_coding
ACVR2A	0.938364	0.000119045	1	protein_coding
YY1AP1	0.885121	0.000119837	1	protein_coding
SLC38A3	1.11096	0.000122003	1	protein_coding
NSD3	0.786633	0.000122511	1	protein_coding
CRY2	0.859738	0.000123421	1	protein_coding
ULK1	0.937761	0.000127946	1	protein_coding
ALPG	6.23647	0.00012812	1	protein_coding
TET3	1.0725	0.000130339	1	protein_coding
KDM5B	0.716308	0.000130808	1	protein_coding
YAF2	0.849044	0.000130896	1	protein_coding
WDFY1	0.960774	0.000131301	1	protein_coding
NEXN	1.39834	0.000132255	1	protein_coding
PATJ	0.945582	0.000132534	1	protein_coding
ARHGEF3	0.731629	0.00013287	1	protein_coding
TARS	1.17365	0.000134086	1	protein_coding
PPP1R21	0.749849	0.000135238	1	protein_coding
SUCO	0.850639	0.000135861	1	protein_coding
AC012181.1	2.8244	0.000135953	1	lncRNA
THAP3	0.866483	0.000136411	1	protein_coding
SMIM32	2.1717	0.000136632	1	protein_coding
AL009179.1	1.51795	0.000137093	1	lncRNA
ARHGAP35	0.849097	0.000137523	1	protein_coding
NFYC	0.922818	0.0001378	1	protein_coding
AC108010.1	2.93848	0.000138472	1	lncRNA
MTMR10	0.899174	0.00013876	1	protein_coding
ARHGAP27	0.901405	0.000139316	1	protein_coding
VLDLR	2.12999	0.000139804	1	protein_coding
CPQ	0.823432	0.00014069	1	protein_coding
ZNF343	0.914793	0.000142239	1	protein_coding
AHCTF1	0.927644	0.000144621	1	protein_coding
AC139256.2	1.13169	0.000145532	1	lncRNA
AC039056.2	4.32395	0.000146235	1	lncRNA
BAIAP2L2	0.966234	0.000147647	1	protein_coding
CDKAL1	0.998464	0.000148361	1	protein_coding
NAPB	0.954818	0.000149719	1	protein_coding
COQ10B	0.989236	0.000149931	1	protein_coding
MON2	0.818623	0.000151778	1	protein_coding
MIA2	0.817634	0.000153516	1	protein_coding
TMTC3	0.726926	0.000155677	1	protein_coding
BICRAL	0.937482	0.000155928	1	protein_coding
RRAGC	0.876637	0.000156355	1	protein_coding
CMTM8	0.98661	0.000157538	1	protein_coding
PKD1P6	1.53602	0.000158121	1	transcribed_unprocessed_pseudogene
EXOC6B	0.779778	0.000158508	1	protein_coding
SAT2	0.991966	0.000160177	1	protein_coding
CREB5	1.84858	0.00016199	1	protein_coding
NT5DC4	2.18293	0.000162301	1	protein_coding
JUND	1.03927	0.000163337	1	protein_coding
SRFBP1	1.27859	0.000164844	1	protein_coding
ZNF276	0.856079	0.000164924	1	protein_coding
PLEKHH3	1.01384	0.000166753	1	protein_coding
ARID1B	0.896	0.00016772	1	protein_coding
SEC14L1	1.1343	0.000171626	1	protein_coding
FBXL3	0.742674	0.000172902	1	protein_coding
FRS3	0.885175	0.000173152	1	protein_coding
RBM33	1.01981	0.000173385	1	protein_coding
SPTBN1	1.03512	0.000175237	1	protein_coding
KDM3B	0.748796	0.00017562	1	protein_coding
TMEFF1	0.907759	0.000176869	1	protein_coding
AC118549.1	0.830743	0.000177383	1	protein_coding
AF127577.4	1.18721	0.00017747	1	lncRNA
PLK2	0.917706	0.000177649	1	protein_coding
WDR26	0.756393	0.000178891	1	protein_coding
NBAS	0.767946	0.000182518	1	protein_coding
EML2	1.2838	0.000182667	1	protein_coding
PPL	1.0036	0.000184974	1	protein_coding
AL157392.5	1.00256	0.00018744	1	protein_coding
MAST1	1.29546	0.00018756	1	protein_coding
RNF38	0.921255	0.000188103	1	protein_coding
PARGP1	1.83133	0.000189346	1	transcribed_unprocessed_pseudogene
PCIF1	1.10827	0.000190033	1	protein_coding
SCARB2	0.787451	0.000190739	1	protein_coding
ZNF362	0.955794	0.000191344	1	protein_coding
TMEM182	0.966888	0.000191496	1	protein_coding
FCHSD2	0.97724	0.000191896	1	protein_coding
MTMR6	0.823964	0.000191987	1	protein_coding
PMS2	0.976924	0.00019224	1	protein_coding
MOSPD2	0.910861	0.000192515	1	protein_coding
DGCR11	1.40529	0.000192779	1	lncRNA
DENND4C	0.799536	0.000193556	1	protein_coding
SMARCD3	1.56501	0.000195131	1	protein_coding
RAD52	0.974054	0.000195812	1	protein_coding
HECTD4	1.11707	0.00020163	1	protein_coding
CCNH	0.798633	0.000204915	1	protein_coding
ADAMTS6	1.92968	0.00020538	1	protein_coding
SPIN3	1.29469	0.000206551	1	protein_coding
PDLIM5	0.69672	0.000206692	1	protein_coding
CDKN2AIP	0.896473	0.000206856	1	protein_coding
HIVEP1	0.954021	0.00020772	1	protein_coding
SNHG17	1.3802	0.00020892	1	lncRNA
LHFPL2	0.720435	0.000209964	1	protein_coding
MCPH1	0.75286	0.000211134	1	protein_coding
PDS5A	0.671709	0.000211493	1	protein_coding
KMT2B	0.864641	0.000211606	1	protein_coding
AL137129.1	1.16033	0.000211695	1	lncRNA
KLF10	1.00284	0.000212838	1	protein_coding
CEP57L1	0.873459	0.000216534	1	protein_coding
TMEM87A	0.726615	0.000216732	1	protein_coding
LAMC1	0.86299	0.000217408	1	protein_coding
RIPK4	0.862405	0.000218278	1	protein_coding
PLXNB3	1.13081	0.000218602	1	protein_coding
LACTB	0.654306	0.000218693	1	protein_coding
ABHD6	1.00093	0.000221016	1	protein_coding
TNFAIP8L3	0.950204	0.000221188	1	protein_coding
MAFG	1.36105	0.00022164	1	protein_coding
AAK1	0.918696	0.000222996	1	protein_coding
BTG1	0.806774	0.000223241	1	protein_coding
SYBU	1.26273	0.000223974	1	protein_coding
CTC1	0.989264	0.000225654	1	protein_coding
FLVCR2	1.01277	0.000225665	1	protein_coding
TUBG2	0.992921	0.000225763	1	protein_coding
THAP9	1.17579	0.000226204	1	protein_coding
EPS8	1.02849	0.000228044	1	protein_coding
METRNL	1.52983	0.00022844	1	protein_coding
TYW1	0.860347	0.000231963	1	protein_coding
ALDH3B1	1.10217	0.000232908	1	protein_coding
EPS15	0.745641	0.000233536	1	protein_coding
EAF1	0.913223	0.000234631	1	protein_coding
SECISBP2L	0.870654	0.000236002	1	protein_coding
NPHP3-ACAD11	0.730464	0.000238415	1	protein_coding
FUT1	4.55163	0.000238491	1	protein_coding
OGA	0.862485	0.00023936	1	protein_coding
MGRN1	1.06811	0.000239544	1	protein_coding
SLC6A12	1.42125	0.000244294	1	protein_coding
CBL	1.18498	0.00024677	1	protein_coding
ESCO1	0.82094	0.000247587	1	protein_coding
ZBTB11	0.867684	0.000247615	1	protein_coding
HIF1A	0.949955	0.000247671	1	protein_coding
PLXNB2	0.973176	0.000248256	1	protein_coding
ZNF703	1.0664	0.000249799	1	protein_coding
MT-ND4L	1.25229	0.000253103	1	protein_coding
SIK1	1.7686	0.00025314	1	protein_coding
HERPUD2	0.84833	0.000259066	1	protein_coding
TBC1D9	0.887826	0.000260196	1	protein_coding
GPD1L	0.922119	0.000260484	1	protein_coding
SNX18	0.952146	0.000261208	1	protein_coding
MTX3	0.859905	0.000266938	1	protein_coding
THAP6	0.749723	0.00027186	1	protein_coding
USP18	1.08081	0.000271888	1	protein_coding
IFNGR1	1.2049	0.000271936	1	protein_coding
LINC01881	1.63283	0.000272703	1	transcribed_unprocessed_pseudogene
PHC3	0.979926	0.000272789	1	protein_coding
TMOD3	0.683996	0.000274633	1	protein_coding
TMOD3	0.683996	0.000274633	1	protein_coding
ZNF507	0.985416	0.000275112	1	protein_coding
KLHDC7B	3.89924	0.000275726	1	protein_coding
QKI	0.762916	0.000277531	1	protein_coding
FOSL2	1.14269	0.000277548	1	protein_coding
PIP4K2C	0.949263	0.000281723	1	protein_coding
GNAQ	0.712708	0.000284671	1	protein_coding
CNNM2	0.935328	0.000286671	1	protein_coding
FOXP1	0.658646	0.000290158	1	protein_coding
PHYHIP	1.51443	0.000290459	1	protein_coding
MED23	1.01752	0.00029617	1	protein_coding
NODAL	3.47616	0.00029626	1	protein_coding
FOXJ2	0.827734	0.000296369	1	protein_coding
ATRN	0.754505	0.000299914	1	protein_coding
FRK	0.801064	0.000300206	1	protein_coding
EPB41L5	0.994861	0.000303196	1	protein_coding
PRKCE	1.30408	0.000304038	1	protein_coding
CEPT1	0.800757	0.000304152	1	protein_coding
PPM1B	0.735618	0.000306538	1	protein_coding
CRAMP1	0.966205	0.00030846	1	protein_coding
CNTNAP1	1.09643	0.00030872	1	protein_coding
C5orf66	0.919448	0.000310481	1	lncRNA
CEP350	0.904193	0.000310694	1	protein_coding
GATAD2B	0.942586	0.000311278	1	protein_coding
GCFC2	0.632886	0.000312288	1	protein_coding
NFKBIA	1.00586	0.000312859	1	protein_coding
SBF2	0.852779	0.000313617	1	protein_coding
ZBTB2	1.03368	0.00031469	1	protein_coding
ALKBH8	0.925214	0.00031679	1	protein_coding
CFLAR	0.71352	0.00031864	1	protein_coding
CSNK1G3	0.750699	0.000320044	1	protein_coding
MRPS30	0.933503	0.000320568	1	protein_coding
TRAF3IP2	1.04228	0.000320569	1	protein_coding
TRAK1	0.605045	0.000322091	1	protein_coding
TTLL4	0.871252	0.000323538	1	protein_coding
KDM5D	1.11571	0.000326631	1	protein_coding
FOXN3	0.918616	0.00032843	1	protein_coding
ISL2	1.0421	0.000329519	1	protein_coding
LLGL2	0.881219	0.000329644	1	protein_coding
KLHL21	0.78705	0.00032994	1	protein_coding
HSPA13	0.786851	0.000332113	1	protein_coding
FBXW4	0.682052	0.000333207	1	protein_coding
NXN	0.704485	0.000334912	1	protein_coding
SLC25A38	0.651578	0.000340151	1	protein_coding
SPTAN1	0.747417	0.000340268	1	protein_coding
RBPMS	0.716802	0.000341726	1	protein_coding
RFFL	0.930905	0.000342138	1	protein_coding
WARS2	0.842948	0.000346857	1	protein_coding
VPS28	0.645605	0.000351032	1	protein_coding
GRASP	1.14288	0.000352313	1	protein_coding
CTIF	0.997083	0.000355727	1	protein_coding
AC092821.3	1.3142	0.000356458	1	lncRNA
NECAP1	0.733931	0.000358999	1	protein_coding
PDGFC	0.818263	0.000359177	1	protein_coding
MUS81	0.643951	0.000362005	1	protein_coding
PRDM11	0.85824	0.000362739	1	protein_coding
EFNA2	0.688143	0.000363314	1	protein_coding
MBNL2	1.02389	0.000365098	1	protein_coding
GCC1	0.854404	0.000366792	1	protein_coding
TTBK1	1.46557	0.000370393	1	protein_coding
GALT	0.844237	0.0003707	1	protein_coding
EIF3CL	1.81441	0.000382219	1	protein_coding
HEATR5B	1.2176	0.000383671	1	protein_coding
TBC1D8	1.15348	0.000384229	1	protein_coding
AL353743.1	1.38952	0.000385062	1	transcribed_unprocessed_pseudogene
PARD3	0.736407	0.000385106	1	protein_coding
ATXN1	0.794532	0.000389528	1	protein_coding
TENT4B	0.923801	0.000389889	1	protein_coding
ZNF628	1.03145	0.000396112	1	protein_coding
AP001429.1	2.82958	0.000397818	1	lncRNA
UGP2	0.955733	0.000398495	1	protein_coding
ZFP36	1.48325	0.000401553	1	protein_coding
BIRC3	1.47107	0.000408655	1	protein_coding
CEP170	0.926019	0.00041133	1	protein_coding
CEP170	0.926019	0.00041133	1	protein_coding
GDAP2	0.810957	0.00041621	1	protein_coding
ANKRD50	1.09026	0.000417402	1	protein_coding
TANC1	0.988408	0.000417772	1	protein_coding
NCBP3	0.683789	0.000419223	1	protein_coding
AC007950.1	0.826365	0.000420203	1	protein_coding
TXNL4B	0.618189	0.000422681	1	protein_coding
TACC1	0.966844	0.000425378	1	protein_coding
UHRF1BP1L	0.80089	0.000431982	1	protein_coding
GRB10	1.57291	0.000437227	1	protein_coding
ELMO2	0.866395	0.000437666	1	protein_coding
ZC3H7A	0.868824	0.000440465	1	protein_coding
FGD6	1.18513	0.00044068	1	protein_coding
PHF21A	0.687588	0.00044358	1	protein_coding
RSC1A1	1.03851	0.000443845	1	protein_coding
CHD3	1.18612	0.000444643	1	protein_coding
HES4	0.913609	0.000448454	1	protein_coding
WHRN	1.10346	0.000449031	1	protein_coding
ACOT11	0.997611	0.000450075	1	protein_coding
SPOPL	0.905538	0.000451135	1	protein_coding
USP36	0.747569	0.000451244	1	protein_coding
SH3GLB1	0.975024	0.000451943	1	protein_coding
FNIP1	0.799008	0.000458068	1	protein_coding
PALLD	0.898756	0.000459856	1	protein_coding
AC036108.2	2.61705	0.000459996	1	lncRNA
STK38L	0.729525	0.000461902	1	protein_coding
CAMTA2	0.810707	0.000462202	1	protein_coding
ARFGEF2	0.627955	0.000466875	1	protein_coding
DGKK	0.780214	0.000467651	1	protein_coding
JAK2	1.07352	0.000467819	1	protein_coding
NIPBL	0.909846	0.000470197	1	protein_coding
MFSD2B	0.733259	0.000470784	1	protein_coding
CDH2	0.71119	0.000472426	1	protein_coding
ACTG1	1.07099	0.000475827	1	protein_coding
STAM2	0.677849	0.000475937	1	protein_coding
KRAS	0.748689	0.000482753	1	protein_coding
TCEA1	0.960624	0.000486626	1	protein_coding
WHAMMP3	1.67213	0.000490243	1	transcribed_unprocessed_pseudogene
PMP22	0.834509	0.000492234	1	protein_coding
TSC1	0.74074	0.000493652	1	protein_coding
ZNF148	0.685141	0.000496114	1	protein_coding
CASC3	0.790782	0.000499393	1	protein_coding
CNTRL	0.712472	0.000499903	1	protein_coding
ITFG2	1.12267	0.000502608	1	protein_coding
BAMBI	0.879117	0.00050473	1	protein_coding
DR1	0.810659	0.000505026	1	protein_coding
PAPOLG	0.825255	0.000508738	1	protein_coding
CCDC85C	0.669954	0.000509015	1	protein_coding
STX7	0.889088	0.000510989	1	protein_coding
NOM1	0.783998	0.000511918	1	protein_coding
MICU1	0.925176	0.000526324	1	protein_coding
STEAP2	0.888629	0.000528426	1	protein_coding
BICRA	0.936637	0.000528541	1	protein_coding
MIR6758	3.36234	0.000529302	1	miRNA
NRP2	1.2744	0.000530641	1	protein_coding
ARL5B	0.67702	0.000531478	1	protein_coding
PLEC	1.08369	0.000532235	1	protein_coding
LATS2	0.831077	0.000532828	1	protein_coding
AC002996.1	0.820299	0.000538013	1	protein_coding
GDAP1	0.865495	0.000548289	1	protein_coding
INAVA	0.960595	0.000551502	1	protein_coding
RABGAP1	0.854373	0.000557991	1	protein_coding
RABGAP1	0.854373	0.000557991	1	protein_coding
DPF2	0.846099	0.000558539	1	protein_coding
BRAP	0.972743	0.000562494	1	protein_coding
SPECC1	1.02666	0.000569903	1	protein_coding
AC108488.1	0.882156	0.00057469	1	lncRNA
CFAP97	0.705406	0.000581692	1	protein_coding
LIFR	1.06597	0.000581998	1	protein_coding
KMT2C	0.905284	0.000585245	1	protein_coding
SLC11A2	0.665897	0.000586124	1	protein_coding
AC006511.5	1.37435	0.000588456	1	lncRNA
VWA8	0.847618	0.000591641	1	protein_coding
ADARB1	0.730186	0.000595516	1	protein_coding
AC010542.3	1.22983	0.000595666	1	protein_coding
FRRS1	1.31675	0.0005979	1	protein_coding
SPAG1	0.914653	0.000598959	1	protein_coding
MYO5B	0.748445	0.00060256	1	protein_coding
STX17	0.716281	0.000606263	1	protein_coding
SBDSP1	1.22437	0.000609555	1	transcribed_unprocessed_pseudogene
NCOA7	0.691813	0.000609816	1	protein_coding
SLC30A2	5.83909	0.000610128	1	protein_coding
ATOH8	1.90759	0.000612564	1	protein_coding
RAPGEF2	0.928502	0.000613394	1	protein_coding
EXT1	0.939741	0.000614657	1	protein_coding
PTCH1	1.2383	0.000615352	1	protein_coding
MAP4K2	1.0028	0.000617663	1	protein_coding
XPO7	0.767808	0.000617813	1	protein_coding
USP12	0.895596	0.000619755	1	protein_coding
ARFGEF1	0.680116	0.000627308	1	protein_coding
ARHGAP29	1.00209	0.000631072	1	protein_coding
TRIM35	0.782471	0.00063336	1	protein_coding
TTBK2	0.89363	0.000638283	1	protein_coding
MSL1	0.803724	0.000642197	1	protein_coding
SERF1B	4.6153	0.000647806	1	protein_coding
SERF1B	4.6153	0.000647806	1	protein_coding
PI4KAP1	1.45144	0.000653205	1	transcribed_unprocessed_pseudogene
MTM1	0.810589	0.000653725	1	protein_coding
WFIKKN1	0.926637	0.000653863	1	protein_coding
CLASP1	0.866378	0.000655247	1	protein_coding
SLC25A33	0.976026	0.000656548	1	protein_coding
FZR1	0.804256	0.000656987	1	protein_coding
KCTD9	0.680629	0.000660385	1	protein_coding
FBXL5	0.79954	0.000661501	1	protein_coding
CYP2W1	0.723711	0.000665452	1	protein_coding
KIAA1109	0.887981	0.00066572	1	protein_coding
USP9Y	0.70026	0.000668493	1	protein_coding
USP9Y	0.70026	0.000668493	1	protein_coding
SLC2A14	0.982289	0.0006713	1	protein_coding
PTK2	0.623318	0.000677063	1	protein_coding
IGF2R	0.756418	0.000678136	1	protein_coding
SLC12A7	0.684883	0.00068077	1	protein_coding
PTPN12	0.865483	0.000684551	1	protein_coding
KDM5C	0.827994	0.000684689	1	protein_coding
PTCH2	1.50711	0.000686578	1	protein_coding
ATF2	0.844314	0.000690652	1	protein_coding
USP54	0.982133	0.000699077	1	protein_coding
ZNF277	0.893316	0.000701901	1	protein_coding
ARHGAP21	0.795415	0.000708429	1	protein_coding
RCL1	0.80264	0.000708793	1	protein_coding
ARHGEF28	0.664579	0.000715068	1	protein_coding
BCL6	1.1118	0.000716388	1	protein_coding
AC005632.2	1.9261	0.000717171	1	lncRNA
ARHGAP42	1.48669	0.000720059	1	protein_coding
SPSB1	1.36303	0.00072041	1	protein_coding
IPMK	0.988132	0.000722452	1	protein_coding
AL162231.3	1.01294	0.000729662	1	protein_coding
APLP1	1.09735	0.000730131	1	protein_coding
PABPC1L	1.19583	0.000734018	1	protein_coding
SLCO2B1	0.834828	0.000734713	1	protein_coding
KLHL20	0.86799	0.000735475	1	protein_coding
DUSP10	1.09938	0.000740979	1	protein_coding
ZNF721	0.604477	0.000745344	1	protein_coding
ZNRF3	0.76129	0.000745816	1	protein_coding
MYH9	0.958728	0.000750894	1	protein_coding
MB21D2	1.53341	0.00075573	1	protein_coding
KAT6A	0.977298	0.000758812	1	protein_coding
FBXL4	0.650525	0.000759333	1	protein_coding
NMD3	0.809619	0.000763442	1	protein_coding
PLEKHA2	1.07998	0.000767474	1	protein_coding
BTG3	0.675428	0.000774041	1	protein_coding
GIT2	0.919454	0.000780366	1	protein_coding
WDFY3	0.747976	0.000781431	1	protein_coding
SLAIN2	0.655969	0.00078463	1	protein_coding
KMT5A	0.733423	0.000786917	1	protein_coding
ACTN1	0.874352	0.000792644	1	protein_coding
ZNF44	0.843203	0.000794973	1	protein_coding
EFL1	0.729654	0.000795352	1	protein_coding
TENT5B	1.93017	0.000807401	1	protein_coding
STON2	1.26271	0.000807932	1	protein_coding
RIT1	0.906776	0.000810855	1	protein_coding
SMTN	0.85752	0.000816458	1	protein_coding
LRCH1	1.10833	0.000817585	1	protein_coding
RSF1	0.755377	0.000822175	1	protein_coding
PUM2	0.698169	0.000824153	1	protein_coding
ACOX1	0.856731	0.000824596	1	protein_coding
CDC37L1	1.01195	0.000829907	1	protein_coding
CCDC93	0.879325	0.000830652	1	protein_coding
MIA3	0.782666	0.000835249	1	protein_coding
NELFA	0.721343	0.000842565	1	protein_coding
CERS2	0.882887	0.000850625	1	protein_coding
YES1	0.671877	0.00085074	1	protein_coding
ANO9	0.916138	0.00085461	1	protein_coding
RLIM	0.841131	0.000859239	1	protein_coding
SERPINE1	1.54372	0.000861374	1	protein_coding
SKA1	0.671125	0.000861442	1	protein_coding
FRY	1.60883	0.000874695	1	protein_coding
OSGIN1	1.14087	0.000881439	1	protein_coding
ZRSR2	0.986549	0.000895208	1	protein_coding
MORN4	0.943655	0.000896068	1	protein_coding
CCDC130	0.931697	0.00089753	1	protein_coding
RHOBTB3	0.621873	0.000900807	1	protein_coding
TLK2P1	1.48704	0.000902423	1	processed_pseudogene
NKX2-5	1.02847	0.000927263	1	protein_coding
SETD4	0.788844	0.000931771	1	protein_coding
MTHFD1L	0.987971	0.000935439	1	protein_coding
CRLF3	0.875489	0.000937735	1	protein_coding
DTNA	0.983805	0.000939833	1	protein_coding
PPARGC1A	1.24234	0.00094316	1	protein_coding
PHIP	0.899485	0.000944092	1	protein_coding
TET2	1.18673	0.000949708	1	protein_coding
KLF3	0.839735	0.000950485	1	protein_coding
NCOR2	0.680364	0.000954405	1	protein_coding
SMARCA2	0.78933	0.000955755	1	protein_coding
ALDH1L1	0.96009	0.000956773	1	protein_coding
LINC00843	1.07512	0.000963908	1	lncRNA
BEND7	1.21165	0.000979494	1	protein_coding
MBD1	0.641745	0.000982864	1	protein_coding
ARF6	0.649243	0.000993596	1	protein_coding
FAM160B2	0.773415	0.000994869	1	protein_coding
SCAPER	0.988831	0.000995782	1	protein_coding
LPP	0.788638	0.000997775	1	protein_coding

## Sheet: HepG2_Upregulated >1,5
Gene name	LogFC	pValue	FDR	Biotype
INHBE	4.45279	1.84898e-33	3.913e-29	protein_coding
SLC44A2	3.96673	1.75456e-26	3.713e-22	protein_coding
ATF3	3.49269	1.969e-24	4.16661e-20	protein_coding
NUPR1	3.27431	2.17284e-23	4.59751e-19	protein_coding
PPP1R13B	2.33898	1.82342e-22	3.85799e-18	protein_coding
ARRDC3	2.69271	3.1711e-21	6.70879e-17	protein_coding
SMG1P3	3.06881	4.8565e-20	1.02739e-15	transcribed_unprocessed_pseudogene
BCL3	2.05732	2.19763e-19	4.64886e-15	protein_coding
TUFT1	2.3859	5.66008e-18	1.19728e-13	protein_coding
ADGRG1	2.51606	8.89908e-18	1.88233e-13	protein_coding
PIM1	2.78678	1.53986e-17	3.25681e-13	protein_coding
DUSP8	3.31479	2.40717e-17	5.09092e-13	protein_coding
NR1D1	3.37719	2.57824e-17	5.45247e-13	protein_coding
HAMP	2.00965	3.17021e-17	6.70373e-13	protein_coding
ERN1	2.05624	3.39859e-17	7.18633e-13	protein_coding
SERTAD2	1.74751	4.15969e-17	8.79525e-13	protein_coding
NR3C1	1.79344	1.85381e-16	3.91915e-12	protein_coding
AC079781.5	2.31666	2.38652e-16	5.04509e-12	lncRNA
CRTC3	1.90194	2.40738e-16	5.08896e-12	protein_coding
PPP1R15A	2.79958	4.50328e-16	9.51858e-12	protein_coding
AC022506.1	3.76707	5.7709e-16	1.21974e-11	protein_coding
ASNS	2.49644	6.61292e-16	1.39764e-11	protein_coding
SLC7A5P2	3.30075	1.29587e-15	2.73856e-11	transcribed_processed_pseudogene
DDIT3	3.21183	1.4325e-15	3.02716e-11	protein_coding
CLIP1	1.86218	2.03146e-15	4.29268e-11	protein_coding
CBX4	2.59726	2.12138e-15	4.48248e-11	protein_coding
BBC3	1.82226	3.46885e-15	7.32934e-11	protein_coding
DUSP1	2.73938	4.77392e-15	1.00859e-10	protein_coding
FGD4	2.15446	6.20563e-15	1.311e-10	protein_coding
GNA13	1.79475	8.51751e-15	1.79932e-10	protein_coding
ACVR1	2.25265	8.71392e-15	1.84073e-10	protein_coding
ALMS1-IT1	3.71061	1.33866e-14	2.82766e-10	lncRNA
TBX4	2.58566	1.43445e-14	3.02985e-10	protein_coding
AKNA	2.29698	3.23393e-14	6.82942e-10	protein_coding
AXIN2	2.01212	3.51333e-14	7.41909e-10	protein_coding
ELF3	2.04271	4.36137e-14	9.20947e-10	protein_coding
SLC25A25	2.53742	4.525e-14	9.55453e-10	protein_coding
MEF2B	2.29223	7.83775e-14	1.65478e-09	protein_coding
MEF2B	2.29223	7.83775e-14	1.65478e-09	protein_coding
DDIT4	2.084	8.32162e-14	1.75678e-09	protein_coding
NR1D2	1.88684	8.67315e-14	1.8309e-09	protein_coding
AL691482.3	2.00197	3.05476e-13	6.44677e-09	lncRNA
PALM2-AKAP2	1.57133	3.612e-13	7.6224e-09	protein_coding
SMAD7	1.88231	4.73674e-13	9.99498e-09	protein_coding
SIK3	1.61418	9.06628e-13	1.9128e-08	protein_coding
IGFALS	2.26221	1.09143e-12	2.30248e-08	protein_coding
SLC7A11	2.56134	1.48171e-12	3.12568e-08	protein_coding
GSE1	1.84915	1.5846e-12	3.3424e-08	protein_coding
AMOTL2	1.94644	1.68135e-12	3.54631e-08	protein_coding
TRIB3	2.19302	1.79627e-12	3.78852e-08	protein_coding
CEBPB	1.79687	2.50359e-12	5.27981e-08	protein_coding
AC004805.1	2.58576	2.53892e-12	5.35408e-08	protein_coding
LONRF3	2.32182	2.5875e-12	5.45626e-08	protein_coding
JAG1	1.93558	2.73135e-12	5.75932e-08	protein_coding
GPCPD1	2.18717	2.87958e-12	6.07159e-08	protein_coding
BCAR3	1.73584	2.95151e-12	6.22297e-08	protein_coding
BCAR3	1.73584	2.95151e-12	6.22297e-08	protein_coding
HIC2	1.8236	2.95374e-12	6.22707e-08	protein_coding
TIPARP	1.79065	3.03831e-12	6.40506e-08	protein_coding
SKIL	1.83598	3.22083e-12	6.78918e-08	protein_coding
ELMSAN1	2.23134	3.29198e-12	6.93883e-08	protein_coding
ZBTB10	1.56997	3.71557e-12	7.83131e-08	protein_coding
HCFC2	2.177	4.03807e-12	8.51064e-08	protein_coding
GADD45B	3.01303	5.7459e-12	1.21089e-07	protein_coding
SH3BP2	1.92028	8.34956e-12	1.7595e-07	protein_coding
KDM6B	2.02466	8.69498e-12	1.83221e-07	protein_coding
SDC4	1.97275	8.75915e-12	1.84564e-07	protein_coding
LRIG2	1.50729	1.15708e-11	2.43784e-07	protein_coding
STC2	2.34144	1.18663e-11	2.49998e-07	protein_coding
UHRF1BP1	1.55992	1.23403e-11	2.59974e-07	protein_coding
RAPH1	1.67403	1.28402e-11	2.70491e-07	protein_coding
SLC20A2	1.59084	1.53804e-11	3.23973e-07	protein_coding
TUBE1	1.75396	2.61859e-11	5.51501e-07	protein_coding
HRH3	3.35345	3.23069e-11	6.80382e-07	protein_coding
JDP2	2.57517	4.41536e-11	9.29787e-07	protein_coding
MYO7A	1.51665	5.63069e-11	1.18549e-06	protein_coding
GNAI1	1.74463	6.27471e-11	1.32101e-06	protein_coding
CCPG1	1.52543	8.94428e-11	1.88259e-06	protein_coding
SIGIRR	2.03985	8.95192e-11	1.88411e-06	protein_coding
SAMD4A	1.67127	1.04836e-10	2.20638e-06	protein_coding
ELFN1	2.37885	1.06678e-10	2.24504e-06	protein_coding
TMEM268	1.89349	1.245e-10	2.61998e-06	protein_coding
PPFIBP1	1.59768	1.58418e-10	3.3336e-06	protein_coding
GLIS2	2.62289	1.89144e-10	3.9794e-06	protein_coding
MYO10	1.85289	2.1696e-10	4.56396e-06	protein_coding
RARA	1.678	2.36813e-10	4.98113e-06	protein_coding
SH2B3	1.80175	2.49106e-10	5.23921e-06	protein_coding
PER2	1.88458	2.58669e-10	5.44007e-06	protein_coding
AGO2	1.58981	2.71851e-10	5.71703e-06	protein_coding
ZNF460	2.62966	3.37692e-10	7.10065e-06	protein_coding
ZEB1	1.72215	4.02167e-10	8.45517e-06	protein_coding
PHF3	1.61425	5.16798e-10	1.08616e-05	protein_coding
CCDC174	1.52786	6.13412e-10	1.28915e-05	protein_coding
RAB3IL1	1.90749	7.13053e-10	1.4982e-05	protein_coding
XRN1	1.55284	7.2124e-10	1.51533e-05	protein_coding
PDGFA	1.95691	9.1584e-10	1.92381e-05	protein_coding
GAB2	1.83909	9.94906e-10	2.0898e-05	protein_coding
LCA5	1.66816	9.9853e-10	2.09731e-05	protein_coding
LRIG3	2.22296	1.14971e-09	2.4144e-05	protein_coding
GADD45A	1.73311	1.21235e-09	2.54582e-05	protein_coding
MED13L	1.58311	1.26535e-09	2.65687e-05	protein_coding
ATXN7	1.50631	1.745e-09	3.66241e-05	protein_coding
IFRD1	1.83334	1.97069e-09	4.13568e-05	protein_coding
HMGN1P3	5.60614	2.20459e-09	4.62589e-05	processed_pseudogene
NEURL3	2.71687	2.59436e-09	5.44271e-05	protein_coding
MTMR3	1.50384	2.88389e-09	6.04925e-05	protein_coding
PROSER2	1.64509	3.01304e-09	6.31986e-05	protein_coding
CREBRF	1.90564	3.34738e-09	7.02012e-05	protein_coding
CPEB4	1.94645	3.39644e-09	7.12267e-05	protein_coding
SIK1B	1.70008	4.17674e-09	8.75736e-05	protein_coding
ZXDB	1.6397	4.66838e-09	9.78633e-05	protein_coding
PLEKHM3	1.90016	4.90538e-09	0.000102822	protein_coding
GDF15	2.21831	5.95067e-09	0.000124702	protein_coding
CCN1	2.77863	6.98528e-09	0.000146314	protein_coding
OCLN	1.54257	8.37775e-09	0.000175447	protein_coding
CTH	1.71113	8.44284e-09	0.000176802	protein_coding
TRIM36	1.75615	8.74042e-09	0.000183024	protein_coding
JMY	1.72721	9.65801e-09	0.000202229	protein_coding
AJUBA	1.72954	9.92534e-09	0.000207817	protein_coding
SIRT1	1.50601	9.95038e-09	0.000208331	protein_coding
AC055811.2	1.82787	1.0095e-08	0.000211338	protein_coding
ANGPTL8	2.05667	1.04075e-08	0.00021787	protein_coding
CAPN5	2.4457	1.12089e-08	0.000234625	protein_coding
CYP1A1	2.1574	1.16212e-08	0.000243243	protein_coding
JUN	1.90578	1.33842e-08	0.000280065	protein_coding
CEBPG	1.72303	1.3446e-08	0.000281345	protein_coding
NFIL3	1.85102	1.52112e-08	0.000318204	protein_coding
CIDECP1	1.66609	1.54237e-08	0.000322618	transcribed_unprocessed_pseudogene
FGFR3	1.57993	1.57098e-08	0.00032857	protein_coding
THBS1	1.6983	1.57798e-08	0.000330018	protein_coding
KIAA1958	1.5146	1.61336e-08	0.00033737	protein_coding
MRTFA	1.68833	1.68138e-08	0.000351577	protein_coding
ABCA5	1.73022	1.76754e-08	0.000369539	protein_coding
PARD3B	1.52007	1.78523e-08	0.00037322	protein_coding
SYDE2	2.13001	1.89731e-08	0.000396575	protein_coding
JUNB	2.10922	2.36446e-08	0.000493935	protein_coding
CLK4	1.73728	2.38945e-08	0.000499107	protein_coding
ATP8B1	1.79913	2.45432e-08	0.000512608	protein_coding
SLC3A2	1.9849	3.68179e-08	0.000768315	protein_coding
SOCS6	1.59872	3.7211e-08	0.000776483	protein_coding
PIM3	1.99825	3.77002e-08	0.000786616	protein_coding
AC067931.1	2.99847	3.9377e-08	0.000821562	TEC
AC018638.5	2.13158	4.06618e-08	0.000848205	processed_pseudogene
SAMD11	3.23	4.22583e-08	0.000881298	protein_coding
ANKRD33B	3.50343	4.33663e-08	0.000904317	protein_coding
GARS	1.50913	6.91545e-08	0.0014409	protein_coding
DLC1	1.62877	7.43804e-08	0.00154949	protein_coding
AC012181.2	2.65989	7.71502e-08	0.00160688	lncRNA
NOS1AP	1.88505	1.0335e-07	0.00215113	protein_coding
ADAMTSL2	1.53311	1.18601e-07	0.00246761	protein_coding
SMURF1	1.55777	1.45389e-07	0.00302336	protein_coding
CASTOR2	2.43825	1.6735e-07	0.00347887	protein_coding
RASAL2	1.75838	1.73065e-07	0.00359716	protein_coding
RPL39P5	1.50447	1.80207e-07	0.00374525	transcribed_processed_pseudogene
NAGS	1.7514	2.76092e-07	0.00573305	protein_coding
MT-RNR2	1.65533	2.97539e-07	0.00617542	Mt_rRNA
KDM7A	1.90343	3.7165e-07	0.00770654	protein_coding
SLC48A1	1.5855	3.73976e-07	0.0077544	protein_coding
AC119674.2	1.5039	4.34936e-07	0.009011	protein_coding
ATAD2B	1.51269	4.39404e-07	0.00910312	protein_coding
CPEB2	1.94909	5.01076e-07	0.0103773	protein_coding
SIAH2	1.59724	5.01412e-07	0.0103837	protein_coding
AC073052.1	6.48746	5.23009e-07	0.0108294	processed_pseudogene
PMAIP1	1.64441	5.48574e-07	0.0113549	protein_coding
RND1	2.08934	5.87693e-07	0.0121623	protein_coding
FLCN	1.57906	5.97896e-07	0.0123711	protein_coding
AC037198.1	2.61066	6.77202e-07	0.0140032	lncRNA
RUSC2	1.52249	7.06103e-07	0.0145966	protein_coding
RORA	1.56425	8.53948e-07	0.01764	protein_coding
TINAGL1	1.61057	9.00344e-07	0.0185894	protein_coding
AC087588.2	3.33845	9.537e-07	0.0196863	lncRNA
AQP7	2.64777	1.27183e-06	0.0262175	protein_coding
AQP7	2.64777	1.27183e-06	0.0262175	protein_coding
VEGFA	1.67667	1.36105e-06	0.0280471	protein_coding
MT1B	3.27746	1.43366e-06	0.0295333	protein_coding
AC129492.1	1.57117	1.48628e-06	0.0306115	protein_coding
CYP19A1	1.68002	1.50199e-06	0.0309274	protein_coding
AL606834.1	1.91529	1.502e-06	0.0309274	lncRNA
SLC22A7	1.5077	1.52183e-06	0.0313314	protein_coding
TRAPPC10	1.53882	1.59291e-06	0.0327868	protein_coding
SESN2	1.6998	1.77476e-06	0.0365069	protein_coding
PXK	1.54344	2.30253e-06	0.047287	protein_coding
SYNE3	1.58421	2.38968e-06	0.0490648	protein_coding
NUAK2	1.97069	2.56776e-06	0.0527059	protein_coding
AL359736.1	2.03992	2.57399e-06	0.0528311	protein_coding
ZNF34	1.53531	2.80069e-06	0.0574702	protein_coding
ZNF433	1.54695	2.92171e-06	0.0599214	protein_coding
RNA5SP155	6.61076	2.94655e-06	0.0604279	rRNA_pseudogene
CYP4F3	1.89989	3.14641e-06	0.0645014	protein_coding
CDK17	1.52744	5.5628e-06	0.113631	protein_coding
RBM24	1.73395	7.18432e-06	0.146445	protein_coding
RNU6-574P	4.19058	7.27231e-06	0.14821	snRNA
MISP	2.032	7.49076e-06	0.152647	protein_coding
KLF11	1.54396	7.53437e-06	0.15352	protein_coding
LINC02246	1.58365	7.74551e-06	0.157791	lncRNA
AC040169.3	3.73869	7.80561e-06	0.158993	lncRNA
NOTCH1	1.72802	7.81002e-06	0.159074	protein_coding
BIK	2.47241	8.19078e-06	0.166789	protein_coding
AP001033.2	3.06628	8.82416e-06	0.17958	lncRNA
ARHGEF2	1.56975	9.32297e-06	0.189667	protein_coding
MTRNR2L12	1.79145	9.75009e-06	0.198258	protein_coding
HIVEP2	1.64545	1.23932e-05	0.251618	protein_coding
MAFB	2.68354	1.40024e-05	0.284066	protein_coding
CLK1	1.57167	1.72543e-05	0.349521	protein_coding
PGLYRP2	2.1138	1.79013e-05	0.362465	protein_coding
ACTA1	1.57611	1.79185e-05	0.362796	protein_coding
CXCL3	3.56302	1.81785e-05	0.368005	protein_coding
LRRC70	4.77296	1.85067e-05	0.374593	protein_coding
UNC5B	1.72427	1.88354e-05	0.381153	protein_coding
AC137834.1	2.01	2.53647e-05	0.511987	protein_coding
AC026461.2	2.77732	3.02705e-05	0.609982	lncRNA
TNFRSF12A	1.79512	3.0738e-05	0.619341	protein_coding
TMEM131L	1.52957	3.97972e-05	0.799765	protein_coding
AC019117.3	1.62102	4.13996e-05	0.831759	protein_coding
ELOCP19	2.97795	4.14186e-05	0.832099	processed_pseudogene
SH3RF1	1.70992	4.19177e-05	0.842001	protein_coding
MT1X	1.50698	4.62694e-05	0.928349	protein_coding
CISH	1.55509	4.64652e-05	0.93223	protein_coding
TBX15	2.31398	4.68175e-05	0.93916	protein_coding
AC026461.1	1.51275	4.91467e-05	0.985342	lncRNA
EPHA2	1.50438	5.38191e-05	1	protein_coding
EREG	2.62396	6.20234e-05	1	protein_coding
LINC01473	2.53531	6.60128e-05	1	lncRNA
RASD1	1.96618	7.60221e-05	1	protein_coding
MEGF6	1.51153	8.64316e-05	1	protein_coding
TSC22D3	1.92735	8.98089e-05	1	protein_coding
KIAA1211	1.77216	9.60798e-05	1	protein_coding
LINC01572	1.65497	0.000114897	1	lncRNA
ALPG	6.23647	0.00012812	1	protein_coding
AC012181.1	2.8244	0.000135953	1	lncRNA
SMIM32	2.1717	0.000136632	1	protein_coding
AL009179.1	1.51795	0.000137093	1	lncRNA
AC108010.1	2.93848	0.000138472	1	lncRNA
VLDLR	2.12999	0.000139804	1	protein_coding
AC039056.2	4.32395	0.000146235	1	lncRNA
PKD1P6	1.53602	0.000158121	1	transcribed_unprocessed_pseudogene
CREB5	1.84858	0.00016199	1	protein_coding
NT5DC4	2.18293	0.000162301	1	protein_coding
PARGP1	1.83133	0.000189346	1	transcribed_unprocessed_pseudogene
SMARCD3	1.56501	0.000195131	1	protein_coding
ADAMTS6	1.92968	0.00020538	1	protein_coding
METRNL	1.52983	0.00022844	1	protein_coding
FUT1	4.55163	0.000238491	1	protein_coding
SIK1	1.7686	0.00025314	1	protein_coding
LINC01881	1.63283	0.000272703	1	transcribed_unprocessed_pseudogene
KLHDC7B	3.89924	0.000275726	1	protein_coding
PHYHIP	1.51443	0.000290459	1	protein_coding
NODAL	3.47616	0.00029626	1	protein_coding
EIF3CL	1.81441	0.000382219	1	protein_coding
AP001429.1	2.82958	0.000397818	1	lncRNA
GRB10	1.57291	0.000437227	1	protein_coding
AC036108.2	2.61705	0.000459996	1	lncRNA
WHAMMP3	1.67213	0.000490243	1	transcribed_unprocessed_pseudogene
MIR6758	3.36234	0.000529302	1	miRNA
SLC30A2	5.83909	0.000610128	1	protein_coding
ATOH8	1.90759	0.000612564	1	protein_coding
SERF1B	4.6153	0.000647806	1	protein_coding
SERF1B	4.6153	0.000647806	1	protein_coding
PTCH2	1.50711	0.000686578	1	protein_coding
AC005632.2	1.9261	0.000717171	1	lncRNA
MB21D2	1.53341	0.00075573	1	protein_coding
TENT5B	1.93017	0.000807401	1	protein_coding
SERPINE1	1.54372	0.000861374	1	protein_coding
FRY	1.60883	0.000874695	1	protein_coding

## Sheet: HepG2_Downregulated
Gene name	LogFC	pValue	FDR	Biotype
HSPA1A	-3.16367	2.31692e-24	4.90259e-20	protein_coding
EPOP	-2.56534	3.64283e-22	7.70714e-18	protein_coding
AP001505.1	-2.79005	1.37801e-17	2.91464e-13	lncRNA
NFE2	-2.59587	2.58537e-17	5.46728e-13	protein_coding
AL365181.3	-2.12271	1.56514e-16	3.30917e-12	lncRNA
FBXO9	-1.92965	1.78479e-16	3.77341e-12	protein_coding
HSPA8	-2.42162	2.64448e-16	5.5899e-12	protein_coding
FEN1	-2.09375	1.25304e-15	2.64817e-11	protein_coding
ZNF629	-1.941	4.5441e-15	9.60078e-11	protein_coding
AC074117.1	-1.57082	2.36786e-14	5.00115e-10	lncRNA
ILF3-DT	-2.29573	2.74551e-14	5.79853e-10	lncRNA
DNAJA1	-1.80302	3.17039e-14	6.69554e-10	protein_coding
C1QTNF1-AS1	-3.21291	6.88424e-14	1.45354e-09	lncRNA
ADAT3	-1.54729	1.64008e-13	3.46206e-09	protein_coding
EIF4E2	-1.3415	2.06158e-13	4.35138e-09	protein_coding
HSPA1B	-2.52423	2.88179e-13	6.0823e-09	protein_coding
DGCR8	-1.86918	2.93364e-13	6.19145e-09	protein_coding
RAB42	-2.25612	4.42193e-13	9.33116e-09	protein_coding
GINS1	-1.80204	7.17579e-13	1.51409e-08	protein_coding
NARF	-1.6139	8.58913e-13	1.81222e-08	protein_coding
LINC02119	-4.14622	1.06795e-12	2.25305e-08	lncRNA
EXOSC4	-1.3374	1.56869e-12	3.30899e-08	protein_coding
FAM111B	-2.4574	2.49946e-12	5.27137e-08	protein_coding
ELMOD2	-1.57467	3.10348e-12	6.54214e-08	protein_coding
ARRB1	-1.48184	4.9002e-12	1.03272e-07	protein_coding
IDI1	-2.49305	9.63784e-12	2.03069e-07	protein_coding
ENDOV	-1.54467	1.73116e-11	3.64633e-07	protein_coding
PCNA	-1.47138	4.78669e-11	1.00793e-06	protein_coding
HSPE1	-1.86833	4.99513e-11	1.05172e-06	protein_coding
APOL2	-1.8421	7.4106e-11	1.56e-06	protein_coding
POLR2L	-1.44036	7.65959e-11	1.61234e-06	protein_coding
GEMIN6	-1.61753	8.00721e-11	1.68544e-06	protein_coding
POLR3H	-1.37636	1.67881e-10	3.53255e-06	protein_coding
PAQR4	-1.61457	1.93233e-10	4.06525e-06	protein_coding
MTERF2	-1.56584	2.09761e-10	4.41274e-06	protein_coding
BRI3BP	-1.1828	2.20567e-10	4.63962e-06	protein_coding
ZBED8	-2.11179	2.46255e-10	5.17948e-06	protein_coding
PIGW	-1.38479	2.95314e-10	6.21016e-06	protein_coding
SDF2L1	-1.26561	4.31848e-10	9.0783e-06	protein_coding
MANF	-1.5615	4.70727e-10	9.89515e-06	protein_coding
H2AFX	-1.42828	4.77683e-10	1.00409e-05	protein_coding
TGFBR3	-1.69068	4.8984e-10	1.02959e-05	protein_coding
CPSF6	-1.2243	4.96598e-10	1.04375e-05	protein_coding
C1orf216	-3.1832	6.34984e-10	1.33442e-05	protein_coding
AC012065.3	-1.72782	6.39113e-10	1.34297e-05	lncRNA
TMPO-AS1	-2.77525	6.98329e-10	1.46733e-05	lncRNA
IGFBP1	-2.32899	7.72013e-10	1.62185e-05	protein_coding
DSN1	-1.31759	8.66326e-10	1.81989e-05	protein_coding
CYREN	-1.24358	1.05882e-09	2.22363e-05	protein_coding
PYCR3	-1.99412	1.29613e-09	2.7211e-05	protein_coding
MED6	-1.13723	1.34508e-09	2.82373e-05	protein_coding
SLCO4A1	-1.37731	1.57853e-09	3.3135e-05	protein_coding
NAPRT	-1.86705	1.72673e-09	3.62423e-05	protein_coding
MED31	-1.94334	1.96037e-09	4.11422e-05	protein_coding
ASF1B	-1.73055	2.00017e-09	4.19735e-05	protein_coding
PLLP	-1.23934	2.12397e-09	4.45694e-05	protein_coding
AL118506.1	-2.16378	2.20626e-09	4.62917e-05	lncRNA
TRIM56	-1.54785	2.36913e-09	4.97067e-05	protein_coding
SAA4	-1.84005	2.67503e-09	5.61167e-05	protein_coding
AL450998.2	-1.70873	2.80079e-09	5.87522e-05	lncRNA
TRNP1	-1.3055	3.11096e-09	6.52494e-05	protein_coding
P2RY11	-2.27639	3.11699e-09	6.53727e-05	protein_coding
NIPBL-DT	-1.44044	3.81648e-09	8.00317e-05	lncRNA
IMP3	-1.28075	4.21407e-09	8.83522e-05	protein_coding
ZCCHC17	-1.38543	4.65984e-09	9.76889e-05	protein_coding
LINC00909	-1.60867	5.22524e-09	0.000109521	lncRNA
AP001972.5	-2.18996	5.96585e-09	0.000125014	TEC
PPFIA3	-1.13867	6.10066e-09	0.000127833	protein_coding
HMGN3	-1.2936	6.32811e-09	0.000132593	protein_coding
FDPS	-1.21294	6.39698e-09	0.00013403	protein_coding
MAGEH1	-3.08583	6.41136e-09	0.000134324	protein_coding
C12orf43	-1.13718	6.65613e-09	0.000139446	protein_coding
PELI3	-1.71748	6.90266e-09	0.000144597	protein_coding
AC009118.2	-2.66803	6.91399e-09	0.000144827	lncRNA
LNP1	-1.75779	7.04021e-09	0.000147457	protein_coding
SAA2-SAA4	-1.83258	7.79423e-09	0.000163242	protein_coding
AC068631.3	-1.80801	1.06843e-08	0.000223655	processed_pseudogene
PART1	-2.63748	1.17997e-08	0.000246955	lncRNA
SEC61G	-1.31606	1.22887e-08	0.000257178	protein_coding
AC012313.1	-1.89323	1.27476e-08	0.000266769	lncRNA
AC009133.6	-1.14221	1.33525e-08	0.000279415	protein_coding
CLDN2	-2.20267	1.34494e-08	0.000281402	protein_coding
POP5	-1.08567	1.55384e-08	0.000325001	protein_coding
LRRC20	-1.15097	1.59909e-08	0.000334418	protein_coding
C4orf3	-1.24964	1.70283e-08	0.000356028	protein_coding
AL135905.1	-2.36905	1.84224e-08	0.000385084	lncRNA
EXOC3-AS1	-2.04737	1.93594e-08	0.000404631	lncRNA
PET100	-1.56544	1.95014e-08	0.00040756	protein_coding
LINC01521	-2.56851	1.98883e-08	0.000415626	lncRNA
MEX3A	-1.16755	2.16549e-08	0.000452479	protein_coding
NANOS1	-2.2793	2.16856e-08	0.0004531	protein_coding
AL161772.1	-1.67369	2.29275e-08	0.000479002	lncRNA
KDM7A-DT	-1.55866	2.3793e-08	0.000497012	lncRNA
AC015982.1	-2.09916	2.42259e-08	0.000506006	lncRNA
TPM3P9	-1.85533	2.51868e-08	0.000526027	transcribed_processed_pseudogene
MESD	-1.13066	2.57898e-08	0.000538568	protein_coding
TEDC1	-1.38527	2.61374e-08	0.000545802	protein_coding
CRELD2	-1.09517	2.68285e-08	0.000560205	protein_coding
OPN3	-1.68301	2.90117e-08	0.000605647	protein_coding
TMEM139	-1.32834	3.09936e-08	0.000646991	protein_coding
GABPB1-IT1	-1.48017	3.42804e-08	0.000715502	lncRNA
PPP1R10	-1.43719	3.49896e-08	0.000730268	protein_coding
BTN3A2	-1.23488	3.60711e-08	0.000752768	protein_coding
RPUSD1	-1.12017	4.0227e-08	0.000839216	protein_coding
TM2D2	-1.09827	4.09976e-08	0.000855128	protein_coding
LDLR	-1.72612	4.10614e-08	0.000856418	protein_coding
XXYLT1	-1.23802	4.1614e-08	0.000867901	protein_coding
AC120114.4	-1.17473	4.72943e-08	0.000986134	protein_coding
ZNF747	-1.83864	4.83646e-08	0.0010084	protein_coding
LPAR6	-1.5637	5.00621e-08	0.00104364	protein_coding
LINC02001	-1.80013	5.45507e-08	0.00113705	lncRNA
RPS26	-1.14213	6.07422e-08	0.00126599	protein_coding
CHPF2	-1.25594	6.372e-08	0.00132799	protein_coding
GDF11	-1.53982	6.58584e-08	0.00137249	protein_coding
CHORDC1	-1.00131	6.72778e-08	0.00140193	protein_coding
TSPYL4	-1.31165	6.89806e-08	0.00143735	protein_coding
SLC6A14	-2.43723	7.50712e-08	0.00156373	protein_coding
ZNF514	-1.71252	7.66459e-08	0.00159646	protein_coding
CCDC137	-1.17728	7.91214e-08	0.00164786	protein_coding
ALG2	-0.985466	8.04136e-08	0.00167453	protein_coding
MVK	-1.48984	8.19974e-08	0.00170743	protein_coding
SLC2A10	-2.11482	8.8745e-08	0.00184758	protein_coding
CSTF3	-1.67955	1.05448e-07	0.00219468	protein_coding
ANKS6	-1.261	1.08292e-07	0.00225377	protein_coding
LRR1	-0.964239	1.10773e-07	0.00230529	protein_coding
LRG1	-1.1808	1.11496e-07	0.00232024	protein_coding
AKT1S1	-0.984774	1.1411e-07	0.00237451	protein_coding
EMP2	-1.87791	1.1817e-07	0.00245875	protein_coding
IPO5P1	-2.7723	1.25245e-07	0.0026056	transcribed_processed_pseudogene
AC016394.2	-1.98111	1.2536e-07	0.00260787	lncRNA
FAM83H	-1.35791	1.30349e-07	0.00271138	protein_coding
FANCL	-1.12044	1.40011e-07	0.00291208	protein_coding
CENPB	-1.45808	1.41233e-07	0.00293736	protein_coding
INTS5	-1.33293	1.42788e-07	0.00296956	protein_coding
C9orf40	-1.40208	1.57374e-07	0.00327227	protein_coding
LINC00205	-1.71145	1.60873e-07	0.00334488	lncRNA
ENTPD7	-1.29128	1.66391e-07	0.00345928	protein_coding
LINC00667	-1.11306	1.67332e-07	0.00347867	lncRNA
MRM3	-0.915096	1.67505e-07	0.00348193	protein_coding
MIR671	-1.71178	1.72859e-07	0.00359306	miRNA
AC096677.2	-1.57872	1.82747e-07	0.00379785	lncRNA
PAGR1	-1.08863	1.98845e-07	0.00413141	protein_coding
ACAT2	-1.43231	1.99947e-07	0.00415411	protein_coding
AC015813.5	-3.21795	2.03662e-07	0.00423088	TEC
JMJD4	-1.21976	2.18224e-07	0.00453273	protein_coding
TTC28-AS1	-1.3086	2.28627e-07	0.00474835	lncRNA
CNPY2	-1.09439	2.44367e-07	0.005075	protein_coding
HOXD1	-3.84847	2.46301e-07	0.00511494	protein_coding
AL928654.1	-2.28547	2.57083e-07	0.00533859	lncRNA
RF02160	-3.33664	2.76164e-07	0.00573427	misc_RNA
PIM2	-1.0558	2.84721e-07	0.00591138	protein_coding
LINC01134	-2.38775	2.85384e-07	0.00592485	lncRNA
SNHG10	-1.51015	2.90161e-07	0.00602346	lncRNA
STEAP3	-1.17604	2.9549e-07	0.00613349	protein_coding
AMIGO3	-2.48132	3.05479e-07	0.00633961	protein_coding
CYGB	-1.37828	3.06752e-07	0.00636572	protein_coding
TMEM186	-1.067	3.13527e-07	0.006506	protein_coding
LMAN2L	-1.07554	3.18524e-07	0.00660905	protein_coding
MVD	-1.63513	3.18679e-07	0.00661194	protein_coding
DDN	-2.82525	3.293e-07	0.00683132	protein_coding
EMC3-AS1	-2.18743	3.49787e-07	0.00725494	transcribed_unprocessed_pseudogene
AC020915.3	-1.48379	3.82235e-07	0.00792487	lncRNA
AL139260.3	-1.01607	3.85439e-07	0.00799091	protein_coding
METTL7B	-1.27822	3.91622e-07	0.00811832	protein_coding
AC026464.2	-1.19576	3.92309e-07	0.00813218	lncRNA
UFD1	-0.999423	3.93173e-07	0.00814968	protein_coding
AC026304.1	-2.21394	4.06256e-07	0.00841966	lncRNA
SQLE	-1.83634	4.08277e-07	0.00846114	protein_coding
FDFT1	-1.35902	4.22053e-07	0.00874578	protein_coding
PURB	-1.28514	4.29256e-07	0.0088946	protein_coding
TNFAIP8L1	-0.997441	4.53497e-07	0.00939373	protein_coding
TASOR	-1.16781	4.63472e-07	0.00959989	protein_coding
ADORA2B	-1.3501	4.9035e-07	0.0101556	protein_coding
PDCD2	-1.051	5.0704e-07	0.0104993	protein_coding
CCR6	-2.0021	5.32409e-07	0.0110219	protein_coding
GPANK1	-1.06879	5.42105e-07	0.0112221	protein_coding
MSMO1	-1.83766	5.838e-07	0.0120829	protein_coding
RFX5	-0.990675	5.94065e-07	0.012293	protein_coding
MLLT6	-1.10687	6.04973e-07	0.0125163	protein_coding
OTUD6B-AS1	-1.44215	6.10372e-07	0.0126274	lncRNA
FBXL19-AS1	-2.75034	6.19448e-07	0.0128145	lncRNA
PLSCR1	-1.09366	6.26517e-07	0.0129601	protein_coding
LCMT2	-1.68912	6.32239e-07	0.0130779	protein_coding
SPCS3	-0.871396	6.44598e-07	0.0133316	protein_coding
PAQR9	-1.36132	6.573e-07	0.0135936	protein_coding
PCOLCE2	-1.51023	6.64597e-07	0.0137439	protein_coding
SNX22	-2.19457	6.72341e-07	0.0139033	protein_coding
RAB30-AS1	-1.5557	6.81071e-07	0.0140818	lncRNA
GPLD1	-1.8512	6.99447e-07	0.0144604	protein_coding
METTL3	-1.12181	7.20966e-07	0.0149024	protein_coding
AC011498.7	-3.61446	7.60591e-07	0.0157199	TEC
SPC25	-1.00709	7.64854e-07	0.0158072	protein_coding
AL390195.1	-0.880145	7.66264e-07	0.0158356	lncRNA
AC018647.2	-1.81776	8.00533e-07	0.0165398	lncRNA
AC019069.1	-1.60916	8.3653e-07	0.0172827	lncRNA
SMLR1	-1.47274	8.38866e-07	0.0173301	protein_coding
OGFRP1	-2.34442	8.5385e-07	0.0176388	lncRNA
SAFB2	-1.12466	8.6043e-07	0.017773	protein_coding
MGAT5	-1.44146	8.8837e-07	0.0183448	protein_coding
CD47	-2.29358	9.05396e-07	0.0186928	protein_coding
HSPE1P2	-2.31557	9.08305e-07	0.018752	processed_pseudogene
NUP62	-0.930289	9.65443e-07	0.0199277	protein_coding
GLA	-1.01485	1.00276e-06	0.020693	protein_coding
RFWD3	-1.01549	1.01544e-06	0.0209536	protein_coding
FAM43B	-1.69858	1.048e-06	0.0216244	protein_coding
GINS3	-1.27165	1.10436e-06	0.0227852	protein_coding
ZNF599	-1.42065	1.12142e-06	0.023136	protein_coding
CBX2	-1.15225	1.13989e-06	0.0235149	protein_coding
MRTO4	-1.05393	1.14737e-06	0.0236669	protein_coding
EHBP1L1	-1.40591	1.17165e-06	0.0241664	protein_coding
SPATA33	-1.30739	1.21183e-06	0.024988	protein_coding
AC023509.3	-2.97812	1.27033e-06	0.0261879	lncRNA
C21orf58	-2.3172	1.27964e-06	0.026376	protein_coding
AC092171.5	-1.53309	1.28868e-06	0.026561	lncRNA
NES	-1.75135	1.29013e-06	0.0265896	protein_coding
OAZ2	-0.919923	1.33758e-06	0.0275648	protein_coding
TST	-1.17062	1.38051e-06	0.0284469	protein_coding
AC124067.4	-1.70182	1.41742e-06	0.0292059	lncRNA
ZRANB2	-1.35204	1.42535e-06	0.0293666	protein_coding
DUXAP8	-1.70617	1.43187e-06	0.0294993	lncRNA
DUXAP8	-1.70617	1.43187e-06	0.0294993	transcribed_processed_pseudogene
WDR92	-1.58672	1.45064e-06	0.0298803	protein_coding
MXD4	-1.15156	1.49461e-06	0.030777	protein_coding
ETNK1	-1.18849	1.50827e-06	0.0310539	protein_coding
RPA3	-1.06397	1.55505e-06	0.0320122	protein_coding
ALG5	-1.05235	1.57389e-06	0.032397	protein_coding
Z95115.1	-1.82602	1.5971e-06	0.0328714	lncRNA
ANKRD10	-1.22198	1.63601e-06	0.0336641	protein_coding
PIGM	-1.3451	1.67442e-06	0.0344512	protein_coding
AL118516.1	-1.14035	1.71411e-06	0.035266	lncRNA
AC142472.1	-2.70145	1.73269e-06	0.0356467	lncRNA
AC124798.1	-1.68715	1.74425e-06	0.0358827	lncRNA
ATPSCKMT	-1.0754	1.76338e-06	0.0362746	protein_coding
KIF9	-1.16947	1.79405e-06	0.0369017	protein_coding
DTYMK	-0.929852	1.80538e-06	0.0371311	protein_coding
MRPL20	-0.908796	1.88819e-06	0.0388211	protein_coding
EBP	-1.08244	1.89609e-06	0.0389817	protein_coding
ZNF556	-1.06155	1.94605e-06	0.0400069	protein_coding
METTL1	-1.00667	1.94833e-06	0.0400518	protein_coding
AC114271.1	-2.28735	1.94968e-06	0.0400777	lncRNA
EMILIN1	-1.1624	2.0728e-06	0.0425919	protein_coding
RFLNB	-1.13457	2.07807e-06	0.0426981	protein_coding
C1GALT1C1	-1.03841	2.13801e-06	0.0439253	protein_coding
DCAF16	-0.991417	2.18701e-06	0.0449299	protein_coding
CITED4	-1.01678	2.22361e-06	0.0456797	protein_coding
ZNF839	-1.41452	2.24143e-06	0.0460412	protein_coding
XRCC2	-1.44394	2.325e-06	0.0477439	protein_coding
TRMT10C	-1.14871	2.39892e-06	0.0492522	protein_coding
SMIM30	-1.23158	2.40398e-06	0.0493537	protein_coding
AC012510.1	-2.66546	2.47598e-06	0.0508245	lncRNA
UBB	-1.04358	2.66145e-06	0.0546182	protein_coding
HYAL3	-1.33824	2.82907e-06	0.0580497	protein_coding
ZNF559	-1.59622	2.84213e-06	0.0583121	protein_coding
TUBB4B	-1.24689	2.85738e-06	0.058622	protein_coding
MRPS17	-0.827495	2.86688e-06	0.0588141	protein_coding
AC009113.1	-2.72149	2.89963e-06	0.059483	lncRNA
CHMP6	-1.01208	2.91496e-06	0.0597858	protein_coding
GCSHP5	-1.08759	2.98558e-06	0.0612222	processed_pseudogene
HIBCH	-0.92966	3.01428e-06	0.0618077	protein_coding
SRSF3	-1.07729	3.17442e-06	0.0650724	protein_coding
TIMM8A	-1.00832	3.28233e-06	0.0672681	protein_coding
POP4	-0.900188	3.34557e-06	0.0685607	protein_coding
AC005329.1	-2.72259	3.3518e-06	0.0686851	lncRNA
ETAA1	-1.10444	3.53236e-06	0.0723709	protein_coding
RXYLT1	-1.22786	3.54042e-06	0.072529	protein_coding
DDN-AS1	-2.22544	3.5708e-06	0.0731408	lncRNA
TMEM74B	-1.08697	3.67388e-06	0.0752448	protein_coding
AP5M1	-0.951148	3.71318e-06	0.076046	protein_coding
AP001160.3	-2.60967	3.74649e-06	0.0767168	lncRNA
HPS6	-1.30886	3.7573e-06	0.0769346	protein_coding
B3GALT6	-1.38163	3.89323e-06	0.0797061	protein_coding
GINS2	-1.01423	3.9024e-06	0.0798899	protein_coding
KLHDC3	-0.91819	3.94555e-06	0.0807614	protein_coding
DEPP1	-1.99214	4.01975e-06	0.0822682	protein_coding
TIGD1	-1.63264	4.1795e-06	0.0855335	protein_coding
MYCBP	-0.977276	4.25451e-06	0.0870644	protein_coding
AL589743.1	-1.49633	4.41819e-06	0.090405	transcribed_processed_pseudogene
AC092647.5	-0.792714	4.45632e-06	0.0911764	protein_coding
TIMM17A	-0.882277	4.5592e-06	0.0932767	protein_coding
COX16	-0.973849	4.59367e-06	0.0939728	protein_coding
HILPDA	-1.07555	4.62083e-06	0.0945237	protein_coding
TMEM147-AS1	-2.18725	4.62401e-06	0.0945841	lncRNA
PFDN6	-1.11734	4.6578e-06	0.0952659	protein_coding
HSP90AA2P	-1.29553	4.68582e-06	0.0958203	processed_pseudogene
LINC00449	-3.83544	4.77064e-06	0.0975501	lncRNA
ZNF107	-1.37143	4.85934e-06	0.099359	protein_coding
NDUFB3	-1.21677	4.91155e-06	0.100422	protein_coding
TOMM40L	-1.13656	4.92676e-06	0.100723	protein_coding
TMEM121	-1.83675	4.99536e-06	0.102115	protein_coding
DUS2	-0.890429	5.06752e-06	0.103585	protein_coding
GCA	-0.964626	5.17594e-06	0.105786	protein_coding
HSPE1-MOB4	-1.43412	5.2537e-06	0.107365	protein_coding
C2orf68	-1.21561	5.25384e-06	0.107365	protein_coding
AC012360.3	-1.82428	5.34149e-06	0.109148	lncRNA
SFPQ	-1.1088	5.42634e-06	0.110865	protein_coding
SLC33A1	-1.00717	5.53465e-06	0.113062	protein_coding
AC004832.3	-1.09159	5.56693e-06	0.11371	protein_coding
DLGAP1-AS1	-1.40933	5.58018e-06	0.113975	lncRNA
C17orf100	-1.66857	5.58109e-06	0.113988	protein_coding
PURPL	-1.71217	5.64661e-06	0.115321	lncRNA
FAM217B	-1.25914	5.68803e-06	0.116161	protein_coding
BUD23	-0.87694	5.86434e-06	0.11975	protein_coding
LINC01124	-1.78621	5.93051e-06	0.121095	lncRNA
TIMM8B	-1.15112	5.98413e-06	0.122184	protein_coding
PHTF1	-0.998944	6.00331e-06	0.12257	protein_coding
MTFP1	-1.09454	6.10195e-06	0.124565	protein_coding
KAZALD1	-1.31259	6.14577e-06	0.125454	protein_coding
AC073896.1	-0.93735	6.15494e-06	0.125635	protein_coding
ITPRIPL1	-1.65325	6.15771e-06	0.125685	protein_coding
AL391244.2	-1.64695	6.17215e-06	0.125974	lncRNA
AC125807.2	-1.90617	6.2093e-06	0.126726	lncRNA
TUBA1C	-1.05282	6.24467e-06	0.127429	protein_coding
SUOX	-1.13844	6.2508e-06	0.127548	protein_coding
AC068338.2	-2.23244	6.28331e-06	0.128205	lncRNA
MRPS11	-0.890687	6.33668e-06	0.129287	protein_coding
ATP5MC1	-1.04487	6.37992e-06	0.130163	protein_coding
AGR2	-1.88163	6.51044e-06	0.1328	protein_coding
AL035461.2	-2.72791	6.61673e-06	0.134942	lncRNA
MRPS12	-0.928911	6.75654e-06	0.137779	protein_coding
HOMEZ	-1.13941	6.89522e-06	0.1406	protein_coding
FABP5	-1.0536	7.02694e-06	0.143258	protein_coding
TTC30A	-2.13956	7.1501e-06	0.145762	protein_coding
EEF1AKMT4	-1.23501	7.16736e-06	0.146107	protein_coding
ANAPC15	-0.996656	7.73718e-06	0.15763	protein_coding
CSRP2	-1.56467	7.74909e-06	0.157857	protein_coding
AC092718.4	-1.17722	7.99831e-06	0.162894	lncRNA
CASTOR3	-1.53775	8.02896e-06	0.16351	protein_coding
ELOVL6	-1.30361	8.21162e-06	0.167197	protein_coding
UBE2G2	-0.932641	8.44058e-06	0.171842	protein_coding
AC093323.1	-1.09203	8.50183e-06	0.17308	protein_coding
HMGCS1	-1.79534	8.73808e-06	0.177846	protein_coding
LINC01694	-2.12626	8.82827e-06	0.179655	lncRNA
AC004812.2	-1.84742	8.94308e-06	0.181974	lncRNA
CNBD2	-1.07709	9.0929e-06	0.185004	protein_coding
MIR1244-2	-1.15498	9.11263e-06	0.185397	miRNA
SPRYD4	-1.26494	9.36389e-06	0.19049	protein_coding
SKA3	-1.15867	9.38796e-06	0.19097	protein_coding
HAGLR	-1.85159	9.60155e-06	0.195305	lncRNA
SNRNP25	-1.01178	9.6056e-06	0.195378	protein_coding
CNP	-0.835361	9.60945e-06	0.195447	protein_coding
ARHGEF39	-1.42984	9.77291e-06	0.198713	protein_coding
PRADC1	-1.0608	9.86522e-06	0.20058	protein_coding
TRIM52	-1.91247	1.02617e-05	0.208619	protein_coding
BCL2L12	-0.813363	1.03845e-05	0.211096	protein_coding
IRF3	-0.870442	1.07545e-05	0.218595	protein_coding
UNC119B	-0.83167	1.09727e-05	0.222997	protein_coding
WDR73	-0.97652	1.10639e-05	0.224829	protein_coding
TRMU	-0.981296	1.1117e-05	0.225886	protein_coding
TAF7	-0.885346	1.16266e-05	0.236194	protein_coding
SYNJ2BP-COX16	-0.907713	1.16674e-05	0.236999	protein_coding
TTPAL	-0.909939	1.17031e-05	0.237702	protein_coding
VASH1-AS1	-2.06304	1.20148e-05	0.244021	lncRNA
MED11	-1.04013	1.22348e-05	0.248463	protein_coding
THAP7	-0.864776	1.22606e-05	0.248975	protein_coding
SMIM12	-0.750081	1.2264e-05	0.249033	protein_coding
FADD	-1.05942	1.23363e-05	0.25049	protein_coding
MAFG-DT	-1.5681	1.23396e-05	0.250544	lncRNA
TUG1	-0.995655	1.24788e-05	0.25332	lncRNA
EME2	-1.52706	1.26723e-05	0.257223	protein_coding
BISPR	-1.2916	1.33569e-05	0.271051	lncRNA
METAP1D	-1.20245	1.38856e-05	0.281725	protein_coding
FRG1HP	-1.37314	1.42862e-05	0.289767	transcribed_unprocessed_pseudogene
NIFK-AS1	-1.17274	1.44558e-05	0.293193	lncRNA
OXSM	-1.06306	1.44624e-05	0.293312	protein_coding
PWWP3A	-0.864554	1.46737e-05	0.297553	protein_coding
C1orf116	-3.6456	1.47977e-05	0.300053	protein_coding
NSDHL	-1.13746	1.48751e-05	0.301608	protein_coding
CCDC183	-1.35604	1.51198e-05	0.306553	protein_coding
TTC1	-0.87723	1.53268e-05	0.31072	protein_coding
BST2	-0.970369	1.53738e-05	0.311658	protein_coding
TMCC1-AS1	-1.97615	1.56009e-05	0.316199	lncRNA
BTN2A2	-1.02904	1.56194e-05	0.316557	protein_coding
MRPL20-AS1	-0.862066	1.57928e-05	0.320042	lncRNA
MGAT2	-0.925357	1.60285e-05	0.324802	protein_coding
CBR1	-0.828345	1.63083e-05	0.330454	protein_coding
APCDD1	-3.12162	1.70587e-05	0.345626	protein_coding
AP001453.5	-1.05489	1.71658e-05	0.347745	protein_coding
AC243964.2	-1.17259	1.73251e-05	0.35092	lncRNA
TBL2	-0.880592	1.73639e-05	0.351687	protein_coding
WDR77	-0.860966	1.75035e-05	0.354499	protein_coding
SMIM4	-0.999991	1.75829e-05	0.356088	protein_coding
FKBP2	-1.0552	1.76811e-05	0.358061	protein_coding
TRIP13	-1.00015	1.81019e-05	0.366474	protein_coding
AL391832.2	-2.4751	1.85236e-05	0.374917	lncRNA
RPL36AL	-0.947756	1.85457e-05	0.375347	protein_coding
ZNF69	-1.34083	1.85889e-05	0.376201	protein_coding
NDUFAF8	-0.857812	1.86092e-05	0.376595	protein_coding
AC010442.1	-1.18337	1.89754e-05	0.383948	lncRNA
CETN2	-0.884163	1.90635e-05	0.385711	protein_coding
SLC35C2	-0.795133	1.90812e-05	0.38605	protein_coding
CCDC167	-1.11415	1.92601e-05	0.38965	protein_coding
TUBA1B	-1.02418	1.93237e-05	0.390919	protein_coding
TIMM21	-1.07113	1.94482e-05	0.393379	protein_coding
NQO2	-0.864238	1.95163e-05	0.394737	protein_coding
P3H4	-1.0351	1.96343e-05	0.397084	protein_coding
LINC02535	-2.39541	2.00445e-05	0.405361	lncRNA
RBM4B	-1.04876	2.02489e-05	0.409453	protein_coding
MRM1	-1.13658	2.0688e-05	0.418312	protein_coding
KLHL22	-1.31163	2.07993e-05	0.420499	protein_coding
AC092718.8	-0.962892	2.0832e-05	0.42114	protein_coding
ANAPC2	-0.852691	2.14379e-05	0.433366	protein_coding
KRT8P12	-2.36141	2.14904e-05	0.434385	transcribed_processed_pseudogene
AC083880.1	-1.90253	2.21353e-05	0.447332	lncRNA
AC021242.3	-2.38795	2.2257e-05	0.44977	lncRNA
AC092718.3	-0.960488	2.24223e-05	0.453087	protein_coding
SLC9A3	-1.14804	2.26886e-05	0.458399	protein_coding
SRSF5	-1.32411	2.31093e-05	0.466855	protein_coding
GASAL1	-1.43244	2.31973e-05	0.468585	lncRNA
PNRC2	-1.04807	2.34672e-05	0.473991	protein_coding
TARDBP	-0.817974	2.36221e-05	0.477049	protein_coding
ETV4	-1.34495	2.38981e-05	0.48255	protein_coding
TPRKB	-0.844112	2.40546e-05	0.485662	protein_coding
GON7	-1.29631	2.42777e-05	0.490118	protein_coding
CBX6	-1.01225	2.58875e-05	0.522385	protein_coding
ZNF213-AS1	-1.58831	2.6158e-05	0.52779	lncRNA
SLC26A1	-1.06248	2.68744e-05	0.542164	protein_coding
CCL20	-1.5967	2.72622e-05	0.54996	protein_coding
PLIN3	-0.833179	2.72759e-05	0.55021	protein_coding
SOD2-OT1	-2.75037	2.7438e-05	0.553453	lncRNA
AC008438.1	-1.91999	2.74945e-05	0.554564	lncRNA
UFSP1	-1.69852	2.78608e-05	0.561925	protein_coding
PSMA5	-0.73764	2.79188e-05	0.563067	protein_coding
LSM3	-1.10481	2.83215e-05	0.571131	protein_coding
FAM19A5	-1.0426	2.88193e-05	0.581141	protein_coding
LDLRAP1	-1.01025	2.88394e-05	0.581518	protein_coding
DMAC1	-0.888207	2.88923e-05	0.582527	protein_coding
PXN-AS1	-1.0172	2.92707e-05	0.590097	lncRNA
AC004057.1	-1.1973	2.95833e-05	0.59637	transcribed_processed_pseudogene
ITGB1BP1	-0.843201	2.97084e-05	0.598832	protein_coding
NUDT1	-0.849928	2.99006e-05	0.602676	protein_coding
GCSH	-0.949876	3.00176e-05	0.604974	protein_coding
TPRG1L	-0.963111	3.23127e-05	0.650939	protein_coding
CPT2	-1.19859	3.23321e-05	0.651298	protein_coding
RPS20P21	-2.90939	3.25322e-05	0.655264	processed_pseudogene
STMN1	-0.785453	3.43087e-05	0.690806	protein_coding
EXO5	-0.922908	3.45337e-05	0.695301	protein_coding
TUBD1	-1.15991	3.45897e-05	0.69636	protein_coding
C6orf62	-0.830947	3.51408e-05	0.707419	protein_coding
AC025449.1	-2.33491	3.53666e-05	0.711929	processed_pseudogene
SNRPD2	-0.943779	3.54142e-05	0.712852	protein_coding
TESC	-0.970081	3.56304e-05	0.717168	protein_coding
MLKL	-1.31078	3.58535e-05	0.721622	protein_coding
NDUFB1	-1.13558	3.60404e-05	0.725349	protein_coding
DAD1	-0.956018	3.65667e-05	0.735832	protein_coding
APOL1	-1.54575	3.65755e-05	0.735972	protein_coding
C11orf24	-0.79917	3.67326e-05	0.739096	protein_coding
MRPL17	-0.765009	3.687e-05	0.741825	protein_coding
TFPI	-0.978407	3.71999e-05	0.748388	protein_coding
CFAP44	-2.15725	3.72336e-05	0.749029	protein_coding
TMEM102	-1.3982	3.72537e-05	0.749396	protein_coding
SSU72	-0.964669	3.7407e-05	0.752404	protein_coding
PIK3R3	-2.1151	3.78305e-05	0.760847	protein_coding
CHKA	-0.991968	3.83525e-05	0.771193	protein_coding
ZNF32	-1.02765	3.83709e-05	0.771524	protein_coding
AL121658.1	-2.01999	3.84024e-05	0.772118	lncRNA
SFXN2	-1.12339	3.87207e-05	0.778479	protein_coding
THUMPD3-AS1	-1.3042	3.87266e-05	0.77856	lncRNA
SRSF2	-1.01969	3.87771e-05	0.779536	protein_coding
SERPINB9	-1.13986	3.94849e-05	0.793686	protein_coding
JAGN1	-0.835015	3.9645e-05	0.796864	protein_coding
SF3B5	-1.01253	3.96488e-05	0.796864	protein_coding
FAM171A1	-0.827928	3.97637e-05	0.799131	protein_coding
NLGN2	-1.19444	4.04309e-05	0.812377	protein_coding
AC016405.3	-1.75707	4.05044e-05	0.813814	lncRNA
ZNF544	-0.946321	4.1553e-05	0.834718	protein_coding
CYBC1	-0.821775	4.2314e-05	0.849919	protein_coding
SRRT	-1.10355	4.27963e-05	0.859521	protein_coding
ZNF37BP	-1.76487	4.37324e-05	0.87806	transcribed_processed_pseudogene
PABPN1	-1.05508	4.4248e-05	0.888323	protein_coding
AC064836.3	-2.06036	4.46828e-05	0.896829	lncRNA
TCF19	-1.01359	4.49767e-05	0.902683	protein_coding
SLC16A13	-1.29151	4.51285e-05	0.905638	protein_coding
MIMT1	-1.6402	4.54967e-05	0.912892	lncRNA
TCTEX1D2	-1.42744	4.6699e-05	0.936829	protein_coding
CDC6	-1.04796	4.79363e-05	0.961458	protein_coding
AC006449.6	-1.67288	4.83931e-05	0.970476	lncRNA
MARCKSL1	-0.801474	4.88655e-05	0.979803	protein_coding
TSFM	-0.683954	4.90624e-05	0.983701	protein_coding
AC104113.1	-2.06006	5.00727e-05	1	lncRNA
AC010642.2	-1.20149	5.04504e-05	1	lncRNA
DEXI	-0.714178	5.07313e-05	1	protein_coding
ESCO2	-1.01857	5.10162e-05	1	protein_coding
HNRNPM	-0.921701	5.12204e-05	1	protein_coding
NRSN2	-0.882773	5.2586e-05	1	protein_coding
CISD1	-0.88718	5.28413e-05	1	protein_coding
UNKL	-0.932416	5.28983e-05	1	protein_coding
CCDC102B	-2.22699	5.29366e-05	1	protein_coding
IKBIP	-0.91013	5.3325e-05	1	protein_coding
MRM2	-0.710717	5.33465e-05	1	protein_coding
AL355987.4	-0.848136	5.37159e-05	1	lncRNA
SMOC1	-0.90259	5.40338e-05	1	protein_coding
AP003392.4	-2.59702	5.41474e-05	1	lncRNA
PDCD5	-0.915331	5.4372e-05	1	protein_coding
SPCS2P4	-1.10316	5.53156e-05	1	processed_pseudogene
RPA2	-0.890299	5.53745e-05	1	protein_coding
HNRNPA2B1	-0.951976	5.56536e-05	1	protein_coding
MAGEF1	-0.888628	5.63984e-05	1	protein_coding
GMDS	-0.776515	5.6983e-05	1	protein_coding
E2F2	-1.11671	5.70145e-05	1	protein_coding
MIR1244-1	-1.03869	5.71429e-05	1	miRNA
L3HYPDH	-1.4517	5.73145e-05	1	protein_coding
CRYZL2P	-1.02274	5.86645e-05	1	transcribed_unitary_pseudogene
SCLY	-0.846959	5.91788e-05	1	protein_coding
LTB4R	-1.7689	6.04261e-05	1	protein_coding
HSD17B7	-1.23897	6.05838e-05	1	protein_coding
C22orf46	-1.82285	6.076e-05	1	unitary_pseudogene
TOE1	-1.00373	6.10406e-05	1	protein_coding
COA3	-0.975077	6.12578e-05	1	protein_coding
AL662844.4	-1.535	6.22157e-05	1	lncRNA
CHST12	-0.832101	6.22641e-05	1	protein_coding
AL021707.6	-2.83333	6.26946e-05	1	lncRNA
SPTLC3	-1.58896	6.28004e-05	1	protein_coding
ATP5MD	-1.04434	6.83963e-05	1	protein_coding
OXTR	-2.07774	6.87908e-05	1	protein_coding
AL662795.2	-2.07121	6.88629e-05	1	TEC
CCDC71	-0.903613	6.95531e-05	1	protein_coding
CCDC87	-4.12202	7.04023e-05	1	protein_coding
NCK1-DT	-1.56456	7.0522e-05	1	lncRNA
PEG13	-1.70258	7.10079e-05	1	lncRNA
SFN	-1.56621	7.139e-05	1	protein_coding
AP000769.1	-2.26901	7.21341e-05	1	transcribed_unprocessed_pseudogene
FASTKD1	-1.0523	7.25023e-05	1	protein_coding
WNK4	-1.68749	7.27262e-05	1	protein_coding
MAP3K11	-0.823846	7.2968e-05	1	protein_coding
LINC02600	-1.86954	7.39507e-05	1	lncRNA
CETN3	-0.798169	7.49654e-05	1	protein_coding
TFDP1	-0.999933	7.56587e-05	1	protein_coding
NANS	-0.812902	7.56649e-05	1	protein_coding
MT-TI	-2.37962	7.57704e-05	1	Mt_tRNA
TMEM203	-0.91656	7.60944e-05	1	protein_coding
SDHAF2	-0.696525	7.61984e-05	1	protein_coding
RPLP1P6	-4.14327	7.65728e-05	1	transcribed_processed_pseudogene
ZNF557	-1.20198	7.74026e-05	1	protein_coding
TFB2M	-0.674755	7.81083e-05	1	protein_coding
AL513165.1	-1.54136	7.82651e-05	1	lncRNA
FAM98A	-0.732782	7.85275e-05	1	protein_coding
PFKFB4	-1.68143	7.91077e-05	1	protein_coding
RNASEH2C	-0.795384	8.05917e-05	1	protein_coding
ZNF542P	-1.3322	8.17895e-05	1	transcribed_unprocessed_pseudogene
CDKN2C	-1.13502	8.2366e-05	1	protein_coding
MIR4700	-1.21913	8.39255e-05	1	miRNA
POLR2D	-0.699306	8.3929e-05	1	protein_coding
LYRM2	-0.883064	8.42193e-05	1	protein_coding
AL133215.2	-1.71716	8.4376e-05	1	lncRNA
AC130324.3	-2.07406	8.47442e-05	1	lncRNA
DNAJC3-DT	-1.64226	8.68543e-05	1	lncRNA
PSKH1	-0.970629	8.76667e-05	1	protein_coding
NT5DC2	-0.8558	8.88786e-05	1	protein_coding
TMEM45A	-1.32659	8.89761e-05	1	protein_coding
AC025165.3	-0.673461	8.93863e-05	1	protein_coding
MFSD14C	-0.959411	8.95614e-05	1	protein_coding
AC093297.2	-1.32685	9.12905e-05	1	lncRNA
MIR1244-3	-1.05464	9.21513e-05	1	miRNA
MYH3	-1.69913	9.23227e-05	1	protein_coding
TM4SF19-TCTEX1D2	-1.71872	9.26714e-05	1	protein_coding
NCBP2	-0.791551	9.30966e-05	1	protein_coding
TSSK6	-1.55543	9.35268e-05	1	protein_coding
ASRGL1	-1.04601	9.38073e-05	1	protein_coding
TYMSOS	-1.11375	9.4198e-05	1	lncRNA
FABP5P7	-1.04648	9.43842e-05	1	processed_pseudogene
TRUB2	-0.773009	9.5563e-05	1	protein_coding
ZBTB8OS	-1.06868	9.58184e-05	1	protein_coding
UBE2T	-0.910686	9.58541e-05	1	protein_coding
DDX39A	-0.795165	9.69728e-05	1	protein_coding
AC008763.2	-0.970105	9.84817e-05	1	protein_coding
SETMAR	-0.97573	9.94705e-05	1	protein_coding
SAFB	-0.881629	0.000100244	1	protein_coding
AC145207.5	-1.15468	0.00010173	1	lncRNA
STARD4	-1.24155	0.000101962	1	protein_coding
AP1M2	-1.14905	0.000103778	1	protein_coding
MMAB	-1.42846	0.000104815	1	protein_coding
IGFLR1	-0.901776	0.000106748	1	protein_coding
HSPB11	-0.970219	0.000107513	1	protein_coding
NSMCE3	-1.0229	0.000107868	1	protein_coding
HMGB3	-0.730825	0.000108654	1	protein_coding
DHFR	-0.874815	0.000109293	1	protein_coding
ZSCAN5A	-1.56602	0.00010953	1	protein_coding
AGPAT5	-0.755388	0.000110638	1	protein_coding
TMEM265	-1.57617	0.000112333	1	protein_coding
PREB	-0.810057	0.000112622	1	protein_coding
WAC-AS1	-1.11435	0.000113352	1	lncRNA
DNAJC22	-0.99466	0.000113666	1	protein_coding
ELMO3	-1.42362	0.000114	1	protein_coding
KIAA1143	-0.850497	0.000114561	1	protein_coding
AL441992.1	-1.4793	0.00011536	1	lncRNA
FAAP24	-0.897985	0.000115419	1	protein_coding
SLC38A11	-1.76583	0.000115656	1	protein_coding
SAMD10	-1.05407	0.000115982	1	protein_coding
RAD51	-0.815996	0.000116699	1	protein_coding
EPM2AIP1	-1.49909	0.000117295	1	protein_coding
FAHD1	-0.873307	0.000117665	1	protein_coding
CNPY4	-1.16284	0.000119564	1	protein_coding
LSM7	-0.78327	0.000123823	1	protein_coding
CHAF1A	-0.927239	0.000123892	1	protein_coding
RAB11B-AS1	-1.21884	0.000124066	1	lncRNA
ORAI2	-1.21822	0.000124081	1	protein_coding
POLR3K	-0.840812	0.000125346	1	protein_coding
AC102953.2	-3.64083	0.000128576	1	lncRNA
LYRM7	-1.01572	0.000129212	1	protein_coding
HSD17B2	-1.69965	0.000130639	1	protein_coding
UQCC1	-0.750305	0.000133024	1	protein_coding
EID2B	-1.20081	0.000133551	1	protein_coding
APOBEC3F	-1.71981	0.000134031	1	protein_coding
AC002310.2	-3.60036	0.000134367	1	lncRNA
BAIAP2-DT	-1.99972	0.000135739	1	lncRNA
DDX46	-0.990906	0.000137751	1	protein_coding
GNB1L	-1.26309	0.000138503	1	protein_coding
SLC18B1	-0.753668	0.000139321	1	protein_coding
NHP2	-0.746335	0.000139553	1	protein_coding
MIR1244-4	-1.6799	0.000142331	1	miRNA
TUBB1	-3.49369	0.00014333	1	protein_coding
S100A1	-0.872351	0.000144265	1	protein_coding
LINC02035	-2.22839	0.000145586	1	lncRNA
AC068338.3	-1.9676	0.000146031	1	lncRNA
CD3EAP	-0.836778	0.000146248	1	protein_coding
AL445524.1	-0.990438	0.000146392	1	lncRNA
PSMA3	-0.799284	0.000147495	1	protein_coding
AC012123.1	-1.63363	0.000148636	1	lncRNA
ZNF232	-1.28394	0.000148895	1	protein_coding
SPA17	-1.40955	0.000149171	1	protein_coding
SNRPF	-0.880302	0.000149967	1	protein_coding
ZBTB11-AS1	-1.18487	0.000150201	1	lncRNA
TCFL5	-0.818165	0.000152892	1	protein_coding
CDC26	-0.779523	0.000153009	1	protein_coding
MSH6	-0.831617	0.00015343	1	protein_coding
TRMT61B	-0.818476	0.00015405	1	protein_coding
SLC6A8	-0.873713	0.000154719	1	protein_coding
RBX1	-1.09472	0.000159224	1	protein_coding
FAM187A	-2.43495	0.000160639	1	protein_coding
SLC25A28	-0.854808	0.00016165	1	protein_coding
WASF1	-0.835872	0.000162211	1	protein_coding
TEFM	-0.877414	0.000163772	1	protein_coding
ZNF780B	-1.33602	0.000168558	1	protein_coding
SUMF1	-0.89347	0.000168635	1	protein_coding
C1orf159	-0.973031	0.000170085	1	protein_coding
DEGS1	-0.981759	0.000170676	1	protein_coding
MRFAP1L1	-0.745747	0.000170814	1	protein_coding
LZTFL1	-1.14197	0.00017171	1	protein_coding
TCEAL9	-0.848197	0.000171978	1	protein_coding
SSR3	-0.723852	0.000173171	1	protein_coding
AC027097.1	-1.63567	0.000173854	1	lncRNA
MSL3	-0.791026	0.000176567	1	protein_coding
AL441883.1	-1.29746	0.000176685	1	lncRNA
ZNF682	-1.66602	0.000177252	1	protein_coding
MIR210HG	-2.79859	0.000179164	1	lncRNA
U62317.2	-1.74734	0.000180786	1	lncRNA
RMDN2	-1.66694	0.00018099	1	protein_coding
AF196969.1	-0.916308	0.000181321	1	protein_coding
AC015813.2	-0.873454	0.000181711	1	protein_coding
ZNF321P	-1.86182	0.000182997	1	transcribed_processed_pseudogene
MAT2A	-1.19669	0.000183918	1	protein_coding
CEBPA-DT	-1.03252	0.00018468	1	lncRNA
OIP5	-0.838351	0.000185941	1	protein_coding
MMACHC	-1.648	0.000186958	1	protein_coding
ZNF594	-1.48036	0.000187114	1	protein_coding
CHCHD1	-0.867207	0.000187431	1	protein_coding
AC020915.5	-0.699885	0.000187442	1	protein_coding
EID2	-0.766313	0.000187969	1	protein_coding
SLC35B4	-0.889685	0.000188616	1	protein_coding
LSS	-1.04182	0.000190914	1	protein_coding
AC037459.3	-2.81971	0.000191134	1	lncRNA
MON1B	-0.762571	0.000192557	1	protein_coding
ALDOC	-1.03102	0.000200316	1	protein_coding
TMEM104	-0.801575	0.000200522	1	protein_coding
TREX1	-2.76872	0.000201061	1	protein_coding
C6orf203	-1.17602	0.000201707	1	protein_coding
TMEM141	-0.872934	0.000202529	1	protein_coding
RUVBL1	-0.892581	0.000207542	1	protein_coding
C6orf47-AS1	-4.85569	0.000211598	1	lncRNA
FAM89B	-0.828425	0.000214706	1	protein_coding
ACTR3B	-0.931078	0.000215429	1	protein_coding
ZNF347	-1.76307	0.000215738	1	protein_coding
FAM86C2P	-1.43883	0.000215775	1	transcribed_unprocessed_pseudogene
CENPI	-1.23048	0.000217291	1	protein_coding
NRTN	-0.888306	0.000217394	1	protein_coding
LINC01311	-1.60847	0.000218532	1	lncRNA
AL109613.1	-1.1818	0.000220334	1	lncRNA
TENT5A	-1.03213	0.000221145	1	protein_coding
KNOP1	-0.792424	0.000226941	1	protein_coding
TMEM170B	-1.02019	0.000229398	1	protein_coding
AL359183.1	-1.36041	0.000230373	1	TEC
NPSR1-AS1	-1.5697	0.000230421	1	lncRNA
GPR153	-1.90264	0.000230793	1	protein_coding
PRKAR1B	-0.792536	0.000232611	1	protein_coding
ST3GAL2	-0.769665	0.000234217	1	protein_coding
AP002360.1	-1.11539	0.000238045	1	lncRNA
AC006011.1	-0.726066	0.000240001	1	processed_pseudogene
ALG14	-0.923012	0.000241303	1	protein_coding
FAM32A	-0.708689	0.000241331	1	protein_coding
HSP90AA1	-1.40751	0.000241362	1	protein_coding
SLC27A5	-0.835262	0.0002425	1	protein_coding
EXOC7	-0.711882	0.000242995	1	protein_coding
CANT1	-0.77397	0.000245287	1	protein_coding
FILIP1L	-1.17232	0.000246781	1	protein_coding
JOSD2	-1.02632	0.000252597	1	protein_coding
SLC25A25-AS1	-1.92341	0.000257011	1	lncRNA
LINC02313	-1.71501	0.000257707	1	lncRNA
AMMECR1	-1.15484	0.000259584	1	protein_coding
SLC35C1	-0.85797	0.000260486	1	protein_coding
C15orf62	-3.95666	0.000262057	1	protein_coding
B4GALT7	-0.8866	0.000264442	1	protein_coding
UNG	-0.830675	0.000269386	1	protein_coding
CTBP1-DT	-1.12583	0.000271449	1	lncRNA
HPR	-1.56045	0.000271814	1	protein_coding
LINC01146	-1.5624	0.000272595	1	lncRNA
TK1	-1.08906	0.000275715	1	protein_coding
ZNF749	-0.780959	0.000278602	1	protein_coding
CACYBP	-0.83705	0.000280474	1	protein_coding
MRPL51	-0.730054	0.000282744	1	protein_coding
ITGA9-AS1	-1.71257	0.000284506	1	lncRNA
FBXL19	-1.11884	0.000287223	1	protein_coding
MT-TT	-2.57599	0.000287777	1	Mt_tRNA
CLIC1	-0.769937	0.000290569	1	protein_coding
AL133353.1	-2.10337	0.00029245	1	lncRNA
SLC38A10	-0.690912	0.00029339	1	protein_coding
RDH5	-1.34698	0.000298882	1	protein_coding
TLNRD1	-0.777444	0.000298999	1	protein_coding
AL049840.4	-1.04724	0.000300363	1	lncRNA
NDUFAF1	-0.766427	0.000300841	1	protein_coding
ZNF646	-0.817251	0.000301857	1	protein_coding
PSMG4	-0.782261	0.000303408	1	protein_coding
CCM2	-0.862154	0.000304323	1	protein_coding
FAM122B	-0.985571	0.000305534	1	protein_coding
AC023157.3	-1.98723	0.000307449	1	lncRNA
LSM6	-0.791421	0.000308959	1	protein_coding
PPP2R2C	-2.7167	0.00031501	1	protein_coding
SLC36A4	-1.01863	0.000316049	1	protein_coding
AL050341.2	-1.22805	0.000316572	1	lncRNA
AC011468.5	-1.75214	0.000318477	1	lncRNA
AL356488.3	-2.53265	0.000318714	1	lncRNA
AC018553.1	-1.65591	0.000319135	1	lncRNA
C8orf59	-1.17359	0.000320988	1	protein_coding
AC020915.1	-0.692125	0.000325625	1	lncRNA
MEGF8	-0.934581	0.000325934	1	protein_coding
OLMALINC	-1.34522	0.000326287	1	lncRNA
ARGLU1	-0.91719	0.000327556	1	protein_coding
ZFHX2-AS1	-0.868205	0.000327593	1	lncRNA
AMDHD1	-1.15424	0.000328073	1	protein_coding
TMEM177	-0.710777	0.000328561	1	protein_coding
CCDC103	-2.45538	0.000329544	1	protein_coding
ZNF530	-1.45116	0.000330857	1	protein_coding
FADS1	-1.13361	0.000331189	1	protein_coding
ANGPTL1	-2.33872	0.000332185	1	protein_coding
TRIM27	-0.873785	0.000332383	1	protein_coding
BRCC3	-0.864619	0.000336481	1	protein_coding
C1RL	-0.951208	0.000344503	1	protein_coding
AL121832.2	-0.970844	0.000353909	1	lncRNA
NCBP2-AS2	-0.905401	0.000354215	1	protein_coding
PM20D2	-0.719239	0.000355035	1	protein_coding
RRM2	-0.975097	0.000358049	1	protein_coding
AIFM3	-0.877054	0.000358059	1	protein_coding
U47924.2	-3.54662	0.000359084	1	lncRNA
SNORA50C	-1.54497	0.000359572	1	snoRNA
TPM3P6	-2.26865	0.000360417	1	processed_pseudogene
BCL2L2-PABPN1	-0.959572	0.000361654	1	protein_coding
DICER1-AS1	-2.02828	0.0003621	1	lncRNA
ING4	-0.878856	0.000365512	1	protein_coding
SRSF1	-0.856691	0.000367119	1	protein_coding
LDHA	-0.892466	0.000367477	1	protein_coding
POU4F1	-1.84865	0.000367924	1	protein_coding
MIS12	-0.81443	0.000370217	1	protein_coding
ITGB3BP	-1.011	0.000370836	1	protein_coding
C1GALT1C1L	-1.80839	0.000373279	1	protein_coding
PRKACB	-1.1823	0.000373339	1	protein_coding
AARS2	-0.928574	0.000376396	1	protein_coding
TTC32	-1.41682	0.000378395	1	protein_coding
MOCS3	-1.03247	0.000379894	1	protein_coding
AC022075.1	-1.5904	0.000383057	1	lncRNA
PEX10	-0.819183	0.000384097	1	protein_coding
SALL2	-1.25617	0.000387736	1	protein_coding
TEAD2	-1.04609	0.000388782	1	protein_coding
SMIM8	-1.06388	0.000390241	1	protein_coding
PCLAF	-0.945531	0.000391556	1	protein_coding
BIRC5	-0.666656	0.0003951	1	protein_coding
MLYCD	-0.921007	0.000395886	1	protein_coding
CYP27B1	-0.893579	0.00040256	1	protein_coding
SNRPE	-0.700791	0.00041064	1	protein_coding
TRMT12	-0.837067	0.000410894	1	protein_coding
ZNF101	-1.14336	0.000413011	1	protein_coding
TUSC8	-1.62828	0.000416279	1	lncRNA
PPP1R3G	-1.68671	0.000421781	1	protein_coding
SLC17A9	-0.832302	0.000423646	1	protein_coding
DSCC1	-0.774992	0.000428668	1	protein_coding
NRGN	-1.21768	0.000428726	1	protein_coding
PLSCR4	-1.95933	0.000428938	1	protein_coding
AC022336.2	-5.65648	0.000432489	1	lncRNA
EMILIN2	-0.728653	0.000432902	1	protein_coding
SNAI3-AS1	-1.68691	0.00044154	1	lncRNA
FADS2	-1.2747	0.000442101	1	protein_coding
AC083964.1	-2.12379	0.000443057	1	lncRNA
ZBTB22	-0.879477	0.000443739	1	protein_coding
THPO	-1.09986	0.000446603	1	protein_coding
AC067750.1	-1.85239	0.000447619	1	lncRNA
LDLRAD3	-1.72646	0.000451075	1	protein_coding
SOD1	-0.713367	0.00045244	1	protein_coding
ERVK3-1	-0.753749	0.00045253	1	protein_coding
ZNF22	-2.0647	0.000452849	1	protein_coding
ZNF781	-1.56888	0.000455208	1	protein_coding
RF00407	-1.52545	0.000455467	1	snoRNA
FKBPL	-1.19912	0.000460926	1	protein_coding
ITGA2	-1.03975	0.000461421	1	protein_coding
TRIM41	-0.844896	0.000461996	1	protein_coding
AC115619.1	-1.91913	0.000462861	1	lncRNA
ATP5MPL	-0.736732	0.000464959	1	protein_coding
ZNF480	-1.06905	0.00046553	1	protein_coding
MCRIP2P1	-2.18927	0.000466425	1	processed_pseudogene
ZNF283	-1.03676	0.000473665	1	protein_coding
RAD51C	-0.732263	0.00047439	1	protein_coding
BCDIN3D	-1.36307	0.000476186	1	protein_coding
RASL10B	-0.94243	0.000477943	1	protein_coding
ZNF346	-0.74646	0.000481576	1	protein_coding
C3orf62	-1.78705	0.000481989	1	protein_coding
AC004816.1	-1.17101	0.000483089	1	lncRNA
MINCR	-1.02907	0.000491324	1	lncRNA
RWDD2A	-1.15271	0.000491634	1	protein_coding
AL163636.2	-1.15564	0.000493015	1	protein_coding
DBI	-1.29724	0.000495462	1	protein_coding
GABPB1-AS1	-0.983129	0.000511584	1	lncRNA
MANCR	-3.39582	0.000513625	1	lncRNA
B4GALT2	-0.677896	0.000517174	1	protein_coding
UEVLD	-1.00357	0.000517411	1	protein_coding
AC003002.2	-0.833815	0.000517954	1	protein_coding
AC008764.6	-1.87324	0.000524464	1	lncRNA
CCNF	-0.808334	0.000525108	1	protein_coding
PIN4	-1.18971	0.000525301	1	protein_coding
ZBTB47	-1.40633	0.000538301	1	protein_coding
C19orf48	-0.853401	0.00053941	1	protein_coding
FIRRE	-1.18761	0.000541035	1	lncRNA
EEF2KMT	-0.641725	0.000544419	1	protein_coding
FAM162A	-0.893567	0.000550788	1	protein_coding
CEP41	-0.810284	0.000551652	1	protein_coding
BDH1	-1.15881	0.000555757	1	protein_coding
POP1	-0.842163	0.000556359	1	protein_coding
TUB	-1.33848	0.000558308	1	protein_coding
BBIP1	-0.941228	0.000562394	1	protein_coding
FLVCR1	-1.18918	0.000562984	1	protein_coding
CLSPN	-1.12366	0.000563274	1	protein_coding
PIP4K2B	-0.638273	0.00056359	1	protein_coding
NDRG2	-0.774724	0.000563894	1	protein_coding
MSTO1	-1.10153	0.00056496	1	protein_coding
MX2	-0.821561	0.000565103	1	protein_coding
AL731569.1	-1.30964	0.000565205	1	lncRNA
AC124947.2	-1.70057	0.000565702	1	transcribed_processed_pseudogene
AC107375.1	-1.94254	0.000580239	1	lncRNA
FOXN3-AS1	-1.17474	0.000581373	1	lncRNA
HNRNPH3	-0.824174	0.000585851	1	protein_coding
RPUSD2	-0.716731	0.000592282	1	protein_coding
EGFR-AS1	-1.03383	0.000598467	1	lncRNA
TMEM44	-1.05353	0.000598678	1	protein_coding
BNIP3	-0.779784	0.000601426	1	protein_coding
TRMT2B	-0.779264	0.000603718	1	protein_coding
C2orf72	-0.92144	0.000605481	1	protein_coding
AC022167.2	-0.761069	0.000606814	1	lncRNA
BHLHB9	-2.06681	0.000612142	1	protein_coding
AC084117.1	-2.69727	0.000614929	1	lncRNA
AC107027.3	-2.04106	0.000617179	1	lncRNA
CCNC	-0.667719	0.000621937	1	protein_coding
AL513550.1	-1.41519	0.000622904	1	lncRNA
AC097639.1	-1.51235	0.000640292	1	lncRNA
AC002310.1	-1.68904	0.000640454	1	lncRNA
TMCC1	-1.1509	0.000641958	1	protein_coding
RMI2	-0.954877	0.000642105	1	protein_coding
MICOS10	-0.770704	0.000646863	1	protein_coding
TSPAN10	-1.77944	0.000648042	1	protein_coding
UHRF1	-1.1101	0.000648382	1	protein_coding
MYDGF	-0.714161	0.000651684	1	protein_coding
CHCHD7	-0.661101	0.000654016	1	protein_coding
ING5	-0.594463	0.000654502	1	protein_coding
HSPE1P4	-2.00328	0.000657064	1	processed_pseudogene
CCNE2	-1.21912	0.000657589	1	protein_coding
CA9	-2.26798	0.000658803	1	protein_coding
EID1	-1.61587	0.000662373	1	protein_coding
ADCY10P1	-1.89045	0.000663318	1	transcribed_unprocessed_pseudogene
UTP3	-0.69561	0.000665768	1	protein_coding
ZNF404	-2.1349	0.000665835	1	protein_coding
CASC10	-0.933572	0.000671207	1	lncRNA
DUT	-0.710604	0.000671403	1	protein_coding
FKBP3	-0.760243	0.000674103	1	protein_coding
APOO	-0.699744	0.000675774	1	protein_coding
PIMREG	-0.874889	0.000677873	1	protein_coding
SUB1P3	-1.33482	0.000678651	1	processed_pseudogene
NDUFA2	-0.801588	0.000680711	1	protein_coding
DLG5-AS1	-1.88956	0.000681077	1	lncRNA
ZC3H10	-1.31724	0.000685398	1	protein_coding
ZFP41	-0.920747	0.000690886	1	protein_coding
PPP1R3E	-1.30537	0.000691064	1	protein_coding
DHCR7	-1.04956	0.000692295	1	protein_coding
ZNF417	-1.3052	0.000696603	1	protein_coding
ZNF546	-1.63532	0.000697356	1	protein_coding
MALT1	-0.682457	0.000698282	1	protein_coding
PRMT6	-0.830417	0.000700261	1	protein_coding
NDUFC2	-0.826892	0.000700468	1	protein_coding
C19orf25	-0.66147	0.000701556	1	protein_coding
AC007319.1	-1.39001	0.000706096	1	lncRNA
TNFSF9	-1.79236	0.000707382	1	protein_coding
DLX4	-2.21615	0.000707752	1	protein_coding
PGP	-0.786877	0.000712477	1	protein_coding
AL645933.2	-1.46847	0.000712706	1	lncRNA
WRAP53	-0.710623	0.000715137	1	protein_coding
AL354811.1	-1.67592	0.000717662	1	lncRNA
CLP1	-0.77244	0.000724257	1	protein_coding
CSTF2T	-1.19943	0.000729253	1	protein_coding
CENPBD1	-0.782157	0.000732096	1	protein_coding
FLVCR1-DT	-0.898002	0.0007369	1	lncRNA
FOXP4-AS1	-1.09017	0.000744907	1	lncRNA
PLGRKT	-0.875786	0.000749615	1	protein_coding
LINC00653	-3.39848	0.000758525	1	lncRNA
LINC00526	-0.927233	0.000758554	1	lncRNA
SIRT5	-0.831008	0.000762282	1	protein_coding
UBL5	-1.01331	0.000763614	1	protein_coding
TMEM70	-0.586713	0.00076856	1	protein_coding
LINC02413	-1.09647	0.000768757	1	lncRNA
AJM1	-0.914259	0.000774736	1	protein_coding
HMOX2	-0.712075	0.000776417	1	protein_coding
IMMP1L	-1.03481	0.000779048	1	protein_coding
L3MBTL1	-0.958469	0.000779401	1	protein_coding
RPP25	-2.07032	0.000781469	1	protein_coding
SCD	-1.17834	0.00079118	1	protein_coding
GEMIN7	-0.632123	0.000792511	1	protein_coding
RGMB-AS1	-1.39823	0.000793448	1	lncRNA
NBPF20	-1.35469	0.000794187	1	protein_coding
TSPEAR-AS1	-1.81291	0.00079611	1	lncRNA
SS18L2	-1.07174	0.000797425	1	protein_coding
TIMMDC1	-0.851282	0.000798852	1	protein_coding
KRI1	-0.819648	0.000799095	1	protein_coding
MORF4L2	-0.855461	0.000799839	1	protein_coding
HSPA5	-1.02905	0.000806186	1	protein_coding
FOXJ1	-1.19503	0.000806366	1	protein_coding
MTAP	-0.655482	0.000806433	1	protein_coding
AC010331.1	-1.49148	0.000808397	1	lncRNA
COPS9	-0.728828	0.000809274	1	protein_coding
UBAC2-AS1	-1.1502	0.000810172	1	lncRNA
ATG4B	-0.629086	0.000813197	1	protein_coding
FAM3C	-0.687728	0.000813905	1	protein_coding
AP001462.1	-2.27216	0.000817422	1	lncRNA
PYGO2	-0.619851	0.000820868	1	protein_coding
AL024507.2	-2.89375	0.000822457	1	lncRNA
RANBP6	-0.807026	0.000823075	1	protein_coding
STAT6	-0.743596	0.000827832	1	protein_coding
BNIP3L	-1.08668	0.00083096	1	protein_coding
MPI	-0.649184	0.000848139	1	protein_coding
NDUFS5	-0.761582	0.00084855	1	protein_coding
CDKN2B	-1.87773	0.000852519	1	protein_coding
MRPL36	-0.732578	0.00085635	1	protein_coding
RTL10	-0.702113	0.000860611	1	protein_coding
RABL2B	-0.978647	0.000863082	1	protein_coding
GSTA4	-0.892306	0.000872703	1	protein_coding
AC027644.3	-1.00969	0.000874681	1	lncRNA
SPC24	-0.830182	0.000886106	1	protein_coding
SFT2D3	-0.689965	0.000900692	1	protein_coding
RNASE4	-1.1645	0.000901822	1	protein_coding
ZBTB45	-0.919274	0.000902366	1	protein_coding
MCEE	-1.16785	0.000913177	1	protein_coding
AC008771.1	-1.17216	0.000913567	1	lncRNA
DBH-AS1	-1.91479	0.000921592	1	lncRNA
BRD3OS	-1.34284	0.000926765	1	protein_coding
ST7-AS1	-1.48372	0.000931331	1	lncRNA
TRIM2	-1.09101	0.000940047	1	protein_coding
C6orf120	-0.624632	0.000942986	1	protein_coding
GPATCH4	-0.840384	0.000946314	1	protein_coding
NCLN	-0.76083	0.000947249	1	protein_coding
SULT1A1	-0.690672	0.0009503	1	protein_coding
GSTO2	-1.14667	0.000950578	1	protein_coding
AL365205.1	-0.860764	0.000954215	1	protein_coding
NUDC	-0.82427	0.000955233	1	protein_coding
SLC25A29	-0.998269	0.000960187	1	protein_coding
HS1BP3-IT1	-0.86973	0.000961037	1	lncRNA
AC009309.1	-1.84631	0.000966071	1	lncRNA
MRPS7	-0.643811	0.000969434	1	protein_coding
HMGB1	-0.77709	0.000979139	1	protein_coding
HIST1H2BG	-2.11653	0.000979673	1	protein_coding
TSPAN8	-1.26526	0.00098813	1	protein_coding
DCTPP1	-0.670469	0.000991779	1	protein_coding
AL137785.1	-2.18996	0.000991877	1	lncRNA

## Sheet: HepG2_Downregulated < -1,5
Gene name	LogFC	pValue	FDR	Biotype
HSPA1A	-3.16367	2.31692e-24	4.90259e-20	protein_coding
EPOP	-2.56534	3.64283e-22	7.70714e-18	protein_coding
AP001505.1	-2.79005	1.37801e-17	2.91464e-13	lncRNA
NFE2	-2.59587	2.58537e-17	5.46728e-13	protein_coding
AL365181.3	-2.12271	1.56514e-16	3.30917e-12	lncRNA
FBXO9	-1.92965	1.78479e-16	3.77341e-12	protein_coding
HSPA8	-2.42162	2.64448e-16	5.5899e-12	protein_coding
FEN1	-2.09375	1.25304e-15	2.64817e-11	protein_coding
ZNF629	-1.941	4.5441e-15	9.60078e-11	protein_coding
AC074117.1	-1.57082	2.36786e-14	5.00115e-10	lncRNA
ILF3-DT	-2.29573	2.74551e-14	5.79853e-10	lncRNA
DNAJA1	-1.80302	3.17039e-14	6.69554e-10	protein_coding
C1QTNF1-AS1	-3.21291	6.88424e-14	1.45354e-09	lncRNA
ADAT3	-1.54729	1.64008e-13	3.46206e-09	protein_coding
HSPA1B	-2.52423	2.88179e-13	6.0823e-09	protein_coding
DGCR8	-1.86918	2.93364e-13	6.19145e-09	protein_coding
RAB42	-2.25612	4.42193e-13	9.33116e-09	protein_coding
GINS1	-1.80204	7.17579e-13	1.51409e-08	protein_coding
NARF	-1.6139	8.58913e-13	1.81222e-08	protein_coding
LINC02119	-4.14622	1.06795e-12	2.25305e-08	lncRNA
FAM111B	-2.4574	2.49946e-12	5.27137e-08	protein_coding
ELMOD2	-1.57467	3.10348e-12	6.54214e-08	protein_coding
IDI1	-2.49305	9.63784e-12	2.03069e-07	protein_coding
ENDOV	-1.54467	1.73116e-11	3.64633e-07	protein_coding
HSPE1	-1.86833	4.99513e-11	1.05172e-06	protein_coding
APOL2	-1.8421	7.4106e-11	1.56e-06	protein_coding
GEMIN6	-1.61753	8.00721e-11	1.68544e-06	protein_coding
PAQR4	-1.61457	1.93233e-10	4.06525e-06	protein_coding
MTERF2	-1.56584	2.09761e-10	4.41274e-06	protein_coding
ZBED8	-2.11179	2.46255e-10	5.17948e-06	protein_coding
MANF	-1.5615	4.70727e-10	9.89515e-06	protein_coding
TGFBR3	-1.69068	4.8984e-10	1.02959e-05	protein_coding
C1orf216	-3.1832	6.34984e-10	1.33442e-05	protein_coding
AC012065.3	-1.72782	6.39113e-10	1.34297e-05	lncRNA
TMPO-AS1	-2.77525	6.98329e-10	1.46733e-05	lncRNA
IGFBP1	-2.32899	7.72013e-10	1.62185e-05	protein_coding
PYCR3	-1.99412	1.29613e-09	2.7211e-05	protein_coding
NAPRT	-1.86705	1.72673e-09	3.62423e-05	protein_coding
MED31	-1.94334	1.96037e-09	4.11422e-05	protein_coding
ASF1B	-1.73055	2.00017e-09	4.19735e-05	protein_coding
AL118506.1	-2.16378	2.20626e-09	4.62917e-05	lncRNA
TRIM56	-1.54785	2.36913e-09	4.97067e-05	protein_coding
SAA4	-1.84005	2.67503e-09	5.61167e-05	protein_coding
AL450998.2	-1.70873	2.80079e-09	5.87522e-05	lncRNA
P2RY11	-2.27639	3.11699e-09	6.53727e-05	protein_coding
LINC00909	-1.60867	5.22524e-09	0.000109521	lncRNA
AP001972.5	-2.18996	5.96585e-09	0.000125014	TEC
MAGEH1	-3.08583	6.41136e-09	0.000134324	protein_coding
PELI3	-1.71748	6.90266e-09	0.000144597	protein_coding
AC009118.2	-2.66803	6.91399e-09	0.000144827	lncRNA
LNP1	-1.75779	7.04021e-09	0.000147457	protein_coding
SAA2-SAA4	-1.83258	7.79423e-09	0.000163242	protein_coding
AC068631.3	-1.80801	1.06843e-08	0.000223655	processed_pseudogene
PART1	-2.63748	1.17997e-08	0.000246955	lncRNA
AC012313.1	-1.89323	1.27476e-08	0.000266769	lncRNA
CLDN2	-2.20267	1.34494e-08	0.000281402	protein_coding
AL135905.1	-2.36905	1.84224e-08	0.000385084	lncRNA
EXOC3-AS1	-2.04737	1.93594e-08	0.000404631	lncRNA
PET100	-1.56544	1.95014e-08	0.00040756	protein_coding
LINC01521	-2.56851	1.98883e-08	0.000415626	lncRNA
NANOS1	-2.2793	2.16856e-08	0.0004531	protein_coding
AL161772.1	-1.67369	2.29275e-08	0.000479002	lncRNA
KDM7A-DT	-1.55866	2.3793e-08	0.000497012	lncRNA
AC015982.1	-2.09916	2.42259e-08	0.000506006	lncRNA
TPM3P9	-1.85533	2.51868e-08	0.000526027	transcribed_processed_pseudogene
OPN3	-1.68301	2.90117e-08	0.000605647	protein_coding
LDLR	-1.72612	4.10614e-08	0.000856418	protein_coding
ZNF747	-1.83864	4.83646e-08	0.0010084	protein_coding
LPAR6	-1.5637	5.00621e-08	0.00104364	protein_coding
LINC02001	-1.80013	5.45507e-08	0.00113705	lncRNA
GDF11	-1.53982	6.58584e-08	0.00137249	protein_coding
SLC6A14	-2.43723	7.50712e-08	0.00156373	protein_coding
ZNF514	-1.71252	7.66459e-08	0.00159646	protein_coding
SLC2A10	-2.11482	8.8745e-08	0.00184758	protein_coding
CSTF3	-1.67955	1.05448e-07	0.00219468	protein_coding
EMP2	-1.87791	1.1817e-07	0.00245875	protein_coding
IPO5P1	-2.7723	1.25245e-07	0.0026056	transcribed_processed_pseudogene
AC016394.2	-1.98111	1.2536e-07	0.00260787	lncRNA
LINC00205	-1.71145	1.60873e-07	0.00334488	lncRNA
MIR671	-1.71178	1.72859e-07	0.00359306	miRNA
AC096677.2	-1.57872	1.82747e-07	0.00379785	lncRNA
AC015813.5	-3.21795	2.03662e-07	0.00423088	TEC
HOXD1	-3.84847	2.46301e-07	0.00511494	protein_coding
AL928654.1	-2.28547	2.57083e-07	0.00533859	lncRNA
RF02160	-3.33664	2.76164e-07	0.00573427	misc_RNA
LINC01134	-2.38775	2.85384e-07	0.00592485	lncRNA
SNHG10	-1.51015	2.90161e-07	0.00602346	lncRNA
AMIGO3	-2.48132	3.05479e-07	0.00633961	protein_coding
MVD	-1.63513	3.18679e-07	0.00661194	protein_coding
DDN	-2.82525	3.293e-07	0.00683132	protein_coding
EMC3-AS1	-2.18743	3.49787e-07	0.00725494	transcribed_unprocessed_pseudogene
AC026304.1	-2.21394	4.06256e-07	0.00841966	lncRNA
SQLE	-1.83634	4.08277e-07	0.00846114	protein_coding
CCR6	-2.0021	5.32409e-07	0.0110219	protein_coding
MSMO1	-1.83766	5.838e-07	0.0120829	protein_coding
FBXL19-AS1	-2.75034	6.19448e-07	0.0128145	lncRNA
LCMT2	-1.68912	6.32239e-07	0.0130779	protein_coding
PCOLCE2	-1.51023	6.64597e-07	0.0137439	protein_coding
SNX22	-2.19457	6.72341e-07	0.0139033	protein_coding
RAB30-AS1	-1.5557	6.81071e-07	0.0140818	lncRNA
GPLD1	-1.8512	6.99447e-07	0.0144604	protein_coding
AC011498.7	-3.61446	7.60591e-07	0.0157199	TEC
AC018647.2	-1.81776	8.00533e-07	0.0165398	lncRNA
AC019069.1	-1.60916	8.3653e-07	0.0172827	lncRNA
OGFRP1	-2.34442	8.5385e-07	0.0176388	lncRNA
CD47	-2.29358	9.05396e-07	0.0186928	protein_coding
HSPE1P2	-2.31557	9.08305e-07	0.018752	processed_pseudogene
FAM43B	-1.69858	1.048e-06	0.0216244	protein_coding
AC023509.3	-2.97812	1.27033e-06	0.0261879	lncRNA
C21orf58	-2.3172	1.27964e-06	0.026376	protein_coding
AC092171.5	-1.53309	1.28868e-06	0.026561	lncRNA
NES	-1.75135	1.29013e-06	0.0265896	protein_coding
AC124067.4	-1.70182	1.41742e-06	0.0292059	lncRNA
DUXAP8	-1.70617	1.43187e-06	0.0294993	lncRNA
DUXAP8	-1.70617	1.43187e-06	0.0294993	transcribed_processed_pseudogene
WDR92	-1.58672	1.45064e-06	0.0298803	protein_coding
Z95115.1	-1.82602	1.5971e-06	0.0328714	lncRNA
AC142472.1	-2.70145	1.73269e-06	0.0356467	lncRNA
AC124798.1	-1.68715	1.74425e-06	0.0358827	lncRNA
AC114271.1	-2.28735	1.94968e-06	0.0400777	lncRNA
AC012510.1	-2.66546	2.47598e-06	0.0508245	lncRNA
ZNF559	-1.59622	2.84213e-06	0.0583121	protein_coding
AC009113.1	-2.72149	2.89963e-06	0.059483	lncRNA
AC005329.1	-2.72259	3.3518e-06	0.0686851	lncRNA
DDN-AS1	-2.22544	3.5708e-06	0.0731408	lncRNA
AP001160.3	-2.60967	3.74649e-06	0.0767168	lncRNA
DEPP1	-1.99214	4.01975e-06	0.0822682	protein_coding
TIGD1	-1.63264	4.1795e-06	0.0855335	protein_coding
TMEM147-AS1	-2.18725	4.62401e-06	0.0945841	lncRNA
LINC00449	-3.83544	4.77064e-06	0.0975501	lncRNA
TMEM121	-1.83675	4.99536e-06	0.102115	protein_coding
AC012360.3	-1.82428	5.34149e-06	0.109148	lncRNA
C17orf100	-1.66857	5.58109e-06	0.113988	protein_coding
PURPL	-1.71217	5.64661e-06	0.115321	lncRNA
LINC01124	-1.78621	5.93051e-06	0.121095	lncRNA
ITPRIPL1	-1.65325	6.15771e-06	0.125685	protein_coding
AL391244.2	-1.64695	6.17215e-06	0.125974	lncRNA
AC125807.2	-1.90617	6.2093e-06	0.126726	lncRNA
AC068338.2	-2.23244	6.28331e-06	0.128205	lncRNA
AGR2	-1.88163	6.51044e-06	0.1328	protein_coding
AL035461.2	-2.72791	6.61673e-06	0.134942	lncRNA
TTC30A	-2.13956	7.1501e-06	0.145762	protein_coding
CSRP2	-1.56467	7.74909e-06	0.157857	protein_coding
CASTOR3	-1.53775	8.02896e-06	0.16351	protein_coding
HMGCS1	-1.79534	8.73808e-06	0.177846	protein_coding
LINC01694	-2.12626	8.82827e-06	0.179655	lncRNA
AC004812.2	-1.84742	8.94308e-06	0.181974	lncRNA
HAGLR	-1.85159	9.60155e-06	0.195305	lncRNA
TRIM52	-1.91247	1.02617e-05	0.208619	protein_coding
VASH1-AS1	-2.06304	1.20148e-05	0.244021	lncRNA
MAFG-DT	-1.5681	1.23396e-05	0.250544	lncRNA
EME2	-1.52706	1.26723e-05	0.257223	protein_coding
C1orf116	-3.6456	1.47977e-05	0.300053	protein_coding
TMCC1-AS1	-1.97615	1.56009e-05	0.316199	lncRNA
APCDD1	-3.12162	1.70587e-05	0.345626	protein_coding
AL391832.2	-2.4751	1.85236e-05	0.374917	lncRNA
LINC02535	-2.39541	2.00445e-05	0.405361	lncRNA
KRT8P12	-2.36141	2.14904e-05	0.434385	transcribed_processed_pseudogene
AC083880.1	-1.90253	2.21353e-05	0.447332	lncRNA
AC021242.3	-2.38795	2.2257e-05	0.44977	lncRNA
ZNF213-AS1	-1.58831	2.6158e-05	0.52779	lncRNA
CCL20	-1.5967	2.72622e-05	0.54996	protein_coding
SOD2-OT1	-2.75037	2.7438e-05	0.553453	lncRNA
AC008438.1	-1.91999	2.74945e-05	0.554564	lncRNA
UFSP1	-1.69852	2.78608e-05	0.561925	protein_coding
RPS20P21	-2.90939	3.25322e-05	0.655264	processed_pseudogene
AC025449.1	-2.33491	3.53666e-05	0.711929	processed_pseudogene
APOL1	-1.54575	3.65755e-05	0.735972	protein_coding
CFAP44	-2.15725	3.72336e-05	0.749029	protein_coding
PIK3R3	-2.1151	3.78305e-05	0.760847	protein_coding
AL121658.1	-2.01999	3.84024e-05	0.772118	lncRNA
AC016405.3	-1.75707	4.05044e-05	0.813814	lncRNA
ZNF37BP	-1.76487	4.37324e-05	0.87806	transcribed_processed_pseudogene
AC064836.3	-2.06036	4.46828e-05	0.896829	lncRNA
MIMT1	-1.6402	4.54967e-05	0.912892	lncRNA
AC006449.6	-1.67288	4.83931e-05	0.970476	lncRNA
AC104113.1	-2.06006	5.00727e-05	1	lncRNA
CCDC102B	-2.22699	5.29366e-05	1	protein_coding
AP003392.4	-2.59702	5.41474e-05	1	lncRNA
LTB4R	-1.7689	6.04261e-05	1	protein_coding
C22orf46	-1.82285	6.076e-05	1	unitary_pseudogene
AL662844.4	-1.535	6.22157e-05	1	lncRNA
AL021707.6	-2.83333	6.26946e-05	1	lncRNA
SPTLC3	-1.58896	6.28004e-05	1	protein_coding
OXTR	-2.07774	6.87908e-05	1	protein_coding
AL662795.2	-2.07121	6.88629e-05	1	TEC
CCDC87	-4.12202	7.04023e-05	1	protein_coding
NCK1-DT	-1.56456	7.0522e-05	1	lncRNA
PEG13	-1.70258	7.10079e-05	1	lncRNA
SFN	-1.56621	7.139e-05	1	protein_coding
AP000769.1	-2.26901	7.21341e-05	1	transcribed_unprocessed_pseudogene
WNK4	-1.68749	7.27262e-05	1	protein_coding
LINC02600	-1.86954	7.39507e-05	1	lncRNA
MT-TI	-2.37962	7.57704e-05	1	Mt_tRNA
RPLP1P6	-4.14327	7.65728e-05	1	transcribed_processed_pseudogene
AL513165.1	-1.54136	7.82651e-05	1	lncRNA
PFKFB4	-1.68143	7.91077e-05	1	protein_coding
AL133215.2	-1.71716	8.4376e-05	1	lncRNA
AC130324.3	-2.07406	8.47442e-05	1	lncRNA
DNAJC3-DT	-1.64226	8.68543e-05	1	lncRNA
MYH3	-1.69913	9.23227e-05	1	protein_coding
TM4SF19-TCTEX1D2	-1.71872	9.26714e-05	1	protein_coding
TSSK6	-1.55543	9.35268e-05	1	protein_coding
ZSCAN5A	-1.56602	0.00010953	1	protein_coding
TMEM265	-1.57617	0.000112333	1	protein_coding
SLC38A11	-1.76583	0.000115656	1	protein_coding
AC102953.2	-3.64083	0.000128576	1	lncRNA
HSD17B2	-1.69965	0.000130639	1	protein_coding
APOBEC3F	-1.71981	0.000134031	1	protein_coding
AC002310.2	-3.60036	0.000134367	1	lncRNA
BAIAP2-DT	-1.99972	0.000135739	1	lncRNA
MIR1244-4	-1.6799	0.000142331	1	miRNA
TUBB1	-3.49369	0.00014333	1	protein_coding
LINC02035	-2.22839	0.000145586	1	lncRNA
AC068338.3	-1.9676	0.000146031	1	lncRNA
AC012123.1	-1.63363	0.000148636	1	lncRNA
FAM187A	-2.43495	0.000160639	1	protein_coding
AC027097.1	-1.63567	0.000173854	1	lncRNA
ZNF682	-1.66602	0.000177252	1	protein_coding
MIR210HG	-2.79859	0.000179164	1	lncRNA
U62317.2	-1.74734	0.000180786	1	lncRNA
RMDN2	-1.66694	0.00018099	1	protein_coding
ZNF321P	-1.86182	0.000182997	1	transcribed_processed_pseudogene
MMACHC	-1.648	0.000186958	1	protein_coding
AC037459.3	-2.81971	0.000191134	1	lncRNA
TREX1	-2.76872	0.000201061	1	protein_coding
C6orf47-AS1	-4.85569	0.000211598	1	lncRNA
ZNF347	-1.76307	0.000215738	1	protein_coding
LINC01311	-1.60847	0.000218532	1	lncRNA
NPSR1-AS1	-1.5697	0.000230421	1	lncRNA
GPR153	-1.90264	0.000230793	1	protein_coding
SLC25A25-AS1	-1.92341	0.000257011	1	lncRNA
LINC02313	-1.71501	0.000257707	1	lncRNA
C15orf62	-3.95666	0.000262057	1	protein_coding
HPR	-1.56045	0.000271814	1	protein_coding
LINC01146	-1.5624	0.000272595	1	lncRNA
ITGA9-AS1	-1.71257	0.000284506	1	lncRNA
MT-TT	-2.57599	0.000287777	1	Mt_tRNA
AL133353.1	-2.10337	0.00029245	1	lncRNA
AC023157.3	-1.98723	0.000307449	1	lncRNA
PPP2R2C	-2.7167	0.00031501	1	protein_coding
AC011468.5	-1.75214	0.000318477	1	lncRNA
AL356488.3	-2.53265	0.000318714	1	lncRNA
AC018553.1	-1.65591	0.000319135	1	lncRNA
CCDC103	-2.45538	0.000329544	1	protein_coding
ANGPTL1	-2.33872	0.000332185	1	protein_coding
U47924.2	-3.54662	0.000359084	1	lncRNA
SNORA50C	-1.54497	0.000359572	1	snoRNA
TPM3P6	-2.26865	0.000360417	1	processed_pseudogene
DICER1-AS1	-2.02828	0.0003621	1	lncRNA
POU4F1	-1.84865	0.000367924	1	protein_coding
C1GALT1C1L	-1.80839	0.000373279	1	protein_coding
AC022075.1	-1.5904	0.000383057	1	lncRNA
TUSC8	-1.62828	0.000416279	1	lncRNA
PPP1R3G	-1.68671	0.000421781	1	protein_coding
PLSCR4	-1.95933	0.000428938	1	protein_coding
AC022336.2	-5.65648	0.000432489	1	lncRNA
SNAI3-AS1	-1.68691	0.00044154	1	lncRNA
AC083964.1	-2.12379	0.000443057	1	lncRNA
AC067750.1	-1.85239	0.000447619	1	lncRNA
LDLRAD3	-1.72646	0.000451075	1	protein_coding
ZNF22	-2.0647	0.000452849	1	protein_coding
ZNF781	-1.56888	0.000455208	1	protein_coding
RF00407	-1.52545	0.000455467	1	snoRNA
AC115619.1	-1.91913	0.000462861	1	lncRNA
MCRIP2P1	-2.18927	0.000466425	1	processed_pseudogene
C3orf62	-1.78705	0.000481989	1	protein_coding
MANCR	-3.39582	0.000513625	1	lncRNA
AC008764.6	-1.87324	0.000524464	1	lncRNA
AC124947.2	-1.70057	0.000565702	1	transcribed_processed_pseudogene
AC107375.1	-1.94254	0.000580239	1	lncRNA
BHLHB9	-2.06681	0.000612142	1	protein_coding
AC084117.1	-2.69727	0.000614929	1	lncRNA
AC107027.3	-2.04106	0.000617179	1	lncRNA
AC097639.1	-1.51235	0.000640292	1	lncRNA
AC002310.1	-1.68904	0.000640454	1	lncRNA
TSPAN10	-1.77944	0.000648042	1	protein_coding
HSPE1P4	-2.00328	0.000657064	1	processed_pseudogene
CA9	-2.26798	0.000658803	1	protein_coding
EID1	-1.61587	0.000662373	1	protein_coding
ADCY10P1	-1.89045	0.000663318	1	transcribed_unprocessed_pseudogene
ZNF404	-2.1349	0.000665835	1	protein_coding
DLG5-AS1	-1.88956	0.000681077	1	lncRNA
ZNF546	-1.63532	0.000697356	1	protein_coding
TNFSF9	-1.79236	0.000707382	1	protein_coding
DLX4	-2.21615	0.000707752	1	protein_coding
AL354811.1	-1.67592	0.000717662	1	lncRNA
LINC00653	-3.39848	0.000758525	1	lncRNA
RPP25	-2.07032	0.000781469	1	protein_coding
TSPEAR-AS1	-1.81291	0.00079611	1	lncRNA
AP001462.1	-2.27216	0.000817422	1	lncRNA
AL024507.2	-2.89375	0.000822457	1	lncRNA
CDKN2B	-1.87773	0.000852519	1	protein_coding
DBH-AS1	-1.91479	0.000921592	1	lncRNA
AC009309.1	-1.84631	0.000966071	1	lncRNA
HIST1H2BG	-2.11653	0.000979673	1	protein_coding
AL137785.1	-2.18996	0.000991877	1	lncRNA

## Sheet: SNU423_Upregulated 
Gene name	LogFC	pValue	FDR	Biotype
UAP1L1	2.74491	8.99903e-29	1.90447e-24	protein_coding
NEURL3	5.13517	2.03129e-24	4.29861e-20	protein_coding
TNFAIP3	3.19378	6.36134e-20	1.34612e-15	protein_coding
TBX4	2.95549	2.19165e-16	4.63753e-12	protein_coding
AKNA	2.96619	5.63957e-15	1.19311e-10	protein_coding
PIM1	3.12881	2.77277e-14	5.86524e-10	protein_coding
LRRC8D	2.53767	1.22378e-13	2.58829e-09	protein_coding
RAB3IL1	2.46926	1.04642e-12	2.21286e-08	protein_coding
HLA-K	3.17854	6.7544e-12	1.42795e-07	unprocessed_pseudogene
NR1D2	2.11634	7.68065e-12	1.62369e-07	protein_coding
AC022506.1	3.70322	1.05328e-11	2.22653e-07	protein_coding
DDIT3	3.27236	2.84211e-11	6.00764e-07	protein_coding
KLHL24	2.78496	3.04854e-11	6.44369e-07	protein_coding
RFX3	2.14251	5.68218e-11	1.20093e-06	protein_coding
RELB	2.2762	7.59987e-11	1.60608e-06	protein_coding
FNIP1	1.86362	8.64329e-11	1.82633e-06	protein_coding
GAB2	2.53629	9.33996e-11	1.97335e-06	protein_coding
BCL2L11	1.69521	1.05571e-10	2.2304e-06	protein_coding
MAB21L4	2.28837	1.13794e-10	2.40401e-06	protein_coding
SLC44A2	2.6677	3.03697e-10	6.41469e-06	protein_coding
PATL1	1.88048	4.66317e-10	9.84767e-06	protein_coding
STC2	2.70477	5.12278e-10	1.08178e-05	protein_coding
INHBE	2.57405	7.09636e-10	1.49825e-05	protein_coding
CREBRF	2.3474	7.66388e-10	1.61792e-05	protein_coding
RHOT1	1.62624	1.77014e-09	3.73589e-05	protein_coding
PPARGC1A	3.39433	2.1431e-09	4.52258e-05	protein_coding
FAXDC2	1.94701	3.00131e-09	6.33306e-05	protein_coding
LCORL	1.48065	4.99704e-09	0.000105427	protein_coding
SECTM1	2.60398	6.55393e-09	0.000138248	protein_coding
CRTC3	1.61395	7.76085e-09	0.0001637	protein_coding
NR1D1	2.84501	8.15441e-09	0.000171993	protein_coding
GNA13	1.64669	8.43909e-09	0.000177989	protein_coding
NAPB	1.82556	8.69701e-09	0.00018342	protein_coding
DAGLA	2.04729	1.0817e-08	0.000228109	protein_coding
PHF3	1.81948	1.56433e-08	0.000329777	protein_coding
R3HDM2	1.55519	1.68258e-08	0.00035467	protein_coding
ZCCHC8	1.75869	1.95549e-08	0.00041214	protein_coding
THAP9-AS1	2.17685	1.96703e-08	0.000414551	lncRNA
BBC3	1.66305	2.09496e-08	0.000441491	protein_coding
DBP	1.57313	2.22922e-08	0.00046974	protein_coding
CTH	2.10602	2.22986e-08	0.000469853	protein_coding
PLEKHG3	1.82699	2.3776e-08	0.000500936	protein_coding
BCL3	1.50183	2.68208e-08	0.000565034	protein_coding
LRIG2	1.52382	3.05108e-08	0.000642588	protein_coding
PIK3IP1	2.37132	3.21092e-08	0.000676187	protein_coding
GXYLT2	1.66012	3.21104e-08	0.000676187	protein_coding
DCAF17	1.68246	3.338e-08	0.000702848	protein_coding
C5orf51	1.37728	3.65862e-08	0.000770286	protein_coding
ICAM1	1.52731	3.93921e-08	0.000829283	protein_coding
AC026461.2	3.61348	4.20166e-08	0.000884449	lncRNA
RNF19A	1.61653	4.35539e-08	0.000916766	protein_coding
TNKS2	1.14569	4.76628e-08	0.00100316	protein_coding
DMXL1	1.64722	4.7992e-08	0.00101004	protein_coding
SHPK	2.36365	5.29695e-08	0.00111469	protein_coding
UHRF1BP1	1.57905	5.32031e-08	0.00111955	protein_coding
AC093423.3	3.77418	6.45753e-08	0.00135873	protein_coding
MRPS31P5	2.18655	6.56346e-08	0.00138095	transcribed_unprocessed_pseudogene
KLHDC10	1.50531	7.52138e-08	0.00158235	protein_coding
YPEL2	2.27689	7.53889e-08	0.00158596	protein_coding
ELF3	1.71497	9.5317e-08	0.00200471	protein_coding
SLC30A1	1.74895	9.83632e-08	0.00206868	protein_coding
ARHGEF28	1.42581	1.19556e-07	0.00251391	protein_coding
SPICE1	2.27367	1.21271e-07	0.00254984	protein_coding
BTN2A2	1.48323	1.4512e-07	0.00305085	protein_coding
AMHR2	2.81334	1.48174e-07	0.00311492	protein_coding
NFATC2	1.77978	1.5591e-07	0.00327722	protein_coding
NFAT5	1.4797	1.57773e-07	0.00331622	protein_coding
WASL	1.39378	1.59623e-07	0.00335496	protein_coding
KIAA1958	1.7356	1.81947e-07	0.00382343	protein_coding
HBP1	1.79919	1.85584e-07	0.00389967	protein_coding
USP4	1.49277	1.94098e-07	0.0040782	protein_coding
USP4	1.49277	1.94098e-07	0.0040782	protein_coding
SH3BP2	1.79065	2.12504e-07	0.00446407	protein_coding
TUFT1	1.70281	2.16591e-07	0.00454971	protein_coding
GADD45B	2.71974	2.24527e-07	0.00471619	protein_coding
AL158066.1	2.06999	2.28849e-07	0.00480628	lncRNA
UVRAG	1.58998	2.29747e-07	0.00482492	protein_coding
AC010186.2	2.15987	2.33379e-07	0.00490095	transcribed_unprocessed_pseudogene
RARA	1.68545	2.43708e-07	0.00511713	protein_coding
AF127577.4	2.14898	2.5501e-07	0.00535418	lncRNA
AL691482.3	1.65457	2.68627e-07	0.00563982	lncRNA
MT1B	3.42641	2.723e-07	0.00571666	protein_coding
SH3RF2	1.4788	2.74313e-07	0.00575866	protein_coding
RRAGD	1.42796	2.82093e-07	0.00592142	protein_coding
ZMIZ1	1.60394	2.90873e-07	0.00610542	protein_coding
NCK1	1.33031	2.94015e-07	0.00617109	protein_coding
BMF	1.99595	3.00445e-07	0.00630573	protein_coding
TESK2	2.07019	3.05034e-07	0.00640144	protein_coding
SIK2	1.33835	3.16578e-07	0.00664307	protein_coding
ZCCHC7	1.28388	3.2221e-07	0.00676093	protein_coding
PALMD	1.5927	3.4887e-07	0.0073193	protein_coding
GADD45G	2.95415	3.65366e-07	0.00766428	protein_coding
CNOT6L	1.17203	3.67807e-07	0.00771512	protein_coding
ATP11B	1.23172	4.06768e-07	0.00853074	protein_coding
MTHFD2	1.7395	4.14429e-07	0.00869099	protein_coding
FAM193B	1.37829	4.3613e-07	0.0091452	protein_coding
SIK1B	1.80754	4.61834e-07	0.00968373	protein_coding
ARNT	1.34725	4.70803e-07	0.00987132	protein_coding
NR3C1	1.36334	4.75408e-07	0.0099674	protein_coding
SEC24B	1.70728	4.86982e-07	0.0102096	protein_coding
ASNSP1	3.3247	5.12375e-07	0.0107389	transcribed_unprocessed_pseudogene
AC036108.2	3.96492	5.18303e-07	0.0108626	lncRNA
LRIG3	2.22102	5.45242e-07	0.0114266	protein_coding
PACS1	1.71059	5.83398e-07	0.0122245	protein_coding
ZNF697	1.76069	5.87173e-07	0.012303	protein_coding
ANKRD13A	1.1685	6.08941e-07	0.0127579	protein_coding
STBD1	1.86662	6.19061e-07	0.0129687	protein_coding
CPEB4	2.01441	6.20245e-07	0.0129929	protein_coding
AC055811.2	1.99107	6.30021e-07	0.0131971	protein_coding
CNNM2	1.64095	7.17001e-07	0.0150133	protein_coding
PITPNM2	1.89802	7.24021e-07	0.0151596	protein_coding
PTAR1	1.40052	8.38218e-07	0.0175473	protein_coding
EFNA1	1.33812	8.47828e-07	0.0177476	protein_coding
AC119674.2	2.08525	8.88892e-07	0.0186063	protein_coding
WWC2	1.20725	1.02189e-06	0.0213862	protein_coding
FAM47E-STBD1	1.79189	1.02713e-06	0.0214948	protein_coding
AQP7	3.1367	1.1093e-06	0.0232111	protein_coding
AQP7	3.1367	1.1093e-06	0.0232111	protein_coding
SLC38A3	1.76325	1.13757e-06	0.023799	protein_coding
HS1BP3	1.36905	1.14979e-06	0.0240525	protein_coding
QKI	1.26776	1.16276e-06	0.0243216	protein_coding
AC027796.3	2.35871	1.17095e-06	0.0244917	protein_coding
IRF1	1.61154	1.17416e-06	0.0245576	protein_coding
SNX27	1.41638	1.23162e-06	0.0257557	protein_coding
ASB7	1.3189	1.26882e-06	0.0265311	protein_coding
NFIL3	1.96446	1.30331e-06	0.0272509	protein_coding
MTMR3	1.50365	1.34742e-06	0.0281719	protein_coding
OCLN	1.61065	1.40591e-06	0.029392	protein_coding
ABHD2	1.27873	1.47142e-06	0.03076	protein_coding
NFXL1	1.38395	1.50135e-06	0.0313842	protein_coding
TMEFF1	1.39536	1.50791e-06	0.0315198	protein_coding
PI4KAP2	1.51684	1.55684e-06	0.0325395	transcribed_unitary_pseudogene
JMY	1.87435	1.60959e-06	0.0336373	protein_coding
PPP1R3E	2.47765	1.61783e-06	0.0338079	protein_coding
KLF15	1.9279	1.62793e-06	0.0340172	protein_coding
PRAG1	1.38354	1.73044e-06	0.0361541	protein_coding
AL135905.2	1.4574	1.78017e-06	0.0371877	protein_coding
PPP3CC	1.38025	1.78273e-06	0.0372394	protein_coding
COX10	1.50755	1.8122e-06	0.0378531	protein_coding
PAWR	1.52324	1.83868e-06	0.0384045	protein_coding
MLLT10	1.34108	1.87366e-06	0.0391333	protein_coding
SERTAD2	1.20024	1.87662e-06	0.0391932	protein_coding
MT2P1	2.12801	1.88057e-06	0.0392738	processed_pseudogene
FOXN3	1.55385	1.89345e-06	0.039541	protein_coding
GATA4	1.31264	1.92572e-06	0.0402129	protein_coding
AMOTL2	1.56488	2.19789e-06	0.0458897	protein_coding
PTP4A1	1.4512	2.20519e-06	0.04604	protein_coding
ARRDC3	1.5557	2.23447e-06	0.0466467	protein_coding
WDR19	1.22694	2.24556e-06	0.0468738	protein_coding
RHOBTB3	1.10097	2.31675e-06	0.0483553	protein_coding
RAD52	1.51287	2.32858e-06	0.0485998	protein_coding
AC092821.3	2.09773	2.36152e-06	0.0492849	lncRNA
AC018638.5	2.33779	2.441e-06	0.0509338	processed_pseudogene
MAP3K1	1.33595	2.49347e-06	0.0520237	protein_coding
GRPEL2	1.46489	2.58517e-06	0.0539344	protein_coding
AHCYL2	1.48984	2.69517e-06	0.0562267	protein_coding
ATF3	1.87632	2.70942e-06	0.0565213	protein_coding
SLC43A1	1.168	2.80648e-06	0.0585404	protein_coding
TAPT1	1.29099	2.93196e-06	0.0611459	protein_coding
MBNL2	1.68853	2.97805e-06	0.0621042	protein_coding
VIPAS39	1.24398	3.07387e-06	0.0640964	protein_coding
BHLHE40	2.76103	3.42396e-06	0.0713862	protein_coding
C5AR1	7.07048	3.43366e-06	0.0715849	protein_coding
TEAD1	1.12712	3.53928e-06	0.0737799	protein_coding
C2orf15	1.87247	3.71953e-06	0.0775299	protein_coding
SNX30	1.2886	3.94557e-06	0.0822295	protein_coding
LRP5L	2.71269	4.0416e-06	0.0842229	protein_coding
TEF	1.47261	4.17817e-06	0.0870647	protein_coding
SIK3	1.27808	4.24531e-06	0.0884596	protein_coding
ERBIN	1.22307	4.3181e-06	0.0899719	protein_coding
ABHD4	1.40024	4.35969e-06	0.0908341	protein_coding
SETDB2	1.41359	4.52786e-06	0.0943244	protein_coding
SMAD7	1.44897	4.78191e-06	0.0996025	protein_coding
DIO1	2.72922	5.1389e-06	0.107002	protein_coding
PCIF1	1.71578	5.1506e-06	0.107241	protein_coding
STAM2	1.08995	5.17543e-06	0.107752	protein_coding
NUPR1	1.74632	5.35772e-06	0.111526	protein_coding
SYBU	1.94047	5.40261e-06	0.11245	protein_coding
RCBTB1	1.14399	5.40588e-06	0.112513	protein_coding
ZNF16	1.67358	5.59014e-06	0.116331	protein_coding
ZFYVE9	1.63412	5.70893e-06	0.118791	protein_coding
ATG14	1.26993	5.94708e-06	0.123729	protein_coding
SNTB1	1.50973	6.18137e-06	0.128585	protein_coding
TMEM150B	2.14578	6.20796e-06	0.129132	protein_coding
PHF21A	1.13303	6.48782e-06	0.13494	protein_coding
XRN1	1.42634	6.51175e-06	0.135431	protein_coding
AC009879.3	2.5812	6.79585e-06	0.14132	protein_coding
IL34	2.0566	6.90821e-06	0.143649	protein_coding
ATF7	1.096	7.34652e-06	0.152734	protein_coding
ATF7	1.096	7.34652e-06	0.152734	protein_coding
FTO	1.25198	7.56193e-06	0.157197	protein_coding
GCOM1	1.73106	7.65095e-06	0.159033	protein_coding
C5orf34	1.79285	8.13325e-06	0.169009	protein_coding
VPS11	1.54286	8.13859e-06	0.169112	protein_coding
GPCPD1	1.67485	8.38072e-06	0.174118	protein_coding
ZNF460	2.36855	8.39796e-06	0.174468	protein_coding
AC129492.4	2.47314	8.49921e-06	0.176554	protein_coding
TP53BP2	1.27532	8.58658e-06	0.178352	protein_coding
SH3D19	1.12058	8.70941e-06	0.180886	protein_coding
PIP4K2C	1.44175	8.89424e-06	0.184707	protein_coding
DESI2	1.55042	9.06546e-06	0.188226	protein_coding
MT-ND5	1.94185	9.20891e-06	0.191177	protein_coding
TNFRSF14	1.68771	9.36578e-06	0.194415	protein_coding
TBCK	1.5419	9.43384e-06	0.195818	protein_coding
CAPN5	1.90912	9.6207e-06	0.199668	protein_coding
MSANTD3-TMEFF1	1.27216	9.7539e-06	0.202403	protein_coding
PPP1R15A	1.79791	9.90749e-06	0.20557	protein_coding
UHRF1BP1L	1.2268	1.05216e-05	0.21826	protein_coding
ATXN2L	1.43454	1.05932e-05	0.219735	protein_coding
RRAGC	1.25675	1.06263e-05	0.220411	protein_coding
MKRN2	1.37189	1.09984e-05	0.228085	protein_coding
ANKRD27	1.17463	1.10469e-05	0.229081	protein_coding
SH3TC1	1.40017	1.11714e-05	0.23165	protein_coding
IFIT3	1.8818	1.13205e-05	0.234719	protein_coding
FZD5	1.28025	1.15614e-05	0.239691	protein_coding
ZNF710	1.26657	1.17212e-05	0.24298	protein_coding
ZBTB11	1.29292	1.17669e-05	0.243917	protein_coding
CRIM1	1.2497	1.21051e-05	0.250902	protein_coding
EPB41L4A-AS1	1.57669	1.22815e-05	0.254509	lncRNA
RCOR3	1.27814	1.23719e-05	0.25637	protein_coding
FGD4	1.39467	1.25363e-05	0.259753	protein_coding
MANBA	1.36535	1.26052e-05	0.261167	protein_coding
FOXN2	1.80559	1.2916e-05	0.267594	protein_coding
JAK1	1.26676	1.30037e-05	0.269385	protein_coding
AC112128.1	1.89702	1.31779e-05	0.272981	protein_coding
AFG1L	1.17439	1.34162e-05	0.277903	protein_coding
SEPT7P2	1.64638	1.41931e-05	0.293897	transcribed_unprocessed_pseudogene
NFYC	1.32214	1.42332e-05	0.294712	protein_coding
PFKFB2	1.40862	1.4608e-05	0.302429	protein_coding
CTNND1	1.12312	1.49182e-05	0.308822	protein_coding
SH2B3	1.50602	1.49911e-05	0.310316	protein_coding
CNKSR3	1.23311	1.51082e-05	0.312708	protein_coding
PLPP3	1.51483	1.52975e-05	0.316611	protein_coding
PHC3	1.47964	1.53052e-05	0.316756	protein_coding
BACH1	1.14686	1.62459e-05	0.336193	protein_coding
AC019080.1	1.76885	1.63217e-05	0.337746	lncRNA
ACSF3	1.12748	1.63442e-05	0.338194	protein_coding
ST6GALNAC4	1.70577	1.64271e-05	0.339894	protein_coding
RAB11FIP4	1.28481	1.69455e-05	0.35057	protein_coding
DGAT2	1.08572	1.69926e-05	0.351526	protein_coding
KAT7	1.42965	1.74855e-05	0.361687	protein_coding
AL137129.1	1.68039	1.74947e-05	0.361861	lncRNA
TCF12	1.24255	1.76447e-05	0.364927	protein_coding
CBFA2T2	1.24833	1.76877e-05	0.365799	protein_coding
ZNF442	2.25816	1.82203e-05	0.376777	protein_coding
TRAPPC11	1.36994	1.86158e-05	0.384901	protein_coding
SLC16A6	2.33795	1.89843e-05	0.39248	protein_coding
PCNX4	0.981128	1.90115e-05	0.393024	protein_coding
ZSCAN2	1.10695	1.96047e-05	0.405268	protein_coding
MERTK	1.25729	1.96349e-05	0.405874	protein_coding
IQSEC1	1.11033	1.99473e-05	0.41227	protein_coding
PARD3B	1.37275	1.99934e-05	0.413184	protein_coding
PDZK1IP1	2.63095	2.00545e-05	0.414427	protein_coding
RLIM	1.3557	2.02274e-05	0.417959	protein_coding
GOLGA5	1.19898	2.03394e-05	0.420232	protein_coding
FSD1L	1.7483	2.04672e-05	0.422853	protein_coding
FEM1C	1.36624	2.1032e-05	0.434458	protein_coding
SLC7A11	1.83732	2.10957e-05	0.435753	protein_coding
TRAK1	0.910522	2.11849e-05	0.437573	protein_coding
TUBE1	1.38262	2.15697e-05	0.4455	protein_coding
SLC25A36	1.22917	2.27382e-05	0.46959	protein_coding
SDC4	1.47556	2.33548e-05	0.482299	protein_coding
CTIF	1.48403	2.37962e-05	0.491367	protein_coding
ZFYVE1	1.29016	2.39631e-05	0.49479	protein_coding
AC073869.1	1.5587	2.3997e-05	0.495467	transcribed_processed_pseudogene
CHST3	1.76171	2.60989e-05	0.53876	protein_coding
AC008758.1	2.27266	2.62893e-05	0.542664	protein_coding
TMEM200A	1.64625	2.63495e-05	0.54388	protein_coding
CERS4	1.13945	2.63632e-05	0.544137	protein_coding
NAMPT	1.35271	2.63815e-05	0.544487	protein_coding
STX17	1.08838	2.65346e-05	0.547621	protein_coding
STARD13	1.34607	2.69947e-05	0.557062	protein_coding
RIPK4	1.20658	2.74681e-05	0.566749	protein_coding
PPFIBP2	1.34152	2.7516e-05	0.56771	protein_coding
RF01956	3.09471	2.78316e-05	0.574193	misc_RNA
RNF169	1.57328	2.84668e-05	0.587212	protein_coding
PRDM4	1.19838	2.87744e-05	0.5935	protein_coding
FAM83G	1.11129	2.8783e-05	0.593649	protein_coding
UBR2	1.03082	2.90796e-05	0.599681	protein_coding
TTLL4	1.28788	2.91065e-05	0.600205	protein_coding
SLC7A1	1.32822	2.93928e-05	0.606079	protein_coding
JADE2	1.20786	2.96509e-05	0.611371	protein_coding
ATXN7	1.38437	3.0679e-05	0.632448	protein_coding
RAB33B	1.11176	3.12704e-05	0.644545	protein_coding
AC079781.5	1.39672	3.13105e-05	0.645341	lncRNA
RANBP10	1.27698	3.15062e-05	0.649316	protein_coding
SLC10A7	1.35495	3.24204e-05	0.668023	protein_coding
ACSL1	1.15755	3.27801e-05	0.675402	protein_coding
AC013275.1	3.56618	3.32478e-05	0.685005	lncRNA
OSGIN2	1.43172	3.45122e-05	0.71078	protein_coding
ZBTB2	1.49067	3.54019e-05	0.728925	protein_coding
ZNF805	1.37797	3.55251e-05	0.731426	protein_coding
DACT2	1.38562	3.59584e-05	0.740276	protein_coding
AC118549.1	1.14003	3.61819e-05	0.744841	protein_coding
RANBP9	1.24856	3.64967e-05	0.751248	protein_coding
INTS12	1.54874	3.75004e-05	0.77187	protein_coding
TIPARP	1.32046	3.88242e-05	0.799042	protein_coding
HPS4	1.1541	3.93113e-05	0.809026	protein_coding
DYRK1A	1.17784	3.98916e-05	0.82085	protein_coding
EPS15L1	1.27551	4.01619e-05	0.82637	protein_coding
SENP7	1.22361	4.0339e-05	0.829976	protein_coding
SNX13	1.20601	4.05805e-05	0.834863	protein_coding
APBB2	1.22599	4.07564e-05	0.838441	protein_coding
TBC1D15	0.946153	4.07799e-05	0.838884	protein_coding
ELMSAN1	1.59243	4.09513e-05	0.842368	protein_coding
LINC02246	1.91413	4.1084e-05	0.845057	lncRNA
NUAK2	2.11007	4.12527e-05	0.848486	protein_coding
SMAD3	0.972525	4.15248e-05	0.853998	protein_coding
MT-RNR2	1.62021	4.24916e-05	0.873671	Mt_rRNA
RPL39P5	1.36394	4.27886e-05	0.879734	transcribed_processed_pseudogene
SLC12A7	1.03005	4.3013e-05	0.884219	protein_coding
BIRC3	2.19813	4.34827e-05	0.893787	protein_coding
SLX4IP	1.25738	4.40636e-05	0.905683	protein_coding
N4BP2L1	1.42189	4.48745e-05	0.922261	protein_coding
RHOU	1.12159	4.61076e-05	0.947558	protein_coding
HEATR6	1.42294	4.67998e-05	0.961689	protein_coding
KLHL5	1.15201	4.78269e-05	0.982746	protein_coding
NEDD4	1.37436	4.79864e-05	0.985928	protein_coding
CBX4	1.59599	4.82425e-05	0.991142	protein_coding
AC097359.2	1.89965	4.85647e-05	0.997714	lncRNA
ZNF251	1.20807	4.98596e-05	1	protein_coding
AC108488.1	1.28503	5.00932e-05	1	lncRNA
AC010186.4	2.2149	5.11424e-05	1	lncRNA
ZNF385C	2.33167	5.26039e-05	1	protein_coding
FBXO25	0.930479	5.33508e-05	1	protein_coding
MT1G	2.59718	5.38416e-05	1	protein_coding
MVB12B	1.33876	5.50949e-05	1	protein_coding
GLMP	1.22326	5.53461e-05	1	protein_coding
ETV6	1.23708	5.54895e-05	1	protein_coding
AC125232.2	1.94032	5.60989e-05	1	lncRNA
AC093884.1	1.48124	5.61467e-05	1	protein_coding
IRAK2	1.41133	5.73051e-05	1	protein_coding
PLEKHM3	1.5878	5.77077e-05	1	protein_coding
SMTNL2	3.25453	5.90887e-05	1	protein_coding
CFAP97	1.09844	6.02493e-05	1	protein_coding
ARFGEF2	0.893528	6.04203e-05	1	protein_coding
KLHL42	1.12887	6.25379e-05	1	protein_coding
TIMM23B	1.7166	6.27358e-05	1	protein_coding
CRTC2	1.13614	6.295e-05	1	protein_coding
RPRD2	1.05134	6.36353e-05	1	protein_coding
SIRT1	1.32769	6.39013e-05	1	protein_coding
TNFRSF19	1.42789	6.39329e-05	1	protein_coding
OCRL	1.00603	6.41811e-05	1	protein_coding
COLGALT2	1.9909	6.45671e-05	1	protein_coding
MEF2D	1.33412	6.53366e-05	1	protein_coding
SLC25A30	1.33741	6.62035e-05	1	protein_coding
PTPRM	1.27688	6.63499e-05	1	protein_coding
MYO5C	1.03475	6.64677e-05	1	protein_coding
ZNF280D	1.14643	6.67512e-05	1	protein_coding
ZFAND3	0.978327	6.68575e-05	1	protein_coding
RAB3GAP1	0.968917	6.68695e-05	1	protein_coding
LAD1	1.0409	6.75723e-05	1	protein_coding
LINC01473	6.3909	6.81075e-05	1	lncRNA
IFIH1	1.68995	6.81185e-05	1	protein_coding
RSC1A1	1.58609	6.84381e-05	1	protein_coding
IFIT1	1.52601	6.99284e-05	1	protein_coding
AC018630.2	2.07657	7.03632e-05	1	protein_coding
LRRC37B	1.58653	7.11931e-05	1	protein_coding
ASS1	1.15782	7.16614e-05	1	protein_coding
TNKS	1.18549	7.22628e-05	1	protein_coding
DUSP10	1.49977	7.49838e-05	1	protein_coding
ZNF318	0.884643	7.51409e-05	1	protein_coding
NBR1	1.05999	7.56274e-05	1	protein_coding
TNS3	1.12736	7.60088e-05	1	protein_coding
ASNS	1.4425	7.77671e-05	1	protein_coding
SPIN1	1.1445	8.0284e-05	1	protein_coding
ADGRG1	1.46333	8.08971e-05	1	protein_coding
CADPS2	1.10533	8.11913e-05	1	protein_coding
TEPSIN	1.08655	8.21476e-05	1	protein_coding
SETD2	1.16549	8.21619e-05	1	protein_coding
ZNF333	1.46711	8.31769e-05	1	protein_coding
ANKRD33B	1.78082	8.38903e-05	1	protein_coding
C1orf210	2.2455	8.5755e-05	1	protein_coding
UNC5B	1.17997	8.59465e-05	1	protein_coding
HERC3	1.91809	8.63129e-05	1	protein_coding
MIA2	1.06261	8.72473e-05	1	protein_coding
SYNJ2	0.98859	8.84752e-05	1	protein_coding
KANSL1	1.18106	9.1476e-05	1	protein_coding
CDON	1.55108	9.19326e-05	1	protein_coding
CTDSP2	1.19773	9.67397e-05	1	protein_coding
CDS2	1.09676	9.73465e-05	1	protein_coding
ITFG2	1.53875	9.80946e-05	1	protein_coding
RHBG	1.33782	9.90567e-05	1	protein_coding
VEGFA	1.65783	9.9428e-05	1	protein_coding
FCHSD2	1.3506	0.00010033	1	protein_coding
GSE1	1.22722	0.000102653	1	protein_coding
TLK1	1.05507	0.000105073	1	protein_coding
AC138696.1	1.6871	0.000105991	1	protein_coding
CASZ1	1.34571	0.000106504	1	protein_coding
SLC6A9	1.51602	0.000109568	1	protein_coding
ALAD	1.23353	0.000110151	1	protein_coding
ZNRF3	1.11116	0.000112432	1	protein_coding
ZMYM5	1.17375	0.000112626	1	protein_coding
GTF2IRD1	1.34302	0.000113069	1	protein_coding
LINC01572	2.00706	0.000114679	1	lncRNA
MOSPD2	1.14964	0.000115439	1	protein_coding
SASH1	1.15651	0.000116601	1	protein_coding
ZNF507	1.28938	0.00011764	1	protein_coding
TRIM23	1.4718	0.000117937	1	protein_coding
JADE3	1.19282	0.000119687	1	protein_coding
ABCC6P1	1.38843	0.000120354	1	transcribed_unprocessed_pseudogene
C2orf27A	1.71891	0.00012127	1	transcribed_unprocessed_pseudogene
DOP1B	1.52413	0.000121894	1	protein_coding
ZBTB10	1.06282	0.000121954	1	protein_coding
ADM2	1.07281	0.000123679	1	protein_coding
RAPH1	1.18743	0.000124348	1	protein_coding
ZNF777	1.31787	0.000125137	1	protein_coding
AC137834.1	2.18264	0.000125223	1	protein_coding
ATP7B	1.02724	0.000125678	1	protein_coding
KCTD7	1.14561	0.000126262	1	protein_coding
FLCN	1.47818	0.000126907	1	protein_coding
FAM193A	0.972982	0.000130737	1	protein_coding
ZC4H2	1.39978	0.000130775	1	protein_coding
HEATR5B	1.71688	0.000131534	1	protein_coding
ABCB7	0.985874	0.000133405	1	protein_coding
MT-ND4	1.90646	0.000134542	1	protein_coding
PTPRK	1.09654	0.000136911	1	protein_coding
DDIT4	1.28863	0.000138387	1	protein_coding
AMBRA1	1.28291	0.000139602	1	protein_coding
TUBG2	1.3448	0.000143058	1	protein_coding
MT1CP	3.67344	0.000145758	1	transcribed_unprocessed_pseudogene
RND1	1.70327	0.000145828	1	protein_coding
HIVEP1	1.2421	0.000148805	1	protein_coding
TIGD2	1.02407	0.000150974	1	protein_coding
SLCO2A1	1.69074	0.000151954	1	protein_coding
GPATCH8	1.13864	0.000153666	1	protein_coding
RABGAP1	1.14899	0.00016219	1	protein_coding
RABGAP1	1.14899	0.00016219	1	protein_coding
ACAP2	0.964649	0.000163274	1	protein_coding
PRXL2C	1.25485	0.000164118	1	protein_coding
PIM3	1.66159	0.000166064	1	protein_coding
REPS1	0.999841	0.000167106	1	protein_coding
CDKAL1	1.23883	0.000170626	1	protein_coding
BFAR	1.05611	0.000170665	1	protein_coding
CLK4	1.452	0.000171249	1	protein_coding
CCT6P1	1.74013	0.00017199	1	transcribed_unprocessed_pseudogene
LNX2	0.919191	0.000174911	1	protein_coding
TUT4	1.06116	0.000175529	1	protein_coding
ZNF277	1.23916	0.000178347	1	protein_coding
RASSF8	1.3359	0.000178616	1	protein_coding
GDF15	1.73343	0.000181567	1	protein_coding
MTPAP	0.992859	0.000182188	1	protein_coding
AC010186.3	2.2372	0.000182781	1	lncRNA
IRS1	0.917042	0.000183082	1	protein_coding
CIT	1.28209	0.000186605	1	protein_coding
SETDB1	1.01948	0.000187015	1	protein_coding
MBD6	1.17717	0.00018903	1	protein_coding
BBS12	1.92049	0.000189124	1	protein_coding
LRCH1	1.56926	0.000192104	1	protein_coding
CHST15	1.75689	0.000192392	1	protein_coding
PEG13	3.56071	0.000192892	1	lncRNA
KANK1	1.0803	0.000198057	1	protein_coding
ZDHHC17	1.23967	0.00019932	1	protein_coding
NR3C2	2.78546	0.000199471	1	protein_coding
VAMP2	1.49951	0.000199618	1	protein_coding
CEBPG	1.36856	0.000199936	1	protein_coding
HIC2	1.16251	0.000202881	1	protein_coding
HINT3	0.851252	0.000206159	1	protein_coding
NUAK1	1.83065	0.00020783	1	protein_coding
AQP4	2.37361	0.000208155	1	protein_coding
FNIP2	1.17565	0.000208386	1	protein_coding
MVP	1.40701	0.000208571	1	protein_coding
SBF2	1.15017	0.000210761	1	protein_coding
NRP2	1.70732	0.000211402	1	protein_coding
PRUNE1	0.993029	0.000214274	1	protein_coding
ZBTB39	1.15648	0.000217728	1	protein_coding
CD55	1.75563	0.000218147	1	protein_coding
CDKN1B	1.2237	0.000221014	1	protein_coding
RUSC2	1.34579	0.0002266	1	protein_coding
COG5	0.879714	0.000226741	1	protein_coding
CELSR2	1.62365	0.000227097	1	protein_coding
BATF2	1.60411	0.00022835	1	protein_coding
CPQ	0.982755	0.000231168	1	protein_coding
AC125232.1	1.96948	0.000234335	1	unprocessed_pseudogene
DNMBP	0.963092	0.000235547	1	protein_coding
WHAMMP3	2.24624	0.000237079	1	transcribed_unprocessed_pseudogene
CEP83	0.987551	0.000237182	1	protein_coding
AL162231.3	1.36469	0.000237629	1	protein_coding
ZNF433	1.97793	0.000240347	1	protein_coding
VPS26C	0.971204	0.000240845	1	protein_coding
MARVELD2	0.933989	0.00024407	1	protein_coding
AARS	1.05904	0.000245092	1	protein_coding
AL353743.1	2.00246	0.000246195	1	transcribed_unprocessed_pseudogene
ZNF2	1.27053	0.000248752	1	protein_coding
ZSCAN12	1.32825	0.000253263	1	protein_coding
ZXDB	1.33365	0.00025388	1	protein_coding
GPR37	1.7421	0.000254413	1	protein_coding
CBLB	1.52323	0.000255895	1	protein_coding
EPC1	0.847625	0.000256115	1	protein_coding
NEDD4L	0.944753	0.00026032	1	protein_coding
CCDC6	1.01344	0.000260463	1	protein_coding
CAB39	0.991114	0.000266442	1	protein_coding
GIT2	1.23046	0.000268611	1	protein_coding
PJA2	0.989925	0.000271711	1	protein_coding
SLC22A7	1.38266	0.000272884	1	protein_coding
TTC9C	0.930558	0.000273541	1	protein_coding
SYDE2	1.72543	0.000273906	1	protein_coding
SSH1	1.03509	0.000278903	1	protein_coding
MBTD1	0.972931	0.000279711	1	protein_coding
MPPE1	0.987921	0.000281741	1	protein_coding
TBC1D19	1.51599	0.000282492	1	protein_coding
RAB5A	0.945785	0.000287798	1	protein_coding
PELI1	1.27576	0.000293658	1	protein_coding
KSR1	1.19381	0.000298727	1	protein_coding
CCDC85C	0.862924	0.000301673	1	protein_coding
FAM214A	1.39674	0.000302836	1	protein_coding
FBXO31	1.065	0.00030428	1	protein_coding
GPR146	2.46615	0.000304677	1	protein_coding
LSM12	1.21798	0.000309103	1	protein_coding
ZMYM6	1.16595	0.000309854	1	protein_coding
VWA8	1.12532	0.000310942	1	protein_coding
PAPOLG	1.0624	0.000313635	1	protein_coding
PXK	1.713	0.000317332	1	protein_coding
BTRC	0.906532	0.00032941	1	protein_coding
TFAP4	1.34806	0.0003315	1	protein_coding
WASF3	1.17725	0.000332423	1	protein_coding
NIPAL3	0.952549	0.000332963	1	protein_coding
XPO7	0.989562	0.000333577	1	protein_coding
AC092620.1	1.64265	0.000336556	1	lncRNA
ADNP2	0.965087	0.000339242	1	protein_coding
PPFIA1	0.848613	0.000339692	1	protein_coding
PTEN	1.17105	0.000340569	1	protein_coding
ACVR1	1.24223	0.000342153	1	protein_coding
EBF3	2.48585	0.000347131	1	protein_coding
TTK	0.97823	0.000347862	1	protein_coding
ASAP1	0.984262	0.000353053	1	protein_coding
ATF2	1.10583	0.000353555	1	protein_coding
GADD45A	1.23884	0.000354829	1	protein_coding
EAF1	1.08026	0.000356159	1	protein_coding
RNF41	1.00694	0.000357104	1	protein_coding
GPBP1L1	0.935075	0.000357948	1	protein_coding
FBXO32	2.24941	0.000358541	1	protein_coding
MT2A	1.46763	0.000361106	1	protein_coding
AFF1	0.977141	0.000379397	1	protein_coding
SCMH1	1.11057	0.000380665	1	protein_coding
ERN1	1.11219	0.000387172	1	protein_coding
ZNF592	1.08191	0.000388197	1	protein_coding
SCAF8	1.03005	0.000392105	1	protein_coding
AL512785.2	2.58651	0.000399946	1	protein_coding
SLC3A2	1.54446	0.0004029	1	protein_coding
NFKB2	1.12348	0.00040659	1	protein_coding
SEMA3D	1.84175	0.000407423	1	protein_coding
FER	1.02086	0.00040821	1	protein_coding
OSBPL9	0.937893	0.000412995	1	protein_coding
LRRC37A2	3.10731	0.000419948	1	protein_coding
ATP1A1	1.06394	0.00042241	1	protein_coding
ZSCAN21	1.27756	0.000426305	1	protein_coding
ZNF709	2.04022	0.000427541	1	protein_coding
HDAC5	1.12762	0.000430618	1	protein_coding
CNNM4	1.00876	0.000436657	1	protein_coding
SMIM29	1.29897	0.000439818	1	protein_coding
GPATCH2	1.01073	0.000442174	1	protein_coding
ALX1	1.70561	0.000444579	1	protein_coding
CCSER2	0.900739	0.000446022	1	protein_coding
NBPF1	0.97298	0.000447469	1	protein_coding
AXIN1	1.14522	0.000451885	1	protein_coding
PVT1	1.77597	0.00045352	1	lncRNA
PLEKHA5	0.906449	0.000462784	1	protein_coding
FAM169A	1.2649	0.000477692	1	protein_coding
USP25	1.00845	0.000477984	1	protein_coding
POC5	1.25741	0.000488089	1	protein_coding
TET1	1.53033	0.000496808	1	protein_coding
AC021218.1	2.17256	0.000498401	1	lncRNA
ARSG	1.71217	0.000499599	1	protein_coding
BAIAP2L2	1.67536	0.000503543	1	protein_coding
ZNF740	0.908751	0.000507598	1	protein_coding
DHRSX	1.01656	0.00051011	1	protein_coding
ACBD5	0.994328	0.000520879	1	protein_coding
NLK	0.90115	0.000522963	1	protein_coding
ST3GAL3	1.15774	0.000529831	1	protein_coding
TTC17	1.14982	0.000531177	1	protein_coding
JMJD1C	1.12003	0.000536236	1	protein_coding
ARL15	1.25303	0.000537274	1	protein_coding
CYP3A7-CYP3A51P	2.6584	0.000537301	1	protein_coding
TMEM167B	0.963759	0.000537338	1	protein_coding
SOWAHB	1.40035	0.000538988	1	protein_coding
MT1X	1.57295	0.000542814	1	protein_coding
MAGI3	0.980846	0.000548922	1	protein_coding
MED13L	1.09636	0.00055182	1	protein_coding
RAB3A	2.30282	0.0005637	1	protein_coding
RNF19B	1.06483	0.000565074	1	protein_coding
MICU3	1.45322	0.000567581	1	protein_coding
BTG1	0.902103	0.000573152	1	protein_coding
TAP1	1.34738	0.000574185	1	protein_coding
TMEM106B	1.01952	0.000574296	1	protein_coding
BCL7A	0.922082	0.000575667	1	protein_coding
ANO9	1.16153	0.000577481	1	protein_coding
WARS2	1.03091	0.000583363	1	protein_coding
XRRA1	1.05874	0.000583836	1	protein_coding
STAG2	0.965348	0.000584806	1	protein_coding
MBOAT1	2.19125	0.000597681	1	protein_coding
USP54	1.27737	0.000601829	1	protein_coding
MT1H	2.39215	0.000604397	1	protein_coding
DTD2	1.11338	0.000605732	1	protein_coding
STAG1	0.874244	0.000611958	1	protein_coding
ZFAND1	1.0603	0.00061569	1	protein_coding
TRPC1	1.16589	0.000617388	1	protein_coding
HSPBAP1	1.56484	0.000619254	1	protein_coding
ZNF12	0.875084	0.000619944	1	protein_coding
THAP8	1.1418	0.00062265	1	protein_coding
DDX58	1.154	0.000637339	1	protein_coding
AC039056.2	6.85423	0.00063756	1	lncRNA
IFRD1	1.25584	0.00065696	1	protein_coding
AC026461.1	1.55793	0.000667639	1	lncRNA
RNF111	0.876903	0.000673394	1	protein_coding
HSD3B7	0.888564	0.000679178	1	protein_coding
TRIM16	1.09882	0.000684955	1	protein_coding
ARID5B	1.13202	0.000686029	1	protein_coding
CDC14B	0.917789	0.000687658	1	protein_coding
BCL9L	0.881936	0.000688882	1	protein_coding
USP53	0.949669	0.000691014	1	protein_coding
SULT1C4	1.92347	0.000694876	1	protein_coding
SLC12A6	1.06542	0.00069817	1	protein_coding
CLCN3	0.824456	0.000701085	1	protein_coding
AC011462.2	0.867203	0.00070613	1	protein_coding
MTSS1	1.02329	0.000716057	1	protein_coding
COQ8B	0.951393	0.000721382	1	protein_coding
AFF4	1.01818	0.000728382	1	protein_coding
TANC1	1.06379	0.000743827	1	protein_coding
SLC48A1	1.26624	0.000762937	1	protein_coding
ZBTB33	1.141	0.000769776	1	protein_coding
IRF2	1.21338	0.000772933	1	protein_coding
ZNF644	0.925809	0.000773349	1	protein_coding
TWF1P1	2.09179	0.000774158	1	processed_pseudogene
MYO5B	0.947941	0.000779231	1	protein_coding
PICALM	0.74721	0.000789674	1	protein_coding
AC019117.3	1.67301	0.000789721	1	protein_coding
ZSCAN26	1.34657	0.000790586	1	protein_coding
GPD1L	1.04056	0.000796911	1	protein_coding
KDM4C	0.827079	0.000800536	1	protein_coding
ZBTB26	0.94415	0.000806843	1	protein_coding
CYP19A1	1.60479	0.000810604	1	protein_coding
STOX1	1.2094	0.000812758	1	protein_coding
LIPT1	1.15366	0.00081384	1	protein_coding
PKP2	0.832691	0.000814082	1	protein_coding
CEP57	0.843092	0.000814093	1	protein_coding
MAPK6	0.976809	0.000817669	1	protein_coding
AC129492.1	1.30259	0.000819925	1	protein_coding
KCTD9	0.829498	0.000822025	1	protein_coding
TRAPPC10	1.32585	0.000825585	1	protein_coding
LHFPL2	0.809777	0.000835143	1	protein_coding
KIAA1324L	0.890622	0.00083525	1	protein_coding
PLEKHA2	1.28135	0.000838777	1	protein_coding
NCK2	0.945623	0.000840087	1	protein_coding
FGD3	1.39591	0.000848192	1	protein_coding
ZSCAN31	1.84011	0.000853249	1	protein_coding
AC005324.3	1.52185	0.000858459	1	protein_coding
VAMP4	0.914024	0.000864948	1	protein_coding
NOL4L	1.02993	0.000865997	1	protein_coding
SETD4	1.00463	0.000866076	1	protein_coding
PRH1	1.92202	0.000871126	1	protein_coding
HERPUD2	0.948558	0.000879163	1	protein_coding
ZFP1	1.09311	0.000880547	1	protein_coding
FOXP4	1.16007	0.000889183	1	protein_coding
RNU6-574P	6.39941	0.0008969	1	snRNA
DST	1.0129	0.000904296	1	protein_coding
TSC1	0.858384	0.000904627	1	protein_coding
TAB3	0.872127	0.000906931	1	protein_coding
GABARAPL1	1.14927	0.00090767	1	protein_coding
BRAF	0.821236	0.000917709	1	protein_coding
WASH7P	1.81805	0.000925562	1	unprocessed_pseudogene
PHLPP1	0.979814	0.000928638	1	protein_coding
WASHC4	0.810024	0.00092941	1	protein_coding
ZNF627	1.46524	0.000936754	1	protein_coding
MRPL10	0.915241	0.000941725	1	protein_coding
SMAD2	0.801557	0.000941946	1	protein_coding
CYFIP2	1.09625	0.000950823	1	protein_coding
SEPSECS	1.00346	0.000952353	1	protein_coding
CDHR2	1.05401	0.000952379	1	protein_coding
FIBIN	2.44345	0.000957029	1	protein_coding
TM9SF4	0.844936	0.00095754	1	protein_coding
CBX8	0.880625	0.000964625	1	protein_coding
FBXL4	0.793742	0.000964646	1	protein_coding
MR1	1.78883	0.000967573	1	protein_coding
AC008622.2	1.74162	0.000969745	1	lncRNA
ZNF441	1.76241	0.000974104	1	protein_coding
DMD	0.843488	0.000994482	1	protein_coding

## Sheet: SNU423_Upregulated> 1,5
Gene name	LogFC	pValue	FDR	Biotype
UAP1L1	2.74491	8.99903e-29	1.90447e-24	protein_coding
NEURL3	5.13517	2.03129e-24	4.29861e-20	protein_coding
TNFAIP3	3.19378	6.36134e-20	1.34612e-15	protein_coding
TBX4	2.95549	2.19165e-16	4.63753e-12	protein_coding
AKNA	2.96619	5.63957e-15	1.19311e-10	protein_coding
PIM1	3.12881	2.77277e-14	5.86524e-10	protein_coding
LRRC8D	2.53767	1.22378e-13	2.58829e-09	protein_coding
RAB3IL1	2.46926	1.04642e-12	2.21286e-08	protein_coding
HLA-K	3.17854	6.7544e-12	1.42795e-07	unprocessed_pseudogene
NR1D2	2.11634	7.68065e-12	1.62369e-07	protein_coding
AC022506.1	3.70322	1.05328e-11	2.22653e-07	protein_coding
DDIT3	3.27236	2.84211e-11	6.00764e-07	protein_coding
KLHL24	2.78496	3.04854e-11	6.44369e-07	protein_coding
RFX3	2.14251	5.68218e-11	1.20093e-06	protein_coding
RELB	2.2762	7.59987e-11	1.60608e-06	protein_coding
FNIP1	1.86362	8.64329e-11	1.82633e-06	protein_coding
GAB2	2.53629	9.33996e-11	1.97335e-06	protein_coding
BCL2L11	1.69521	1.05571e-10	2.2304e-06	protein_coding
MAB21L4	2.28837	1.13794e-10	2.40401e-06	protein_coding
SLC44A2	2.6677	3.03697e-10	6.41469e-06	protein_coding
PATL1	1.88048	4.66317e-10	9.84767e-06	protein_coding
STC2	2.70477	5.12278e-10	1.08178e-05	protein_coding
INHBE	2.57405	7.09636e-10	1.49825e-05	protein_coding
CREBRF	2.3474	7.66388e-10	1.61792e-05	protein_coding
RHOT1	1.62624	1.77014e-09	3.73589e-05	protein_coding
PPARGC1A	3.39433	2.1431e-09	4.52258e-05	protein_coding
FAXDC2	1.94701	3.00131e-09	6.33306e-05	protein_coding
SECTM1	2.60398	6.55393e-09	0.000138248	protein_coding
CRTC3	1.61395	7.76085e-09	0.0001637	protein_coding
NR1D1	2.84501	8.15441e-09	0.000171993	protein_coding
GNA13	1.64669	8.43909e-09	0.000177989	protein_coding
NAPB	1.82556	8.69701e-09	0.00018342	protein_coding
DAGLA	2.04729	1.0817e-08	0.000228109	protein_coding
PHF3	1.81948	1.56433e-08	0.000329777	protein_coding
R3HDM2	1.55519	1.68258e-08	0.00035467	protein_coding
ZCCHC8	1.75869	1.95549e-08	0.00041214	protein_coding
THAP9-AS1	2.17685	1.96703e-08	0.000414551	lncRNA
BBC3	1.66305	2.09496e-08	0.000441491	protein_coding
DBP	1.57313	2.22922e-08	0.00046974	protein_coding
CTH	2.10602	2.22986e-08	0.000469853	protein_coding
PLEKHG3	1.82699	2.3776e-08	0.000500936	protein_coding
BCL3	1.50183	2.68208e-08	0.000565034	protein_coding
LRIG2	1.52382	3.05108e-08	0.000642588	protein_coding
PIK3IP1	2.37132	3.21092e-08	0.000676187	protein_coding
GXYLT2	1.66012	3.21104e-08	0.000676187	protein_coding
DCAF17	1.68246	3.338e-08	0.000702848	protein_coding
ICAM1	1.52731	3.93921e-08	0.000829283	protein_coding
AC026461.2	3.61348	4.20166e-08	0.000884449	lncRNA
RNF19A	1.61653	4.35539e-08	0.000916766	protein_coding
DMXL1	1.64722	4.7992e-08	0.00101004	protein_coding
SHPK	2.36365	5.29695e-08	0.00111469	protein_coding
UHRF1BP1	1.57905	5.32031e-08	0.00111955	protein_coding
AC093423.3	3.77418	6.45753e-08	0.00135873	protein_coding
MRPS31P5	2.18655	6.56346e-08	0.00138095	transcribed_unprocessed_pseudogene
KLHDC10	1.50531	7.52138e-08	0.00158235	protein_coding
YPEL2	2.27689	7.53889e-08	0.00158596	protein_coding
ELF3	1.71497	9.5317e-08	0.00200471	protein_coding
SLC30A1	1.74895	9.83632e-08	0.00206868	protein_coding
SPICE1	2.27367	1.21271e-07	0.00254984	protein_coding
AMHR2	2.81334	1.48174e-07	0.00311492	protein_coding
NFATC2	1.77978	1.5591e-07	0.00327722	protein_coding
KIAA1958	1.7356	1.81947e-07	0.00382343	protein_coding
HBP1	1.79919	1.85584e-07	0.00389967	protein_coding
SH3BP2	1.79065	2.12504e-07	0.00446407	protein_coding
TUFT1	1.70281	2.16591e-07	0.00454971	protein_coding
GADD45B	2.71974	2.24527e-07	0.00471619	protein_coding
AL158066.1	2.06999	2.28849e-07	0.00480628	lncRNA
UVRAG	1.58998	2.29747e-07	0.00482492	protein_coding
AC010186.2	2.15987	2.33379e-07	0.00490095	transcribed_unprocessed_pseudogene
RARA	1.68545	2.43708e-07	0.00511713	protein_coding
AF127577.4	2.14898	2.5501e-07	0.00535418	lncRNA
AL691482.3	1.65457	2.68627e-07	0.00563982	lncRNA
MT1B	3.42641	2.723e-07	0.00571666	protein_coding
ZMIZ1	1.60394	2.90873e-07	0.00610542	protein_coding
BMF	1.99595	3.00445e-07	0.00630573	protein_coding
TESK2	2.07019	3.05034e-07	0.00640144	protein_coding
PALMD	1.5927	3.4887e-07	0.0073193	protein_coding
GADD45G	2.95415	3.65366e-07	0.00766428	protein_coding
MTHFD2	1.7395	4.14429e-07	0.00869099	protein_coding
SIK1B	1.80754	4.61834e-07	0.00968373	protein_coding
SEC24B	1.70728	4.86982e-07	0.0102096	protein_coding
ASNSP1	3.3247	5.12375e-07	0.0107389	transcribed_unprocessed_pseudogene
AC036108.2	3.96492	5.18303e-07	0.0108626	lncRNA
LRIG3	2.22102	5.45242e-07	0.0114266	protein_coding
PACS1	1.71059	5.83398e-07	0.0122245	protein_coding
ZNF697	1.76069	5.87173e-07	0.012303	protein_coding
STBD1	1.86662	6.19061e-07	0.0129687	protein_coding
CPEB4	2.01441	6.20245e-07	0.0129929	protein_coding
AC055811.2	1.99107	6.30021e-07	0.0131971	protein_coding
CNNM2	1.64095	7.17001e-07	0.0150133	protein_coding
PITPNM2	1.89802	7.24021e-07	0.0151596	protein_coding
AC119674.2	2.08525	8.88892e-07	0.0186063	protein_coding
FAM47E-STBD1	1.79189	1.02713e-06	0.0214948	protein_coding
AQP7	3.1367	1.1093e-06	0.0232111	protein_coding
AQP7	3.1367	1.1093e-06	0.0232111	protein_coding
SLC38A3	1.76325	1.13757e-06	0.023799	protein_coding
AC027796.3	2.35871	1.17095e-06	0.0244917	protein_coding
IRF1	1.61154	1.17416e-06	0.0245576	protein_coding
NFIL3	1.96446	1.30331e-06	0.0272509	protein_coding
MTMR3	1.50365	1.34742e-06	0.0281719	protein_coding
OCLN	1.61065	1.40591e-06	0.029392	protein_coding
PI4KAP2	1.51684	1.55684e-06	0.0325395	transcribed_unitary_pseudogene
JMY	1.87435	1.60959e-06	0.0336373	protein_coding
PPP1R3E	2.47765	1.61783e-06	0.0338079	protein_coding
KLF15	1.9279	1.62793e-06	0.0340172	protein_coding
COX10	1.50755	1.8122e-06	0.0378531	protein_coding
PAWR	1.52324	1.83868e-06	0.0384045	protein_coding
MT2P1	2.12801	1.88057e-06	0.0392738	processed_pseudogene
FOXN3	1.55385	1.89345e-06	0.039541	protein_coding
AMOTL2	1.56488	2.19789e-06	0.0458897	protein_coding
ARRDC3	1.5557	2.23447e-06	0.0466467	protein_coding
RAD52	1.51287	2.32858e-06	0.0485998	protein_coding
AC092821.3	2.09773	2.36152e-06	0.0492849	lncRNA
AC018638.5	2.33779	2.441e-06	0.0509338	processed_pseudogene
ATF3	1.87632	2.70942e-06	0.0565213	protein_coding
MBNL2	1.68853	2.97805e-06	0.0621042	protein_coding
BHLHE40	2.76103	3.42396e-06	0.0713862	protein_coding
C5AR1	7.07048	3.43366e-06	0.0715849	protein_coding
C2orf15	1.87247	3.71953e-06	0.0775299	protein_coding
LRP5L	2.71269	4.0416e-06	0.0842229	protein_coding
DIO1	2.72922	5.1389e-06	0.107002	protein_coding
PCIF1	1.71578	5.1506e-06	0.107241	protein_coding
NUPR1	1.74632	5.35772e-06	0.111526	protein_coding
SYBU	1.94047	5.40261e-06	0.11245	protein_coding
ZNF16	1.67358	5.59014e-06	0.116331	protein_coding
ZFYVE9	1.63412	5.70893e-06	0.118791	protein_coding
SNTB1	1.50973	6.18137e-06	0.128585	protein_coding
TMEM150B	2.14578	6.20796e-06	0.129132	protein_coding
AC009879.3	2.5812	6.79585e-06	0.14132	protein_coding
IL34	2.0566	6.90821e-06	0.143649	protein_coding
GCOM1	1.73106	7.65095e-06	0.159033	protein_coding
C5orf34	1.79285	8.13325e-06	0.169009	protein_coding
VPS11	1.54286	8.13859e-06	0.169112	protein_coding
GPCPD1	1.67485	8.38072e-06	0.174118	protein_coding
ZNF460	2.36855	8.39796e-06	0.174468	protein_coding
AC129492.4	2.47314	8.49921e-06	0.176554	protein_coding
DESI2	1.55042	9.06546e-06	0.188226	protein_coding
MT-ND5	1.94185	9.20891e-06	0.191177	protein_coding
TNFRSF14	1.68771	9.36578e-06	0.194415	protein_coding
TBCK	1.5419	9.43384e-06	0.195818	protein_coding
CAPN5	1.90912	9.6207e-06	0.199668	protein_coding
PPP1R15A	1.79791	9.90749e-06	0.20557	protein_coding
IFIT3	1.8818	1.13205e-05	0.234719	protein_coding
EPB41L4A-AS1	1.57669	1.22815e-05	0.254509	lncRNA
FOXN2	1.80559	1.2916e-05	0.267594	protein_coding
AC112128.1	1.89702	1.31779e-05	0.272981	protein_coding
SEPT7P2	1.64638	1.41931e-05	0.293897	transcribed_unprocessed_pseudogene
SH2B3	1.50602	1.49911e-05	0.310316	protein_coding
PLPP3	1.51483	1.52975e-05	0.316611	protein_coding
AC019080.1	1.76885	1.63217e-05	0.337746	lncRNA
ST6GALNAC4	1.70577	1.64271e-05	0.339894	protein_coding
AL137129.1	1.68039	1.74947e-05	0.361861	lncRNA
ZNF442	2.25816	1.82203e-05	0.376777	protein_coding
SLC16A6	2.33795	1.89843e-05	0.39248	protein_coding
PDZK1IP1	2.63095	2.00545e-05	0.414427	protein_coding
FSD1L	1.7483	2.04672e-05	0.422853	protein_coding
SLC7A11	1.83732	2.10957e-05	0.435753	protein_coding
AC073869.1	1.5587	2.3997e-05	0.495467	transcribed_processed_pseudogene
CHST3	1.76171	2.60989e-05	0.53876	protein_coding
AC008758.1	2.27266	2.62893e-05	0.542664	protein_coding
TMEM200A	1.64625	2.63495e-05	0.54388	protein_coding
RF01956	3.09471	2.78316e-05	0.574193	misc_RNA
RNF169	1.57328	2.84668e-05	0.587212	protein_coding
AC013275.1	3.56618	3.32478e-05	0.685005	lncRNA
INTS12	1.54874	3.75004e-05	0.77187	protein_coding
ELMSAN1	1.59243	4.09513e-05	0.842368	protein_coding
LINC02246	1.91413	4.1084e-05	0.845057	lncRNA
NUAK2	2.11007	4.12527e-05	0.848486	protein_coding
MT-RNR2	1.62021	4.24916e-05	0.873671	Mt_rRNA
BIRC3	2.19813	4.34827e-05	0.893787	protein_coding
CBX4	1.59599	4.82425e-05	0.991142	protein_coding
AC097359.2	1.89965	4.85647e-05	0.997714	lncRNA
AC010186.4	2.2149	5.11424e-05	1	lncRNA
ZNF385C	2.33167	5.26039e-05	1	protein_coding
MT1G	2.59718	5.38416e-05	1	protein_coding
AC125232.2	1.94032	5.60989e-05	1	lncRNA
PLEKHM3	1.5878	5.77077e-05	1	protein_coding
SMTNL2	3.25453	5.90887e-05	1	protein_coding
TIMM23B	1.7166	6.27358e-05	1	protein_coding
COLGALT2	1.9909	6.45671e-05	1	protein_coding
LINC01473	6.3909	6.81075e-05	1	lncRNA
IFIH1	1.68995	6.81185e-05	1	protein_coding
RSC1A1	1.58609	6.84381e-05	1	protein_coding
IFIT1	1.52601	6.99284e-05	1	protein_coding
AC018630.2	2.07657	7.03632e-05	1	protein_coding
LRRC37B	1.58653	7.11931e-05	1	protein_coding
ANKRD33B	1.78082	8.38903e-05	1	protein_coding
C1orf210	2.2455	8.5755e-05	1	protein_coding
HERC3	1.91809	8.63129e-05	1	protein_coding
CDON	1.55108	9.19326e-05	1	protein_coding
ITFG2	1.53875	9.80946e-05	1	protein_coding
VEGFA	1.65783	9.9428e-05	1	protein_coding
AC138696.1	1.6871	0.000105991	1	protein_coding
SLC6A9	1.51602	0.000109568	1	protein_coding
LINC01572	2.00706	0.000114679	1	lncRNA
C2orf27A	1.71891	0.00012127	1	transcribed_unprocessed_pseudogene
DOP1B	1.52413	0.000121894	1	protein_coding
AC137834.1	2.18264	0.000125223	1	protein_coding
HEATR5B	1.71688	0.000131534	1	protein_coding
MT-ND4	1.90646	0.000134542	1	protein_coding
MT1CP	3.67344	0.000145758	1	transcribed_unprocessed_pseudogene
RND1	1.70327	0.000145828	1	protein_coding
SLCO2A1	1.69074	0.000151954	1	protein_coding
PIM3	1.66159	0.000166064	1	protein_coding
CCT6P1	1.74013	0.00017199	1	transcribed_unprocessed_pseudogene
GDF15	1.73343	0.000181567	1	protein_coding
AC010186.3	2.2372	0.000182781	1	lncRNA
BBS12	1.92049	0.000189124	1	protein_coding
LRCH1	1.56926	0.000192104	1	protein_coding
CHST15	1.75689	0.000192392	1	protein_coding
PEG13	3.56071	0.000192892	1	lncRNA
NR3C2	2.78546	0.000199471	1	protein_coding
NUAK1	1.83065	0.00020783	1	protein_coding
AQP4	2.37361	0.000208155	1	protein_coding
NRP2	1.70732	0.000211402	1	protein_coding
CD55	1.75563	0.000218147	1	protein_coding
CELSR2	1.62365	0.000227097	1	protein_coding
BATF2	1.60411	0.00022835	1	protein_coding
AC125232.1	1.96948	0.000234335	1	unprocessed_pseudogene
WHAMMP3	2.24624	0.000237079	1	transcribed_unprocessed_pseudogene
ZNF433	1.97793	0.000240347	1	protein_coding
AL353743.1	2.00246	0.000246195	1	transcribed_unprocessed_pseudogene
GPR37	1.7421	0.000254413	1	protein_coding
CBLB	1.52323	0.000255895	1	protein_coding
SYDE2	1.72543	0.000273906	1	protein_coding
TBC1D19	1.51599	0.000282492	1	protein_coding
GPR146	2.46615	0.000304677	1	protein_coding
PXK	1.713	0.000317332	1	protein_coding
AC092620.1	1.64265	0.000336556	1	lncRNA
EBF3	2.48585	0.000347131	1	protein_coding
FBXO32	2.24941	0.000358541	1	protein_coding
AL512785.2	2.58651	0.000399946	1	protein_coding
SLC3A2	1.54446	0.0004029	1	protein_coding
SEMA3D	1.84175	0.000407423	1	protein_coding
LRRC37A2	3.10731	0.000419948	1	protein_coding
ZNF709	2.04022	0.000427541	1	protein_coding
ALX1	1.70561	0.000444579	1	protein_coding
PVT1	1.77597	0.00045352	1	lncRNA
TET1	1.53033	0.000496808	1	protein_coding
AC021218.1	2.17256	0.000498401	1	lncRNA
ARSG	1.71217	0.000499599	1	protein_coding
BAIAP2L2	1.67536	0.000503543	1	protein_coding
CYP3A7-CYP3A51P	2.6584	0.000537301	1	protein_coding
MT1X	1.57295	0.000542814	1	protein_coding
RAB3A	2.30282	0.0005637	1	protein_coding
MBOAT1	2.19125	0.000597681	1	protein_coding
MT1H	2.39215	0.000604397	1	protein_coding
HSPBAP1	1.56484	0.000619254	1	protein_coding
AC039056.2	6.85423	0.00063756	1	lncRNA
AC026461.1	1.55793	0.000667639	1	lncRNA
SULT1C4	1.92347	0.000694876	1	protein_coding
TWF1P1	2.09179	0.000774158	1	processed_pseudogene
AC019117.3	1.67301	0.000789721	1	protein_coding
CYP19A1	1.60479	0.000810604	1	protein_coding
ZSCAN31	1.84011	0.000853249	1	protein_coding
AC005324.3	1.52185	0.000858459	1	protein_coding
PRH1	1.92202	0.000871126	1	protein_coding
RNU6-574P	6.39941	0.0008969	1	snRNA
WASH7P	1.81805	0.000925562	1	unprocessed_pseudogene
FIBIN	2.44345	0.000957029	1	protein_coding
MR1	1.78883	0.000967573	1	protein_coding
AC008622.2	1.74162	0.000969745	1	lncRNA
ZNF441	1.76241	0.000974104	1	protein_coding

## Sheet: SNU423_Downregulated 
Gene name	LogFC	pValue	FDR	Biotype
HMGB3	-1.96325	1.02942e-15	2.17814e-11	protein_coding
PCNA	-2.24918	1.61017e-15	3.40679e-11	protein_coding
SDF2L1	-2.03901	1.65569e-15	3.50294e-11	protein_coding
ETV5	-2.98545	1.36854e-14	2.89515e-10	protein_coding
FEN1	-2.49882	1.46344e-14	3.09577e-10	protein_coding
GATD3A	-4.68836	4.96895e-14	1.05103e-09	protein_coding
H2AFX	-2.17683	5.05827e-14	1.06988e-09	protein_coding
CRELD2	-1.75878	5.52571e-13	1.16863e-08	protein_coding
DUSP6	-4.64671	6.65967e-13	1.40839e-08	protein_coding
DKK1	-3.38703	2.38292e-12	5.03892e-08	protein_coding
AL139260.3	-1.76175	2.53815e-12	5.36691e-08	protein_coding
NDUFAF8	-1.75585	5.88167e-12	1.24362e-07	protein_coding
TLNRD1	-1.98631	6.12364e-12	1.29472e-07	protein_coding
CCR6	-3.82813	6.24825e-12	1.321e-07	protein_coding
CDC25A	-2.18076	3.09753e-11	6.54695e-07	protein_coding
AL365181.3	-1.99178	6.26399e-11	1.32383e-06	lncRNA
BRI3BP	-1.56596	7.78443e-11	1.64501e-06	protein_coding
PAQR4	-2.3046	7.94375e-11	1.67859e-06	protein_coding
SPRY4	-3.7902	9.31232e-11	1.9676e-06	protein_coding
E2F2	-2.38685	1.84605e-10	3.89977e-06	protein_coding
NR0B2	-2.95586	2.37558e-10	5.01818e-06	protein_coding
MANF	-1.98571	2.69356e-10	5.6896e-06	protein_coding
RASSF7	-1.38398	3.50837e-10	7.41004e-06	protein_coding
LINC01521	-3.0268	3.83882e-10	8.1076e-06	lncRNA
C11orf98	-1.59277	3.98089e-10	8.40723e-06	protein_coding
MYCBP	-1.65342	5.45376e-10	1.15162e-05	protein_coding
POLR2L	-1.68993	5.86095e-10	1.23754e-05	protein_coding
AC015813.2	-1.81241	6.41132e-10	1.35369e-05	protein_coding
LBHD1	-1.58216	7.11273e-10	1.50164e-05	protein_coding
MARCKSL1	-1.50756	8.78561e-10	1.85464e-05	protein_coding
ITPRIPL1	-3.43037	9.71429e-10	2.05059e-05	protein_coding
RBM38	-1.54301	1.09314e-09	2.3074e-05	protein_coding
CPSF6	-1.48129	1.21056e-09	2.55513e-05	protein_coding
PPP1R14B	-1.76037	1.63866e-09	3.45855e-05	protein_coding
CCNE1	-2.05289	2.06352e-09	4.35486e-05	protein_coding
EXOSC4	-1.40071	2.36756e-09	4.99604e-05	protein_coding
CASC19	-2.74599	3.71166e-09	7.8316e-05	lncRNA
AP001505.1	-1.91079	4.61038e-09	9.72744e-05	lncRNA
SPRED1	-2.09997	5.64912e-09	0.00011918	protein_coding
HSPA1A	-2.14065	6.12285e-09	0.000129168	protein_coding
DNAJA1	-1.68562	6.25497e-09	0.000131949	protein_coding
CHAF1B	-1.47751	1.00677e-08	0.000212317	protein_coding
TM2D2	-1.40101	1.19168e-08	0.00025129	protein_coding
SRSF1	-1.71345	1.28278e-08	0.000270487	protein_coding
MBD3	-1.60936	1.31281e-08	0.000276806	protein_coding
CENPW	-1.54342	1.39648e-08	0.000294434	protein_coding
AP1S3	-2.09685	1.45166e-08	0.000306054	protein_coding
SFN	-2.99091	1.53618e-08	0.000323857	protein_coding
COX16	-1.4871	1.58891e-08	0.000334943	protein_coding
MIR1244-3	-1.9354	1.72135e-08	0.000362825	miRNA
TARDBP	-1.35048	1.83042e-08	0.000385797	protein_coding
POP5	-1.32032	2.13593e-08	0.000450105	protein_coding
MSH6	-1.53524	2.33673e-08	0.000492349	protein_coding
CLDN2	-2.34662	2.56338e-08	0.000540052	protein_coding
UQCC3	-1.84601	2.68494e-08	0.000565608	protein_coding
AL034430.1	-1.4201	2.71636e-08	0.000572201	protein_coding
MRPL51	-1.38313	2.77919e-08	0.000585408	protein_coding
FDPS	-1.42542	2.85955e-08	0.000602306	protein_coding
LLPH	-1.36865	2.91931e-08	0.000614864	protein_coding
TAF15	-1.62324	3.17963e-08	0.000669629	protein_coding
DLEU2	-1.80242	3.25163e-08	0.000684697	lncRNA
MRPS12	-1.41298	3.48382e-08	0.000733518	protein_coding
AL049840.4	-2.272	3.68551e-08	0.000775911	lncRNA
HNRNPM	-1.55197	4.19075e-08	0.000882194	protein_coding
SYNJ2BP-COX16	-1.40087	4.53196e-08	0.000953888	protein_coding
GALNT4	-1.76074	4.85965e-08	0.00102271	protein_coding
AC130324.3	-3.81969	6.21227e-08	0.00130719	lncRNA
PRADC1	-1.58963	6.84667e-08	0.00144047	protein_coding
SAFB2	-1.51204	8.05566e-08	0.00169459	protein_coding
SAC3D1	-1.36628	8.61474e-08	0.00181211	protein_coding
SFPQ	-1.62125	8.75694e-08	0.00184193	protein_coding
MIR1244-2	-1.75743	8.935e-08	0.0018793	miRNA
WNT3	-2.51724	1.17479e-07	0.00247057	protein_coding
WNT3	-2.51724	1.17479e-07	0.00247057	protein_coding
PYCR3	-2.1415	1.19178e-07	0.00250608	protein_coding
TIMM8A	-1.50916	1.23181e-07	0.00258987	protein_coding
PXMP2	-1.41496	1.27347e-07	0.00267735	protein_coding
CLSPN	-2.16393	1.53986e-07	0.00323695	protein_coding
HMGN3	-1.43191	1.63747e-07	0.00344148	protein_coding
HMGB1P6	-1.65402	1.75224e-07	0.00368251	processed_pseudogene
PPP1R14BP3	-1.41787	1.77743e-07	0.00373527	processed_pseudogene
GINS2	-1.41499	1.93203e-07	0.00405958	protein_coding
AL390195.1	-1.17988	1.98036e-07	0.00416055	lncRNA
DGCR8	-1.65264	2.04266e-07	0.00429121	protein_coding
ID1	-1.93417	2.28207e-07	0.00479325	protein_coding
HNRNPH3	-1.5484	2.28252e-07	0.00479398	protein_coding
SNRPE	-1.27018	2.36202e-07	0.00496001	protein_coding
CCDC137	-1.45129	2.3654e-07	0.00496687	protein_coding
AC026464.2	-1.51071	2.77852e-07	0.00583266	lncRNA
RPL36AL	-1.40423	3.04884e-07	0.0063986	protein_coding
MRTO4	-1.37327	3.14963e-07	0.0066095	protein_coding
RAB30-AS1	-2.00915	3.25757e-07	0.00683504	lncRNA
EBP	-1.42686	3.35653e-07	0.00704233	protein_coding
SRSF2	-1.56644	3.64791e-07	0.00765296	protein_coding
TEDC1	-1.54797	3.65073e-07	0.0076585	protein_coding
MGAT1	-1.21532	3.71506e-07	0.00779234	protein_coding
TMPO-AS1	-2.6447	3.9482e-07	0.00828096	lncRNA
MVD	-2.00798	3.96148e-07	0.00830841	protein_coding
MIR1244-1	-1.62493	4.25318e-07	0.00891892	miRNA
CYCS	-1.51103	4.89264e-07	0.0102569	protein_coding
CCDC85B	-1.65753	4.99165e-07	0.010464	protein_coding
CHRNA5	-2.20906	5.02718e-07	0.010538	protein_coding
CHPF2	-1.45128	5.03873e-07	0.0105617	protein_coding
H2AFZ	-1.52109	5.11201e-07	0.0107148	protein_coding
FAM111B	-2.33188	5.52172e-07	0.0115713	protein_coding
IGSF8	-1.24702	5.57392e-07	0.0116802	protein_coding
CANT1	-1.31056	6.0743e-07	0.0127269	protein_coding
SNRNP25	-1.41787	6.1046e-07	0.0127891	protein_coding
TUBA1C	-1.43476	6.41736e-07	0.0134418	protein_coding
IDI1	-2.20832	6.47109e-07	0.0135537	protein_coding
ACAT2	-1.69106	6.6194e-07	0.0138637	protein_coding
ING5	-1.12113	6.79309e-07	0.0142268	protein_coding
EIF4E2	-1.10048	6.88169e-07	0.0144116	protein_coding
ENDOG	-1.23976	6.90637e-07	0.0144626	protein_coding
HIBCH	-1.23451	7.16928e-07	0.0150125	protein_coding
POLR3K	-1.3498	7.65146e-07	0.0160199	protein_coding
COPS9	-1.33743	7.70012e-07	0.016121	protein_coding
GASAL1	-2.14588	7.78885e-07	0.016306	lncRNA
B3GAT3	-1.36832	8.89853e-07	0.0186255	protein_coding
POC1B-GALNT4	-1.61369	9.02915e-07	0.018898	protein_coding
DHRS4L2	-1.59785	1.01456e-06	0.0212336	protein_coding
MKKS	-1.20681	1.05552e-06	0.0220877	protein_coding
SPRY2	-1.51236	1.09438e-06	0.0228999	protein_coding
NDUFB2	-1.27631	1.12707e-06	0.0235806	protein_coding
P2RY11	-2.37657	1.14542e-06	0.0239622	protein_coding
METTL1	-1.27425	1.15274e-06	0.024113	protein_coding
AC135586.2	-1.25762	1.19764e-06	0.0250474	lncRNA
SERTAD1	-1.7762	1.21074e-06	0.0253202	protein_coding
SPC25	-1.2244	1.26068e-06	0.026362	protein_coding
ZBTB8OS	-1.63982	1.37677e-06	0.0287841	protein_coding
SPATA2L	-1.24593	1.51149e-06	0.0315932	protein_coding
LRRC45	-1.6614	1.59184e-06	0.0332695	protein_coding
RNASEH2C	-1.22035	1.59534e-06	0.0333411	protein_coding
NSDHL	-1.5742	1.70004e-06	0.0355223	protein_coding
MYDGF	-1.24204	1.71629e-06	0.0358601	protein_coding
GJA1	-2.19568	1.75043e-06	0.0365699	protein_coding
HSPE1	-1.65692	1.77425e-06	0.0370658	protein_coding
RPS26	-1.22837	1.98894e-06	0.041531	protein_coding
NDUFS5	-1.34142	2.13682e-06	0.0446168	protein_coding
AL450998.2	-1.98056	2.22993e-06	0.0465542	lncRNA
MIR671	-1.9596	2.23545e-06	0.0466649	miRNA
SAFB	-1.32559	2.31194e-06	0.0482571	protein_coding
AL117332.1	-2.16236	2.38834e-06	0.0498422	lncRNA
NDUFC2	-1.42933	2.42156e-06	0.0505331	protein_coding
DCAF13	-1.22635	2.43369e-06	0.0507839	protein_coding
CETN2	-1.2255	2.44775e-06	0.0510723	protein_coding
HMGB1	-1.3717	2.78881e-06	0.0581746	protein_coding
OTUD6B-AS1	-1.63364	2.81787e-06	0.0587751	lncRNA
SWSAP1	-2.01793	2.86146e-06	0.0596816	protein_coding
AC092647.5	-0.986509	2.90498e-06	0.0605863	protein_coding
TPM3P9	-1.8622	3.02601e-06	0.0631014	transcribed_processed_pseudogene
CMTM3	-1.29387	3.16837e-06	0.0660636	protein_coding
PSMA3	-1.20549	3.41644e-06	0.0712327	protein_coding
RNU6-8	-1.87096	3.44739e-06	0.0718677	snRNA
LIMD2	-1.30431	3.6052e-06	0.0751503	protein_coding
MIR7703	-1.34258	3.82493e-06	0.079723	miRNA
NHP2	-1.11484	3.92481e-06	0.0818008	protein_coding
ZNF124	-1.36138	4.03607e-06	0.0841116	protein_coding
AP001453.5	-1.39121	4.44052e-06	0.0925137	protein_coding
NDUFC2-KCTD14	-1.42084	4.47255e-06	0.0931766	protein_coding
UBE2S	-1.14605	4.53045e-06	0.0943738	protein_coding
MMP15	-1.18344	4.6031e-06	0.0958825	protein_coding
CCND3	-1.60884	4.80944e-06	0.100171	protein_coding
STMN1	-1.06646	4.81267e-06	0.100234	protein_coding
SPCS3	-0.986026	4.86497e-06	0.101318	protein_coding
EPOP	-1.61887	4.95855e-06	0.103262	protein_coding
SOX4	-1.5363	4.98942e-06	0.1039	protein_coding
RBM8A	-1.42541	5.01413e-06	0.104409	protein_coding
FKBP2	-1.38308	5.21868e-06	0.108648	protein_coding
WDR77	-1.13884	5.22374e-06	0.108748	protein_coding
GINS1	-1.3818	5.3064e-06	0.110463	protein_coding
AC009133.6	-1.13543	5.35778e-06	0.111526	protein_coding
C15orf62	-3.54703	5.40998e-06	0.112593	protein_coding
NUDT1	-1.09958	5.4733e-06	0.113905	protein_coding
POP4	-1.07726	5.69632e-06	0.118535	protein_coding
SLC39A3	-1.12351	5.84619e-06	0.121642	protein_coding
ZNF587B	-1.56763	5.94238e-06	0.123637	protein_coding
PTMA	-1.43334	6.05468e-06	0.125962	protein_coding
ARMC5	-1.3632	6.11679e-06	0.127247	protein_coding
TIMM8B	-1.42078	6.2259e-06	0.129499	protein_coding
INSIG1	-2.06861	6.55416e-06	0.136307	protein_coding
MESD	-1.12784	6.73395e-06	0.140039	protein_coding
TMEM102	-2.08711	7.04561e-06	0.146499	protein_coding
DNAJC22	-1.42561	7.07577e-06	0.147119	protein_coding
MVK	-1.504	7.26315e-06	0.151008	protein_coding
SLC6A8	-1.39521	7.62724e-06	0.158548	protein_coding
SPHK1	-1.27091	7.70988e-06	0.16025	protein_coding
CHST14	-1.35317	7.87604e-06	0.163696	protein_coding
MIER2	-1.07662	7.88135e-06	0.163798	protein_coding
HSPB11	-1.3882	7.8878e-06	0.163924	protein_coding
CBR1	-1.11065	8.07544e-06	0.167816	protein_coding
MIR22HG	-2.34475	8.22392e-06	0.170877	lncRNA
SNRPD1	-1.24806	8.27272e-06	0.171882	protein_coding
PSMG4	-1.36589	8.40475e-06	0.1746	protein_coding
SNRPF	-1.27485	8.57851e-06	0.178193	protein_coding
AL034430.2	-1.28133	8.69198e-06	0.180532	protein_coding
WDR34	-1.22422	8.80362e-06	0.182834	protein_coding
MRPL20	-1.03879	8.92149e-06	0.185264	protein_coding
MFSD5	-0.988383	9.05284e-06	0.187982	protein_coding
TUBA4A	-1.87847	9.05491e-06	0.188016	protein_coding
BUD23	-1.05246	9.0716e-06	0.188345	protein_coding
PMPCA	-1.11769	9.08517e-06	0.188617	protein_coding
RPA3	-1.20337	9.32391e-06	0.193555	protein_coding
SUB1	-1.26379	9.46887e-06	0.196536	protein_coding
LYAR	-1.22242	9.56489e-06	0.198519	protein_coding
MRPL17	-1.02149	9.64956e-06	0.200257	protein_coding
DDX46	-1.42376	9.69387e-06	0.201167	protein_coding
GINS3	-1.44651	9.87477e-06	0.204902	protein_coding
AL513165.2	-1.09092	9.99342e-06	0.207344	protein_coding
MRPS28	-1.27188	1.00487e-05	0.208481	protein_coding
TIMM17A	-1.05201	1.02153e-05	0.211926	protein_coding
HSPA5	-1.68969	1.0276e-05	0.213177	protein_coding
DTYMK	-1.054	1.07076e-05	0.222085	protein_coding
CARD9	-1.30204	1.07365e-05	0.222676	protein_coding
RAD51	-1.15868	1.07955e-05	0.223888	protein_coding
CHCHD7	-1.08846	1.11968e-05	0.232165	protein_coding
CMC2	-1.12459	1.13382e-05	0.235074	protein_coding
PSMG3	-1.12273	1.15838e-05	0.240143	protein_coding
RRP1	-0.964289	1.19212e-05	0.247103	protein_coding
RPS19BP1	-1.13419	1.21061e-05	0.250912	protein_coding
MRPL28	-0.979677	1.22072e-05	0.252994	protein_coding
INAFM1	-1.41247	1.22438e-05	0.253741	protein_coding
CCDC167	-1.40071	1.23801e-05	0.256527	protein_coding
DNLZ	-1.33721	1.29259e-05	0.267786	protein_coding
SEC61G	-1.22126	1.3493e-05	0.279481	protein_coding
AC120114.4	-1.16533	1.35035e-05	0.279684	protein_coding
TPRG1L	-1.24182	1.35963e-05	0.281594	protein_coding
C4orf48	-1.56203	1.37523e-05	0.284811	protein_coding
C11orf24	-1.02169	1.38089e-05	0.285968	protein_coding
TST	-1.28077	1.38526e-05	0.28686	protein_coding
AC012065.3	-1.91777	1.44213e-05	0.298594	lncRNA
CLIC1	-1.1366	1.45077e-05	0.300367	protein_coding
MRPS17	-0.936799	1.46382e-05	0.303041	protein_coding
GPATCH4	-1.36182	1.50339e-05	0.311186	protein_coding
ORAI2	-1.66438	1.61133e-05	0.333466	protein_coding
AC104113.1	-2.44322	1.65009e-05	0.341405	lncRNA
KLF2	-2.15049	1.67486e-05	0.346513	protein_coding
NAA38	-1.13	1.74165e-05	0.360279	protein_coding
SMIM4	-1.36982	1.75503e-05	0.362993	protein_coding
TOMM5	-1.19074	1.79149e-05	0.37048	protein_coding
CKS1B	-1.04139	1.82876e-05	0.378151	protein_coding
FABP5	-1.22503	1.85079e-05	0.382688	protein_coding
NDUFB3	-1.40093	1.88027e-05	0.388746	protein_coding
AC003002.2	-1.54969	1.97342e-05	0.407905	protein_coding
RANBP1	-1.09892	1.97767e-05	0.408764	protein_coding
GADD45GIP1	-1.09336	1.99536e-05	0.412381	protein_coding
IGFLR1	-1.2111	2.01581e-05	0.416547	protein_coding
IMP3	-1.13832	2.0304e-05	0.41952	protein_coding
NAT8	-2.14198	2.06849e-05	0.427329	protein_coding
LYSMD4	-1.50705	2.10259e-05	0.434353	protein_coding
MEX3A	-1.05296	2.18278e-05	0.450809	protein_coding
CDC6	-1.36053	2.3357e-05	0.482321	protein_coding
HAT1	-1.09421	2.43381e-05	0.502485	protein_coding
COX6C	-1.31253	2.44995e-05	0.505793	protein_coding
MED6	-0.992173	2.58803e-05	0.534273	protein_coding
GNG10	-1.02744	2.6636e-05	0.549688	protein_coding
MAT2A	-1.66883	2.70257e-05	0.557675	protein_coding
PET100	-1.41886	2.72143e-05	0.56154	protein_coding
LYPLA2	-1.03866	2.80084e-05	0.577814	protein_coding
AC092718.8	-1.16615	2.81565e-05	0.580841	protein_coding
BCL7C	-1.04127	2.86341e-05	0.590635	protein_coding
UQCRQ	-1.42493	2.88779e-05	0.595577	protein_coding
EEF1AKMT4	-1.46553	2.89954e-05	0.597973	protein_coding
LDLR	-1.59702	2.98031e-05	0.61448	protein_coding
ITGB1BP1	-1.05507	3.04951e-05	0.628717	protein_coding
COX17	-1.13445	3.05591e-05	0.630007	protein_coding
JPT1	-1.11534	3.09607e-05	0.638224	protein_coding
PARD6G	-1.23513	3.12351e-05	0.643849	protein_coding
AP005482.1	-2.04139	3.15049e-05	0.649316	lncRNA
GCSH	-1.16602	3.16862e-05	0.652989	protein_coding
MFSD12	-1.15702	3.19982e-05	0.659386	protein_coding
ZBTB7A	-1.62133	3.22561e-05	0.66467	protein_coding
AP001458.2	-1.31034	3.33217e-05	0.686494	protein_coding
AURKAIP1	-1.1796	3.33895e-05	0.687857	protein_coding
HRAS	-1.05254	3.34196e-05	0.688444	protein_coding
ADAT3	-1.15412	3.35051e-05	0.690172	protein_coding
SGTA	-1.05256	3.3563e-05	0.691331	protein_coding
NOP16	-1.35915	3.42166e-05	0.70476	protein_coding
AC092718.3	-1.15474	3.44755e-05	0.710056	protein_coding
NDUFB1	-1.39749	3.46823e-05	0.714246	protein_coding
SLIRP	-1.21042	3.51262e-05	0.723353	protein_coding
LRR1	-0.948427	3.51643e-05	0.724103	protein_coding
GCHFR	-1.10134	3.5169e-05	0.724164	protein_coding
AK1	-1.0737	3.57413e-05	0.735841	protein_coding
TIMM10	-0.930398	3.64476e-05	0.750273	protein_coding
FABP5P7	-1.27409	3.87184e-05	0.796901	processed_pseudogene
TIPIN	-1.09235	3.95188e-05	0.813258	protein_coding
AC068631.3	-1.51065	3.95971e-05	0.814829	processed_pseudogene
PAFAH1B3	-0.966433	4.04164e-05	0.831527	protein_coding
UNKL	-1.13599	4.13531e-05	0.850509	protein_coding
CCAR1	-1.45922	4.15845e-05	0.855186	protein_coding
HILPDA	-1.1183	4.18092e-05	0.859764	protein_coding
EGR1	-4.02361	4.20948e-05	0.865596	protein_coding
ROMO1	-1.42816	4.21436e-05	0.866556	protein_coding
DHRS4	-1.099	4.28533e-05	0.881021	protein_coding
EXOSC6	-1.24303	4.2914e-05	0.882225	protein_coding
HMGN1	-1.07004	4.33832e-05	0.891785	protein_coding
YWHAB	-1.00463	4.41363e-05	0.907134	protein_coding
CCNE2	-1.81577	4.62083e-05	0.94958	protein_coding
RN7SL731P	-1.87894	4.78484e-05	0.98314	misc_RNA
HES6	-1.21859	5.0132e-05	1	protein_coding
ATP5PD	-1.21201	5.06234e-05	1	protein_coding
HMOX2	-1.1098	5.07871e-05	1	protein_coding
OAZ2	-0.931981	5.13237e-05	1	protein_coding
TMEM104	-1.08472	5.1683e-05	1	protein_coding
TYMP	-1.59819	5.17689e-05	1	protein_coding
TRIAP1	-1.18276	5.34391e-05	1	protein_coding
AC024592.3	-1.17376	5.43249e-05	1	protein_coding
KANK2	-1.21032	5.57845e-05	1	protein_coding
TADA2A	-1.06219	5.65915e-05	1	protein_coding
NDUFA11	-1.19829	5.73354e-05	1	protein_coding
NUDT8	-1.06639	5.77057e-05	1	protein_coding
SOD1	-1.00811	5.77871e-05	1	protein_coding
RBBP6	-1.50716	5.78002e-05	1	protein_coding
CHSY1	-1.36291	5.79822e-05	1	protein_coding
NDUFS6	-1.19965	5.80231e-05	1	protein_coding
BAZ1A	-1.30812	5.92975e-05	1	protein_coding
PAGR1	-1.03744	5.94939e-05	1	protein_coding
ZNF629	-1.23343	6.04336e-05	1	protein_coding
UBAC2-AS1	-1.59807	6.04387e-05	1	lncRNA
FDX1	-1.04991	6.10689e-05	1	protein_coding
ATP5MD	-1.29278	6.15023e-05	1	protein_coding
COMMD4	-0.883834	6.1992e-05	1	protein_coding
MRPL13	-1.14756	6.2285e-05	1	protein_coding
NME1	-1.0628	6.2317e-05	1	protein_coding
EBNA1BP2	-1.25968	6.33164e-05	1	protein_coding
CEP78	-1.12112	6.42155e-05	1	protein_coding
MRPL54	-1.20128	6.58912e-05	1	protein_coding
SCAND1	-1.07975	6.63496e-05	1	protein_coding
C4orf3	-1.08154	6.84124e-05	1	protein_coding
ALYREF	-1.22503	6.89657e-05	1	protein_coding
HYAL2	-1.17245	7.10232e-05	1	protein_coding
GLTPD2	-1.23362	7.13892e-05	1	protein_coding
APRT	-1.04252	7.22567e-05	1	protein_coding
MCM4	-1.16006	7.25154e-05	1	protein_coding
JMJD6	-0.888082	7.44269e-05	1	protein_coding
ELMOD2	-1.05898	7.61673e-05	1	protein_coding
HIST1H1C	-1.40817	7.63138e-05	1	protein_coding
EIF4G1	-0.986335	7.80286e-05	1	protein_coding
C20orf27	-0.900753	7.81506e-05	1	protein_coding
NDUFA13	-1.33706	7.84536e-05	1	protein_coding
MED31	-1.54184	7.93765e-05	1	protein_coding
CCDC71L	-3.34346	8.02708e-05	1	protein_coding
AC020915.1	-0.901704	8.11002e-05	1	lncRNA
TUBB4B	-1.28692	8.21752e-05	1	protein_coding
POLR3H	-1.04951	8.26636e-05	1	protein_coding
FAM173A	-1.13156	8.35338e-05	1	protein_coding
TFPT	-1.14292	8.40774e-05	1	protein_coding
AC011448.1	-1.32991	8.4388e-05	1	protein_coding
ANP32A	-1.12956	8.51881e-05	1	protein_coding
SYNGR2	-1.03561	8.60401e-05	1	protein_coding
CYP26B1	-1.88203	8.70939e-05	1	protein_coding
ELOB	-1.24171	8.79165e-05	1	protein_coding
PWWP3A	-0.956342	8.80561e-05	1	protein_coding
TIMM50	-0.891892	8.84355e-05	1	protein_coding
SQLE	-1.73956	9.00803e-05	1	protein_coding
TARSL2	-1.24852	9.16648e-05	1	protein_coding
CHMP6	-1.08047	9.27979e-05	1	protein_coding
UHRF1	-1.59938	9.43748e-05	1	protein_coding
AC008763.2	-1.19176	9.48924e-05	1	protein_coding
MAP2K3	-1.12522	9.56539e-05	1	protein_coding
TAF7	-0.963762	9.62458e-05	1	protein_coding
POP7	-0.94027	9.70287e-05	1	protein_coding
FDFT1	-1.28086	9.71995e-05	1	protein_coding
METTL2B	-0.991543	9.7306e-05	1	protein_coding
C1GALT1C1	-1.0542	9.74606e-05	1	protein_coding
SLC38A10	-0.921188	0.000101336	1	protein_coding
SMIM12	-0.827525	0.000101607	1	protein_coding
GJB1	-1.19702	0.000103555	1	protein_coding
PSMA5	-0.838812	0.000103909	1	protein_coding
MRPL47	-0.898872	0.000104442	1	protein_coding
AL161772.1	-2.22792	0.000105003	1	lncRNA
ATF5	-1.18577	0.000105952	1	protein_coding
AC020915.5	-0.859102	0.000107014	1	protein_coding
AMIGO3	-1.9898	0.000107214	1	protein_coding
TCIM	-1.31639	0.000108093	1	protein_coding
GP1BB	-1.43094	0.00010857	1	protein_coding
NOP56	-1.15123	0.00010864	1	protein_coding
ATP5F1E	-1.1874	0.000108762	1	protein_coding
RMI2	-1.39748	0.000108793	1	protein_coding
CENPX	-1.25935	0.000109208	1	protein_coding
SREBF1	-1.27745	0.000109356	1	protein_coding
COX14	-1.01834	0.000110303	1	protein_coding
ZNF749	-1.11519	0.000112254	1	protein_coding
TCTEX1D2	-1.51225	0.000112598	1	protein_coding
RHOB	-1.16197	0.000113758	1	protein_coding
LZIC	-0.93331	0.000117215	1	protein_coding
ZNF559	-1.38351	0.000117568	1	protein_coding
PXN-AS1	-1.12327	0.000120153	1	lncRNA
HAUS7	-1.01609	0.000120175	1	protein_coding
TMEM52	-1.60637	0.000120727	1	protein_coding
BCL2L12	-0.866177	0.000121204	1	protein_coding
UNG	-1.08783	0.000122192	1	protein_coding
POLE4	-1.05303	0.000122212	1	protein_coding
HSP90AA1	-1.82889	0.000123005	1	protein_coding
AC016405.3	-2.59509	0.000123196	1	lncRNA
TREX2	-1.01373	0.000125781	1	protein_coding
UBE2J2	-1.01159	0.000126491	1	protein_coding
POLR2I	-1.04549	0.000127575	1	protein_coding
NOSIP	-1.06672	0.000128585	1	protein_coding
RBM14	-1.00105	0.00013093	1	protein_coding
PGP	-1.09148	0.000132472	1	protein_coding
CCM2	-1.08996	0.000138509	1	protein_coding
KIF9	-1.19894	0.00013959	1	protein_coding
KNOP1	-1.01706	0.000140733	1	protein_coding
NUDC	-1.17184	0.000143406	1	protein_coding
MMD	-1.2826	0.000143565	1	protein_coding
DSCC1	-1.03221	0.00014381	1	protein_coding
B3GALT6	-1.39092	0.000146232	1	protein_coding
SETMAR	-1.16264	0.000147791	1	protein_coding
MAEA	-0.865627	0.000148048	1	protein_coding
LAMTOR4	-1.06518	0.00015309	1	protein_coding
PIGW	-1.19677	0.000153661	1	protein_coding
LAPTM4B	-0.849949	0.000153954	1	protein_coding
EMILIN1	-3.03089	0.000154646	1	protein_coding
ATAD3B	-1.20909	0.000156982	1	protein_coding
CHCHD1	-1.08365	0.000157946	1	protein_coding
SLC19A1	-1.01408	0.000162216	1	protein_coding
ELMO3	-1.92801	0.000164027	1	protein_coding
NDUFAB1	-1.02225	0.000164371	1	protein_coding
EEF2KMT	-0.999495	0.000164415	1	protein_coding
KIAA0930	-0.863039	0.000174551	1	protein_coding
TFB2M	-0.798084	0.000176647	1	protein_coding
RRP7A	-0.863827	0.000182664	1	protein_coding
DKC1	-0.892851	0.000183333	1	protein_coding
SIVA1	-1.1705	0.000183459	1	protein_coding
MARCKS	-1.04807	0.000184865	1	protein_coding
MYL6	-1.29277	0.000185783	1	protein_coding
HSPA1B	-1.57961	0.000186405	1	protein_coding
PUS7	-1.28413	0.000189023	1	protein_coding
MICOS10	-1.03437	0.000190408	1	protein_coding
SELENOH	-1.15873	0.000193631	1	protein_coding
HMCES	-0.778825	0.000198681	1	protein_coding
ARVCF	-0.995368	0.000200033	1	protein_coding
NES	-1.63466	0.000204315	1	protein_coding
LIMD1	-0.73751	0.000205208	1	protein_coding
CFD	-1.08302	0.000212214	1	protein_coding
HELLS	-1.0712	0.000214418	1	protein_coding
PPP1R10	-1.19993	0.000214757	1	protein_coding
METRN	-1.1499	0.000217005	1	protein_coding
DEXI	-0.860393	0.000222215	1	protein_coding
CACYBP	-1.04975	0.000222955	1	protein_coding
EDF1	-0.900509	0.000223204	1	protein_coding
L3MBTL2	-1.00957	0.000223776	1	protein_coding
DPCD	-1.177	0.000224972	1	protein_coding
DYNLT1	-1.06574	0.000225276	1	protein_coding
SNRPD2	-1.0314	0.000226672	1	protein_coding
IRF3	-0.886501	0.000235795	1	protein_coding
AL138752.2	-1.06319	0.00023902	1	protein_coding
PTMAP5	-1.73068	0.000244925	1	transcribed_processed_pseudogene
CNDP2	-0.905882	0.000249542	1	protein_coding
HEXIM1	-1.10768	0.000254372	1	protein_coding
RABL6	-1.12651	0.000256376	1	protein_coding
ILF3-DT	-1.34436	0.000259192	1	lncRNA
ATAD3A	-1.0127	0.000261199	1	protein_coding
SF3B5	-1.10669	0.000261546	1	protein_coding
WFIKKN1	-1.62385	0.000264343	1	protein_coding
FASTKD5	-1.61762	0.000264808	1	protein_coding
BRICD5	-2.06924	0.000265939	1	protein_coding
TPI1	-0.90686	0.000267329	1	protein_coding
DYNLL2	-0.897551	0.000270043	1	protein_coding
ZNF326	-1.09864	0.000273257	1	protein_coding
GEMIN7	-0.837349	0.000274192	1	protein_coding
ZNF542P	-1.49935	0.000276182	1	transcribed_unprocessed_pseudogene
TRABD	-0.924746	0.000279404	1	protein_coding
ANAPC11	-0.950718	0.000280093	1	protein_coding
LDLRAP1	-1.08461	0.000281233	1	protein_coding
SPR	-0.886338	0.000281729	1	protein_coding
DCTPP1	-0.920171	0.000284883	1	protein_coding
MRPL27	-1.10229	0.000285713	1	protein_coding
AC022075.1	-1.64144	0.000287105	1	lncRNA
RPS27A	-1.09026	0.000288081	1	protein_coding
DCXR	-1.00201	0.000289013	1	protein_coding
DNAJC25-GNG10	-0.876604	0.000291135	1	protein_coding
COA6	-1.16001	0.000296017	1	protein_coding
ALG2	-0.81644	0.000297959	1	protein_coding
C1D	-0.970584	0.000298185	1	protein_coding
PCTP	-0.983392	0.000298315	1	protein_coding
IKBIP	-1.01099	0.000300786	1	protein_coding
LUC7L3	-1.71658	0.000306661	1	protein_coding
ANXA13	-1.38893	0.000313367	1	protein_coding
MICOS10-NBL1	-1.00789	0.000315007	1	protein_coding
ETV4	-1.41433	0.000319616	1	protein_coding
NDUFB7	-0.955	0.000319883	1	protein_coding
HBQ1	-1.45563	0.000324826	1	protein_coding
ATP5ME	-1.29489	0.000331051	1	protein_coding
PLEKHO1	-0.975121	0.00033317	1	protein_coding
CYBA	-0.984169	0.000333295	1	protein_coding
PRCC	-0.760337	0.000335401	1	protein_coding
CXCL1	-2.17226	0.000342148	1	protein_coding
SNORA57	-2.04837	0.000345666	1	snoRNA
AC006504.8	-1.82846	0.000353993	1	lncRNA
EED	-0.795641	0.00035486	1	protein_coding
AC023509.3	-2.85466	0.00035491	1	lncRNA
MFSD3	-0.954722	0.000359202	1	protein_coding
PSMD1	-1.17447	0.000362233	1	protein_coding
TXNP6	-1.70128	0.000363204	1	processed_pseudogene
AC005943.1	-1.14431	0.000363361	1	protein_coding
UFD1	-0.845299	0.00036587	1	protein_coding
EIF1AX	-0.770379	0.000370188	1	protein_coding
MRPS6	-0.982747	0.000370703	1	protein_coding
ZNF433-AS1	-1.43968	0.000375552	1	lncRNA
LSM7	-0.885673	0.000376806	1	protein_coding
KLHL23	-0.861231	0.000387329	1	protein_coding
KLHL23	-0.861231	0.000387329	1	protein_coding
ZMYND19	-0.838945	0.000387624	1	protein_coding
TMEM265	-1.88312	0.000393589	1	protein_coding
DYNLL1	-1.33057	0.000394559	1	protein_coding
LINC00526	-1.32213	0.00039464	1	lncRNA
AC011498.7	-2.52591	0.000396615	1	TEC
UQCR11	-1.11446	0.000396787	1	protein_coding
NOL12	-0.91994	0.0003983	1	protein_coding
TRAPPC4	-0.951893	0.000401489	1	protein_coding
AL360181.3	-0.873594	0.000401618	1	protein_coding
MSMO1	-1.57922	0.000404677	1	protein_coding
RPL7L1	-0.869665	0.000408406	1	protein_coding
MPV17L2	-1.09675	0.000415968	1	protein_coding
UTP3	-0.893312	0.00042011	1	protein_coding
SLC52A2	-1.01359	0.000420111	1	protein_coding
PSME2	-0.936179	0.000425254	1	protein_coding
MTG1	-0.862725	0.000425315	1	protein_coding
SUB1P3	-1.75719	0.000427607	1	processed_pseudogene
PTTG1	-1.01005	0.000433462	1	protein_coding
FDXR	-0.993232	0.000434415	1	protein_coding
TIGAR	-1.32354	0.000438055	1	protein_coding
ZNF771	-0.869334	0.000446405	1	protein_coding
AP001931.1	-1.28701	0.000448048	1	protein_coding
ADM5	-1.83831	0.000449801	1	protein_coding
TUBB6	-1.53393	0.000455168	1	protein_coding
DGKG	-1.86905	0.000455623	1	protein_coding
TBC1D7	-0.931343	0.000458103	1	protein_coding
TBC1D7	-0.931343	0.000458103	1	protein_coding
NANOS1	-1.6071	0.000458776	1	protein_coding
ASF1B	-1.21086	0.000465501	1	protein_coding
DEGS1	-1.12517	0.000466759	1	protein_coding
MICOS13	-1.05051	0.000470476	1	protein_coding
RECQL4	-1.07695	0.000477527	1	protein_coding
TMEM160	-1.26273	0.000478048	1	protein_coding
Z83844.1	-0.955564	0.000480661	1	protein_coding
EIF3B	-0.908549	0.000482884	1	protein_coding
DUT	-0.922266	0.000486563	1	protein_coding
ACTR5	-1.13422	0.000486673	1	protein_coding
PSMB3	-0.926578	0.000487721	1	protein_coding
AC074032.1	-0.875375	0.000490465	1	lncRNA
CHAF1A	-1.03552	0.000494099	1	protein_coding
SKP1	-0.918614	0.000494662	1	protein_coding
AC040162.1	-0.922431	0.000503363	1	protein_coding
VAMP8	-1.18025	0.000510874	1	protein_coding
AC010642.2	-1.19988	0.00051131	1	lncRNA
MRPL11	-0.926974	0.000512096	1	protein_coding
EMC6	-0.993539	0.000515255	1	protein_coding
ERVK3-1	-0.889033	0.000515746	1	protein_coding
NARF	-0.94503	0.000517853	1	protein_coding
ARMC7	-0.85471	0.000523237	1	protein_coding
CKAP4	-0.875688	0.000523477	1	protein_coding
ATP5MC3	-1.10218	0.000531897	1	protein_coding
PITX1	-0.999984	0.00053834	1	protein_coding
CHST7	-1.33417	0.000539041	1	protein_coding
AC036214.3	-0.936337	0.000541758	1	protein_coding
SRPK1	-0.938323	0.000544045	1	protein_coding
OPA3	-1.05274	0.000545601	1	protein_coding
MIR1307	-1.76486	0.000548063	1	miRNA
MRPL12	-1.07097	0.000550787	1	protein_coding
PSMD12	-1.03069	0.000553222	1	protein_coding
TRNP1	-0.926043	0.000555233	1	protein_coding
ALG14	-1.0554	0.000559399	1	protein_coding
MRPL41	-1.0535	0.00056467	1	protein_coding
SHH	-1.32591	0.000566863	1	protein_coding
SDHAF2	-0.732398	0.000567718	1	protein_coding
TXN	-1.1938	0.000571297	1	protein_coding
TM7SF2	-0.979121	0.00057714	1	protein_coding
SCO2	-0.938613	0.000582564	1	protein_coding
PIH1D1	-0.903369	0.000583859	1	protein_coding
AL928654.3	-1.09802	0.000584361	1	protein_coding
PDCD5	-0.952366	0.000597835	1	protein_coding
TRIP13	-1.00612	0.000599476	1	protein_coding
CALM1	-0.79291	0.000599873	1	protein_coding
C12orf43	-0.792757	0.000600566	1	protein_coding
C1orf35	-0.933666	0.00060557	1	protein_coding
CHORDC1	-0.782986	0.000614739	1	protein_coding
TXNL4A	-0.858819	0.00061518	1	protein_coding
CXCL6	-1.37403	0.000621417	1	protein_coding
CDC26	-0.849865	0.000624435	1	protein_coding
SRP9	-0.925421	0.000624912	1	protein_coding
MYH3	-2.2254	0.000629398	1	protein_coding
SMAD6	-1.13917	0.000633015	1	protein_coding
FKBP3	-0.941442	0.000636797	1	protein_coding
AF196969.1	-1.01875	0.000640722	1	protein_coding
JAML	-1.25816	0.000647126	1	protein_coding
ATP5MC1	-0.967823	0.000648517	1	protein_coding
BLCAP	-1.04364	0.000657193	1	protein_coding
BID	-0.992916	0.000661839	1	protein_coding
TPST2	-0.888756	0.00066186	1	protein_coding
DHRS13	-1.07284	0.000668654	1	protein_coding
COA3	-1.02183	0.000669344	1	protein_coding
ITPRIPL2	-1.27175	0.000669591	1	protein_coding
TRIR	-1.0115	0.000676595	1	protein_coding
POMP	-0.953067	0.000678083	1	protein_coding
MAPK8IP1	-1.01426	0.000684547	1	protein_coding
SDF2	-0.917198	0.000686469	1	protein_coding
FAM89B	-0.90692	0.000687971	1	protein_coding
MRPS34	-0.786968	0.000708297	1	protein_coding
REX1BD	-0.992852	0.000709613	1	protein_coding
CENPB	-1.14197	0.000711377	1	protein_coding
AC005837.1	-2.15789	0.000711901	1	lncRNA
ZNF780B	-1.4442	0.000729403	1	protein_coding
ST20	-1.18883	0.000735108	1	protein_coding
ZNF593	-0.8615	0.000739982	1	protein_coding
PTMAP4	-1.44991	0.00074118	1	processed_pseudogene
PRDX1	-0.955145	0.000743247	1	protein_coding
HMGB1P10	-2.08031	0.000745622	1	processed_pseudogene
MIR636	-1.38361	0.000747414	1	miRNA
LINC01909	-3.50612	0.000747908	1	lncRNA
TMSB10	-1.24145	0.000759522	1	protein_coding
GUK1	-0.933157	0.000760845	1	protein_coding
HSP90AA2P	-1.16557	0.000771297	1	processed_pseudogene
ISOC2	-0.901444	0.000778822	1	protein_coding
AC026403.1	-1.0457	0.000779987	1	processed_pseudogene
SAA4	-1.57835	0.000788507	1	protein_coding
ETNK1	-1.00452	0.000797811	1	protein_coding
MMAB	-1.5117	0.000809888	1	protein_coding
NDUFB11	-0.924399	0.000810048	1	protein_coding
DLGAP1-AS2	-1.87253	0.000817027	1	lncRNA
AMD1	-1.33869	0.00082171	1	protein_coding
TMEM250	-1.00979	0.000822291	1	protein_coding
MIS12	-0.975753	0.000823679	1	protein_coding
PSMB1	-0.833878	0.000828499	1	protein_coding
VCP	-0.925052	0.00082875	1	protein_coding
AP002360.1	-1.3854	0.000833998	1	lncRNA
AC125807.2	-1.62633	0.000842525	1	lncRNA
EVA1B	-0.951867	0.000844461	1	protein_coding
MOB3C	-1.36891	0.000845433	1	protein_coding
RPL21P75	-0.933435	0.000845887	1	processed_pseudogene
CUL3	-0.966922	0.000847278	1	protein_coding
AP2S1	-0.923153	0.000850788	1	protein_coding
ANAPC15	-0.914984	0.000852924	1	protein_coding
RELT	-1.32061	0.000853755	1	protein_coding
GSTO1	-0.953902	0.000854242	1	protein_coding
SSR2	-0.772034	0.000855351	1	protein_coding
TMEM74B	-1.08145	0.000871661	1	protein_coding
CYB561D1	-1.12603	0.000880841	1	protein_coding
MTFMT	-0.802064	0.000888302	1	protein_coding
AC069257.3	-0.96568	0.000892453	1	protein_coding
MRPL57	-0.951476	0.00089469	1	protein_coding
IER3IP1	-0.926089	0.000901075	1	protein_coding
AEN	-1.14997	0.000908117	1	protein_coding
AC012254.2	-0.743751	0.0009123	1	protein_coding
ITGAE	-0.863766	0.000913304	1	protein_coding
PSMB5	-0.869258	0.000914098	1	protein_coding
GSTM3	-0.954491	0.000915916	1	protein_coding
SLC25A4	-0.902452	0.000925327	1	protein_coding
ZNF69	-1.16646	0.000927481	1	protein_coding
GRWD1	-0.871235	0.000931083	1	protein_coding
SNORD4A	-2.19236	0.000936892	1	snoRNA
S100P	-0.952556	0.00094237	1	protein_coding
UQCRFS1	-0.895347	0.000948349	1	protein_coding
RBM14-RBM4	-0.938525	0.000950198	1	protein_coding
CCND1	-1.11783	0.000959083	1	protein_coding
RBM12	-0.758233	0.000964746	1	protein_coding
RIPPLY3	-3.11085	0.000965011	1	protein_coding
TMEM41A	-0.958554	0.000971038	1	protein_coding
KDM7A-DT	-1.22194	0.000972265	1	lncRNA
ZCCHC17	-0.954681	0.000975201	1	protein_coding
ZNF544	-0.901235	0.000975245	1	protein_coding
ZBTB8A	-1.60759	0.000977744	1	protein_coding
KISS1R	-1.08641	0.000982785	1	protein_coding
SNF8	-0.90925	0.0009853	1	protein_coding
LIME1	-1.25191	0.000990117	1	protein_coding
AC012146.1	-1.42148	0.000991882	1	lncRNA
NANS	-0.83138	0.000999584	1	protein_coding

## Sheet: SNU423_Downregulated < -1,5
Gene name	LogFC	pValue	FDR	Biotype
HMGB3	-1.96325	1.02942e-15	2.17814e-11	protein_coding
PCNA	-2.24918	1.61017e-15	3.40679e-11	protein_coding
SDF2L1	-2.03901	1.65569e-15	3.50294e-11	protein_coding
ETV5	-2.98545	1.36854e-14	2.89515e-10	protein_coding
FEN1	-2.49882	1.46344e-14	3.09577e-10	protein_coding
GATD3A	-4.68836	4.96895e-14	1.05103e-09	protein_coding
H2AFX	-2.17683	5.05827e-14	1.06988e-09	protein_coding
CRELD2	-1.75878	5.52571e-13	1.16863e-08	protein_coding
DUSP6	-4.64671	6.65967e-13	1.40839e-08	protein_coding
DKK1	-3.38703	2.38292e-12	5.03892e-08	protein_coding
AL139260.3	-1.76175	2.53815e-12	5.36691e-08	protein_coding
NDUFAF8	-1.75585	5.88167e-12	1.24362e-07	protein_coding
TLNRD1	-1.98631	6.12364e-12	1.29472e-07	protein_coding
CCR6	-3.82813	6.24825e-12	1.321e-07	protein_coding
CDC25A	-2.18076	3.09753e-11	6.54695e-07	protein_coding
AL365181.3	-1.99178	6.26399e-11	1.32383e-06	lncRNA
BRI3BP	-1.56596	7.78443e-11	1.64501e-06	protein_coding
PAQR4	-2.3046	7.94375e-11	1.67859e-06	protein_coding
SPRY4	-3.7902	9.31232e-11	1.9676e-06	protein_coding
E2F2	-2.38685	1.84605e-10	3.89977e-06	protein_coding
NR0B2	-2.95586	2.37558e-10	5.01818e-06	protein_coding
MANF	-1.98571	2.69356e-10	5.6896e-06	protein_coding
LINC01521	-3.0268	3.83882e-10	8.1076e-06	lncRNA
C11orf98	-1.59277	3.98089e-10	8.40723e-06	protein_coding
MYCBP	-1.65342	5.45376e-10	1.15162e-05	protein_coding
POLR2L	-1.68993	5.86095e-10	1.23754e-05	protein_coding
AC015813.2	-1.81241	6.41132e-10	1.35369e-05	protein_coding
LBHD1	-1.58216	7.11273e-10	1.50164e-05	protein_coding
MARCKSL1	-1.50756	8.78561e-10	1.85464e-05	protein_coding
ITPRIPL1	-3.43037	9.71429e-10	2.05059e-05	protein_coding
RBM38	-1.54301	1.09314e-09	2.3074e-05	protein_coding
PPP1R14B	-1.76037	1.63866e-09	3.45855e-05	protein_coding
CCNE1	-2.05289	2.06352e-09	4.35486e-05	protein_coding
CASC19	-2.74599	3.71166e-09	7.8316e-05	lncRNA
AP001505.1	-1.91079	4.61038e-09	9.72744e-05	lncRNA
SPRED1	-2.09997	5.64912e-09	0.00011918	protein_coding
HSPA1A	-2.14065	6.12285e-09	0.000129168	protein_coding
DNAJA1	-1.68562	6.25497e-09	0.000131949	protein_coding
SRSF1	-1.71345	1.28278e-08	0.000270487	protein_coding
MBD3	-1.60936	1.31281e-08	0.000276806	protein_coding
CENPW	-1.54342	1.39648e-08	0.000294434	protein_coding
AP1S3	-2.09685	1.45166e-08	0.000306054	protein_coding
SFN	-2.99091	1.53618e-08	0.000323857	protein_coding
MIR1244-3	-1.9354	1.72135e-08	0.000362825	miRNA
MSH6	-1.53524	2.33673e-08	0.000492349	protein_coding
CLDN2	-2.34662	2.56338e-08	0.000540052	protein_coding
UQCC3	-1.84601	2.68494e-08	0.000565608	protein_coding
TAF15	-1.62324	3.17963e-08	0.000669629	protein_coding
DLEU2	-1.80242	3.25163e-08	0.000684697	lncRNA
AL049840.4	-2.272	3.68551e-08	0.000775911	lncRNA
HNRNPM	-1.55197	4.19075e-08	0.000882194	protein_coding
GALNT4	-1.76074	4.85965e-08	0.00102271	protein_coding
AC130324.3	-3.81969	6.21227e-08	0.00130719	lncRNA
PRADC1	-1.58963	6.84667e-08	0.00144047	protein_coding
SAFB2	-1.51204	8.05566e-08	0.00169459	protein_coding
SFPQ	-1.62125	8.75694e-08	0.00184193	protein_coding
MIR1244-2	-1.75743	8.935e-08	0.0018793	miRNA
WNT3	-2.51724	1.17479e-07	0.00247057	protein_coding
WNT3	-2.51724	1.17479e-07	0.00247057	protein_coding
PYCR3	-2.1415	1.19178e-07	0.00250608	protein_coding
TIMM8A	-1.50916	1.23181e-07	0.00258987	protein_coding
CLSPN	-2.16393	1.53986e-07	0.00323695	protein_coding
HMGB1P6	-1.65402	1.75224e-07	0.00368251	processed_pseudogene
DGCR8	-1.65264	2.04266e-07	0.00429121	protein_coding
ID1	-1.93417	2.28207e-07	0.00479325	protein_coding
HNRNPH3	-1.5484	2.28252e-07	0.00479398	protein_coding
AC026464.2	-1.51071	2.77852e-07	0.00583266	lncRNA
RAB30-AS1	-2.00915	3.25757e-07	0.00683504	lncRNA
SRSF2	-1.56644	3.64791e-07	0.00765296	protein_coding
TEDC1	-1.54797	3.65073e-07	0.0076585	protein_coding
TMPO-AS1	-2.6447	3.9482e-07	0.00828096	lncRNA
MVD	-2.00798	3.96148e-07	0.00830841	protein_coding
MIR1244-1	-1.62493	4.25318e-07	0.00891892	miRNA
CYCS	-1.51103	4.89264e-07	0.0102569	protein_coding
CCDC85B	-1.65753	4.99165e-07	0.010464	protein_coding
CHRNA5	-2.20906	5.02718e-07	0.010538	protein_coding
H2AFZ	-1.52109	5.11201e-07	0.0107148	protein_coding
FAM111B	-2.33188	5.52172e-07	0.0115713	protein_coding
IDI1	-2.20832	6.47109e-07	0.0135537	protein_coding
ACAT2	-1.69106	6.6194e-07	0.0138637	protein_coding
GASAL1	-2.14588	7.78885e-07	0.016306	lncRNA
POC1B-GALNT4	-1.61369	9.02915e-07	0.018898	protein_coding
DHRS4L2	-1.59785	1.01456e-06	0.0212336	protein_coding
SPRY2	-1.51236	1.09438e-06	0.0228999	protein_coding
P2RY11	-2.37657	1.14542e-06	0.0239622	protein_coding
SERTAD1	-1.7762	1.21074e-06	0.0253202	protein_coding
ZBTB8OS	-1.63982	1.37677e-06	0.0287841	protein_coding
LRRC45	-1.6614	1.59184e-06	0.0332695	protein_coding
NSDHL	-1.5742	1.70004e-06	0.0355223	protein_coding
GJA1	-2.19568	1.75043e-06	0.0365699	protein_coding
HSPE1	-1.65692	1.77425e-06	0.0370658	protein_coding
AL450998.2	-1.98056	2.22993e-06	0.0465542	lncRNA
MIR671	-1.9596	2.23545e-06	0.0466649	miRNA
AL117332.1	-2.16236	2.38834e-06	0.0498422	lncRNA
OTUD6B-AS1	-1.63364	2.81787e-06	0.0587751	lncRNA
SWSAP1	-2.01793	2.86146e-06	0.0596816	protein_coding
TPM3P9	-1.8622	3.02601e-06	0.0631014	transcribed_processed_pseudogene
RNU6-8	-1.87096	3.44739e-06	0.0718677	snRNA
CCND3	-1.60884	4.80944e-06	0.100171	protein_coding
EPOP	-1.61887	4.95855e-06	0.103262	protein_coding
SOX4	-1.5363	4.98942e-06	0.1039	protein_coding
C15orf62	-3.54703	5.40998e-06	0.112593	protein_coding
ZNF587B	-1.56763	5.94238e-06	0.123637	protein_coding
INSIG1	-2.06861	6.55416e-06	0.136307	protein_coding
TMEM102	-2.08711	7.04561e-06	0.146499	protein_coding
MVK	-1.504	7.26315e-06	0.151008	protein_coding
MIR22HG	-2.34475	8.22392e-06	0.170877	lncRNA
TUBA4A	-1.87847	9.05491e-06	0.188016	protein_coding
HSPA5	-1.68969	1.0276e-05	0.213177	protein_coding
C4orf48	-1.56203	1.37523e-05	0.284811	protein_coding
AC012065.3	-1.91777	1.44213e-05	0.298594	lncRNA
ORAI2	-1.66438	1.61133e-05	0.333466	protein_coding
AC104113.1	-2.44322	1.65009e-05	0.341405	lncRNA
KLF2	-2.15049	1.67486e-05	0.346513	protein_coding
AC003002.2	-1.54969	1.97342e-05	0.407905	protein_coding
NAT8	-2.14198	2.06849e-05	0.427329	protein_coding
LYSMD4	-1.50705	2.10259e-05	0.434353	protein_coding
MAT2A	-1.66883	2.70257e-05	0.557675	protein_coding
LDLR	-1.59702	2.98031e-05	0.61448	protein_coding
AP005482.1	-2.04139	3.15049e-05	0.649316	lncRNA
ZBTB7A	-1.62133	3.22561e-05	0.66467	protein_coding
AC068631.3	-1.51065	3.95971e-05	0.814829	processed_pseudogene
EGR1	-4.02361	4.20948e-05	0.865596	protein_coding
CCNE2	-1.81577	4.62083e-05	0.94958	protein_coding
RN7SL731P	-1.87894	4.78484e-05	0.98314	misc_RNA
TYMP	-1.59819	5.17689e-05	1	protein_coding
RBBP6	-1.50716	5.78002e-05	1	protein_coding
UBAC2-AS1	-1.59807	6.04387e-05	1	lncRNA
MED31	-1.54184	7.93765e-05	1	protein_coding
CCDC71L	-3.34346	8.02708e-05	1	protein_coding
CYP26B1	-1.88203	8.70939e-05	1	protein_coding
SQLE	-1.73956	9.00803e-05	1	protein_coding
UHRF1	-1.59938	9.43748e-05	1	protein_coding
AL161772.1	-2.22792	0.000105003	1	lncRNA
AMIGO3	-1.9898	0.000107214	1	protein_coding
TCTEX1D2	-1.51225	0.000112598	1	protein_coding
TMEM52	-1.60637	0.000120727	1	protein_coding
HSP90AA1	-1.82889	0.000123005	1	protein_coding
AC016405.3	-2.59509	0.000123196	1	lncRNA
EMILIN1	-3.03089	0.000154646	1	protein_coding
ELMO3	-1.92801	0.000164027	1	protein_coding
HSPA1B	-1.57961	0.000186405	1	protein_coding
NES	-1.63466	0.000204315	1	protein_coding
PTMAP5	-1.73068	0.000244925	1	transcribed_processed_pseudogene
WFIKKN1	-1.62385	0.000264343	1	protein_coding
FASTKD5	-1.61762	0.000264808	1	protein_coding
BRICD5	-2.06924	0.000265939	1	protein_coding
AC022075.1	-1.64144	0.000287105	1	lncRNA
LUC7L3	-1.71658	0.000306661	1	protein_coding
CXCL1	-2.17226	0.000342148	1	protein_coding
SNORA57	-2.04837	0.000345666	1	snoRNA
AC006504.8	-1.82846	0.000353993	1	lncRNA
AC023509.3	-2.85466	0.00035491	1	lncRNA
TXNP6	-1.70128	0.000363204	1	processed_pseudogene
TMEM265	-1.88312	0.000393589	1	protein_coding
AC011498.7	-2.52591	0.000396615	1	TEC
MSMO1	-1.57922	0.000404677	1	protein_coding
SUB1P3	-1.75719	0.000427607	1	processed_pseudogene
ADM5	-1.83831	0.000449801	1	protein_coding
TUBB6	-1.53393	0.000455168	1	protein_coding
DGKG	-1.86905	0.000455623	1	protein_coding
NANOS1	-1.6071	0.000458776	1	protein_coding
MIR1307	-1.76486	0.000548063	1	miRNA
MYH3	-2.2254	0.000629398	1	protein_coding
AC005837.1	-2.15789	0.000711901	1	lncRNA
HMGB1P10	-2.08031	0.000745622	1	processed_pseudogene
LINC01909	-3.50612	0.000747908	1	lncRNA
SAA4	-1.57835	0.000788507	1	protein_coding
MMAB	-1.5117	0.000809888	1	protein_coding
DLGAP1-AS2	-1.87253	0.000817027	1	lncRNA
AC125807.2	-1.62633	0.000842525	1	lncRNA
SNORD4A	-2.19236	0.000936892	1	snoRNA
RIPPLY3	-3.11085	0.000965011	1	protein_coding
ZBTB8A	-1.60759	0.000977744	1	protein_coding
