# Supplementary material for: Broad Transcriptomic Impact of Sorafenib and Its Relation to the Antitumoral Properties in Liver Cancer Cells
Source: Cancers (Basel). 2022 Feb 25;14(5):1204. doi: 10.3390/cancers14051204 (PMC8909169; doi:10.3390/cancers14051204)
Supplement: Supplementary file 1 [file cancers-14-01204-s001.zip › Table S3.xlsx]

## Sheet: Negative enrichment
NAME	SIZE	ES	NES	NOM p-val	FDR q-val	FWER p-val
REACTOME_DNA_REPLICATION	124	0.692707	2.3124	0	0	0
REACTOME_DNA_STRAND_ELONGATION	32	0.820552	2.22732	0	0	0
REACTOME_RESPIRATORY_ELECTRON_TRANSPORT_ATP_SYNTHESIS_BY_CHEMIOSMOTIC_COUPLING_AND_HEAT_PRODUCTION_BY_UNCOUPLING_PROTEINS	121	0.651426	2.17482	0	0	0
REACTOME_CHOLESTEROL_BIOSYNTHESIS	25	0.857763	2.17242	0	0	0
REACTOME_DNA_REPLICATION_PRE_INITIATION	83	0.663374	2.12873	0	0	0
REACTOME_RESPIRATORY_ELECTRON_TRANSPORT	100	0.646826	2.11823	0	0	0
REACTOME_MITOCHONDRIAL_TRANSLATION	96	0.642205	2.08421	0	0	0
REACTOME_THE_ROLE_OF_GTSE1_IN_G2_M_PROGRESSION_AFTER_G2_CHECKPOINT	74	0.66176	2.08199	0	0	0
REACTOME_TRANSLATION	274	0.557565	2.07222	0	0	0
REACTOME_AUF1_HNRNP_D0_BINDS_AND_DESTABILIZES_MRNA	54	0.706391	2.06735	0	0	0
REACTOME_MRNA_SPLICING_MINOR_PATHWAY	52	0.71138	2.06348	0	0	0
REACTOME_REGULATION_OF_EXPRESSION_OF_SLITS_AND_ROBOS	167	0.57675	2.03159	0	0.000316135	0.004
REACTOME_SRP_DEPENDENT_COTRANSLATIONAL_PROTEIN_TARGETING_TO_MEMBRANE	110	0.613073	2.01711	0	0.000291817	0.004
REACTOME_ASSEMBLY_OF_THE_PRE_REPLICATIVE_COMPLEX	67	0.665498	2.01022	0	0.000270973	0.004
REACTOME_THE_CITRIC_ACID_TCA_CYCLE_AND_RESPIRATORY_ELECTRON_TRANSPORT	167	0.573164	2.01014	0	0.000252908	0.004
REACTOME_SWITCHING_OF_ORIGINS_TO_A_POST_REPLICATIVE_STATE	88	0.622881	2.00698	0	0.000237101	0.004
REACTOME_NEGATIVE_REGULATION_OF_NOTCH4_SIGNALING	54	0.668146	1.97879	0	0.000555913	0.01
REACTOME_HSF1_ACTIVATION	26	0.764942	1.96873	0	0.0005766	0.011
REACTOME_S_PHASE	158	0.569072	1.95852	0	0.000747673	0.015
REACTOME_ORC1_REMOVAL_FROM_CHROMATIN	69	0.641598	1.95692	0	0.000806818	0.017
REACTOME_SCF_SKP2_MEDIATED_DEGRADATION_OF_P27_P21	58	0.648021	1.95244	0	0.000768398	0.017
REACTOME_GAP_JUNCTION_ASSEMBLY	24	0.78481	1.94353	0	0.000908777	0.021
REACTOME_MITOCHONDRIAL_PROTEIN_IMPORT	64	0.621361	1.93328	0	0.00107753	0.026
REACTOME_COMPLEX_I_BIOGENESIS	55	0.654533	1.92379	0	0.00130865	0.033
REACTOME_FORMATION_OF_TUBULIN_FOLDING_INTERMEDIATES_BY_CCT_TRIC	24	0.755132	1.92231	0	0.00125631	0.033
REACTOME_AGGREPHAGY	39	0.698549	1.91726	0	0.00131947	0.036
REACTOME_UNWINDING_OF_DNA	12	0.879496	1.91563	0	0.00137598	0.039
REACTOME_EUKARYOTIC_TRANSLATION_ELONGATION	91	0.58993	1.90343	0	0.00160252	0.047
REACTOME_CHROMOSOME_MAINTENANCE	70	0.612005	1.89605	0	0.00184172	0.055
REACTOME_DEFECTIVE_CFTR_CAUSES_CYSTIC_FIBROSIS	59	0.623624	1.89281	0	0.00190582	0.059
REACTOME_EXTENSION_OF_TELOMERES	43	0.659791	1.891	0	0.00187512	0.06
REACTOME_EUKARYOTIC_TRANSLATION_INITIATION	117	0.555576	1.88502	0	0.00217548	0.07
REACTOME_MRNA_SPLICING	186	0.532651	1.88274	0	0.00222633	0.074
REACTOME_CROSS_PRESENTATION_OF_SOLUBLE_EXOGENOUS_ANTIGENS_ENDOSOMES	45	0.661578	1.87615	0	0.00258175	0.089
REACTOME_LAGGING_STRAND_SYNTHESIS	20	0.783048	1.87297	0	0.00272287	0.095
REACTOME_RESOLUTION_OF_ABASIC_SITES_AP_SITES	38	0.678697	1.87219	0	0.00275299	0.098
REACTOME_APC_C_CDH1_MEDIATED_DEGRADATION_OF_CDC20_AND_OTHER_APC_C_CDH1_TARGETED_PROTEINS_IN_LATE_MITOSIS_EARLY_G1	71	0.60106	1.86413	0	0.00330308	0.121
REACTOME_DEGRADATION_OF_GLI1_BY_THE_PROTEASOME	58	0.624243	1.86315	0	0.00324112	0.122
REACTOME_METABOLISM_OF_POLYAMINES	58	0.624234	1.86158	0.00238095	0.00325597	0.125
REACTOME_TELOMERE_MAINTENANCE	43	0.659791	1.8596	0	0.00329222	0.129
REACTOME_FGFR2_MUTANT_RECEPTOR_ACTIVATION	24	0.755831	1.85915	0	0.00323558	0.129
REACTOME_PCNA_DEPENDENT_LONG_PATCH_BASE_EXCISION_REPAIR	21	0.767892	1.85276	0.0021692	0.00352322	0.143
REACTOME_SIGNALING_BY_FGFR2_IIIA_TM	19	0.776652	1.85091	0	0.00357489	0.148
REACTOME_RRNA_PROCESSING	201	0.518587	1.84668	0	0.00366695	0.155
REACTOME_G2_M_CHECKPOINTS	133	0.541283	1.84562	0	0.00365087	0.157
REACTOME_POST_CHAPERONIN_TUBULIN_FOLDING_PATHWAY	21	0.752443	1.84558	0.0022779	0.00357151	0.157
REACTOME_HSP90_CHAPERONE_CYCLE_FOR_STEROID_HORMONE_RECEPTORS_SHR	52	0.62626	1.84154	0	0.00373954	0.168
REACTOME_REGULATION_OF_MRNA_STABILITY_BY_PROTEINS_THAT_BIND_AU_RICH_ELEMENTS	86	0.577656	1.83936	0	0.00379847	0.174
REACTOME_TRANSPORT_OF_CONNEXONS_TO_THE_PLASMA_MEMBRANE	16	0.794027	1.83116	0	0.00416441	0.193
REACTOME_ANTIGEN_PROCESSING_CROSS_PRESENTATION	91	0.56337	1.82852	0	0.00446077	0.211
REACTOME_G1_S_SPECIFIC_TRANSCRIPTION	28	0.700141	1.82705	0.00195695	0.00459838	0.223
REACTOME_FGFR2_ALTERNATIVE_SPLICING	27	0.711196	1.8247	0	0.00469535	0.229
REACTOME_RESOLUTION_OF_AP_SITES_VIA_THE_MULTIPLE_NUCLEOTIDE_PATCH_REPLACEMENT_PATHWAY	25	0.740101	1.82438	0	0.00460676	0.229
REACTOME_RECOGNITION_OF_DNA_DAMAGE_BY_PCNA_CONTAINING_REPLICATION_COMPLEX	30	0.681965	1.82343	0	0.00459205	0.232
REACTOME_CRISTAE_FORMATION	31	0.679844	1.82098	0.00643777	0.00478328	0.242
REACTOME_MITOTIC_G1_PHASE_AND_G1_S_TRANSITION	146	0.532436	1.8188	0	0.00483728	0.245
REACTOME_PROTEIN_METHYLATION	17	0.777964	1.80445	0	0.0062125	0.31
REACTOME_TELOMERE_C_STRAND_LAGGING_STRAND_SYNTHESIS	27	0.705848	1.80112	0.004329	0.0063539	0.32
REACTOME_PROCESSING_OF_CAPPED_INTRON_CONTAINING_PRE_MRNA	236	0.493138	1.79033	0	0.00752335	0.371
REACTOME_ATTENUATION_PHASE	23	0.710292	1.77966	0.00414079	0.00895262	0.428
REACTOME_PROCESSIVE_SYNTHESIS_ON_THE_LAGGING_STRAND	15	0.803148	1.77748	0	0.00919687	0.442
REACTOME_GAP_FILLING_DNA_REPAIR_SYNTHESIS_AND_LIGATION_IN_GG_NER	25	0.682436	1.77737	0.00217865	0.00907905	0.442
REACTOME_PROCESSIVE_SYNTHESIS_ON_THE_C_STRAND_OF_THE_TELOMERE	13	0.816859	1.77184	0	0.00967229	0.467
REACTOME_HEDGEHOG_LIGAND_BIOGENESIS	63	0.587011	1.76888	0	0.00986193	0.481
REACTOME_ABC_TRANSPORTER_DISORDERS	75	0.558608	1.76703	0	0.0100209	0.494
REACTOME_TRANSLESION_SYNTHESIS_BY_POLH	19	0.748041	1.7652	0.00214592	0.0102159	0.506
REACTOME_BASE_EXCISION_REPAIR	45	0.624226	1.7651	0	0.0100773	0.506
REACTOME_COOPERATION_OF_PREFOLDIN_AND_TRIC_CCT_IN_ACTIN_AND_TUBULIN_FOLDING	31	0.671447	1.76489	0.00217391	0.00995685	0.508
REACTOME_SNRNP_ASSEMBLY	53	0.589313	1.76379	0	0.0100072	0.517
REACTOME_INFLUENZA_INFECTION	151	0.505447	1.75213	0	0.0116924	0.587
REACTOME_APC_C_MEDIATED_DEGRADATION_OF_CELL_CYCLE_PROTEINS	84	0.551773	1.74392	0	0.0133471	0.643
REACTOME_FANCONI_ANEMIA_PATHWAY	38	0.627332	1.74208	0	0.0136233	0.65
REACTOME_G1_S_DNA_DAMAGE_CHECKPOINTS	66	0.568358	1.74048	0	0.0137345	0.656
REACTOME_REMOVAL_OF_THE_FLAP_INTERMEDIATE_FROM_THE_C_STRAND	11	0.826832	1.73841	0.0040404	0.014005	0.672
REACTOME_REGULATION_OF_RAS_BY_GAPS	65	0.57837	1.73403	0	0.0148782	0.691
REACTOME_ACTIVATION_OF_THE_PRE_REPLICATIVE_COMPLEX	32	0.658944	1.73078	0.00649351	0.0155	0.711
REACTOME_HEDGEHOG_OFF_STATE	106	0.517909	1.7264	0	0.0165472	0.743
REACTOME_ACTIVATION_OF_ATR_IN_RESPONSE_TO_REPLICATION_STRESS	37	0.619488	1.72542	0	0.0166403	0.747
REACTOME_DUAL_INCISION_IN_TC_NER	65	0.562816	1.71793	0.00226244	0.0181036	0.779
REACTOME_INTRAFLAGELLAR_TRANSPORT	51	0.584558	1.71657	0.00675676	0.0182615	0.787
REACTOME_STABILIZATION_OF_P53	56	0.573346	1.71168	0	0.0193237	0.811
REACTOME_TETRAHYDROBIOPTERIN_BH4_SYNTHESIS_RECYCLING_SALVAGE_AND_REGULATION	10	0.842217	1.70855	0.00403226	0.0200523	0.825
REACTOME_HSF1_DEPENDENT_TRANSACTIVATION	32	0.646504	1.70251	0.00229885	0.0218813	0.853
REACTOME_SEALING_OF_THE_NUCLEAR_ENVELOPE_NE_BY_ESCRT_III	28	0.647553	1.69978	0.00672646	0.0223647	0.859
REACTOME_DUAL_INCISION_IN_GG_NER	41	0.61531	1.69026	0.00211416	0.0253501	0.888
REACTOME_CELL_CYCLE_CHECKPOINTS	254	0.459972	1.68414	0	0.0276191	0.909
REACTOME_POLYMERASE_SWITCHING_ON_THE_C_STRAND_OF_THE_TELOMERE	16	0.736768	1.68217	0.00647948	0.0281888	0.913
REACTOME_SEPARATION_OF_SISTER_CHROMATIDS	184	0.473616	1.67983	0	0.02879	0.919
REACTOME_FORMATION_OF_ATP_BY_CHEMIOSMOTIC_COUPLING	18	0.723859	1.67933	0.00440529	0.0285846	0.921
REACTOME_DEGRADATION_OF_DVL	55	0.562373	1.67056	0.00681818	0.0320584	0.944
REACTOME_CHAPERONE_MEDIATED_AUTOPHAGY	20	0.690296	1.65676	0.00596422	0.0378483	0.971
REACTOME_ACTIVATION_OF_THE_MRNA_UPON_BINDING_OF_THE_CAP_BINDING_COMPLEX_AND_EIFS_AND_SUBSEQUENT_BINDING_TO_43S	59	0.555879	1.65609	0	0.0377248	0.971
REACTOME_TRANSCRIPTION_COUPLED_NUCLEOTIDE_EXCISION_REPAIR_TC_NER	78	0.526961	1.65228	0	0.0391222	0.972
REACTOME_ENOS_ACTIVATION	11	0.804892	1.65042	0.00617284	0.0396369	0.972
REACTOME_DEFENSINS	8	0.867147	1.63621	0	0.0468101	0.984
REACTOME_REGULATION_OF_RUNX3_EXPRESSION_AND_ACTIVITY	54	0.551158	1.63515	0	0.0472099	0.987
REACTOME_RRNA_MODIFICATION_IN_THE_NUCLEUS_AND_CYTOSOL	60	0.532012	1.62663	0.0022779	0.052355	0.992
REACTOME_PROCESSING_OF_CAPPED_INTRONLESS_PRE_MRNA	28	0.613803	1.62346	0.00849257	0.0540322	0.994
REACTOME_CYCLIN_A_CDK2_ASSOCIATED_EVENTS_AT_S_PHASE_ENTRY	83	0.507662	1.62025	0.00471698	0.0556688	0.997
REACTOME_ACTIVATION_OF_GENE_EXPRESSION_BY_SREBF_SREBP	42	0.567416	1.61738	0.00636943	0.0571944	0.998
REACTOME_ABORTIVE_ELONGATION_OF_HIV_1_TRANSCRIPT_IN_THE_ABSENCE_OF_TAT	23	0.636856	1.6146	0.0145228	0.0582898	0.998
REACTOME_HOST_INTERACTIONS_OF_HIV_FACTORS	126	0.47443	1.61165	0.002331	0.0597573	0.998
REACTOME_NUCLEOTIDE_LIKE_PURINERGIC_RECEPTORS	11	0.773355	1.60957	0.00631579	0.0605345	0.998
REACTOME_RNA_POLYMERASE_II_TRANSCRIPTION_TERMINATION	65	0.53219	1.60916	0.00227273	0.0602181	0.998
REACTOME_INTERCONVERSION_OF_NUCLEOTIDE_DI_AND_TRIPHOSPHATES	28	0.620281	1.60765	0.012959	0.0607319	0.999
REACTOME_METABOLISM_OF_NUCLEOTIDES	93	0.493291	1.60671	0	0.0606872	0.999
REACTOME_NONSENSE_MEDIATED_DECAY_NMD	113	0.485414	1.60127	0.00229358	0.0641891	1
REACTOME_MICRORNA_MIRNA_BIOGENESIS	24	0.643145	1.5933	0.0184332	0.0696946	1
REACTOME_TRANSLESION_SYNTHESIS_BY_POLK	17	0.673601	1.59218	0.0221774	0.0698605	1
REACTOME_SIGNALING_BY_ROBO_RECEPTORS	211	0.444741	1.5882	0	0.0721385	1
REACTOME_RNA_POLYMERASE_III_CHAIN_ELONGATION	18	0.682995	1.58795	0.0202247	0.0717119	1
REACTOME_SELECTIVE_AUTOPHAGY	75	0.501653	1.58758	0.0021645	0.0714534	1
REACTOME_POLYMERASE_SWITCHING	14	0.715991	1.58368	0.0204499	0.0741889	1
REACTOME_REGULATION_OF_HSF1_MEDIATED_HEAT_SHOCK_RESPONSE	75	0.507688	1.58312	0.00224719	0.0739966	1
REACTOME_HDR_THROUGH_HOMOLOGOUS_RECOMBINATION_HRR	66	0.51362	1.58275	0.0090703	0.0735922	1
REACTOME_HOMOLOGY_DIRECTED_REPAIR	102	0.481135	1.581	0	0.0744378	1
REACTOME_BETA_DEFENSINS	5	0.918811	1.57881	0.00198413	0.0755964	1
REACTOME_P2Y_RECEPTORS	7	0.834235	1.57876	0.0182186	0.0749799	1
REACTOME_DEPOSITION_OF_NEW_CENPA_CONTAINING_NUCLEOSOMES_AT_THE_CENTROMERE	28	0.602776	1.57424	0.0130719	0.0780857	1
REACTOME_AMINE_LIGAND_BINDING_RECEPTORS	17	0.682728	1.56683	0.0125786	0.0834921	1
REACTOME_CELLULAR_RESPONSE_TO_HEAT_STRESS	93	0.481618	1.56386	0	0.0855442	1
REACTOME_REGULATION_OF_INNATE_IMMUNE_RESPONSES_TO_CYTOSOLIC_DNA	12	0.736023	1.56302	0.0292276	0.0855897	1
REACTOME_CHYLOMICRON_CLEARANCE	5	0.918534	1.56113	0	0.0866154	1
REACTOME_ABC_FAMILY_PROTEINS_MEDIATED_TRANSPORT	100	0.478452	1.56024	0	0.0867026	1
REACTOME_FCERI_MEDIATED_NF_KB_ACTIVATION	81	0.489694	1.55867	0	0.0873317	1
REACTOME_PROTEIN_LOCALIZATION	161	0.449698	1.55298	0	0.091959	1
REACTOME_METABOLISM_OF_STEROIDS	133	0.455449	1.54813	0.00238095	0.0957814	1
REACTOME_TERMINATION_OF_TRANSLESION_DNA_SYNTHESIS	32	0.575443	1.53936	0.0181818	0.103996	1
REACTOME_MITOTIC_METAPHASE_AND_ANAPHASE	229	0.431815	1.53532	0	0.107396	1
REACTOME_SELENOAMINO_ACID_METABOLISM	105	0.461308	1.53464	0.0122249	0.107199	1
REACTOME_ASYMMETRIC_LOCALIZATION_OF_PCP_PROTEINS	62	0.501035	1.53152	0.00865801	0.10963	1
REACTOME_CELL_CYCLE_MITOTIC	489	0.396469	1.53102	0	0.10934	1
REACTOME_DOWNSTREAM_SIGNALING_EVENTS_OF_B_CELL_RECEPTOR_BCR	80	0.485002	1.52693	0.00234192	0.112964	1
REACTOME_TRANSLESION_SYNTHESIS_BY_Y_FAMILY_DNA_POLYMERASES_BYPASSES_LESIONS_ON_DNA_TEMPLATE	39	0.538077	1.52638	0.0266075	0.112663	1
REACTOME_G0_AND_EARLY_G1	26	0.590524	1.52609	0.0294695	0.112125	1
REACTOME_PIWI_INTERACTING_RNA_PIRNA_BIOGENESIS	23	0.624586	1.52344	0.0191489	0.114303	1
REACTOME_REGULATION_OF_CHOLESTEROL_BIOSYNTHESIS_BY_SREBP_SREBF	55	0.508949	1.52196	0.00852879	0.115018	1
REACTOME_TRNA_PROCESSING	108	0.467451	1.51544	0.00221239	0.121111	1
REACTOME_MRNA_DECAY_BY_3_TO_5_EXORIBONUCLEASE	16	0.657808	1.51435	0.031185	0.121359	1
REACTOME_RNA_POLYMERASE_III_TRANSCRIPTION_TERMINATION	23	0.61564	1.51273	0.0290456	0.122154	1
REACTOME_SCAVENGING_BY_CLASS_F_RECEPTORS	6	0.838287	1.50645	0.0348584	0.128388	1
REACTOME_HEDGEHOG_ON_STATE	81	0.468366	1.5057	0.00968523	0.12833	1
REACTOME_TRIGLYCERIDE_CATABOLISM	17	0.637749	1.50389	0.0377734	0.129392	1
REACTOME_DECTIN_1_MEDIATED_NONCANONICAL_NF_KB_SIGNALING	59	0.494768	1.49924	0.0277778	0.134205	1
REACTOME_NUCLEOTIDE_EXCISION_REPAIR	110	0.453855	1.49882	0.00453515	0.133831	1
REACTOME_APC_C_CDC20_MEDIATED_DEGRADATION_OF_CYCLIN_B	23	0.606057	1.49395	0.0283976	0.138979	1
REACTOME_CARBOXYTERMINAL_POST_TRANSLATIONAL_MODIFICATIONS_OF_TUBULIN	35	0.544675	1.49336	0.03125	0.138759	1
REACTOME_APC_CDC20_MEDIATED_DEGRADATION_OF_NEK2A	25	0.590437	1.49288	0.0430328	0.138427	1
REACTOME_BIOSYNTHESIS_OF_THE_N_GLYCAN_PRECURSOR_DOLICHOL_LIPID_LINKED_OLIGOSACCHARIDE_LLO_AND_TRANSFER_TO_A_NASCENT_PROTEIN	73	0.482747	1.49249	0.0136364	0.138011	1
REACTOME_ACTIVATION_OF_AMPK_DOWNSTREAM_OF_NMDARS	25	0.597742	1.4921	0.038	0.137447	1
REACTOME_DETOXIFICATION_OF_REACTIVE_OXYGEN_SPECIES	32	0.549738	1.49198	0.0288248	0.136727	1
REACTOME_SIGNALING_BY_HEDGEHOG	140	0.433816	1.48773	0.00246305	0.141083	1
REACTOME_SLBP_DEPENDENT_PROCESSING_OF_REPLICATION_DEPENDENT_HISTONE_PRE_MRNAS	11	0.708103	1.48709	0.044586	0.141	1
REACTOME_RA_BIOSYNTHESIS_PATHWAY	18	0.621577	1.47911	0.0366379	0.149915	1
REACTOME_METABOLISM_OF_COFACTORS	19	0.603601	1.46871	0.0348361	0.162683	1
REACTOME_TRANSCRIPTION_OF_E2F_TARGETS_UNDER_NEGATIVE_CONTROL_BY_DREAM_COMPLEX	19	0.620522	1.46539	0.045738	0.165997	1
REACTOME_METABOLISM_OF_AMINO_ACIDS_AND_DERIVATIVES	338	0.38798	1.464	0	0.166836	1
REACTOME_DNA_DAMAGE_BYPASS	48	0.505629	1.45895	0.02407	0.173151	1
REACTOME_GENE_AND_PROTEIN_EXPRESSION_BY_JAK_STAT_SIGNALING_AFTER_INTERLEUKIN_12_STIMULATION	35	0.544965	1.45818	0.0430108	0.173148	1
REACTOME_MISMATCH_REPAIR	15	0.655129	1.45734	0.0604752	0.173282	1
REACTOME_TRNA_MODIFICATION_IN_THE_MITOCHONDRION	8	0.75573	1.45487	0.0635246	0.175446	1
REACTOME_MODULATION_BY_MTB_OF_HOST_IMMUNE_SYSTEM	7	0.788148	1.45265	0.0492813	0.177371	1
REACTOME_PROTEIN_UBIQUITINATION	64	0.482278	1.44609	0.0198676	0.186275	1
REACTOME_EARLY_PHASE_OF_HIV_LIFE_CYCLE	13	0.665363	1.44075	0.0625	0.193419	1
REACTOME_E3_UBIQUITIN_LIGASES_UBIQUITINATE_TARGET_PROTEINS	44	0.513135	1.43907	0.0299786	0.194673	1
REACTOME_MRNA_CAPPING	29	0.549854	1.43565	0.0530452	0.198568	1
REACTOME_CYTOSOLIC_SENSORS_OF_PATHOGEN_ASSOCIATED_DNA	58	0.480311	1.43447	0.0243902	0.199233	1
REACTOME_HIGHLY_CALCIUM_PERMEABLE_POSTSYNAPTIC_NICOTINIC_ACETYLCHOLINE_RECEPTORS	5	0.837706	1.43382	0.0496032	0.19909	1
REACTOME_GLYCOGEN_METABOLISM	25	0.566285	1.43323	0.0492126	0.198784	1
REACTOME_N_GLYCAN_TRIMMING_AND_ELONGATION_IN_THE_CIS_GOLGI	5	0.823216	1.4298	0.0649087	0.202784	1
REACTOME_CS_DS_DEGRADATION	12	0.664333	1.4243	0.0785124	0.209996	1
REACTOME_SYNTHESIS_OF_GLYCOSYLPHOSPHATIDYLINOSITOL_GPI	18	0.609609	1.42377	0.0561331	0.209623	1
REACTOME_INWARDLY_RECTIFYING_K_CHANNELS	28	0.544879	1.42288	0.0450644	0.209936	1
REACTOME_JOSEPHIN_DOMAIN_DUBS	11	0.661049	1.42188	0.0847458	0.210404	1
REACTOME_HIV_INFECTION	223	0.393464	1.41869	0.00253165	0.213999	1
REACTOME_2_LTR_CIRCLE_FORMATION	7	0.732827	1.41109	0.0748988	0.224973	1
REACTOME_DNA_DOUBLE_STRAND_BREAK_REPAIR	129	0.415948	1.40979	0.0118203	0.225798	1
REACTOME_ASSEMBLY_AND_CELL_SURFACE_PRESENTATION_OF_NMDA_RECEPTORS	36	0.516526	1.40926	0.0452586	0.225362	1
REACTOME_KSRP_KHSRP_BINDS_AND_DESTABILIZES_MRNA	17	0.604828	1.40812	0.0824524	0.226035	1
REACTOME_RNA_POLYMERASE_III_TRANSCRIPTION_INITIATION_FROM_TYPE_1_PROMOTER	28	0.543219	1.40772	0.0672098	0.22547	1
REACTOME_TELOMERE_EXTENSION_BY_TELOMERASE	16	0.618089	1.40676	0.0703125	0.225753	1
REACTOME_VITAMINS	5	0.81498	1.40463	0.067623	0.228113	1
REACTOME_SYNTHESIS_OF_ACTIVE_UBIQUITIN_ROLES_OF_E1_AND_E2_ENZYMES	30	0.52993	1.40288	0.0723684	0.229782	1
REACTOME_HYALURONAN_UPTAKE_AND_DEGRADATION	11	0.66666	1.40139	0.0855397	0.230973	1
REACTOME_LYSOSOME_VESICLE_BIOGENESIS	35	0.508136	1.40045	0.0421286	0.231238	1
REACTOME_CELLULAR_RESPONSE_TO_HYPOXIA	73	0.454236	1.39585	0.045045	0.237616	1
REACTOME_MYOCLONIC_EPILEPSY_OF_LAFORA	8	0.727215	1.39233	0.0763052	0.242068	1
REACTOME_EICOSANOID_LIGAND_BINDING_RECEPTORS	7	0.747434	1.39088	0.0988372	0.243374	1
REACTOME_POLB_DEPENDENT_LONG_PATCH_BASE_EXCISION_REPAIR	8	0.732164	1.39073	0.0894309	0.242349	1
REACTOME_TRAF6_MEDIATED_IRF7_ACTIVATION_IN_TLR7_8_OR_9_SIGNALING	11	0.678331	1.38993	0.109053	0.242496	1
REACTOME_EXPORT_OF_VIRAL_RIBONUCLEOPROTEINS_FROM_NUCLEUS	32	0.505694	1.38434	0.0701754	0.250629	1
REACTOME_HYALURONAN_METABOLISM	13	0.624563	1.38211	0.0961145	0.253195	1
REACTOME_MEIOTIC_RECOMBINATION	24	0.554938	1.38134	0.0865801	0.25316	1
REACTOME_SYNTHESIS_OF_SUBSTRATES_IN_N_GLYCAN_BIOSYTHESIS	58	0.457404	1.38052	0.0413793	0.253468	1
REACTOME_VIRAL_MESSENGER_RNA_SYNTHESIS	43	0.486044	1.37988	0.0599572	0.25332	1
REACTOME_TICAM1_DEPENDENT_ACTIVATION_OF_IRF3_IRF7	11	0.665796	1.37537	0.120792	0.260114	1
REACTOME_REGULATION_OF_RUNX2_EXPRESSION_AND_ACTIVITY	68	0.448318	1.37355	0.0426439	0.262203	1
REACTOME_HDR_THROUGH_MMEJ_ALT_NHEJ	10	0.653339	1.37311	0.129363	0.261673	1
REACTOME_SIGNALING_BY_NOTCH4	79	0.434078	1.37311	0.0393519	0.260372	1
REACTOME_CHL1_INTERACTIONS	9	0.668508	1.37151	0.143969	0.261838	1
REACTOME_ACTIVATION_OF_IRF3_IRF7_MEDIATED_BY_TBK1_IKK_EPSILON	16	0.585259	1.37136	0.0890869	0.260755	1
REACTOME_TRNA_PROCESSING_IN_THE_NUCLEUS	58	0.459392	1.37058	0.058427	0.260949	1
REACTOME_DNA_REPAIR	282	0.369934	1.36727	0.00258398	0.265143	1
REACTOME_GLOBAL_GENOME_NUCLEOTIDE_EXCISION_REPAIR_GG_NER	84	0.438041	1.36688	0.0366133	0.264535	1
REACTOME_RUNX1_REGULATES_TRANSCRIPTION_OF_GENES_INVOLVED_IN_DIFFERENTIATION_OF_HSCS	64	0.447751	1.36588	0.0545455	0.264905	1
REACTOME_TRNA_MODIFICATION_IN_THE_NUCLEUS_AND_CYTOSOL	42	0.485128	1.36274	0.0567686	0.269189	1
REACTOME_MAPK6_MAPK4_SIGNALING	87	0.425745	1.35991	0.0235294	0.272978	1
REACTOME_FORMATION_OF_TC_NER_PRE_INCISION_COMPLEX	53	0.471623	1.35604	0.045977	0.278464	1
REACTOME_PROCESSING_OF_INTRONLESS_PRE_MRNAS	19	0.565423	1.35485	0.136929	0.279281	1
REACTOME_CLASS_A_1_RHODOPSIN_LIKE_RECEPTORS	150	0.394916	1.35295	0.0194175	0.281413	1
REACTOME_GAP_JUNCTION_TRAFFICKING_AND_REGULATION	37	0.484068	1.3515	0.0779816	0.282647	1
REACTOME_FGFRL1_MODULATION_OF_FGFR1_SIGNALING	7	0.726158	1.34941	0.130165	0.2851	1
REACTOME_DEGRADATION_OF_BETA_CATENIN_BY_THE_DESTRUCTION_COMPLEX	83	0.422822	1.34607	0.040724	0.28955	1
REACTOME_PROTEIN_FOLDING	92	0.418762	1.34289	0.0365297	0.293855	1
REACTOME_REGULATION_OF_PTEN_STABILITY_AND_ACTIVITY	68	0.436198	1.33804	0.0337079	0.301277	1
REACTOME_CHONDROITIN_SULFATE_DERMATAN_SULFATE_METABOLISM	47	0.464571	1.33313	0.0734967	0.309083	1
REACTOME_SUPPRESSION_OF_APOPTOSIS	5	0.774512	1.33309	0.126984	0.307742	1
REACTOME_ACETYLCHOLINE_BINDING_AND_DOWNSTREAM_EVENTS	7	0.714175	1.32721	0.130785	0.317414	1
REACTOME_TRANSPORT_OF_FATTY_ACIDS	5	0.782846	1.32713	0.132296	0.316108	1
REACTOME_FORMATION_OF_THE_EARLY_ELONGATION_COMPLEX	33	0.494598	1.32661	0.0881764	0.315666	1
REACTOME_SYNTHESIS_OF_GDP_MANNOSE	5	0.780998	1.3256	0.111328	0.316128	1
REACTOME_GLYCOGEN_SYNTHESIS	15	0.586704	1.325	0.123529	0.315842	1
REACTOME_DISEASES_ASSOCIATED_WITH_N_GLYCOSYLATION_OF_PROTEINS	17	0.569789	1.32308	0.130261	0.317929	1
REACTOME_DNA_DAMAGE_RECOGNITION_IN_GG_NER	38	0.475687	1.32197	0.092827	0.318613	1
REACTOME_LDL_CLEARANCE	19	0.546028	1.31802	0.119826	0.324768	1
REACTOME_NUCLEAR_ENVELOPE_NE_REASSEMBLY	72	0.426823	1.31692	0.0431818	0.325368	1
REACTOME_GLYCOGEN_STORAGE_DISEASES	15	0.582351	1.31623	0.152401	0.325162	1
REACTOME_SIGNALING_BY_THE_B_CELL_RECEPTOR_BCR	104	0.395074	1.31312	0.043578	0.329957	1
REACTOME_PINK_PARKIN_MEDIATED_MITOPHAGY	20	0.540286	1.30826	0.123967	0.337933	1
REACTOME_METABOLISM_OF_NITRIC_OXIDE_ENOS_ACTIVATION_AND_REGULATION	15	0.587932	1.30819	0.138716	0.336576	1
REACTOME_DEGRADATION_OF_AXIN	54	0.44248	1.30632	0.0770925	0.338558	1
REACTOME_HIV_TRANSCRIPTION_INITIATION	46	0.45657	1.30576	0.0979955	0.338131	1
REACTOME_SIGNALING_BY_FGFR	74	0.414437	1.30496	0.0584416	0.338154	1
REACTOME_SYNTHESIS_SECRETION_AND_DEACYLATION_OF_GHRELIN	11	0.633366	1.30459	0.146199	0.337417	1
REACTOME_SULFIDE_OXIDATION_TO_SULFATE	6	0.734363	1.30436	0.146881	0.33651	1
REACTOME_GLUTATHIONE_CONJUGATION	29	0.502811	1.30434	0.109053	0.33512	1
REACTOME_M_PHASE	348	0.34471	1.30408	0.00549451	0.334199	1
REACTOME_SIGNALING_BY_FGFR2	63	0.432272	1.3039	0.0746606	0.333083	1
REACTOME_PROTEIN_REPAIR	6	0.728721	1.3018	0.150101	0.335608	1
REACTOME_RECYCLING_OF_EIF2_GDP	8	0.65711	1.29673	0.166667	0.343732	1
REACTOME_DERMATAN_SULFATE_BIOSYNTHESIS	8	0.669776	1.29593	0.152083	0.343913	1
REACTOME_UCH_PROTEINASES	83	0.410377	1.2948	0.0651685	0.344703	1
REACTOME_MITOTIC_SPINDLE_CHECKPOINT	109	0.39219	1.29447	0.0404762	0.343916	1
REACTOME_SIGNALING_BY_FGFR2_IN_DISEASE	34	0.479722	1.29393	0.0995763	0.34376	1
REACTOME_MITOCHONDRIAL_IRON_SULFUR_CLUSTER_BIOGENESIS	13	0.588055	1.29113	0.167024	0.347872	1
REACTOME_RESOLUTION_OF_SISTER_CHROMATID_COHESION	121	0.384337	1.28707	0.0634146	0.354183	1
REACTOME_TNFR2_NON_CANONICAL_NF_KB_PATHWAY	84	0.408331	1.28639	0.0751708	0.354128	1
REACTOME_HISTIDINE_CATABOLISM	6	0.719646	1.28584	0.167939	0.353812	1
REACTOME_IRAK1_RECRUITS_IKK_COMPLEX	14	0.572895	1.28543	0.166667	0.353252	1
REACTOME_HIV_ELONGATION_ARREST_AND_RECOVERY	32	0.479324	1.28372	0.124183	0.355039	1
REACTOME_METHIONINE_SALVAGE_PATHWAY	6	0.705778	1.28156	0.174257	0.357962	1
REACTOME_LIPOPHAGY	9	0.650791	1.28122	0.169355	0.357166	1
REACTOME_COPI_INDEPENDENT_GOLGI_TO_ER_RETROGRADE_TRAFFIC	48	0.440654	1.28039	0.1	0.357362	1
REACTOME_PHASE_II_CONJUGATION_OF_COMPOUNDS	97	0.392776	1.27837	0.0676328	0.360205	1
REACTOME_DNA_REPLICATION_INITIATION	8	0.659898	1.27774	0.223361	0.36003	1
REACTOME_PROCESSING_OF_DNA_DOUBLE_STRAND_BREAK_ENDS	63	0.422061	1.27616	0.0982143	0.361525	1
REACTOME_INTERLEUKIN_1_SIGNALING	97	0.391542	1.27172	0.0691964	0.368743	1
REACTOME_DISPLACEMENT_OF_DNA_GLYCOSYLASE_BY_APEX1	9	0.636714	1.26749	0.199179	0.375621	1
REACTOME_METHYLATION	14	0.576661	1.2638	0.187251	0.38148	1
REACTOME_CDC6_ASSOCIATION_WITH_THE_ORC_ORIGIN_COMPLEX	11	0.607375	1.26097	0.196998	0.385691	1
REACTOME_TP53_REGULATES_TRANSCRIPTION_OF_GENES_INVOLVED_IN_G2_CELL_CYCLE_ARREST	18	0.538666	1.2593	0.1639	0.387597	1
REACTOME_DEFECTIVE_CHST14_CAUSES_EDS_MUSCULOCONTRACTURAL_TYPE	6	0.706903	1.25715	0.196721	0.39045	1
REACTOME_ONCOGENE_INDUCED_SENESCENCE	33	0.469778	1.25584	0.138365	0.391572	1
REACTOME_ACTIVATION_OF_NMDA_RECEPTORS_AND_POSTSYNAPTIC_EVENTS	83	0.386917	1.25548	0.0798122	0.390943	1
REACTOME_GENE_SILENCING_BY_RNA	70	0.409941	1.25284	0.0983982	0.395067	1
REACTOME_MITOTIC_G2_G2_M_PHASES	194	0.351305	1.24938	0.0479798	0.40065	1
REACTOME_GDP_FUCOSE_BIOSYNTHESIS	5	0.720063	1.24906	0.2	0.399892	1
REACTOME_INHIBITION_OF_THE_PROTEOLYTIC_ACTIVITY_OF_APC_C_REQUIRED_FOR_THE_ONSET_OF_ANAPHASE_BY_MITOTIC_SPINDLE_CHECKPOINT_COMPONENTS	20	0.518988	1.24857	0.189732	0.399352	1
REACTOME_PCP_CE_PATHWAY	87	0.394214	1.24643	0.0835267	0.402245	1
REACTOME_ANTIMICROBIAL_PEPTIDES	27	0.47122	1.24352	0.152866	0.406784	1
REACTOME_HOMOLOGOUS_DNA_PAIRING_AND_STRAND_EXCHANGE	42	0.442646	1.24142	0.155136	0.409443	1
REACTOME_RRNA_PROCESSING_IN_THE_MITOCHONDRION	11	0.583671	1.24001	0.209393	0.410885	1
REACTOME_DEFECTIVE_C1GALT1C1_CAUSES_TN_POLYAGGLUTINATION_SYNDROME_TNPS	16	0.52868	1.23782	0.173745	0.413972	1
REACTOME_DISEASES_OF_CARBOHYDRATE_METABOLISM	33	0.460146	1.23731	0.158635	0.413567	1
REACTOME_PURINE_CATABOLISM	17	0.530357	1.23665	0.210744	0.413489	1
REACTOME_SUMOYLATION_OF_DNA_REPLICATION_PROTEINS	45	0.42581	1.23558	0.138767	0.414342	1
REACTOME_RNA_POLYMERASE_III_TRANSCRIPTION_INITIATION_FROM_TYPE_3_PROMOTER	28	0.485143	1.23528	0.176221	0.413455	1
REACTOME_APOBEC3G_MEDIATED_RESISTANCE_TO_HIV_1_INFECTION	5	0.730844	1.23503	0.217742	0.412476	1
REACTOME_HIV_TRANSCRIPTION_ELONGATION	42	0.439191	1.22993	0.148594	0.421546	1
REACTOME_CLEC7A_DECTIN_1_SIGNALING	96	0.380802	1.22808	0.102625	0.423859	1
REACTOME_FORMATION_OF_INCISION_COMPLEX_IN_GG_NER	43	0.436715	1.22673	0.160183	0.425254	1
REACTOME_RIPK1_MEDIATED_REGULATED_NECROSIS	19	0.507532	1.22376	0.201271	0.429958	1
REACTOME_RECYCLING_PATHWAY_OF_L1	45	0.428528	1.22339	0.164009	0.42919	1
REACTOME_RNA_POLYMERASE_III_TRANSCRIPTION	41	0.43763	1.2187	0.174797	0.437473	1
REACTOME_RESPONSE_OF_MTB_TO_PHAGOCYTOSIS	21	0.491623	1.21833	0.193206	0.436693	1
REACTOME_GLYCOGEN_BREAKDOWN_GLYCOGENOLYSIS	14	0.554788	1.21205	0.240175	0.448651	1
REACTOME_RESOLUTION_OF_D_LOOP_STRUCTURES_THROUGH_SYNTHESIS_DEPENDENT_STRAND_ANNEALING_SDSA	26	0.472352	1.21106	0.22379	0.449131	1
REACTOME_INFECTION_WITH_MYCOBACTERIUM_TUBERCULOSIS	25	0.477566	1.209	0.206166	0.452078	1
REACTOME_PREGNENOLONE_BIOSYNTHESIS	11	0.570631	1.20852	0.261053	0.451546	1
REACTOME_TRANSCRIPTION_OF_THE_HIV_GENOME	68	0.387052	1.20619	0.118881	0.454695	1
REACTOME_TRANSLOCATION_OF_SLC2A4_GLUT4_TO_THE_PLASMA_MEMBRANE	68	0.389654	1.20517	0.147806	0.455381	1
REACTOME_TRAFFICKING_OF_MYRISTOYLATED_PROTEINS_TO_THE_CILIUM	5	0.699297	1.20471	0.263462	0.454796	1
REACTOME_ACTIVATION_OF_RAC1_DOWNSTREAM_OF_NMDARS	7	0.633335	1.19758	0.255489	0.468403	1
REACTOME_CYCLIN_D_ASSOCIATED_EVENTS_IN_G1	43	0.426393	1.19392	0.2	0.47512	1
REACTOME_PHOSPHORYLATION_OF_THE_APC_C	19	0.508211	1.19275	0.246809	0.475903	1
REACTOME_DISORDERS_OF_TRANSMEMBRANE_TRANSPORTERS	162	0.337336	1.19242	0.111421	0.474966	1
REACTOME_ASPARAGINE_N_LINKED_GLYCOSYLATION	285	0.321713	1.19155	0.0486486	0.475308	1
REACTOME_C_TYPE_LECTIN_RECEPTORS_CLRS	131	0.34888	1.18845	0.116822	0.480375	1
REACTOME_HIV_LIFE_CYCLE	145	0.345615	1.18778	0.117073	0.480282	1
REACTOME_RESOLUTION_OF_D_LOOP_STRUCTURES	33	0.440229	1.18475	0.215217	0.485382	1
REACTOME_TRANSPORT_AND_SYNTHESIS_OF_PAPS	6	0.659698	1.18394	0.300971	0.485551	1
REACTOME_ADVANCED_GLYCOSYLATION_ENDPRODUCT_RECEPTOR_SIGNALING	11	0.564248	1.18344	0.267606	0.485105	1
REACTOME_INTEGRATION_OF_PROVIRUS	9	0.59083	1.18049	0.282158	0.490149	1
REACTOME_NUCLEOBASE_CATABOLISM	33	0.438692	1.18043	0.206522	0.488627	1
REACTOME_DEFECTIVE_CHSY1_CAUSES_TPBS	6	0.662377	1.18042	0.28655	0.487038	1
REACTOME_PTK6_REGULATES_RTKS_AND_THEIR_EFFECTORS_AKT1_AND_DOK1	8	0.598712	1.17105	0.300181	0.506205	1
REACTOME_RUNX3_REGULATES_IMMUNE_RESPONSE_AND_CELL_MIGRATION	6	0.649311	1.17044	0.298805	0.505932	1
REACTOME_PROSTACYCLIN_SIGNALLING_THROUGH_PROSTACYCLIN_RECEPTOR	15	0.511777	1.16642	0.258317	0.513313	1
REACTOME_MITOTIC_PROMETAPHASE	198	0.325436	1.16578	0.112272	0.513246	1
REACTOME_KINESINS	55	0.38799	1.16462	0.21087	0.514232	1
REACTOME_FGFR1_LIGAND_BINDING_AND_ACTIVATION	8	0.597852	1.16309	0.310547	0.516117	1
REACTOME_PREVENTION_OF_PHAGOSOMAL_LYSOSOMAL_FUSION	9	0.58083	1.16268	0.301181	0.515259	1
REACTOME_SYNTHESIS_OF_12_EICOSATETRAENOIC_ACID_DERIVATIVES	5	0.681552	1.16095	0.304924	0.517582	1
REACTOME_TRANSCRIPTIONAL_REGULATION_BY_RUNX2	107	0.355157	1.16087	0.153664	0.516107	1
REACTOME_BETA_OXIDATION_OF_LAUROYL_COA_TO_DECANOYL_COA_COA	5	0.679318	1.16051	0.319149	0.515239	1
REACTOME_FGFR2_LIGAND_BINDING_AND_ACTIVATION	10	0.571186	1.16024	0.277433	0.514229	1
REACTOME_NUCLEOTIDE_SALVAGE	23	0.464408	1.16016	0.22332	0.512775	1
REACTOME_TRANSPORT_OF_MATURE_TRANSCRIPT_TO_CYTOPLASM	80	0.366136	1.15658	0.214458	0.519019	1
REACTOME_CHYLOMICRON_ASSEMBLY	10	0.570288	1.15541	0.297778	0.519983	1
REACTOME_GLYCOSAMINOGLYCAN_METABOLISM	110	0.353424	1.15468	0.181406	0.519917	1
REACTOME_REGULATION_OF_TLR_BY_ENDOGENOUS_LIGAND	15	0.511575	1.15385	0.268145	0.520162	1
REACTOME_SYNTHESIS_OF_UDP_N_ACETYL_GLUCOSAMINE	7	0.62209	1.1518	0.311663	0.523218	1
REACTOME_TRISTETRAPROLIN_TTP_ZFP36_BINDS_AND_DESTABILIZES_MRNA	17	0.497342	1.15073	0.294363	0.523999	1
REACTOME_CHYLOMICRON_REMODELING	8	0.594584	1.14974	0.306554	0.524568	1
REACTOME_POST_TRANSLATIONAL_MODIFICATION_SYNTHESIS_OF_GPI_ANCHORED_PROTEINS	65	0.375747	1.14453	0.21513	0.534881	1
REACTOME_SODIUM_CALCIUM_EXCHANGERS	9	0.576382	1.14418	0.301724	0.534035	1
REACTOME_CHK1_CHK2_CDS1_MEDIATED_INACTIVATION_OF_CYCLIN_B_CDK1_COMPLEX	13	0.523346	1.14294	0.302187	0.535277	1
REACTOME_SYNTHESIS_OF_PROSTAGLANDINS_PG_AND_THROMBOXANES_TX	13	0.530151	1.14109	0.297352	0.537846	1
REACTOME_HCMV_EARLY_EVENTS	71	0.367837	1.13593	0.234783	0.547995	1
REACTOME_CHEMOKINE_RECEPTORS_BIND_CHEMOKINES	24	0.441788	1.13582	0.282306	0.546608	1
REACTOME_FGFR2B_LIGAND_BINDING_AND_ACTIVATION	7	0.610937	1.13292	0.340249	0.55156	1
REACTOME_TCR_SIGNALING	98	0.346592	1.13281	0.194508	0.550169	1
REACTOME_CONVERSION_FROM_APC_C_CDC20_TO_APC_C_CDH1_IN_LATE_ANAPHASE	19	0.480943	1.13032	0.325052	0.554334	1
REACTOME_PRESYNAPTIC_FUNCTION_OF_KAINATE_RECEPTORS	18	0.464095	1.13009	0.276231	0.553132	1
REACTOME_RHO_GTPASES_ACTIVATE_FORMINS	135	0.330868	1.13002	0.1959	0.551705	1
REACTOME_GLUCAGON_SIGNALING_IN_METABOLIC_REGULATION	26	0.443138	1.12863	0.272926	0.553163	1
REACTOME_MHC_CLASS_II_ANTIGEN_PRESENTATION	106	0.339326	1.127	0.195489	0.555118	1
REACTOME_DISEASES_OF_METABOLISM	223	0.308842	1.12495	0.136691	0.558134	1
REACTOME_BUTYRATE_RESPONSE_FACTOR_1_BRF1_BINDS_AND_DESTABILIZES_MRNA	17	0.485065	1.12234	0.300412	0.562378	1
REACTOME_ERKS_ARE_INACTIVATED	13	0.504815	1.12115	0.319672	0.563435	1
REACTOME_G_BETA_GAMMA_SIGNALLING_THROUGH_CDC42	17	0.479661	1.12025	0.305328	0.56378	1
REACTOME_SYNTHESIS_OF_5_EICOSATETRAENOIC_ACIDS	8	0.581906	1.1188	0.360784	0.565425	1
REACTOME_TP53_REGULATES_METABOLIC_GENES	85	0.3486	1.11755	0.248756	0.566717	1
REACTOME_INTERLEUKIN_12_SIGNALING	42	0.401249	1.11631	0.277056	0.568034	1
REACTOME_NEUROTRANSMITTER_RECEPTORS_AND_POSTSYNAPTIC_SIGNAL_TRANSMISSION	170	0.319727	1.11475	0.192105	0.569921	1
REACTOME_DEFECTIVE_CHST6_CAUSES_MCDC1	7	0.592079	1.11337	0.356299	0.571542	1
REACTOME_CHONDROITIN_SULFATE_BIOSYNTHESIS	18	0.478279	1.11227	0.318565	0.572421	1
REACTOME_GLUTAMATE_AND_GLUTAMINE_METABOLISM	14	0.507052	1.11191	0.32449	0.571596	1
REACTOME_NEUTROPHIL_DEGRANULATION	406	0.290582	1.1115	0.130303	0.57083	1
REACTOME_TRANSCRIPTIONAL_REGULATION_BY_SMALL_RNAS	46	0.386642	1.10826	0.2713	0.57664	1
REACTOME_CILIUM_ASSEMBLY	194	0.313084	1.10801	0.177215	0.575603	1
REACTOME_PHASE_4_RESTING_MEMBRANE_POTENTIAL	7	0.601123	1.10745	0.388031	0.575317	1
REACTOME_FGFR2C_LIGAND_BINDING_AND_ACTIVATION	6	0.620322	1.10669	0.361702	0.575365	1
REACTOME_GLUCAGON_TYPE_LIGAND_RECEPTORS	22	0.448742	1.1052	0.32967	0.577118	1
REACTOME_PURINE_SALVAGE	13	0.512104	1.10413	0.336864	0.57784	1
REACTOME_DEFECTS_IN_COBALAMIN_B12_METABOLISM	13	0.50613	1.10274	0.337325	0.579506	1
REACTOME_INSERTION_OF_TAIL_ANCHORED_PROTEINS_INTO_THE_ENDOPLASMIC_RETICULUM_MEMBRANE	20	0.45293	1.10197	0.33264	0.579704	1
REACTOME_CYTOSOLIC_SULFONATION_OF_SMALL_MOLECULES	21	0.453279	1.09736	0.331288	0.588432	1
REACTOME_VITAMIN_B1_THIAMIN_METABOLISM	5	0.630815	1.09619	0.369732	0.589545	1
REACTOME_RHO_GTPASES_ACTIVATE_RHOTEKIN_AND_RHOPHILINS	8	0.563114	1.09113	0.365591	0.599625	1
REACTOME_BINDING_AND_UPTAKE_OF_LIGANDS_BY_SCAVENGER_RECEPTORS	40	0.387876	1.0853	0.328194	0.61134	1
REACTOME_RECRUITMENT_OF_NUMA_TO_MITOTIC_CENTROSOMES	91	0.337358	1.08442	0.267857	0.6117	1
REACTOME_VITAMIN_D_CALCIFEROL_METABOLISM	11	0.52781	1.0827	0.373717	0.614119	1
REACTOME_G2_M_DNA_DAMAGE_CHECKPOINT	61	0.359137	1.08137	0.298611	0.615505	1
REACTOME_NEF_MEDIATED_DOWNREGULATION_OF_MHC_CLASS_I_COMPLEX_CELL_SURFACE_EXPRESSION	10	0.540934	1.08111	0.383268	0.614433	1
REACTOME_SYNTHESIS_OF_DOLICHYL_PHOSPHATE	6	0.6072	1.07983	0.412863	0.615917	1
REACTOME_IKK_COMPLEX_RECRUITMENT_MEDIATED_BY_RIP1	23	0.440621	1.07833	0.346983	0.617787	1
REACTOME_CREB1_PHOSPHORYLATION_THROUGH_THE_ACTIVATION_OF_ADENYLATE_CYCLASE	10	0.52203	1.07753	0.394531	0.617916	1
REACTOME_STING_MEDIATED_INDUCTION_OF_HOST_IMMUNE_RESPONSES	13	0.487139	1.07655	0.385542	0.618568	1
REACTOME_RRNA_MODIFICATION_IN_THE_MITOCHONDRION	8	0.55713	1.0762	0.40396	0.617754	1
REACTOME_ZINC_INFLUX_INTO_CELLS_BY_THE_SLC39_GENE_FAMILY	9	0.546606	1.07441	0.39645	0.620064	1
REACTOME_BETA_OXIDATION_OF_OCTANOYL_COA_TO_HEXANOYL_COA	5	0.63433	1.07329	0.423154	0.621032	1
REACTOME_GPCR_LIGAND_BINDING	221	0.298536	1.07196	0.268354	0.622598	1
REACTOME_TRANSPORT_OF_VITAMINS_NUCLEOSIDES_AND_RELATED_MOLECULES	38	0.39055	1.07101	0.356195	0.622993	1
REACTOME_FGFR1C_LIGAND_BINDING_AND_ACTIVATION	6	0.59587	1.06981	0.410638	0.624018	1
REACTOME_RHO_GTPASES_ACTIVATE_IQGAPS	28	0.406681	1.06902	0.355509	0.624282	1
REACTOME_INTERLEUKIN_1_FAMILY_SIGNALING	122	0.314593	1.06234	0.305239	0.638546	1
REACTOME_ERYTHROCYTES_TAKE_UP_OXYGEN_AND_RELEASE_CARBON_DIOXIDE	5	0.613046	1.06227	0.443548	0.637018	1
REACTOME_GLYOXYLATE_METABOLISM_AND_GLYCINE_DEGRADATION	30	0.407941	1.05968	0.355556	0.641378	1
REACTOME_COBALAMIN_CBL_VITAMIN_B12_TRANSPORT_AND_METABOLISM	15	0.463264	1.05952	0.392562	0.640095	1
REACTOME_PTK6_REGULATES_CELL_CYCLE	5	0.611463	1.0538	0.459883	0.651677	1
REACTOME_N_GLYCAN_TRIMMING_IN_THE_ER_AND_CALNEXIN_CALRETICULIN_CYCLE	34	0.394543	1.05248	0.343096	0.653222	1
REACTOME_TICAM1_RIP1_MEDIATED_IKK_COMPLEX_RECRUITMENT	19	0.44745	1.0512	0.382664	0.654476	1
REACTOME_RUNX2_REGULATES_GENES_INVOLVED_IN_CELL_MIGRATION	6	0.580296	1.05093	0.450902	0.653403	1
REACTOME_TRANSMISSION_ACROSS_CHEMICAL_SYNAPSES	225	0.289845	1.0481	0.325758	0.658469	1
REACTOME_PURINE_RIBONUCLEOSIDE_MONOPHOSPHATE_BIOSYNTHESIS	10	0.521646	1.04545	0.418327	0.662996	1
REACTOME_RAS_SIGNALING_DOWNSTREAM_OF_NF1_LOSS_OF_FUNCTION_VARIANTS	6	0.56675	1.03968	0.445361	0.675125	1
REACTOME_SIGNALING_BY_RETINOIC_ACID	36	0.372588	1.03855	0.363229	0.6761	1
REACTOME_SCAVENGING_OF_HEME_FROM_PLASMA	13	0.482027	1.03793	0.416327	0.67583	1
REACTOME_REVERSIBLE_HYDRATION_OF_CARBON_DIOXIDE	9	0.526545	1.03083	0.449275	0.69159	1
REACTOME_TP53_REGULATES_TRANSCRIPTION_OF_CELL_CYCLE_GENES	48	0.353507	1.03049	0.396861	0.690557	1
REACTOME_FC_EPSILON_RECEPTOR_FCERI_SIGNALING	127	0.304128	1.03011	0.382075	0.689782	1
REACTOME_MISSPLICED_LRP5_MUTANTS_HAVE_ENHANCED_BETA_CATENIN_DEPENDENT_SIGNALING	5	0.611187	1.02973	0.490157	0.688943	1
REACTOME_CYTOSOLIC_TRNA_AMINOACYLATION	6	0.590174	1.0283	0.483019	0.690595	1
REACTOME_AUTOPHAGY	141	0.29732	1.02807	0.363636	0.689348	1
REACTOME_TRIGLYCERIDE_METABOLISM	28	0.393587	1.02776	0.420502	0.688354	1
REACTOME_NEDDYLATION	220	0.286021	1.0277	0.351485	0.68673	1
REACTOME_ACTIVATION_OF_BAD_AND_TRANSLOCATION_TO_MITOCHONDRIA	15	0.455695	1.02404	0.411765	0.693746	1
REACTOME_AFLATOXIN_ACTIVATION_AND_DETOXIFICATION	15	0.456875	1.02071	0.436526	0.700203	1
REACTOME_METABOLISM_OF_VITAMINS_AND_COFACTORS	171	0.288956	1.01898	0.391626	0.702703	1
REACTOME_RNA_POLYMERASE_I_TRANSCRIPTION_TERMINATION	31	0.382572	1.01892	0.425577	0.7011	1
REACTOME_RETINOID_CYCLE_DISEASE_EVENTS	8	0.525019	1.01846	0.457806	0.700438	1
REACTOME_IRON_UPTAKE_AND_TRANSPORT	51	0.34953	1.01792	0.397753	0.699948	1
REACTOME_POU5F1_OCT4_SOX2_NANOG_REPRESS_GENES_RELATED_TO_DIFFERENTIATION	8	0.532202	1.01713	0.460744	0.700235	1
REACTOME_COPI_MEDIATED_ANTEROGRADE_TRANSPORT	94	0.315113	1.01695	0.387168	0.698923	1
REACTOME_REGULATION_BY_C_FLIP	10	0.493007	1.01629	0.446465	0.698864	1
REACTOME_HCMV_INFECTION	95	0.310869	1.01523	0.409953	0.699785	1
REACTOME_IRF3_MEDIATED_INDUCTION_OF_TYPE_I_IFN	11	0.490874	1.01132	0.459245	0.707522	1
REACTOME_BETA_CATENIN_INDEPENDENT_WNT_SIGNALING	136	0.297005	1.0049	0.447867	0.721467	1
REACTOME_ORGANELLE_BIOGENESIS_AND_MAINTENANCE	287	0.270734	1.00479	0.439086	0.719999	1
REACTOME_PEPTIDE_LIGAND_BINDING_RECEPTORS	88	0.311863	1.00398	0.453883	0.720171	1
REACTOME_METABOLISM_OF_CARBOHYDRATES	260	0.275323	1.00351	0.436692	0.719525	1
REACTOME_DISEASES_OF_GLYCOSYLATION	135	0.294469	1.00313	0.425791	0.71866	1
REACTOME_TFAP2A_ACTS_AS_A_TRANSCRIPTIONAL_REPRESSOR_DURING_RETINOIC_ACID_INDUCED_CELL_DIFFERENTIATION	5	0.578422	1.00158	0.506903	0.72066	1
REACTOME_LATE_ENDOSOMAL_MICROAUTOPHAGY	32	0.373688	1.00074	0.415929	0.720904	1
REACTOME_WAX_AND_PLASMALOGEN_BIOSYNTHESIS	5	0.577934	0.999205	0.491228	0.722851	1
REACTOME_PYRUVATE_METABOLISM	26	0.392792	0.993621	0.456763	0.734803	1
REACTOME_INTERLEUKIN_12_FAMILY_SIGNALING	51	0.336866	0.992165	0.4375	0.736608	1
REACTOME_RNA_POLYMERASE_II_TRANSCRIBES_SNRNA_GENES	79	0.315283	0.991474	0.469432	0.736531	1
REACTOME_SYNTHESIS_SECRETION_AND_INACTIVATION_OF_GLUCAGON_LIKE_PEPTIDE_1_GLP_1	12	0.467881	0.988629	0.498965	0.741754	1
REACTOME_NEF_MEDIATES_DOWN_MODULATION_OF_CELL_SURFACE_RECEPTORS_BY_RECRUITING_THEM_TO_CLATHRIN_ADAPTERS	20	0.404051	0.988391	0.468951	0.740544	1
REACTOME_CREATINE_METABOLISM	10	0.471311	0.987543	0.488753	0.740768	1
REACTOME_PHENYLALANINE_METABOLISM	6	0.553594	0.983844	0.537815	0.747929	1
REACTOME_MAP3K8_TPL2_DEPENDENT_MAPK1_3_ACTIVATION	16	0.43687	0.983386	0.480808	0.747264	1
REACTOME_GLUCONEOGENESIS	30	0.3749	0.982646	0.459746	0.747394	1
REACTOME_HDR_THROUGH_SINGLE_STRAND_ANNEALING_SSA	37	0.357843	0.982161	0.490446	0.746783	1
REACTOME_MITOPHAGY	27	0.368751	0.973475	0.479371	0.766266	1
REACTOME_DISEASES_ASSOCIATED_WITH_GLYCOSAMINOGLYCAN_METABOLISM	38	0.351955	0.971025	0.475375	0.770256	1
REACTOME_CALNEXIN_CALRETICULIN_CYCLE	25	0.377671	0.969062	0.525105	0.773281	1
REACTOME_PHOSPHATE_BOND_HYDROLYSIS_BY_NUDT_PROTEINS	7	0.5136	0.967271	0.540161	0.775801	1
REACTOME_REDUCTION_OF_CYTOSOLIC_CA_LEVELS	10	0.481051	0.967073	0.499018	0.774505	1
REACTOME_BRANCHED_CHAIN_AMINO_ACID_CATABOLISM	21	0.396904	0.965493	0.502982	0.776666	1
REACTOME_PHENYLALANINE_AND_TYROSINE_METABOLISM	11	0.460108	0.963544	0.505906	0.779551	1
REACTOME_COPI_DEPENDENT_GOLGI_TO_ER_RETROGRADE_TRAFFIC	94	0.29935	0.961166	0.517937	0.783586	1
REACTOME_PLASMA_LIPOPROTEIN_CLEARANCE	31	0.365778	0.961111	0.5138	0.781943	1
REACTOME_FRUCTOSE_METABOLISM	7	0.514236	0.960769	0.528942	0.780982	1
REACTOME_INHIBITION_OF_REPLICATION_INITIATION_OF_DAMAGED_DNA_BY_RB1_E2F1	13	0.437171	0.96055	0.505112	0.779733	1
REACTOME_COOPERATION_OF_PDCL_PHLP1_AND_TRIC_CCT_IN_G_PROTEIN_BETA_FOLDING	35	0.348181	0.958203	0.534632	0.783612	1
REACTOME_PYRIMIDINE_SALVAGE	11	0.461639	0.957925	0.543033	0.782487	1
REACTOME_TCF_DEPENDENT_SIGNALING_IN_RESPONSE_TO_WNT	152	0.276629	0.95522	0.576112	0.786992	1
REACTOME_SMAC_XIAP_REGULATED_APOPTOTIC_RESPONSE	7	0.51723	0.953396	0.534304	0.78979	1
REACTOME_G_BETA_GAMMA_SIGNALLING_THROUGH_PI3KGAMMA	22	0.393715	0.951194	0.514228	0.793622	1
REACTOME_PLATELET_CALCIUM_HOMEOSTASIS	20	0.393692	0.949856	0.529412	0.795159	1
REACTOME_BASE_EXCISION_REPAIR_AP_SITE_FORMATION	17	0.409369	0.948497	0.525988	0.796804	1
REACTOME_IRE1ALPHA_ACTIVATES_CHAPERONES	49	0.323435	0.947745	0.548319	0.796753	1
REACTOME_METABOLISM_OF_FAT_SOLUBLE_VITAMINS	42	0.342617	0.946558	0.550111	0.797827	1
REACTOME_A_TETRASACCHARIDE_LINKER_SEQUENCE_IS_REQUIRED_FOR_GAG_SYNTHESIS	24	0.377388	0.943704	0.552083	0.802961	1
REACTOME_POSITIVE_EPIGENETIC_REGULATION_OF_RRNA_EXPRESSION	46	0.325395	0.94282	0.5671	0.803399	1
REACTOME_TLR3_MEDIATED_TICAM1_DEPENDENT_PROGRAMMED_CELL_DEATH	6	0.536836	0.939245	0.584795	0.810248	1
REACTOME_RNA_POLYMERASE_I_PROMOTER_ESCAPE	31	0.361038	0.939229	0.563348	0.808481	1
REACTOME_MITOCHONDRIAL_FATTY_ACID_BETA_OXIDATION	35	0.349558	0.937379	0.574236	0.811111	1
REACTOME_NEGATIVE_REGULATION_OF_FGFR2_SIGNALING	25	0.366794	0.937263	0.551579	0.809635	1
REACTOME_TRANSCRIPTIONAL_REGULATION_BY_E2F6	34	0.344148	0.937175	0.574113	0.80808	1
REACTOME_SURFACTANT_METABOLISM	21	0.383108	0.936753	0.528261	0.807329	1
REACTOME_GLUCURONIDATION	24	0.369004	0.934083	0.531381	0.812117	1
REACTOME_FOLDING_OF_ACTIN_BY_CCT_TRIC	10	0.451765	0.933122	0.571992	0.812605	1
REACTOME_TP53_REGULATES_TRANSCRIPTION_OF_GENES_INVOLVED_IN_G1_CELL_CYCLE_ARREST	13	0.426123	0.932924	0.55	0.811312	1
REACTOME_UPTAKE_AND_FUNCTION_OF_ANTHRAX_TOXINS	11	0.437144	0.931263	0.555794	0.81349	1
REACTOME_NUCLEOBASE_BIOSYNTHESIS	13	0.431496	0.93091	0.576763	0.812596	1
REACTOME_FORMATION_OF_RNA_POL_II_ELONGATION_COMPLEX	57	0.311503	0.930431	0.567982	0.811979	1
REACTOME_ACTIVATED_NTRK2_SIGNALS_THROUGH_CDK5	5	0.549737	0.929956	0.59761	0.811406	1
REACTOME_G_PROTEIN_BETA_GAMMA_SIGNALLING	28	0.355807	0.929944	0.555085	0.809675	1
REACTOME_REGULATION_OF_LOCALIZATION_OF_FOXO_TRANSCRIPTION_FACTORS	11	0.44602	0.929063	0.558943	0.810115	1
REACTOME_BBSOME_MEDIATED_CARGO_TARGETING_TO_CILIUM	23	0.373553	0.925462	0.555556	0.816827	1
REACTOME_ACTIVATION_OF_CASPASES_THROUGH_APOPTOSOME_MEDIATED_CLEAVAGE	6	0.532042	0.924753	0.600783	0.816827	1
REACTOME_BETA_OXIDATION_OF_DECANOYL_COA_TO_OCTANOYL_COA_COA	6	0.521832	0.92349	0.596838	0.818034	1
REACTOME_SUPPRESSION_OF_PHAGOSOMAL_MATURATION	13	0.425814	0.922405	0.572025	0.818832	1
REACTOME_AURKA_ACTIVATION_BY_TPX2	72	0.293695	0.921605	0.584783	0.819032	1
REACTOME_HEME_DEGRADATION	13	0.428609	0.920678	0.580777	0.819554	1
REACTOME_TRANSCRIPTIONAL_REGULATION_BY_RUNX3	94	0.286154	0.920485	0.626728	0.818259	1
REACTOME_PLATELET_ADHESION_TO_EXPOSED_COLLAGEN	12	0.426463	0.918309	0.554878	0.821783	1
REACTOME_NF_KB_ACTIVATION_THROUGH_FADD_RIP_1_PATHWAY_MEDIATED_BY_CASPASE_8_AND_10	12	0.437887	0.917311	0.57438	0.822373	1
REACTOME_RNA_POLYMERASE_I_TRANSCRIPTION	51	0.311809	0.915397	0.632017	0.825069	1
REACTOME_REGULATION_OF_TP53_ACTIVITY_THROUGH_PHOSPHORYLATION	90	0.280829	0.914918	0.671111	0.824455	1
REACTOME_SULFUR_AMINO_ACID_METABOLISM	27	0.355159	0.913399	0.587629	0.826286	1
REACTOME_REGULATION_OF_PLK1_ACTIVITY_AT_G2_M_TRANSITION	87	0.283492	0.912533	0.646667	0.826572	1
REACTOME_POTASSIUM_CHANNELS	68	0.297136	0.911032	0.641892	0.828274	1
REACTOME_PHOSPHATE_BOND_HYDROLYSIS_BY_NTPDASE_PROTEINS	7	0.480903	0.910959	0.603206	0.826676	1
REACTOME_NEGATIVE_REGULATION_OF_TCF_DEPENDENT_SIGNALING_BY_WNT_LIGAND_ANTAGONISTS	6	0.502301	0.910293	0.591102	0.826449	1
REACTOME_PEROXISOMAL_PROTEIN_IMPORT	63	0.299832	0.910156	0.651972	0.825096	1
REACTOME_BIOLOGICAL_OXIDATIONS	185	0.257195	0.907014	0.758621	0.830646	1
REACTOME_FBXW7_MUTANTS_AND_NOTCH1_IN_CANCER	5	0.534504	0.906647	0.621622	0.829731	1
REACTOME_TRAFFICKING_AND_PROCESSING_OF_ENDOSOMAL_TLR	12	0.420895	0.903141	0.584179	0.835928	1
REACTOME_DARPP_32_EVENTS	21	0.371678	0.899938	0.600441	0.841405	1
REACTOME_TRIF_MEDIATED_PROGRAMMED_CELL_DEATH	9	0.449304	0.898145	0.615866	0.843663	1
REACTOME_MTORC1_MEDIATED_SIGNALLING	23	0.355989	0.894604	0.64135	0.849861	1
REACTOME_DIGESTION	10	0.436466	0.894053	0.611881	0.849341	1
REACTOME_PYRIMIDINE_CATABOLISM	10	0.439199	0.892221	0.603774	0.851664	1
REACTOME_VISUAL_PHOTOTRANSDUCTION	74	0.287828	0.890904	0.683453	0.852865	1
REACTOME_THE_ROLE_OF_NEF_IN_HIV_1_REPLICATION_AND_DISEASE_PATHOGENESIS	25	0.349205	0.888275	0.623656	0.857088	1
REACTOME_RNA_POLYMERASE_I_TRANSCRIPTION_INITIATION	47	0.310874	0.884889	0.684834	0.862664	1
REACTOME_GOLGI_TO_ER_RETROGRADE_TRANSPORT	127	0.261942	0.882839	0.744921	0.865446	1
REACTOME_PKA_MEDIATED_PHOSPHORYLATION_OF_CREB	17	0.379853	0.882611	0.628283	0.864273	1
REACTOME_PYRUVATE_METABOLISM_AND_CITRIC_ACID_TCA_CYCLE	50	0.301864	0.880133	0.695455	0.867876	1
REACTOME_DOWNREGULATION_OF_ERBB2_ERBB3_SIGNALING	13	0.407472	0.879989	0.611344	0.866422	1
REACTOME_TRAIL_SIGNALING	8	0.455158	0.879771	0.608696	0.865142	1
REACTOME_SENESCENCE_ASSOCIATED_SECRETORY_PHENOTYPE_SASP	48	0.299937	0.879504	0.704017	0.863942	1
REACTOME_APOPTOSIS_INDUCED_DNA_FRAGMENTATION	7	0.468835	0.875118	0.621951	0.871912	1
REACTOME_RECRUITMENT_OF_MITOTIC_CENTROSOME_PROTEINS_AND_COMPLEXES	81	0.273064	0.874329	0.741706	0.871812	1
REACTOME_SPRY_REGULATION_OF_FGF_SIGNALING	16	0.377308	0.873326	0.653846	0.872256	1
REACTOME_ROBO_RECEPTORS_BIND_AKAP5	8	0.455856	0.873211	0.650099	0.870787	1
REACTOME_PKA_ACTIVATION_IN_GLUCAGON_SIGNALLING	14	0.39225	0.871014	0.632735	0.873852	1
REACTOME_NEURONAL_SYSTEM	327	0.231845	0.870536	0.932615	0.873112	1
REACTOME_ASSOCIATION_OF_TRIC_CCT_WITH_TARGET_PROTEINS_DURING_BIOSYNTHESIS	38	0.314954	0.869943	0.693617	0.872633	1
REACTOME_TRANSCRIPTION_OF_E2F_TARGETS_UNDER_NEGATIVE_CONTROL_BY_P107_RBL1_AND_P130_RBL2_IN_COMPLEX_WITH_HDAC1	16	0.376042	0.869421	0.651731	0.87196	1
REACTOME_GLUCAGON_LIKE_PEPTIDE_1_GLP1_REGULATES_INSULIN_SECRETION	34	0.324214	0.868218	0.653105	0.872692	1
REACTOME_MITOCHONDRIAL_FATTY_ACID_BETA_OXIDATION_OF_SATURATED_FATTY_ACIDS	10	0.430553	0.866793	0.634387	0.873997	1
REACTOME_WNT_LIGAND_BIOGENESIS_AND_TRAFFICKING	17	0.375356	0.866261	0.644172	0.873417	1
REACTOME_ADORA2B_MEDIATED_ANTI_INFLAMMATORY_CYTOKINES_PRODUCTION	68	0.278822	0.863755	0.734831	0.876898	1
REACTOME_ACTIVATION_OF_KAINATE_RECEPTORS_UPON_GLUTAMATE_BINDING	27	0.34144	0.863063	0.678571	0.876642	1
REACTOME_CASPASE_ACTIVATION_VIA_DEATH_RECEPTORS_IN_THE_PRESENCE_OF_LIGAND	15	0.382355	0.862755	0.670913	0.875562	1
REACTOME_THE_ACTIVATION_OF_ARYLSULFATASES	11	0.410399	0.861549	0.661943	0.876362	1
REACTOME_ER_QUALITY_CONTROL_COMPARTMENT_ERQC	20	0.352937	0.859031	0.67234	0.879865	1
REACTOME_ANCHORING_OF_THE_BASAL_BODY_TO_THE_PLASMA_MEMBRANE	96	0.267143	0.859031	0.811628	0.878153	1
REACTOME_FRUCTOSE_CATABOLISM	5	0.491722	0.857622	0.677485	0.879347	1
REACTOME_NEGATIVE_REGULATION_OF_FGFR4_SIGNALING	24	0.336093	0.85705	0.699374	0.878804	1
REACTOME_SYNTHESIS_OF_WYBUTOSINE_AT_G37_OF_TRNA_PHE	6	0.473428	0.854945	0.659533	0.88136	1
REACTOME_PROTON_COUPLED_MONOCARBOXYLATE_TRANSPORT	5	0.501475	0.8539	0.693582	0.881826	1
REACTOME_DOWNREGULATION_OF_ERBB4_SIGNALING	9	0.416779	0.850775	0.678227	0.886343	1
REACTOME_DEACTIVATION_OF_THE_BETA_CATENIN_TRANSACTIVATING_COMPLEX	37	0.312445	0.850289	0.705882	0.885575	1
REACTOME_SYNTHESIS_OF_PE	13	0.386291	0.849293	0.684959	0.885814	1
REACTOME_TRANSPORT_OF_THE_SLBP_DEPENDANT_MATURE_MRNA	35	0.308771	0.841559	0.731818	0.899269	1
REACTOME_NEUROTRANSMITTER_RELEASE_CYCLE	44	0.296956	0.840645	0.739229	0.899278	1
REACTOME_GLYCOLYSIS	66	0.271871	0.839676	0.82069	0.899394	1
REACTOME_RHO_GTPASES_ACTIVATE_PKNS	33	0.305733	0.837094	0.75641	0.902596	1
REACTOME_B_WICH_COMPLEX_POSITIVELY_REGULATES_RRNA_EXPRESSION	31	0.31583	0.837047	0.724846	0.900971	1
REACTOME_G_ALPHA_I_SIGNALLING_EVENTS	256	0.225296	0.836258	0.963636	0.900822	1
REACTOME_FATTY_ACID_METABOLISM	159	0.239155	0.834675	0.905237	0.902119	1
REACTOME_POSTMITOTIC_NUCLEAR_PORE_COMPLEX_NPC_REFORMATION	27	0.324916	0.834535	0.730022	0.900659	1
REACTOME_SUMO_IS_TRANSFERRED_FROM_E1_TO_E2_UBE2I_UBC9	7	0.455167	0.833596	0.683673	0.900767	1
REACTOME_SHC_RELATED_EVENTS_TRIGGERED_BY_IGF1R	9	0.419201	0.83301	0.701099	0.900092	1
REACTOME_GABA_SYNTHESIS_RELEASE_REUPTAKE_AND_DEGRADATION	17	0.358842	0.831974	0.713656	0.900423	1
REACTOME_MOLECULES_ASSOCIATED_WITH_ELASTIC_FIBRES	34	0.305015	0.828663	0.762527	0.904897	1
REACTOME_O_LINKED_GLYCOSYLATION_OF_MUCINS	55	0.280026	0.828005	0.799107	0.904337	1
REACTOME_UPTAKE_AND_ACTIONS_OF_BACTERIAL_TOXINS	28	0.317072	0.826725	0.759414	0.905009	1
REACTOME_NEGATIVE_REGULATION_OF_FGFR1_SIGNALING	25	0.324051	0.826636	0.735887	0.903476	1
REACTOME_E2F_MEDIATED_REGULATION_OF_DNA_REPLICATION	22	0.33334	0.825029	0.705645	0.904616	1
REACTOME_OLFACTORY_SIGNALING_PATHWAY	63	0.275342	0.824526	0.788991	0.903834	1
REACTOME_ALPHA_OXIDATION_OF_PHYTANATE	6	0.457482	0.824083	0.69246	0.902933	1
REACTOME_APOPTOTIC_FACTOR_MEDIATED_RESPONSE	17	0.35663	0.823461	0.728571	0.902389	1
REACTOME_METABOLISM_OF_FOLATE_AND_PTERINES	17	0.355927	0.819537	0.735484	0.907705	1
REACTOME_G_ALPHA_S_SIGNALLING_EVENTS	141	0.237925	0.817401	0.918033	0.909857	1
REACTOME_NRIF_SIGNALS_CELL_DEATH_FROM_THE_NUCLEUS	15	0.363188	0.815983	0.718884	0.910644	1
REACTOME_TRANSPORT_OF_NUCLEOSIDES_AND_FREE_PURINE_AND_PYRIMIDINE_BASES_ACROSS_THE_PLASMA_MEMBRANE	11	0.392236	0.813139	0.697872	0.913886	1
REACTOME_MULTIFUNCTIONAL_ANION_EXCHANGERS	9	0.416452	0.812852	0.733471	0.912746	1
REACTOME_SHC_MEDIATED_CASCADE_FGFR1	14	0.369042	0.809029	0.727862	0.917698	1
REACTOME_ERCC6_CSB_AND_EHMT2_G9A_POSITIVELY_REGULATE_RRNA_EXPRESSION	16	0.350599	0.808758	0.756098	0.916477	1
REACTOME_INTERACTIONS_OF_REV_WITH_HOST_CELLULAR_PROTEINS	36	0.29746	0.806732	0.791845	0.918278	1
REACTOME_G_ALPHA_Q_SIGNALLING_EVENTS	139	0.236356	0.805068	0.939394	0.919422	1
REACTOME_TP53_REGULATES_TRANSCRIPTION_OF_DNA_REPAIR_GENES	61	0.268904	0.803034	0.830588	0.921098	1
REACTOME_METALLOPROTEASE_DUBS	20	0.331128	0.799363	0.771855	0.925822	1
REACTOME_DISEASES_OF_MISMATCH_REPAIR_MMR	5	0.473799	0.798761	0.757692	0.92522	1
REACTOME_ALPHA_PROTEIN_KINASE_1_SIGNALING_PATHWAY	11	0.382787	0.797866	0.754065	0.925012	1
REACTOME_METABOLISM_OF_STEROID_HORMONES	25	0.315916	0.796939	0.772824	0.92473	1
REACTOME_TRANSCRIPTIONAL_REGULATION_BY_VENTX	35	0.291995	0.796716	0.80543	0.923418	1
REACTOME_GLYCOSPHINGOLIPID_METABOLISM	41	0.278271	0.79271	0.840355	0.928228	1
REACTOME_HDL_REMODELING	10	0.396429	0.789946	0.732535	0.930965	1
REACTOME_PHASE_1_INACTIVATION_OF_FAST_NA_CHANNELS	5	0.459297	0.785575	0.733471	0.93604	1
REACTOME_ACYL_CHAIN_REMODELLING_OF_PG	11	0.367881	0.783901	0.761134	0.936916	1
REACTOME_DEFECTS_IN_VITAMIN_AND_COFACTOR_METABOLISM	21	0.323842	0.783225	0.810235	0.93628	1
REACTOME_ERK_MAPK_TARGETS	22	0.319249	0.779259	0.799163	0.940598	1
REACTOME_MEIOSIS	50	0.270085	0.778954	0.876016	0.939389	1
REACTOME_TRANSPORT_OF_ORGANIC_ANIONS	10	0.381173	0.778571	0.750499	0.938285	1
REACTOME_REGULATION_OF_PTEN_LOCALIZATION	9	0.393228	0.774734	0.742455	0.942193	1
REACTOME_TRNA_AMINOACYLATION	24	0.308036	0.774187	0.798265	0.941264	1
REACTOME_CYTOCHROME_C_MEDIATED_APOPTOTIC_RESPONSE	13	0.350272	0.770401	0.791322	0.945147	1
REACTOME_VASOPRESSIN_REGULATES_RENAL_WATER_HOMEOSTASIS_VIA_AQUAPORINS	35	0.278238	0.755952	0.861538	0.963225	1
REACTOME_IONOTROPIC_ACTIVITY_OF_KAINATE_RECEPTORS	10	0.368935	0.753385	0.793774	0.964877	1
REACTOME_DISSOLUTION_OF_FIBRIN_CLOT	11	0.356905	0.751491	0.805845	0.965606	1
REACTOME_AKT_PHOSPHORYLATES_TARGETS_IN_THE_CYTOSOL	14	0.34452	0.750729	0.8	0.964889	1
REACTOME_TRANSPORT_OF_NUCLEOTIDE_SUGARS	9	0.382854	0.74942	0.777108	0.964943	1
REACTOME_ELEVATION_OF_CYTOSOLIC_CA2_LEVELS	10	0.368081	0.747295	0.812236	0.965839	1
REACTOME_UPTAKE_AND_FUNCTION_OF_DIPHTHERIA_TOXIN	6	0.417825	0.743296	0.774193	0.969114	1
REACTOME_DISEASES_OF_DNA_REPAIR	10	0.365762	0.741461	0.830022	0.969715	1
REACTOME_DISEASES_ASSOCIATED_WITH_GLYCOSYLATION_PRECURSOR_BIOSYNTHESIS	18	0.303815	0.732404	0.840816	0.979042	1
REACTOME_CROSS_PRESENTATION_OF_PARTICULATE_EXOGENOUS_ANTIGENS_PHAGOSOMES	6	0.41118	0.726808	0.818004	0.983935	1
REACTOME_PLATELET_HOMEOSTASIS	72	0.23413	0.726726	0.970982	0.982316	1
REACTOME_ACYL_CHAIN_REMODELLING_OF_PI	9	0.359576	0.725836	0.810591	0.981645	1
REACTOME_RAP1_SIGNALLING	14	0.318053	0.719166	0.860996	0.987244	1
REACTOME_GLUCOSE_METABOLISM	85	0.221601	0.713902	0.988636	0.991017	1
REACTOME_TP53_REGULATES_TRANSCRIPTION_OF_CASPASE_ACTIVATORS_AND_CASPASES	11	0.342096	0.713773	0.842105	0.989442	1
REACTOME_EXTRINSIC_PATHWAY_OF_FIBRIN_CLOT_FORMATION	5	0.414573	0.710619	0.829615	0.990903	1
REACTOME_PLASMA_LIPOPROTEIN_ASSEMBLY	17	0.303256	0.709449	0.871901	0.990296	1
REACTOME_SPERM_MOTILITY_AND_TAXES	7	0.359452	0.707318	0.813808	0.990629	1
REACTOME_REPRODUCTION	62	0.229957	0.705958	0.971739	0.990222	1
REACTOME_BETA_OXIDATION_OF_HEXANOYL_COA_TO_BUTANOYL_COA	5	0.410574	0.703901	0.825103	0.990426	1
REACTOME_SYNTHESIS_OF_BILE_ACIDS_AND_BILE_SALTS_VIA_24_HYDROXYCHOLESTEROL	12	0.324584	0.701456	0.857143	0.99108	1
REACTOME_ELASTIC_FIBRE_FORMATION	40	0.248783	0.700643	0.946467	0.99012	1
REACTOME_TRANSPORT_OF_MATURE_MRNAS_DERIVED_FROM_INTRONLESS_TRANSCRIPTS	42	0.241644	0.699236	0.946581	0.9898	1
REACTOME_TYROSINE_CATABOLISM	5	0.415559	0.698557	0.831418	0.988803	1
REACTOME_NICOTINATE_METABOLISM	27	0.267211	0.69703	0.921722	0.988593	1
REACTOME_FORMATION_OF_XYLULOSE_5_PHOSPHATE	5	0.405818	0.694601	0.838461	0.989172	1
REACTOME_SIALIC_ACID_METABOLISM	30	0.262922	0.689891	0.915584	0.991585	1
REACTOME_GLUTATHIONE_SYNTHESIS_AND_RECYCLING	12	0.318638	0.683191	0.862288	0.995534	1
REACTOME_REGULATION_OF_PYRUVATE_DEHYDROGENASE_PDH_COMPLEX	15	0.296583	0.682583	0.888421	0.9944	1
REACTOME_THE_PHOTOTRANSDUCTION_CASCADE	25	0.270466	0.679631	0.927632	0.995263	1
REACTOME_SUMO_IS_CONJUGATED_TO_E1_UBA2_SAE1	5	0.400079	0.678508	0.845511	0.994494	1
REACTOME_REGULATION_OF_GLYCOLYSIS_BY_FRUCTOSE_2_6_BISPHOSPHATE_METABOLISM	11	0.325947	0.677733	0.879032	0.993438	1
REACTOME_GAMMA_CARBOXYLATION_HYPUSINE_FORMATION_AND_ARYLSULFATASE_ACTIVATION	37	0.247712	0.675912	0.95671	0.99334	1
REACTOME_CREB1_PHOSPHORYLATION_THROUGH_THE_ACTIVATION_OF_CAMKII_CAMKK_CAMKIV_CASCASDE	6	0.38057	0.674182	0.873294	0.992946	1
REACTOME_MITOCHONDRIAL_TRNA_AMINOACYLATION	18	0.279431	0.671214	0.917184	0.993537	1
REACTOME_SCAVENGING_BY_CLASS_A_RECEPTORS	17	0.282533	0.666274	0.928429	0.995673	1
REACTOME_SEMA3A_PAK_DEPENDENT_AXON_REPULSION	16	0.291984	0.662519	0.916318	0.996765	1
REACTOME_ACTIVATED_NTRK3_SIGNALS_THROUGH_RAS	7	0.3543	0.660054	0.867063	0.996858	1
REACTOME_ACTIVATION_OF_RAS_IN_B_CELLS	5	0.389521	0.657095	0.890244	0.997165	1
REACTOME_DIGESTION_OF_DIETARY_CARBOHYDRATE	5	0.383659	0.65132	0.872951	0.999276	1
REACTOME_DNA_DAMAGE_TELOMERE_STRESS_INDUCED_SENESCENCE	27	0.25463	0.648945	0.955882	0.999216	1
REACTOME_NCAM1_INTERACTIONS	36	0.234435	0.643662	0.980435	1	1
REACTOME_ETHANOL_OXIDATION	11	0.307555	0.642362	0.897959	1	1
REACTOME_E2F_ENABLED_INHIBITION_OF_PRE_REPLICATION_COMPLEX_FORMATION	9	0.321482	0.640051	0.888211	0.999733	1
REACTOME_SHC_MEDIATED_CASCADE_FGFR4	13	0.294668	0.637471	0.917548	0.999698	1
REACTOME_MITOCHONDRIAL_FATTY_ACID_BETA_OXIDATION_OF_UNSATURATED_FATTY_ACIDS	6	0.356055	0.635281	0.88535	0.99931	1
REACTOME_GABA_RECEPTOR_ACTIVATION	47	0.219199	0.632123	0.995349	0.999487	1
REACTOME_FORMATION_OF_FIBRIN_CLOT_CLOTTING_CASCADE	29	0.240479	0.626257	0.987705	1	1
REACTOME_CITRIC_ACID_CYCLE_TCA_CYCLE	22	0.251201	0.616117	0.959276	1	1
REACTOME_SODIUM_PROTON_EXCHANGERS	8	0.314347	0.605679	0.926625	1	1
REACTOME_FORMYL_PEPTIDE_RECEPTORS_BIND_FORMYL_PEPTIDES_AND_MANY_OTHER_LIGANDS	7	0.323122	0.594434	0.923379	1	1
REACTOME_DISEASES_ASSOCIATED_WITH_SURFACTANT_METABOLISM	6	0.332577	0.591102	0.924242	1	1
REACTOME_CRMPS_IN_SEMA3A_SIGNALING	16	0.254044	0.583325	0.954545	1	1
REACTOME_BETA_OXIDATION_OF_VERY_LONG_CHAIN_FATTY_ACIDS	11	0.27982	0.583052	0.945032	1	1
REACTOME_INTERACTIONS_OF_VPR_WITH_HOST_CELLULAR_PROTEINS	36	0.210626	0.580243	0.99115	1	1
REACTOME_ANDROGEN_BIOSYNTHESIS	6	0.318909	0.56753	0.912351	1	1
REACTOME_MASTL_FACILITATES_MITOTIC_PROGRESSION	10	0.277095	0.567142	0.951374	1	1
REACTOME_SYNTHESIS_OF_KETONE_BODIES	8	0.294206	0.565994	0.94831	1	1
REACTOME_TRAFFICKING_OF_GLUR2_CONTAINING_AMPA_RECEPTORS	16	0.247816	0.562063	0.96748	1	1
REACTOME_INTRINSIC_PATHWAY_OF_FIBRIN_CLOT_FORMATION	19	0.235808	0.56146	0.987288	1	1
REACTOME_ACTIVATED_NTRK2_SIGNALS_THROUGH_RAS	8	0.294485	0.560391	0.943798	1	1
REACTOME_ORGANIC_ANION_TRANSPORTERS	7	0.297991	0.555373	0.95501	1	1
REACTOME_KETONE_BODY_METABOLISM	9	0.277062	0.554845	0.957173	1	1
REACTOME_NUCLEAR_IMPORT_OF_REV_PROTEIN	33	0.208328	0.549825	0.995413	1	1
REACTOME_DECTIN_2_FAMILY	22	0.218275	0.545564	0.98954	1	1
REACTOME_HUR_ELAVL1_BINDS_AND_STABILIZES_MRNA	8	0.278915	0.541491	0.978355	1	1
REACTOME_GLYCEROPHOSPHOLIPID_CATABOLISM	7	0.282406	0.536716	0.969388	1	1
REACTOME_IRAK4_DEFICIENCY_TLR2_4	9	0.267668	0.536301	0.965164	1	1
REACTOME_ACTIVATION_OF_MATRIX_METALLOPROTEINASES	17	0.231432	0.533714	0.987552	1	1
REACTOME_COLLAGEN_BIOSYNTHESIS_AND_MODIFYING_ENZYMES	61	0.175732	0.520478	1	1	1
REACTOME_SYNTHESIS_OF_DIPHTHAMIDE_EEF2	8	0.27065	0.51326	0.960076	1	1
REACTOME_ABACAVIR_TRANSPORT_AND_METABOLISM	10	0.252845	0.511311	0.976285	1	1
REACTOME_VOLTAGE_GATED_POTASSIUM_CHANNELS	25	0.198586	0.503927	1	1	1
REACTOME_NTRK2_ACTIVATES_RAC1	5	0.28117	0.48713	0.985743	1	1
REACTOME_ENDOSOMAL_VACUOLAR_PATHWAY	11	0.220076	0.456812	0.995943	1	1
REACTOME_LYSINE_CATABOLISM	11	0.218056	0.45124	0.99187	1	1
REACTOME_PD_1_SIGNALING	8	0.218741	0.420677	0.998088	1	1
REACTOME_ERYTHROCYTES_TAKE_UP_CARBON_DIOXIDE_AND_RELEASE_OXYGEN	9	0.207001	0.416874	0.993776	1	1
REACTOME_SCAVENGING_BY_CLASS_B_RECEPTORS	6	0.229255	0.413387	0.996094	1	1
REACTOME_HDL_CLEARANCE	5	0.242621	0.411136	0.996071	1	1
REACTOME_DEFECTIVE_GALNT3_CAUSES_FAMILIAL_HYPERPHOSPHATEMIC_TUMORAL_CALCINOSIS_HFTC	14	0.180943	0.398394	1	0.999196	1

## Sheet: Positive enrichmen
NAME	SIZE	ES	NES	NOM p-val	FDR q-val	FWER p-val
REACTOME_CIRCADIAN_CLOCK	69	-0.698765	-2.08448	0	0.00108005	0.001
REACTOME_SYNTHESIS_OF_PIPS_AT_THE_PLASMA_MEMBRANE	51	-0.700894	-1.9599	0	0.00579613	0.011
REACTOME_MYOGENESIS	25	-0.775891	-1.94014	0	0.00770602	0.022
REACTOME_NETRIN_1_SIGNALING	45	-0.707982	-1.93958	0	0.00577952	0.022
REACTOME_RESPONSE_OF_EIF2AK1_HRI_TO_HEME_DEFICIENCY	15	-0.869958	-1.90777	0	0.0102465	0.048
REACTOME_BMAL1_CLOCK_NPAS2_ACTIVATES_CIRCADIAN_GENE_EXPRESSION	27	-0.752419	-1.87967	0	0.0168682	0.09
REACTOME_FOXO_MEDIATED_TRANSCRIPTION_OF_CELL_DEATH_GENES	15	-0.839814	-1.87422	0	0.0153544	0.096
REACTOME_RAB_REGULATION_OF_TRAFFICKING	115	-0.578594	-1.86859	0	0.0144738	0.101
REACTOME_RHO_GTPASE_CYCLE	127	-0.570604	-1.86682	0	0.0132095	0.104
REACTOME_PI_METABOLISM	80	-0.612117	-1.85706	0	0.0139716	0.121
REACTOME_CHROMATIN_MODIFYING_ENZYMES	199	-0.535675	-1.83896	0	0.0191399	0.174
REACTOME_CELL_CELL_COMMUNICATION	109	-0.567318	-1.81279	0	0.028231	0.267
REACTOME_SIGNALING_BY_PDGF	56	-0.615887	-1.80509	0.003663	0.0306399	0.305
REACTOME_DCC_MEDIATED_ATTRACTIVE_SIGNALING	14	-0.8309	-1.80417	0	0.0290424	0.31
REACTOME_HDMS_DEMETHYLATE_HISTONES	22	-0.743409	-1.77784	0.00389864	0.041958	0.44
REACTOME_NRAGE_SIGNALS_DEATH_THROUGH_JNK	54	-0.628204	-1.77613	0.00191571	0.0411483	0.456
REACTOME_DEATH_RECEPTOR_SIGNALLING	132	-0.548436	-1.77547	0	0.0393408	0.463
REACTOME_PHOSPHOLIPID_METABOLISM	186	-0.522484	-1.7676	0	0.0422707	0.509
REACTOME_INTRA_GOLGI_TRAFFIC	41	-0.657656	-1.76231	0.00378788	0.043875	0.547
REACTOME_DOWNSTREAM_SIGNAL_TRANSDUCTION	29	-0.695194	-1.75352	0.00359712	0.0488306	0.601
REACTOME_RAB_GEFS_EXCHANGE_GTP_FOR_GDP_ON_RABS	85	-0.560653	-1.73955	0	0.0587114	0.69
REACTOME_INTERLEUKIN_2_FAMILY_SIGNALING	31	-0.657032	-1.73127	0.00186916	0.0636791	0.74
REACTOME_NEGATIVE_REGULATION_OF_THE_PI3K_AKT_NETWORK	95	-0.545729	-1.71848	0	0.073704	0.809
REACTOME_NEPHRIN_FAMILY_INTERACTIONS	19	-0.741893	-1.71295	0.00396825	0.0768136	0.834
REACTOME_FOXO_MEDIATED_TRANSCRIPTION	56	-0.601144	-1.70872	0.0018315	0.079269	0.854
REACTOME_REGULATION_OF_BETA_CELL_DEVELOPMENT	33	-0.647679	-1.70599	0.0109091	0.0791913	0.864
REACTOME_PARASITE_INFECTION	54	-0.597671	-1.70263	0	0.0808129	0.876
REACTOME_SIGNALING_BY_TGF_BETA_FAMILY_MEMBERS	96	-0.541621	-1.70239	0	0.0782226	0.878
REACTOME_SIGNALING_BY_TGF_BETA_RECEPTOR_COMPLEX	70	-0.569791	-1.70023	0	0.0780335	0.892
REACTOME_TBC_RABGAPS	42	-0.62864	-1.7001	0.0018622	0.0755329	0.893
REACTOME_NUCLEAR_RECEPTOR_TRANSCRIPTION_PATHWAY	48	-0.605053	-1.69732	0	0.0762535	0.905
REACTOME_PEPTIDE_HORMONE_BIOSYNTHESIS	7	-0.917991	-1.69415	0	0.0768668	0.914
REACTOME_SUMOYLATION_OF_TRANSCRIPTION_COFACTORS	43	-0.618454	-1.69183	0.00537634	0.0769926	0.918
REACTOME_P75_NTR_RECEPTOR_MEDIATED_SIGNALLING	90	-0.53977	-1.68001	0	0.0893294	0.949
REACTOME_FOXO_MEDIATED_TRANSCRIPTION_OF_CELL_CYCLE_GENES	16	-0.739127	-1.67131	0.00373134	0.0973341	0.969
REACTOME_CELL_JUNCTION_ORGANIZATION	80	-0.547507	-1.66471	0	0.104342	0.978
REACTOME_ADHERENS_JUNCTIONS_INTERACTIONS	32	-0.639805	-1.66405	0.00187617	0.102388	0.978
REACTOME_SIGNALING_BY_SCF_KIT	41	-0.612149	-1.66064	0.00554529	0.10459	0.984
REACTOME_RESPONSE_TO_METAL_IONS	12	-0.791605	-1.65254	0.00927644	0.114053	0.989
REACTOME_HATS_ACETYLATE_HISTONES	79	-0.548324	-1.65072	0	0.113692	0.99
REACTOME_ORGANIC_CATION_ANION_ZWITTERION_TRANSPORT	12	-0.795835	-1.65059	0.00560748	0.1111	0.99
REACTOME_SUMOYLATION_OF_INTRACELLULAR_RECEPTORS	30	-0.643836	-1.65044	0.00746269	0.108679	0.99
REACTOME_SIGNALING_BY_MET	75	-0.544106	-1.64615	0.00179211	0.112298	0.992
REACTOME_MITOTIC_TELOPHASE_CYTOKINESIS	13	-0.775787	-1.64427	0.0132075	0.1128	0.993
REACTOME_FCGAMMA_RECEPTOR_FCGR_DEPENDENT_PHAGOCYTOSIS	79	-0.533788	-1.64249	0.00365631	0.11279	0.993
REACTOME_COHESIN_LOADING_ONTO_CHROMATIN	10	-0.799274	-1.64193	0.012024	0.111111	0.993
REACTOME_METALLOTHIONEINS_BIND_METALS	10	-0.816175	-1.64132	0.00956023	0.109635	0.993
REACTOME_SYNTHESIS_OF_PIPS_AT_THE_EARLY_ENDOSOME_MEMBRANE	16	-0.707859	-1.62623	0.0181488	0.130314	0.996
REACTOME_SIGNALING_BY_VEGF	102	-0.517168	-1.62095	0.00338409	0.136443	0.999
REACTOME_EPH_EPHRIN_MEDIATED_REPULSION_OF_CELLS	44	-0.587722	-1.61881	0.00732601	0.137067	0.999
REACTOME_SIGNALING_BY_BMP	26	-0.651449	-1.61344	0.00929368	0.1441	1
REACTOME_INTERLEUKIN_15_SIGNALING	13	-0.732826	-1.60728	0.0119048	0.153318	1
REACTOME_MET_PROMOTES_CELL_MOTILITY	37	-0.607309	-1.60677	0.005386	0.151397	1
REACTOME_GAB1_SIGNALOSOME	17	-0.712336	-1.6065	0.0212766	0.149036	1
REACTOME_PI_3K_CASCADE_FGFR3	12	-0.759375	-1.60055	0.0120482	0.157159	1
REACTOME_INTERLEUKIN_37_SIGNALING	19	-0.684942	-1.59903	0.0113208	0.156723	1
REACTOME_TRANSPORT_OF_INORGANIC_CATIONS_ANIONS_AND_AMINO_ACIDS_OLIGOPEPTIDES	94	-0.509811	-1.59872	0	0.154503	1
REACTOME_SIGNALING_BY_HIPPO	20	-0.672462	-1.59818	0.00580271	0.152794	1
REACTOME_SIGNALING_BY_NODAL	15	-0.724961	-1.59639	0.0133588	0.153289	1
REACTOME_PKMTS_METHYLATE_HISTONE_LYSINES	43	-0.586352	-1.59278	0.00545455	0.157139	1
REACTOME_PI3K_EVENTS_IN_ERBB2_SIGNALING	16	-0.688096	-1.59181	0.0210728	0.156254	1
REACTOME_AMINO_ACIDS_REGULATE_MTORC1	50	-0.562089	-1.58979	0.014733	0.157205	1
REACTOME_TRANSCRIPTIONAL_ACTIVATION_OF_MITOCHONDRIAL_BIOGENESIS	54	-0.559498	-1.58926	0.016791	0.155684	1
REACTOME_TFAP2_AP_2_FAMILY_REGULATES_TRANSCRIPTION_OF_GROWTH_FACTORS_AND_THEIR_RECEPTORS	11	-0.760161	-1.58509	0.0294737	0.160962	1
REACTOME_AMINO_ACID_TRANSPORT_ACROSS_THE_PLASMA_MEMBRANE	30	-0.625709	-1.58269	0.0184162	0.162779	1
REACTOME_NON_INTEGRIN_MEMBRANE_ECM_INTERACTIONS	54	-0.547607	-1.58192	0.00542496	0.161746	1
REACTOME_RUNX3_REGULATES_NOTCH_SIGNALING	13	-0.730898	-1.58098	0.0226843	0.160952	1
REACTOME_REGULATION_OF_IFNG_SIGNALING	14	-0.733904	-1.57829	0.015534	0.163726	1
REACTOME_ACTIVATION_OF_RAC1	13	-0.733351	-1.57747	0.0242424	0.162919	1
REACTOME_CELL_DEATH_SIGNALLING_VIA_NRAGE_NRIF_AND_NADE	71	-0.528646	-1.57719	0.00189753	0.160873	1
REACTOME_INTERLEUKIN_4_AND_INTERLEUKIN_13_SIGNALING	77	-0.515264	-1.57694	0.0035524	0.159003	1
REACTOME_IKBA_VARIANT_LEADS_TO_EDA_ID	7	-0.822489	-1.57548	0.0230326	0.159481	1
REACTOME_NETRIN_MEDIATED_REPULSION_SIGNALS	7	-0.834484	-1.57484	0.0224949	0.158232	1
REACTOME_SIGNALING_BY_RECEPTOR_TYROSINE_KINASES	453	-0.429402	-1.57438	0	0.157089	1
REACTOME_IRS_MEDIATED_SIGNALLING	37	-0.596587	-1.57098	0.0147601	0.160862	1
REACTOME_PI3K_AKT_SIGNALING_IN_CANCER	89	-0.505506	-1.57093	0.00173611	0.158854	1
REACTOME_STAT5_ACTIVATION	6	-0.878626	-1.57085	0.0100604	0.157021	1
REACTOME_CELL_EXTRACELLULAR_MATRIX_INTERACTIONS	18	-0.696903	-1.57006	0.0212355	0.156433	1
REACTOME_REGULATION_OF_GENE_EXPRESSION_IN_LATE_STAGE_BRANCHING_MORPHOGENESIS_PANCREATIC_BUD_PRECURSOR_CELLS	13	-0.725391	-1.56917	0.0206186	0.156116	1
REACTOME_GROWTH_HORMONE_RECEPTOR_SIGNALING	20	-0.663745	-1.5688	0.0333333	0.154751	1
REACTOME_APOPTOTIC_CLEAVAGE_OF_CELL_ADHESION_PROTEINS	10	-0.797615	-1.56285	0.0177165	0.162832	1
REACTOME_INTERLEUKIN_20_FAMILY_SIGNALING	19	-0.677176	-1.55639	0.0304183	0.17154	1
REACTOME_CD163_MEDIATING_AN_ANTI_INFLAMMATORY_RESPONSE	7	-0.840795	-1.55573	0.0203666	0.1708	1
REACTOME_ORGANIC_CATION_TRANSPORT	8	-0.794546	-1.55451	0.0199203	0.170587	1
REACTOME_INTERLEUKIN_6_FAMILY_SIGNALING	18	-0.680185	-1.55176	0.0189036	0.173391	1
REACTOME_G_ALPHA_12_13_SIGNALLING_EVENTS	69	-0.518812	-1.5513	0.00352113	0.172391	1
REACTOME_SIGNAL_AMPLIFICATION	26	-0.624697	-1.54807	0.0255403	0.17574	1
REACTOME_INTERLEUKIN_RECEPTOR_SHC_SIGNALING	20	-0.658959	-1.54657	0.0331492	0.176492	1
REACTOME_SIGNALING_BY_TYPE_1_INSULIN_LIKE_GROWTH_FACTOR_1_RECEPTOR_IGF1R	42	-0.561343	-1.54578	0.0107914	0.175889	1
REACTOME_SYNTHESIS_OF_PIPS_AT_THE_GOLGI_MEMBRANE	17	-0.666894	-1.54506	0.0318725	0.175148	1
REACTOME_NOTCH3_INTRACELLULAR_DOMAIN_REGULATES_TRANSCRIPTION	20	-0.658832	-1.54383	0.021978	0.175316	1
REACTOME_INTERACTION_BETWEEN_L1_AND_ANKYRINS	29	-0.603386	-1.54341	0.0168539	0.174043	1
REACTOME_SIGNALING_BY_ERYTHROPOIETIN	25	-0.632152	-1.54284	0.0400802	0.1733	1
REACTOME_INTERLEUKIN_9_SIGNALING	7	-0.803047	-1.54079	0.0386965	0.175215	1
REACTOME_SIGNALING_BY_INSULIN_RECEPTOR	61	-0.526899	-1.53761	0.00883392	0.178703	1
REACTOME_SYNTHESIS_OF_PIPS_AT_THE_LATE_ENDOSOME_MEMBRANE	11	-0.735286	-1.53498	0.0504854	0.181627	1
REACTOME_INSULIN_RECEPTOR_SIGNALLING_CASCADE	42	-0.571153	-1.53481	0.0277264	0.180159	1
REACTOME_RUNX1_INTERACTS_WITH_CO_FACTORS_WHOSE_PRECISE_EFFECT_ON_RUNX1_TARGETS_IS_NOT_KNOWN	36	-0.57223	-1.53317	0.027451	0.181241	1
REACTOME_ROLE_OF_PHOSPHOLIPIDS_IN_PHAGOCYTOSIS	21	-0.643183	-1.53213	0.0372439	0.181261	1
REACTOME_BH3_ONLY_PROTEINS_ASSOCIATE_WITH_AND_INACTIVATE_ANTI_APOPTOTIC_BCL_2_MEMBERS	9	-0.779894	-1.53101	0.026	0.181754	1
REACTOME_INTERLEUKIN_6_SIGNALING	10	-0.772756	-1.53028	0.0335968	0.181151	1
REACTOME_XENOBIOTICS	15	-0.694575	-1.52657	0.051756	0.185844	1
REACTOME_CASPASE_ACTIVATION_VIA_DEPENDENCE_RECEPTORS_IN_THE_ABSENCE_OF_LIGAND	10	-0.755994	-1.52495	0.0338346	0.186783	1
REACTOME_REGULATION_OF_LIPID_METABOLISM_BY_PPARALPHA	118	-0.47313	-1.52465	0	0.185539	1
REACTOME_PASSIVE_TRANSPORT_BY_AQUAPORINS	10	-0.774166	-1.52463	0.0294695	0.183801	1
REACTOME_INTERLEUKIN_21_SIGNALING	9	-0.771569	-1.52283	0.0390947	0.18525	1
REACTOME_AKT_PHOSPHORYLATES_TARGETS_IN_THE_NUCLEUS	9	-0.782081	-1.52218	0.0325048	0.184612	1
REACTOME_ACTIVATED_NTRK3_SIGNALS_THROUGH_PI3K	5	-0.885848	-1.52031	0.0179283	0.186116	1
REACTOME_CONSTITUTIVE_SIGNALING_BY_ABERRANT_PI3K_IN_CANCER	63	-0.522734	-1.51915	0.0139373	0.186603	1
REACTOME_TRANSCRIPTIONAL_ACTIVITY_OF_SMAD2_SMAD3_SMAD4_HETEROTRIMER	43	-0.548506	-1.5167	0.0146252	0.189013	1
REACTOME_SLC_MEDIATED_TRANSMEMBRANE_TRANSPORT	216	-0.432412	-1.51168	0	0.196246	1
REACTOME_INTERLEUKIN_1_PROCESSING	6	-0.844234	-1.51032	0.0240964	0.196852	1
REACTOME_SIGNALING_BY_LEPTIN	10	-0.74827	-1.50764	0.0416667	0.199666	1
REACTOME_ERYTHROPOIETIN_ACTIVATES_PHOSPHOINOSITIDE_3_KINASE_PI3K	12	-0.722689	-1.50567	0.0420842	0.201558	1
REACTOME_ASPARTATE_AND_ASPARAGINE_METABOLISM	10	-0.7455	-1.50428	0.0300601	0.202538	1
REACTOME_RORA_ACTIVATES_GENE_EXPRESSION	18	-0.677042	-1.50295	0.028	0.203222	1
REACTOME_ATF4_ACTIVATES_GENES_IN_RESPONSE_TO_ENDOPLASMIC_RETICULUM_STRESS	26	-0.605885	-1.50158	0.0329068	0.203926	1
REACTOME_INTERLEUKIN_3_INTERLEUKIN_5_AND_GM_CSF_SIGNALING	39	-0.556717	-1.4976	0.0355805	0.209359	1
REACTOME_RHO_GTPASES_ACTIVATE_WASPS_AND_WAVES	34	-0.572486	-1.49699	0.0333952	0.208843	1
REACTOME_YAP1_AND_WWTR1_TAZ_STIMULATED_GENE_EXPRESSION	12	-0.692727	-1.49546	0.0429688	0.209926	1
REACTOME_NGF_STIMULATED_TRANSCRIPTION	34	-0.565015	-1.49452	0.0271318	0.209891	1
REACTOME_DEADENYLATION_OF_MRNA	25	-0.600804	-1.49256	0.0477032	0.211839	1
REACTOME_FGFR3_LIGAND_BINDING_AND_ACTIVATION	6	-0.837797	-1.49244	0.038	0.210329	1
REACTOME_PHYSIOLOGICAL_FACTORS	9	-0.754133	-1.49211	0.0547945	0.209311	1
REACTOME_REGULATION_OF_IFNA_SIGNALING	12	-0.716613	-1.49194	0.0478927	0.207933	1
REACTOME_GENERATION_OF_SECOND_MESSENGER_MOLECULES	17	-0.658699	-1.49164	0.0492126	0.206893	1
REACTOME_WNT_MEDIATED_ACTIVATION_OF_DVL	8	-0.787504	-1.48888	0.0540541	0.210381	1
REACTOME_SIGNALING_BY_PDGFR_IN_DISEASE	20	-0.636231	-1.48751	0.0469043	0.2113	1
REACTOME_RETROGRADE_TRANSPORT_AT_THE_TRANS_GOLGI_NETWORK	49	-0.53132	-1.48618	0.0353357	0.212248	1
REACTOME_ROLE_OF_LAT2_NTAL_LAB_ON_CALCIUM_MOBILIZATION	17	-0.650834	-1.48369	0.0531309	0.215119	1
REACTOME_INTERFERON_GAMMA_SIGNALING	74	-0.487383	-1.4826	0.0108893	0.215664	1
REACTOME_TRANSPORT_OF_BILE_SALTS_AND_ORGANIC_ACIDS_METAL_IONS_AND_AMINE_COMPOUNDS	72	-0.488229	-1.48156	0.0214286	0.216001	1
REACTOME_ACTIVATION_OF_THE_AP_1_FAMILY_OF_TRANSCRIPTION_FACTORS	10	-0.748253	-1.48155	0.044898	0.214399	1
REACTOME_SUMOYLATION_OF_DNA_METHYLATION_PROTEINS	16	-0.648795	-1.48014	0.0451866	0.215287	1
REACTOME_PRE_NOTCH_EXPRESSION_AND_PROCESSING	49	-0.535119	-1.47973	0.0326679	0.214415	1
REACTOME_PERK_REGULATES_GENE_EXPRESSION	31	-0.568686	-1.47666	0.0359848	0.218589	1
REACTOME_SIGNALING_BY_NTRKS	122	-0.459847	-1.47607	0.00729927	0.217974	1
REACTOME_RET_SIGNALING	35	-0.551428	-1.47357	0.0469043	0.221404	1
REACTOME_CATION_COUPLED_CHLORIDE_COTRANSPORTERS	7	-0.794782	-1.47223	0.0492126	0.222276	1
REACTOME_PI3K_AKT_ACTIVATION	7	-0.794785	-1.46983	0.0562852	0.225132	1
REACTOME_TNF_RECEPTOR_SUPERFAMILY_TNFSF_MEMBERS_MEDIATING_NON_CANONICAL_NF_KB_PATHWAY	11	-0.706751	-1.46939	0.0588235	0.224474	1
REACTOME_FOXO_MEDIATED_TRANSCRIPTION_OF_OXIDATIVE_STRESS_METABOLIC_AND_NEURONAL_GENES	22	-0.607582	-1.46772	0.0474308	0.225902	1
REACTOME_P130CAS_LINKAGE_TO_MAPK_SIGNALING_FOR_INTEGRINS	14	-0.657883	-1.46693	0.0700758	0.22586	1
REACTOME_TNFR1_INDUCED_NFKAPPAB_SIGNALING_PATHWAY	30	-0.566793	-1.46587	0.0396226	0.226315	1
REACTOME_INTERLEUKIN_2_SIGNALING	9	-0.754813	-1.46359	0.0528376	0.228922	1
REACTOME_MET_ACTIVATES_RAP1_AND_RAC1	10	-0.726406	-1.46356	0.0602637	0.227418	1
REACTOME_RAF_INDEPENDENT_MAPK1_3_ACTIVATION	21	-0.609063	-1.46277	0.0501002	0.22749	1
REACTOME_SERINE_BIOSYNTHESIS	8	-0.779247	-1.4625	0.0487805	0.226579	1
REACTOME_INTESTINAL_ABSORPTION	5	-0.851638	-1.46062	0.0508475	0.228748	1
REACTOME_SEMA4D_MEDIATED_INHIBITION_OF_CELL_ATTACHMENT_AND_MIGRATION	8	-0.769221	-1.45869	0.0509434	0.230602	1
REACTOME_BINDING_OF_TCF_LEF_CTNNB1_TO_TARGET_GENE_PROMOTERS	8	-0.768068	-1.45853	0.0674603	0.229281	1
REACTOME_RUNX3_REGULATES_BCL2L11_BIM_TRANSCRIPTION	5	-0.87222	-1.4566	0.0357853	0.231357	1
REACTOME_EPH_EPHRIN_SIGNALING	85	-0.467503	-1.44957	0.0174216	0.242957	1
REACTOME_GRB2_SOS_PROVIDES_LINKAGE_TO_MAPK_SIGNALING_FOR_INTEGRINS	14	-0.682919	-1.44923	0.0615385	0.242118	1
REACTOME_REGULATION_OF_GENE_EXPRESSION_BY_HYPOXIA_INDUCIBLE_FACTOR	10	-0.702831	-1.44829	0.0793651	0.242325	1
REACTOME_ACTIVATION_OF_BH3_ONLY_PROTEINS	29	-0.57036	-1.44669	0.0508167	0.243964	1
REACTOME_DOWNSTREAM_SIGNALING_OF_ACTIVATED_FGFR3	19	-0.622402	-1.44592	0.0606061	0.24381	1
REACTOME_ESTROGEN_DEPENDENT_NUCLEAR_EVENTS_DOWNSTREAM_OF_ESR_MEMBRANE_SIGNALING	24	-0.591609	-1.44341	0.0549451	0.247163	1
REACTOME_SODIUM_COUPLED_PHOSPHATE_COTRANSPORTERS	5	-0.838902	-1.44296	0.0610236	0.246483	1
REACTOME_LEISHMANIA_INFECTION	168	-0.433692	-1.44182	0.00859107	0.247119	1
REACTOME_TRANSCRIPTIONAL_REGULATION_OF_GRANULOPOIESIS	27	-0.580518	-1.44015	0.0449219	0.248765	1
REACTOME_SIGNALING_BY_ERBB2_IN_CANCER	26	-0.58049	-1.43665	0.0577281	0.254035	1
REACTOME_EFFECTS_OF_PIP2_HYDROLYSIS	25	-0.583062	-1.43389	0.0538922	0.257652	1
REACTOME_DOWNREGULATION_OF_TGF_BETA_RECEPTOR_SIGNALING	24	-0.581328	-1.43347	0.0662983	0.256875	1
REACTOME_TGF_BETA_RECEPTOR_SIGNALING_ACTIVATES_SMADS	30	-0.563766	-1.43341	0.0550098	0.255432	1
REACTOME_CREB3_FACTORS_ACTIVATE_GENES	8	-0.74453	-1.4327	0.0878243	0.255365	1
REACTOME_NOTCH4_INTRACELLULAR_DOMAIN_REGULATES_TRANSCRIPTION	17	-0.635701	-1.43163	0.0651341	0.255668	1
REACTOME_ACTIVATION_OF_PUMA_AND_TRANSLOCATION_TO_MITOCHONDRIA	8	-0.752491	-1.43133	0.0836576	0.254761	1
REACTOME_MET_ACTIVATES_PI3K_AKT_SIGNALING	5	-0.829386	-1.42981	0.0558882	0.256145	1
REACTOME_PRE_NOTCH_PROCESSING_IN_GOLGI	18	-0.618966	-1.42836	0.0796813	0.257305	1
REACTOME_NEGATIVE_REGULATION_OF_TCF_DEPENDENT_SIGNALING_BY_DVL_INTERACTING_PROTEINS	5	-0.834588	-1.42617	0.0764588	0.260306	1
REACTOME_OTHER_INTERLEUKIN_SIGNALING	21	-0.599699	-1.42556	0.0731225	0.260015	1
REACTOME_EPHA_MEDIATED_GROWTH_CONE_COLLAPSE	27	-0.571407	-1.42539	0.05	0.25885	1
REACTOME_SIRT1_NEGATIVELY_REGULATES_RRNA_EXPRESSION	8	-0.743449	-1.42391	0.0827068	0.260203	1
REACTOME_CELL_CELL_JUNCTION_ORGANIZATION	57	-0.492919	-1.42261	0.029877	0.26128	1
REACTOME_NOTCH_HLH_TRANSCRIPTION_PATHWAY	27	-0.56228	-1.41875	0.0656934	0.26692	1
REACTOME_CLATHRIN_MEDIATED_ENDOCYTOSIS	137	-0.434726	-1.41751	0.0120898	0.267842	1
REACTOME_MAPK3_ERK1_ACTIVATION	9	-0.728942	-1.41692	0.102857	0.267486	1
REACTOME_SIGNALING_BY_EGFR	50	-0.496145	-1.41508	0.0414313	0.269572	1
REACTOME_DOWNREGULATION_OF_SMAD2_3_SMAD4_TRANSCRIPTIONAL_ACTIVITY	23	-0.573459	-1.41493	0.0575816	0.268462	1
REACTOME_EGFR_INTERACTS_WITH_PHOSPHOLIPASE_C_GAMMA	9	-0.726092	-1.4147	0.0849802	0.267341	1
REACTOME_MAPK1_ERK2_ACTIVATION	8	-0.750705	-1.4141	0.0677291	0.267065	1
REACTOME_FORMATION_OF_THE_BETA_CATENIN_TCF_TRANSACTIVATING_COMPLEX	31	-0.556966	-1.4139	0.0614203	0.266032	1
REACTOME_INTERLEUKIN_7_SIGNALING	20	-0.611121	-1.4133	0.086785	0.265744	1
REACTOME_SUMOYLATION	169	-0.425146	-1.41263	0.00859107	0.265802	1
REACTOME_SIGNALING_BY_FGFR1_IN_DISEASE	33	-0.539039	-1.41218	0.0526316	0.265202	1
REACTOME_REPRESSION_OF_WNT_TARGET_GENES	13	-0.658039	-1.40997	0.0817121	0.268047	1
REACTOME_ARACHIDONATE_PRODUCTION_FROM_DAG	5	-0.823472	-1.4096	0.0889749	0.26741	1
REACTOME_ACTIVATION_OF_C3_AND_C5	7	-0.779844	-1.40828	0.0770713	0.268682	1
REACTOME_NOTCH2_INTRACELLULAR_DOMAIN_REGULATES_TRANSCRIPTION	8	-0.730348	-1.40811	0.10625	0.267618	1
REACTOME_IL_6_TYPE_CYTOKINE_RECEPTOR_LIGAND_INTERACTIONS	12	-0.665609	-1.40498	0.0992063	0.272237	1
REACTOME_RECEPTOR_TYPE_TYROSINE_PROTEIN_PHOSPHATASES	14	-0.64714	-1.40261	0.0933333	0.275372	1
REACTOME_NOD1_2_SIGNALING_PATHWAY	36	-0.525958	-1.40257	0.0723562	0.274058	1
REACTOME_TNF_SIGNALING	42	-0.517032	-1.40168	0.0527307	0.274601	1
REACTOME_ACYL_CHAIN_REMODELING_OF_CL	6	-0.782771	-1.39977	0.104418	0.277171	1
REACTOME_DEUBIQUITINATION	231	-0.400348	-1.39962	0.00643087	0.276023	1
REACTOME_SIGNALING_BY_WNT_IN_CANCER	32	-0.540614	-1.39944	0.0631769	0.274965	1
REACTOME_VEGF_LIGAND_RECEPTOR_INTERACTIONS	7	-0.760041	-1.39838	0.0854369	0.275633	1
REACTOME_GLYCEROPHOSPHOLIPID_BIOSYNTHESIS	107	-0.443734	-1.39828	0.0268817	0.27452	1
REACTOME_HYDROLYSIS_OF_LPC	8	-0.73829	-1.39827	0.0983607	0.273168	1
REACTOME_SIGNALING_BY_NOTCH1_T_7_9_NOTCH1_M1580_K2555_TRANSLOCATION_MUTANT	6	-0.793979	-1.3967	0.079918	0.274727	1
REACTOME_FORMATION_OF_THE_CORNIFIED_ENVELOPE	55	-0.480093	-1.39591	0.0478723	0.274902	1
REACTOME_SYNTHESIS_OF_IP2_IP_AND_INS_IN_THE_CYTOSOL	14	-0.649792	-1.39551	0.0910973	0.274294	1
REACTOME_ACYL_CHAIN_REMODELING_OF_DAG_AND_TAG	5	-0.796262	-1.39394	0.0891089	0.276084	1
REACTOME_MET_ACTIVATES_PTK2_SIGNALING	26	-0.567609	-1.39038	0.0789981	0.281472	1
REACTOME_KERATINIZATION	62	-0.476644	-1.38851	0.0439367	0.283859	1
REACTOME_MECP2_REGULATES_TRANSCRIPTION_FACTORS	5	-0.825085	-1.38721	0.0659794	0.28486	1
REACTOME_TP53_REGULATES_TRANSCRIPTION_OF_SEVERAL_ADDITIONAL_CELL_DEATH_GENES_WHOSE_SPECIFIC_ROLES_IN_P53_DEPENDENT_APOPTOSIS_REMAIN_UNCERTAIN	13	-0.653932	-1.38506	0.0847458	0.287531	1
REACTOME_CALCITONIN_LIKE_LIGAND_RECEPTORS	7	-0.732727	-1.38505	0.134694	0.28618	1
REACTOME_PHOSPHORYLATION_SITE_MUTANTS_OF_CTNNB1_ARE_NOT_TARGETED_TO_THE_PROTEASOME_BY_THE_DESTRUCTION_COMPLEX	15	-0.61712	-1.37941	0.0877514	0.295702	1
REACTOME_LAMININ_INTERACTIONS	28	-0.552481	-1.37912	0.0695489	0.294869	1
REACTOME_REGULATION_OF_FOXO_TRANSCRIPTIONAL_ACTIVITY_BY_ACETYLATION	10	-0.698626	-1.375	0.120079	0.301985	1
REACTOME_TFAP2_AP_2_FAMILY_REGULATES_TRANSCRIPTION_OF_CELL_CYCLE_FACTORS	5	-0.792289	-1.3745	0.112811	0.301585	1
REACTOME_REGULATION_OF_KIT_SIGNALING	15	-0.615599	-1.37332	0.105042	0.302487	1
REACTOME_MISCELLANEOUS_TRANSPORT_AND_BINDING_EVENTS	22	-0.570602	-1.37292	0.0891841	0.30191	1
REACTOME_INTERLEUKIN_35_SIGNALLING	11	-0.668558	-1.37264	0.128655	0.301125	1
REACTOME_REGULATION_OF_PTEN_GENE_TRANSCRIPTION	60	-0.470316	-1.36848	0.0542907	0.307968	1
REACTOME_TP53_REGULATES_TRANSCRIPTION_OF_GENES_INVOLVED_IN_CYTOCHROME_C_RELEASE	18	-0.582345	-1.36795	0.0926276	0.307752	1
REACTOME_NUCLEOTIDE_BINDING_DOMAIN_LEUCINE_RICH_REPEAT_CONTAINING_RECEPTOR_NLR_SIGNALING_PATHWAYS	52	-0.484846	-1.36607	0.0604396	0.310057	1
REACTOME_DNA_DAMAGE_REVERSAL	8	-0.70462	-1.36491	0.123529	0.311045	1
REACTOME_COSTIMULATION_BY_THE_CD28_FAMILY	52	-0.480319	-1.36302	0.0615942	0.313567	1
REACTOME_DISASSEMBLY_OF_THE_DESTRUCTION_COMPLEX_AND_RECRUITMENT_OF_AXIN_TO_THE_MEMBRANE	27	-0.551029	-1.36145	0.0907441	0.315341	1
REACTOME_FATTY_ACIDS	9	-0.700588	-1.36137	0.106212	0.314091	1
REACTOME_ACTIVATION_OF_PPARGC1A_PGC_1ALPHA_BY_PHOSPHORYLATION	10	-0.700166	-1.36121	0.130952	0.313048	1
REACTOME_GRB7_EVENTS_IN_ERBB2_SIGNALING	5	-0.791051	-1.3606	0.137331	0.312879	1
REACTOME_SIGNALING_BY_RHO_GTPASES	368	-0.377106	-1.35906	0.0031348	0.31447	1
REACTOME_INTERLEUKIN_10_SIGNALING	27	-0.533868	-1.35853	0.107356	0.314165	1
REACTOME_FCERI_MEDIATED_MAPK_ACTIVATION	32	-0.52439	-1.35853	0.0892857	0.312791	1
REACTOME_SYNTHESIS_OF_IP3_AND_IP4_IN_THE_CYTOSOL	24	-0.55917	-1.35752	0.083045	0.313418	1
REACTOME_REGULATION_OF_TP53_ACTIVITY_THROUGH_ASSOCIATION_WITH_CO_FACTORS	12	-0.670451	-1.35693	0.118952	0.313185	1
REACTOME_RNF_MUTANTS_SHOW_ENHANCED_WNT_SIGNALING_AND_PROLIFERATION	7	-0.739029	-1.35315	0.126654	0.319863	1
REACTOME_UNFOLDED_PROTEIN_RESPONSE_UPR	89	-0.435277	-1.35163	0.0325342	0.321824	1
REACTOME_DEFECTIVE_EXT2_CAUSES_EXOSTOSES_2	14	-0.621828	-1.3509	0.116505	0.321783	1
REACTOME_SIGNALING_BY_ERBB2_ECD_MUTANTS	16	-0.605328	-1.34983	0.108987	0.322706	1
REACTOME_LOSS_OF_MECP2_BINDING_ABILITY_TO_THE_NCOR_SMRT_COMPLEX	7	-0.728621	-1.34881	0.11976	0.323264	1
REACTOME_APOPTOTIC_CLEAVAGE_OF_CELLULAR_PROTEINS	36	-0.516192	-1.34731	0.0655738	0.324916	1
REACTOME_INTEGRIN_SIGNALING	26	-0.549016	-1.34568	0.0889328	0.327083	1
REACTOME_SIGNALING_BY_FGFR3_FUSIONS_IN_CANCER	10	-0.661587	-1.34489	0.124521	0.327326	1
REACTOME_ONCOGENIC_MAPK_SIGNALING	68	-0.452157	-1.34441	0.0553506	0.326969	1
REACTOME_NRCAM_INTERACTIONS	7	-0.720079	-1.33974	0.141684	0.334943	1
REACTOME_SIGNALING_BY_MEMBRANE_TETHERED_FUSIONS_OF_PDGFRA_OR_PDGFRB	5	-0.782017	-1.33915	0.145129	0.334854	1
REACTOME_REELIN_SIGNALLING_PATHWAY	5	-0.802525	-1.33649	0.121704	0.338806	1
REACTOME_ACTIVATED_PKN1_STIMULATES_TRANSCRIPTION_OF_AR_ANDROGEN_RECEPTOR_REGULATED_GENES_KLK2_AND_KLK3	6	-0.751343	-1.33466	0.15087	0.341156	1
REACTOME_TNFR1_INDUCED_PROAPOPTOTIC_SIGNALING	13	-0.624681	-1.33069	0.125	0.347991	1
REACTOME_REGULATION_OF_SIGNALING_BY_NODAL	7	-0.713333	-1.33012	0.144289	0.347768	1
REACTOME_REGULATION_OF_GENE_EXPRESSION_IN_BETA_CELLS	18	-0.588414	-1.32991	0.129594	0.346813	1
REACTOME_RUNX3_REGULATES_CDKN1A_TRANSCRIPTION	6	-0.725796	-1.32933	0.16632	0.346534	1
REACTOME_INTRACELLULAR_SIGNALING_BY_SECOND_MESSENGERS	280	-0.373633	-1.32894	0.00656814	0.346013	1
REACTOME_RUNX1_AND_FOXP3_CONTROL_THE_DEVELOPMENT_OF_REGULATORY_T_LYMPHOCYTES_TREGS	5	-0.782252	-1.3281	0.141243	0.346396	1
REACTOME_ESR_MEDIATED_SIGNALING	153	-0.39923	-1.32695	0.0319328	0.347386	1
REACTOME_DISEASES_OF_SIGNAL_TRANSDUCTION_BY_GROWTH_FACTOR_RECEPTORS_AND_SECOND_MESSENGERS	347	-0.367793	-1.32681	0.00643087	0.346264	1
REACTOME_TYPE_I_HEMIDESMOSOME_ASSEMBLY	7	-0.727678	-1.32588	0.140496	0.346689	1
REACTOME_PI_3K_CASCADE_FGFR4	13	-0.624421	-1.32457	0.136187	0.347939	1
REACTOME_INTERLEUKIN_27_SIGNALING	10	-0.653026	-1.3193	0.152642	0.357551	1
REACTOME_UB_SPECIFIC_PROCESSING_PROTEASES	156	-0.396374	-1.31844	0.031614	0.357873	1
REACTOME_ION_CHANNEL_TRANSPORT	148	-0.396513	-1.31782	0.027972	0.35784	1
REACTOME_MET_RECEPTOR_ACTIVATION	5	-0.769322	-1.31782	0.136179	0.356447	1
REACTOME_TP53_REGULATES_TRANSCRIPTION_OF_DEATH_RECEPTORS_AND_LIGANDS	11	-0.643161	-1.31553	0.143137	0.359977	1
REACTOME_THROMBOXANE_SIGNALLING_THROUGH_TP_RECEPTOR	19	-0.555171	-1.31455	0.136015	0.360854	1
REACTOME_REGULATION_OF_CYTOSKELETAL_REMODELING_AND_CELL_SPREADING_BY_IPP_COMPLEX_COMPONENTS	8	-0.687821	-1.31312	0.160896	0.362456	1
REACTOME_VXPX_CARGO_TARGETING_TO_CILIUM	19	-0.564335	-1.31025	0.112994	0.366904	1
REACTOME_ENERGY_DEPENDENT_REGULATION_OF_MTOR_BY_LKB1_AMPK	29	-0.512129	-1.30997	0.128253	0.36607	1
REACTOME_REGULATED_PROTEOLYSIS_OF_P75NTR	11	-0.63788	-1.30926	0.148855	0.366182	1
REACTOME_CD28_CO_STIMULATION	32	-0.497865	-1.30796	0.114504	0.36766	1
REACTOME_EGR2_AND_SOX10_MEDIATED_INITIATION_OF_SCHWANN_CELL_MYELINATION	26	-0.51947	-1.30649	0.122776	0.369378	1
REACTOME_REGULATION_OF_TNFR1_SIGNALING	33	-0.506873	-1.305	0.101338	0.371006	1
REACTOME_ERBB2_ACTIVATES_PTK6_SIGNALING	12	-0.626903	-1.30413	0.159046	0.371659	1
REACTOME_PROTEIN_PROTEIN_INTERACTIONS_AT_SYNAPSES	76	-0.429548	-1.30226	0.084048	0.374329	1
REACTOME_INOSITOL_PHOSPHATE_METABOLISM	43	-0.478106	-1.30148	0.108007	0.374591	1
REACTOME_SIGNALING_BY_INTERLEUKINS	358	-0.358082	-1.30126	0.0126582	0.373635	1
REACTOME_SHC1_EVENTS_IN_ERBB2_SIGNALING	22	-0.540886	-1.2953	0.135496	0.384876	1
REACTOME_TRYPTOPHAN_CATABOLISM	11	-0.620318	-1.29284	0.162214	0.38876	1
REACTOME_CARGO_RECOGNITION_FOR_CLATHRIN_MEDIATED_ENDOCYTOSIS	98	-0.411655	-1.29258	0.0506108	0.38793	1
REACTOME_EICOSANOIDS	10	-0.631479	-1.29139	0.172023	0.389056	1
REACTOME_DOWNSTREAM_SIGNALING_OF_ACTIVATED_FGFR4	20	-0.550329	-1.29128	0.153704	0.387956	1
REACTOME_SMAD2_SMAD3_SMAD4_HETEROTRIMER_REGULATES_TRANSCRIPTION	31	-0.488455	-1.29022	0.12326	0.38879	1
REACTOME_ARYL_HYDROCARBON_RECEPTOR_SIGNALLING	7	-0.683617	-1.28892	0.1841	0.39029	1
REACTOME_PI3K_EVENTS_IN_ERBB4_SIGNALING	10	-0.638591	-1.28812	0.17603	0.390636	1
REACTOME_SIGNALING_BY_ERBB2	48	-0.46181	-1.28379	0.116152	0.398386	1
REACTOME_RESPONSE_OF_EIF2AK4_GCN2_TO_AMINO_ACID_DEFICIENCY	99	-0.409983	-1.2801	0.0690909	0.405325	1
REACTOME_GLI_PROTEINS_BIND_PROMOTERS_OF_HH_RESPONSIVE_GENES_TO_PROMOTE_TRANSCRIPTION	5	-0.747051	-1.27979	0.217391	0.404598	1
REACTOME_SUMOYLATION_OF_TRANSCRIPTION_FACTORS	18	-0.552978	-1.27898	0.157088	0.404875	1
REACTOME_APOPTOTIC_EXECUTION_PHASE	44	-0.462286	-1.27872	0.107807	0.404	1
REACTOME_FGFR1_MUTANT_RECEPTOR_ACTIVATION	26	-0.51639	-1.27693	0.159274	0.406344	1
REACTOME_ESTABLISHMENT_OF_SISTER_CHROMATID_COHESION	11	-0.625176	-1.27192	0.18677	0.415927	1
REACTOME_CA2_PATHWAY	56	-0.441489	-1.26999	0.110307	0.418787	1
REACTOME_SIGNALLING_TO_ERKS	32	-0.491267	-1.26978	0.143396	0.417773	1
REACTOME_LISTERIA_MONOCYTOGENES_ENTRY_INTO_HOST_CELLS	20	-0.533617	-1.26952	0.137255	0.416798	1
REACTOME_ESTROGEN_DEPENDENT_GENE_EXPRESSION	89	-0.40816	-1.26897	0.0882353	0.416698	1
REACTOME_ERYTHROPOIETIN_ACTIVATES_STAT5	7	-0.672347	-1.26816	0.192607	0.416975	1
REACTOME_NEUROTOXICITY_OF_CLOSTRIDIUM_TOXINS	9	-0.657248	-1.26786	0.208494	0.41634	1
REACTOME_TRANSCRIPTIONAL_REGULATION_OF_WHITE_ADIPOCYTE_DIFFERENTIATION	74	-0.422165	-1.26761	0.0985663	0.415471	1
REACTOME_SIGNALING_BY_ACTIVIN	12	-0.594859	-1.26706	0.196532	0.415299	1
REACTOME_KILLING_MECHANISMS	11	-0.617108	-1.2663	0.208494	0.415658	1
REACTOME_NR1H3_NR1H2_REGULATE_GENE_EXPRESSION_LINKED_TO_CHOLESTEROL_TRANSPORT_AND_EFFLUX	36	-0.476964	-1.26599	0.137546	0.414969	1
REACTOME_RUNX1_REGULATES_TRANSCRIPTION_OF_GENES_INVOLVED_IN_BCR_SIGNALING	5	-0.738744	-1.26567	0.200803	0.414303	1
REACTOME_ACTIVATED_NTRK2_SIGNALS_THROUGH_PI3K	6	-0.711295	-1.26513	0.226531	0.414121	1
REACTOME_ENDOGENOUS_STEROLS	21	-0.531579	-1.26492	0.167323	0.413143	1
REACTOME_TOLL_LIKE_RECEPTOR_TLR1_TLR2_CASCADE	91	-0.407751	-1.2647	0.0944056	0.412169	1
REACTOME_NOSTRIN_MEDIATED_ENOS_TRAFFICKING	5	-0.736218	-1.26437	0.194286	0.411523	1
REACTOME_INTRINSIC_PATHWAY_FOR_APOPTOSIS	50	-0.44746	-1.26359	0.125	0.411722	1
REACTOME_TRAF6_MEDIATED_NF_KB_ACTIVATION	22	-0.521499	-1.26334	0.16787	0.410948	1
REACTOME_DEFECTIVE_B4GALT1_CAUSES_B4GALT1_CDG_CDG_2D	7	-0.676042	-1.26285	0.213178	0.410742	1
REACTOME_NUCLEAR_EVENTS_KINASE_AND_TRANSCRIPTION_FACTOR_ACTIVATION	56	-0.431553	-1.26195	0.122083	0.411318	1
REACTOME_SIGNALING_BY_FGFR4_IN_DISEASE	11	-0.618637	-1.26085	0.202729	0.412462	1
REACTOME_PROLONGED_ERK_ACTIVATION_EVENTS	12	-0.596331	-1.26026	0.181637	0.412374	1
REACTOME_EPHRIN_SIGNALING	16	-0.570336	-1.2578	0.196154	0.416188	1
REACTOME_TOLL_LIKE_RECEPTOR_9_TLR9_CASCADE	90	-0.405604	-1.25728	0.0950704	0.415927	1
REACTOME_SYNTHESIS_OF_PIPS_AT_THE_ER_MEMBRANE	5	-0.733707	-1.25569	0.217221	0.418297	1
REACTOME_ROLE_OF_ABL_IN_ROBO_SLIT_SIGNALING	8	-0.65604	-1.2542	0.225191	0.420163	1
REACTOME_SIGNALING_BY_CYTOSOLIC_FGFR1_FUSION_MUTANTS	18	-0.545437	-1.25383	0.18677	0.419644	1
REACTOME_TP53_REGULATES_TRANSCRIPTION_OF_ADDITIONAL_CELL_CYCLE_GENES_WHOSE_EXACT_ROLE_IN_THE_P53_PATHWAY_REMAIN_UNCERTAIN	21	-0.52992	-1.25334	0.156604	0.419235	1
REACTOME_PECAM1_INTERACTIONS	11	-0.618451	-1.25289	0.191837	0.418953	1
REACTOME_FACTORS_INVOLVED_IN_MEGAKARYOCYTE_DEVELOPMENT_AND_PLATELET_PRODUCTION	129	-0.386393	-1.25127	0.0732143	0.420936	1
REACTOME_FCGR_ACTIVATION	8	-0.647742	-1.25076	0.247582	0.420681	1
REACTOME_RUNX1_REGULATES_ESTROGEN_RECEPTOR_MEDIATED_TRANSCRIPTION	6	-0.701306	-1.24859	0.219067	0.423853	1
REACTOME_SYNDECAN_INTERACTIONS	25	-0.506025	-1.24824	0.183884	0.423269	1
REACTOME_CYTOCHROME_P450_ARRANGED_BY_SUBSTRATE_TYPE	47	-0.452451	-1.24454	0.134875	0.430087	1
REACTOME_TRANSCRIPTIONAL_REGULATION_BY_THE_AP_2_TFAP2_FAMILY_OF_TRANSCRIPTION_FACTORS	32	-0.478697	-1.24227	0.163534	0.433951	1
REACTOME_FLT3_SIGNALING	231	-0.359999	-1.24106	0.0537815	0.435223	1
REACTOME_FRS_MEDIATED_FGFR3_SIGNALING	14	-0.567632	-1.24016	0.225191	0.435801	1
REACTOME_TRANSCRIPTIONAL_REGULATION_BY_RUNX1	157	-0.372417	-1.23997	0.0798046	0.434893	1
REACTOME_PI5P_REGULATES_TP53_ACETYLATION	9	-0.636999	-1.23872	0.217221	0.436097	1
REACTOME_RUNX1_REGULATES_TRANSCRIPTION_OF_GENES_INVOLVED_IN_DIFFERENTIATION_OF_MYELOID_CELLS	5	-0.72851	-1.23824	0.238372	0.43567	1
REACTOME_SYNTHESIS_OF_PG	8	-0.64584	-1.23633	0.215842	0.438266	1
REACTOME_SYNTHESIS_OF_EPOXY_EET_AND_DIHYDROXYEICOSATRIENOIC_ACIDS_DHET	7	-0.677794	-1.23451	0.242063	0.440763	1
REACTOME_PI_3K_CASCADE_FGFR1	14	-0.570884	-1.23298	0.202	0.442886	1
REACTOME_EPHB_MEDIATED_FORWARD_SIGNALING	38	-0.461189	-1.23208	0.168831	0.443585	1
REACTOME_MECP2_REGULATES_NEURONAL_RECEPTORS_AND_CHANNELS	17	-0.549157	-1.22954	0.219101	0.447731	1
REACTOME_RUNX2_REGULATES_OSTEOBLAST_DIFFERENTIATION	19	-0.536205	-1.22835	0.196116	0.448971	1
REACTOME_HEME_BIOSYNTHESIS	14	-0.559847	-1.22776	0.2147	0.44886	1
REACTOME_CD209_DC_SIGN_SIGNALING	20	-0.51927	-1.22755	0.190661	0.447962	1
REACTOME_PEPTIDE_HORMONE_METABOLISM	60	-0.415636	-1.22589	0.151803	0.450257	1
REACTOME_SIGNALING_BY_MODERATE_KINASE_ACTIVITY_BRAF_MUTANTS	43	-0.443289	-1.22586	0.162963	0.449005	1
REACTOME_DOWNSTREAM_SIGNALING_OF_ACTIVATED_FGFR2	21	-0.514651	-1.22531	0.194656	0.448829	1
REACTOME_INTERFERON_SIGNALING	166	-0.365628	-1.22491	0.104631	0.448424	1
REACTOME_TP53_REGULATES_TRANSCRIPTION_OF_CELL_DEATH_GENES	42	-0.446906	-1.22443	0.168207	0.448089	1
REACTOME_DISEASES_OF_IMMUNE_SYSTEM	22	-0.501411	-1.22247	0.212766	0.450795	1
REACTOME_SIGNALING_BY_TGF_BETA_RECEPTOR_COMPLEX_IN_CANCER	7	-0.656069	-1.22176	0.250482	0.450996	1
REACTOME_REGULATION_OF_TP53_ACTIVITY_THROUGH_ACETYLATION	30	-0.474397	-1.22034	0.183636	0.45262	1
REACTOME_DOWNSTREAM_SIGNALING_OF_ACTIVATED_FGFR1	23	-0.496996	-1.21879	0.194499	0.454628	1
REACTOME_BICARBONATE_TRANSPORTERS	9	-0.610217	-1.21787	0.258755	0.455469	1
REACTOME_TOLL_LIKE_RECEPTOR_10_TLR10_CASCADE	81	-0.402481	-1.21772	0.138333	0.454515	1
REACTOME_HS_GAG_DEGRADATION	22	-0.497538	-1.21758	0.186004	0.453472	1
REACTOME_PTK6_REGULATES_RHO_GTPASES_RAS_GTPASE_AND_MAP_KINASES	13	-0.570949	-1.21715	0.229602	0.453076	1
REACTOME_SIGNALING_BY_PTK6	52	-0.428507	-1.21472	0.165703	0.456975	1
REACTOME_THYROXINE_BIOSYNTHESIS	6	-0.669063	-1.21366	0.253359	0.457925	1
REACTOME_SYNTHESIS_OF_BILE_ACIDS_AND_BILE_SALTS_VIA_27_HYDROXYCHOLESTEROL	13	-0.559839	-1.21348	0.225806	0.457021	1
REACTOME_NEGATIVE_FEEDBACK_REGULATION_OF_MAPK_PATHWAY	6	-0.675032	-1.21253	0.259188	0.457724	1
REACTOME_SIGNALING_BY_NOTCH3	43	-0.44057	-1.21205	0.174242	0.457438	1
REACTOME_SIGNALING_BY_NTRK3_TRKC	15	-0.543974	-1.21009	0.228106	0.460494	1
REACTOME_ATF6_ATF6_ALPHA_ACTIVATES_CHAPERONE_GENES	10	-0.594413	-1.20655	0.253579	0.466772	1
REACTOME_MECP2_REGULATES_TRANSCRIPTION_OF_NEURONAL_LIGANDS	6	-0.676442	-1.20654	0.264078	0.465479	1
REACTOME_LIGAND_RECEPTOR_INTERACTIONS	6	-0.670349	-1.2061	0.267191	0.46511	1
REACTOME_SUMOYLATION_OF_IMMUNE_RESPONSE_PROTEINS	11	-0.58015	-1.20289	0.244186	0.470669	1
REACTOME_NEUROFASCIN_INTERACTIONS	6	-0.690005	-1.20254	0.269155	0.470121	1
REACTOME_SIGNALING_BY_FGFR3	33	-0.465069	-1.20127	0.202703	0.471414	1
REACTOME_EGFR_DOWNREGULATION	31	-0.465585	-1.20023	0.175337	0.472502	1
REACTOME_DAP12_SIGNALING	22	-0.494787	-1.19933	0.231911	0.473152	1
REACTOME_INTERLEUKIN_23_SIGNALING	8	-0.623322	-1.19878	0.260081	0.473015	1
REACTOME_SIGNALING_BY_NTRK2_TRKB	22	-0.486671	-1.19802	0.218018	0.473369	1
REACTOME_ADENYLATE_CYCLASE_INHIBITORY_PATHWAY	11	-0.573552	-1.19763	0.252336	0.472912	1
REACTOME_HS_GAG_BIOSYNTHESIS	27	-0.46984	-1.19742	0.182692	0.472094	1
REACTOME_GRB2_EVENTS_IN_ERBB2_SIGNALING	16	-0.518713	-1.19699	0.257036	0.471741	1
REACTOME_PI_3K_CASCADE_FGFR2	14	-0.550789	-1.19663	0.244231	0.471166	1
REACTOME_PLATELET_ACTIVATION_SIGNALING_AND_AGGREGATION	226	-0.347649	-1.19638	0.0830671	0.470359	1
REACTOME_CELL_SURFACE_INTERACTIONS_AT_THE_VASCULAR_WALL	104	-0.379682	-1.19591	0.126736	0.470205	1
REACTOME_VEGFR2_MEDIATED_CELL_PROLIFERATION	19	-0.517778	-1.19536	0.237624	0.470039	1
REACTOME_CD28_DEPENDENT_PI3K_AKT_SIGNALING	21	-0.507138	-1.18996	0.242481	0.480442	1
REACTOME_REGULATION_OF_MECP2_EXPRESSION_AND_ACTIVITY	29	-0.469828	-1.18944	0.212406	0.480292	1
REACTOME_LOSS_OF_FUNCTION_OF_SMAD2_3_IN_CANCER	6	-0.671655	-1.1889	0.30754	0.480146	1
REACTOME_NR1H2_AND_NR1H3_MEDIATED_SIGNALING	45	-0.433586	-1.18854	0.170093	0.479625	1
REACTOME_OVARIAN_TUMOR_DOMAIN_PROTEASES	38	-0.445017	-1.18788	0.229412	0.479791	1
REACTOME_SIGNALING_BY_NUCLEAR_RECEPTORS	220	-0.344185	-1.18386	0.10828	0.487365	1
REACTOME_SIGNAL_ATTENUATION	9	-0.600359	-1.18381	0.278455	0.486182	1
REACTOME_ERBB2_REGULATES_CELL_MOTILITY	15	-0.53899	-1.1836	0.242604	0.48532	1
REACTOME_DEGRADATION_OF_THE_EXTRACELLULAR_MATRIX	111	-0.377433	-1.18283	0.1489	0.485731	1
REACTOME_MITOCHONDRIAL_BIOGENESIS	93	-0.380613	-1.18225	0.179211	0.485725	1
REACTOME_MUSCLE_CONTRACTION	149	-0.357073	-1.18003	0.131092	0.489376	1
REACTOME_SEMA3A_PLEXIN_REPULSION_SIGNALING_BY_INHIBITING_INTEGRIN_ADHESION	14	-0.549974	-1.17987	0.270161	0.48844	1
REACTOME_REGULATION_OF_TP53_ACTIVITY	156	-0.353907	-1.17827	0.133562	0.490742	1
REACTOME_ACYL_CHAIN_REMODELLING_OF_PE	16	-0.527675	-1.17616	0.242424	0.493979	1
REACTOME_DAP12_INTERACTIONS	26	-0.468597	-1.17568	0.252727	0.493731	1
REACTOME_CARDIAC_CONDUCTION	96	-0.372376	-1.1744	0.186567	0.495185	1
REACTOME_ANTIGEN_PROCESSING_UBIQUITINATION_PROTEASOME_DEGRADATION	291	-0.329249	-1.17379	0.0872483	0.495183	1
REACTOME_SYNTHESIS_OF_BILE_ACIDS_AND_BILE_SALTS	30	-0.451947	-1.17098	0.240809	0.500127	1
REACTOME_CONSTITUTIVE_SIGNALING_BY_EGFRVIII	15	-0.530425	-1.1696	0.24466	0.502029	1
REACTOME_ARMS_MEDIATED_ACTIVATION	5	-0.682059	-1.16835	0.31	0.503373	1
REACTOME_ION_TRANSPORT_BY_P_TYPE_ATPASES	42	-0.428449	-1.16601	0.244275	0.507147	1
REACTOME_SYNTHESIS_OF_PC	26	-0.471889	-1.16428	0.239845	0.509797	1
REACTOME_INSULIN_RECEPTOR_RECYCLING	20	-0.497003	-1.16396	0.275311	0.509159	1
REACTOME_APEX1_INDEPENDENT_RESOLUTION_OF_AP_SITES_VIA_THE_SINGLE_NUCLEOTIDE_REPLACEMENT_PATHWAY	7	-0.64273	-1.16375	0.311579	0.508333	1
REACTOME_ASSEMBLY_OF_ACTIVE_LPL_AND_LIPC_LIPASE_COMPLEXES	16	-0.52001	-1.16368	0.294798	0.507177	1
REACTOME_INTRA_GOLGI_AND_RETROGRADE_GOLGI_TO_ER_TRAFFIC	193	-0.339492	-1.16312	0.137056	0.507122	1
REACTOME_SYNTHESIS_OF_PI	5	-0.681594	-1.1618	0.322382	0.508459	1
REACTOME_MET_ACTIVATES_RAS_SIGNALING	10	-0.57598	-1.16133	0.280392	0.508156	1
REACTOME_NEGATIVE_REGULATION_OF_MAPK_PATHWAY	39	-0.429116	-1.16029	0.223735	0.509228	1
REACTOME_CASPASE_MEDIATED_CLEAVAGE_OF_CYTOSKELETAL_PROTEINS	12	-0.559891	-1.1597	0.292157	0.509156	1
REACTOME_NR1H2_NR1H3_REGULATE_GENE_EXPRESSION_LINKED_TO_GLUCONEOGENESIS	5	-0.678956	-1.15969	0.320988	0.507903	1
REACTOME_ROLE_OF_SECOND_MESSENGERS_IN_NETRIN_1_SIGNALING	7	-0.630677	-1.15859	0.289883	0.508983	1
REACTOME_MAP2K_AND_MAPK_ACTIVATION	39	-0.4318	-1.15585	0.247723	0.513713	1
REACTOME_SYNTHESIS_OF_16_20_HYDROXYEICOSATETRAENOIC_ACIDS_HETE	7	-0.61335	-1.15529	0.349174	0.513668	1
REACTOME_ATF6_ATF6_ALPHA_ACTIVATES_CHAPERONES	12	-0.564365	-1.15515	0.296703	0.512691	1
REACTOME_SEMA4D_IN_SEMAPHORIN_SIGNALING	24	-0.476619	-1.15324	0.281553	0.515647	1
REACTOME_DDX58_IFIH1_MEDIATED_INDUCTION_OF_INTERFERON_ALPHA_BETA	61	-0.394676	-1.15315	0.224231	0.514563	1
REACTOME_SIGNALING_BY_PDGFRA_TRANSMEMBRANE_JUXTAMEMBRANE_AND_KINASE_DOMAIN_MUTANTS	12	-0.551852	-1.15236	0.311321	0.514971	1
REACTOME_MAPK_FAMILY_SIGNALING_CASCADES	258	-0.326852	-1.15214	0.143556	0.514225	1
REACTOME_MRNA_EDITING	7	-0.615142	-1.15056	0.315476	0.516283	1
REACTOME_NECTIN_NECL_TRANS_HETERODIMERIZATION	7	-0.617967	-1.14919	0.305051	0.517795	1
REACTOME_BASIGIN_INTERACTIONS	21	-0.491011	-1.14836	0.266174	0.518325	1
REACTOME_BILE_ACID_AND_BILE_SALT_METABOLISM	35	-0.435276	-1.14742	0.239006	0.518998	1
REACTOME_RIP_MEDIATED_NFKB_ACTIVATION_VIA_ZBP1	16	-0.51222	-1.14713	0.286853	0.51837	1
REACTOME_VEGFR2_MEDIATED_VASCULAR_PERMEABILITY	27	-0.465747	-1.14521	0.274621	0.52131	1
REACTOME_MISCELLANEOUS_SUBSTRATES	9	-0.585072	-1.14281	0.300403	0.525248	1
REACTOME_TRIGLYCERIDE_BIOSYNTHESIS	11	-0.550403	-1.13918	0.319549	0.532227	1
REACTOME_NEUREXINS_AND_NEUROLIGINS	52	-0.404367	-1.13691	0.260952	0.535917	1
REACTOME_SIGNALING_BY_NOTCH1_PEST_DOMAIN_MUTANTS_IN_CANCER	53	-0.401029	-1.13617	0.25045	0.536176	1
REACTOME_TIE2_SIGNALING	15	-0.516517	-1.1357	0.307263	0.535987	1
REACTOME_TOLL_LIKE_RECEPTOR_4_TLR4_CASCADE	117	-0.356488	-1.13388	0.216216	0.538922	1
REACTOME_RAF_ACTIVATION	29	-0.449809	-1.13341	0.269307	0.538707	1
REACTOME_P75NTR_SIGNALS_VIA_NF_KB	15	-0.517655	-1.13284	0.302734	0.538672	1
REACTOME_FCERI_MEDIATED_CA_2_MOBILIZATION	28	-0.449873	-1.13269	0.273585	0.537713	1
REACTOME_CTLA4_INHIBITORY_SIGNALING	19	-0.493354	-1.13153	0.299625	0.538949	1
REACTOME_CASPASE_ACTIVATION_VIA_EXTRINSIC_APOPTOTIC_SIGNALLING_PATHWAY	25	-0.455847	-1.1311	0.283217	0.538686	1
REACTOME_BIOSYNTHESIS_OF_MARESINS	5	-0.66137	-1.12897	0.327309	0.542091	1
REACTOME_CONSTITUTIVE_SIGNALING_BY_AKT1_E17K_IN_CANCER	25	-0.45892	-1.12615	0.276896	0.547118	1
REACTOME_SIGNALING_BY_NOTCH1	68	-0.389074	-1.12606	0.24596	0.546027	1
REACTOME_O_GLYCOSYLATION_OF_TSR_DOMAIN_CONTAINING_PROTEINS	36	-0.42103	-1.12491	0.277978	0.547251	1
REACTOME_COMPLEMENT_CASCADE	44	-0.410613	-1.12434	0.257603	0.547278	1
REACTOME_TNFR1_MEDIATED_CERAMIDE_PRODUCTION	5	-0.654072	-1.1211	0.363107	0.553411	1
REACTOME_TOLL_LIKE_RECEPTOR_CASCADES	141	-0.33944	-1.11686	0.222591	0.561865	1
REACTOME_SYNTHESIS_OF_LEUKOTRIENES_LT_AND_EOXINS_EX	15	-0.504239	-1.1161	0.341959	0.562344	1
REACTOME_RECEPTOR_MEDIATED_MITOPHAGY	10	-0.564922	-1.1142	0.335317	0.565227	1
REACTOME_ASSEMBLY_OF_THE_HIV_VIRION	16	-0.503426	-1.11397	0.333333	0.564471	1
REACTOME_RUNX2_REGULATES_BONE_DEVELOPMENT	25	-0.439435	-1.11349	0.30292	0.564226	1
REACTOME_ENDOSOMAL_SORTING_COMPLEX_REQUIRED_FOR_TRANSPORT_ESCRT	31	-0.428952	-1.11349	0.315369	0.562936	1
REACTOME_TAK1_ACTIVATES_NFKB_BY_PHOSPHORYLATION_AND_ACTIVATION_OF_IKKS_COMPLEX	30	-0.428645	-1.11152	0.295146	0.565922	1
REACTOME_EXTRACELLULAR_MATRIX_ORGANIZATION	253	-0.31779	-1.11124	0.195827	0.56525	1
REACTOME_ECM_PROTEOGLYCANS	66	-0.379214	-1.1071	0.269663	0.573216	1
REACTOME_EXTRA_NUCLEAR_ESTROGEN_SIGNALING	68	-0.371216	-1.10348	0.296763	0.580015	1
REACTOME_PROLACTIN_RECEPTOR_SIGNALING	11	-0.5419	-1.10236	0.358491	0.581171	1
REACTOME_DEX_H_BOX_HELICASES_ACTIVATE_TYPE_I_IFN_AND_INFLAMMATORY_CYTOKINES_PRODUCTION	6	-0.620401	-1.10133	0.395112	0.582289	1
REACTOME_STIMULI_SENSING_CHANNELS	89	-0.357263	-1.10075	0.265734	0.582227	1
REACTOME_MELANIN_BIOSYNTHESIS	5	-0.64491	-1.09988	0.384158	0.582905	1
REACTOME_BETA_CATENIN_PHOSPHORYLATION_CASCADE	17	-0.489155	-1.09878	0.357553	0.584041	1
REACTOME_WNT5A_DEPENDENT_INTERNALIZATION_OF_FZD2_FZD5_AND_ROR2	12	-0.515971	-1.09863	0.344894	0.583081	1
REACTOME_SEMA4D_INDUCED_CELL_MIGRATION_AND_GROWTH_CONE_COLLAPSE	20	-0.455873	-1.09714	0.343985	0.585135	1
REACTOME_EPIGENETIC_REGULATION_OF_GENE_EXPRESSION	87	-0.354359	-1.09357	0.29623	0.591941	1
REACTOME_CONDENSATION_OF_PROPHASE_CHROMOSOMES	13	-0.511947	-1.09243	0.351085	0.593273	1
REACTOME_RECYCLING_OF_BILE_ACIDS_AND_SALTS	12	-0.513082	-1.09167	0.340996	0.593657	1
REACTOME_TRANSCRIPTIONAL_REGULATION_BY_MECP2	53	-0.383497	-1.09123	0.276392	0.593346	1
REACTOME_JNK_C_JUN_KINASES_PHOSPHORYLATION_AND_ACTIVATION_MEDIATED_BY_ACTIVATED_HUMAN_TAK1	22	-0.458199	-1.09054	0.337812	0.593535	1
REACTOME_INTERLEUKIN_17_SIGNALING	67	-0.374306	-1.08938	0.322695	0.594845	1
REACTOME_ZINC_EFFLUX_AND_COMPARTMENTALIZATION_BY_THE_SLC30_FAMILY	6	-0.620566	-1.0889	0.398855	0.594637	1
REACTOME_FERTILIZATION	12	-0.517909	-1.08843	0.356998	0.594436	1
REACTOME_CLASS_B_2_SECRETIN_FAMILY_RECEPTORS	59	-0.377542	-1.0884	0.301075	0.593194	1
REACTOME_RHO_GTPASES_ACTIVATE_CIT	19	-0.465938	-1.086	0.347573	0.59718	1
REACTOME_RUNX3_REGULATES_YAP1_MEDIATED_TRANSCRIPTION	8	-0.562495	-1.08295	0.383984	0.602741	1
REACTOME_ACYL_CHAIN_REMODELLING_OF_PS	14	-0.49791	-1.07717	0.364937	0.614648	1
REACTOME_GAP_JUNCTION_DEGRADATION	12	-0.508289	-1.07656	0.353535	0.614597	1
REACTOME_SIGNALING_BY_FGFR4	34	-0.412789	-1.07616	0.357278	0.614187	1
REACTOME_CLASS_I_MHC_MEDIATED_ANTIGEN_PROCESSING_PRESENTATION	346	-0.298442	-1.07361	0.236446	0.618698	1
REACTOME_NCAM_SIGNALING_FOR_NEURITE_OUT_GROWTH	56	-0.370444	-1.07315	0.33638	0.618382	1
REACTOME_SPHINGOLIPID_DE_NOVO_BIOSYNTHESIS	36	-0.404346	-1.07129	0.333955	0.621365	1
REACTOME_BIOSYNTHESIS_OF_SPECIALIZED_PRORESOLVING_MEDIATORS_SPMS	13	-0.502173	-1.06735	0.375	0.629288	1
REACTOME_NEGATIVE_REGULATION_OF_MET_ACTIVITY	20	-0.45555	-1.06358	0.367589	0.636387	1
REACTOME_SUMOYLATION_OF_RNA_BINDING_PROTEINS	46	-0.376024	-1.0614	0.348837	0.639983	1
REACTOME_AQUAPORIN_MEDIATED_TRANSPORT	42	-0.386776	-1.06081	0.362477	0.64002	1
REACTOME_MYD88_INDEPENDENT_TLR4_CASCADE	94	-0.342614	-1.05849	0.332136	0.64393	1
REACTOME_THROMBIN_SIGNALLING_THROUGH_PROTEINASE_ACTIVATED_RECEPTORS_PARS	28	-0.415791	-1.05839	0.387405	0.642789	1
REACTOME_COPII_MEDIATED_VESICLE_TRANSPORT	65	-0.361968	-1.05734	0.349904	0.643948	1
REACTOME_ANTIGEN_ACTIVATES_B_CELL_RECEPTOR_BCR_LEADING_TO_GENERATION_OF_SECOND_MESSENGERS	25	-0.426477	-1.05465	0.361217	0.648999	1
REACTOME_ASSEMBLY_OF_COLLAGEN_FIBRILS_AND_OTHER_MULTIMERIC_STRUCTURES	53	-0.374765	-1.05358	0.382979	0.650129	1
REACTOME_SUMOYLATION_OF_DNA_DAMAGE_RESPONSE_AND_REPAIR_PROTEINS	75	-0.348595	-1.05004	0.359633	0.657264	1
REACTOME_POU5F1_OCT4_SOX2_NANOG_ACTIVATE_GENES_RELATED_TO_PROLIFERATION	10	-0.521726	-1.04817	0.413462	0.660191	1
REACTOME_ANTIVIRAL_MECHANISM_BY_IFN_STIMULATED_GENES	79	-0.347247	-1.04427	0.354204	0.668151	1
REACTOME_HDACS_DEACETYLATE_HISTONES	32	-0.40179	-1.04381	0.390057	0.667821	1
REACTOME_ACTIVATION_OF_THE_PHOTOTRANSDUCTION_CASCADE	8	-0.544806	-1.04348	0.431683	0.667166	1
REACTOME_REGULATION_OF_TP53_ACTIVITY_THROUGH_METHYLATION	19	-0.439993	-1.0425	0.417457	0.668078	1
REACTOME_NOTCH1_INTRACELLULAR_DOMAIN_REGULATES_TRANSCRIPTION	44	-0.376288	-1.04119	0.391555	0.669707	1
REACTOME_MET_RECEPTOR_RECYCLING	9	-0.52076	-1.03948	0.447818	0.672382	1
REACTOME_NOREPINEPHRINE_NEUROTRANSMITTER_RELEASE_CYCLE	18	-0.452921	-1.03914	0.403509	0.671739	1
REACTOME_PLATELET_AGGREGATION_PLUG_FORMATION	34	-0.398992	-1.03881	0.389587	0.671151	1
REACTOME_DIGESTION_AND_ABSORPTION	15	-0.468682	-1.03785	0.403226	0.672101	1
REACTOME_ACTIVATED_TAK1_MEDIATES_P38_MAPK_ACTIVATION	23	-0.433307	-1.035	0.399621	0.677414	1
REACTOME_PP2A_MEDIATED_DEPHOSPHORYLATION_OF_KEY_METABOLIC_FACTORS	7	-0.561669	-1.03429	0.478261	0.67764	1
REACTOME_CREB_PHOSPHORYLATION	7	-0.558633	-1.03103	0.444882	0.684003	1
REACTOME_CONSTITUTIVE_SIGNALING_BY_OVEREXPRESSED_ERBB2	11	-0.509786	-1.03058	0.449612	0.683705	1
REACTOME_OTHER_SEMAPHORIN_INTERACTIONS	16	-0.455283	-1.02904	0.410609	0.685776	1
REACTOME_SMALL_INTERFERING_RNA_SIRNA_BIOGENESIS	9	-0.516969	-1.02777	0.43595	0.687537	1
REACTOME_TRANSCRIPTIONAL_REGULATION_OF_PLURIPOTENT_STEM_CELLS	23	-0.419184	-1.02663	0.420949	0.688829	1
REACTOME_REGULATION_OF_PTEN_MRNA_TRANSLATION	9	-0.534703	-1.02649	0.453094	0.687724	1
REACTOME_SIGNAL_TRANSDUCTION_BY_L1	21	-0.432685	-1.02494	0.434959	0.689952	1
REACTOME_DAG_AND_IP3_SIGNALING	35	-0.388132	-1.02473	0.42037	0.68905	1
REACTOME_PTK6_PROMOTES_HIF1A_STABILIZATION	5	-0.594493	-1.02396	0.462121	0.68947	1
REACTOME_NOTCH4_ACTIVATION_AND_TRANSMISSION_OF_SIGNAL_TO_THE_NUCLEUS	11	-0.49984	-1.02152	0.450617	0.693696	1
REACTOME_INITIATION_OF_NUCLEAR_ENVELOPE_NE_REFORMATION	19	-0.44968	-1.02125	0.444882	0.692954	1
REACTOME_SIGNALING_BY_FGFR_IN_DISEASE	54	-0.357036	-1.02069	0.410072	0.692893	1
REACTOME_ANCHORING_FIBRIL_FORMATION	14	-0.47455	-1.02067	0.442	0.691532	1
REACTOME_ANTI_INFLAMMATORY_RESPONSE_FAVOURING_LEISHMANIA_PARASITE_INFECTION	93	-0.328241	-1.0194	0.39115	0.693074	1
REACTOME_ESTROGEN_BIOSYNTHESIS	6	-0.57169	-1.01861	0.478175	0.693442	1
REACTOME_TRANS_GOLGI_NETWORK_VESICLE_BUDDING	72	-0.333479	-1.01522	0.407678	0.700032	1
REACTOME_PHASE_0_RAPID_DEPOLARISATION	36	-0.378384	-1.01517	0.436742	0.698746	1
REACTOME_ACTIVATION_OF_ANTERIOR_HOX_GENES_IN_HINDBRAIN_DEVELOPMENT_DURING_EARLY_EMBRYOGENESIS	56	-0.350421	-1.0151	0.416667	0.69751	1
REACTOME_WNT5A_DEPENDENT_INTERNALIZATION_OF_FZD4	13	-0.482973	-1.01482	0.441905	0.696742	1
REACTOME_VITAMIN_B5_PANTOTHENATE_METABOLISM	17	-0.450835	-1.01381	0.449715	0.697767	1
REACTOME_FCGR3A_MEDIATED_IL10_SYNTHESIS	30	-0.39552	-1.01246	0.428302	0.699433	1
REACTOME_NEGATIVE_EPIGENETIC_REGULATION_OF_RRNA_EXPRESSION	49	-0.360493	-1.01061	0.441729	0.702478	1
REACTOME_SEMAPHORIN_INTERACTIONS	61	-0.348219	-1.0105	0.428044	0.701345	1
REACTOME_SUMOYLATION_OF_CHROMATIN_ORGANIZATION_PROTEINS	56	-0.34709	-1.00544	0.418994	0.711903	1
REACTOME_CLASS_I_PEROXISOMAL_MEMBRANE_PROTEIN_IMPORT	20	-0.432968	-1.00363	0.459203	0.714757	1
REACTOME_SIGNALING_BY_NOTCH2	28	-0.398928	-0.99847	0.47025	0.725645	1
REACTOME_PTEN_REGULATION	137	-0.305592	-0.996612	0.455674	0.728587	1
REACTOME_SIGNALING_BY_NOTCH	168	-0.296964	-0.994103	0.466437	0.732994	1
REACTOME_NUCLEAR_SIGNALING_BY_ERBB4	30	-0.379218	-0.993434	0.486188	0.733199	1
REACTOME_SYNTHESIS_OF_VERY_LONG_CHAIN_FATTY_ACYL_COAS	21	-0.426276	-0.993304	0.45951	0.732056	1
REACTOME_IRAK2_MEDIATED_ACTIVATION_OF_TAK1_COMPLEX	10	-0.488196	-0.992845	0.483748	0.731659	1
REACTOME_TRAF6_MEDIATED_INDUCTION_OF_TAK1_COMPLEX_WITHIN_TLR4_COMPLEX	16	-0.44158	-0.9923	0.473888	0.731532	1
REACTOME_PROGRAMMED_CELL_DEATH	167	-0.296793	-0.991939	0.448105	0.730994	1
REACTOME_TRAFFICKING_OF_AMPA_RECEPTORS	28	-0.390432	-0.989524	0.488462	0.735037	1
REACTOME_CLEC7A_DECTIN_1_INDUCES_NFAT_ACTIVATION	11	-0.480343	-0.986498	0.481336	0.740719	1
REACTOME_MRNA_DECAY_BY_5_TO_3_EXORIBONUCLEASE	15	-0.448056	-0.985604	0.478702	0.741566	1
REACTOME_INITIAL_TRIGGERING_OF_COMPLEMENT	16	-0.445881	-0.985525	0.463602	0.74032	1
REACTOME_P75NTR_NEGATIVELY_REGULATES_CELL_CYCLE_VIA_SC1	5	-0.579973	-0.983758	0.52621	0.742715	1
REACTOME_ACTIVATION_OF_NIMA_KINASES_NEK9_NEK6_NEK7	7	-0.528206	-0.98303	0.518518	0.743098	1
REACTOME_LOSS_OF_FUNCTION_OF_MECP2_IN_RETT_SYNDROME	12	-0.463934	-0.98261	0.503731	0.742643	1
REACTOME_BUTYROPHILIN_BTN_FAMILY_INTERACTIONS	8	-0.514596	-0.980851	0.511066	0.745289	1
REACTOME_NR1H2_NR1H3_REGULATE_GENE_EXPRESSION_TO_CONTROL_BILE_ACID_HOMEOSTASIS	8	-0.514107	-0.97888	0.497967	0.74855	1
REACTOME_REGULATION_OF_INSULIN_LIKE_GROWTH_FACTOR_IGF_TRANSPORT_AND_UPTAKE_BY_INSULIN_LIKE_GROWTH_FACTOR_BINDING_PROTEINS_IGFBPS	111	-0.304523	-0.978417	0.465969	0.748233	1
REACTOME_MTOR_SIGNALLING	40	-0.361787	-0.978162	0.476103	0.747466	1
REACTOME_GOLGI_ASSOCIATED_VESICLE_BIOGENESIS	56	-0.342018	-0.977655	0.479428	0.747191	1
REACTOME_OXIDATIVE_STRESS_INDUCED_SENESCENCE	62	-0.33171	-0.976858	0.472119	0.747643	1
REACTOME_TRANSCRIPTIONAL_REGULATION_BY_TP53	356	-0.271233	-0.972485	0.533118	0.756233	1
REACTOME_SHC1_EVENTS_IN_EGFR_SIGNALING	14	-0.443193	-0.972066	0.493724	0.755848	1
REACTOME_GALACTOSE_CATABOLISM	5	-0.569699	-0.971077	0.534521	0.756816	1
REACTOME_SHC_MEDIATED_CASCADE_FGFR3	12	-0.470248	-0.969506	0.503846	0.759239	1
REACTOME_BUDDING_AND_MATURATION_OF_HIV_VIRION	28	-0.382027	-0.968976	0.478927	0.759027	1
REACTOME_METABOLISM_OF_AMINE_DERIVED_HORMONES	10	-0.489847	-0.967321	0.514395	0.761298	1
REACTOME_RHO_GTPASES_ACTIVATE_PAKS	21	-0.415185	-0.965058	0.529197	0.765219	1
REACTOME_PHASE_I_FUNCTIONALIZATION_OF_COMPOUNDS	84	-0.315956	-0.964226	0.52518	0.765712	1
REACTOME_NEGATIVE_REGULATION_OF_FGFR3_SIGNALING	23	-0.392791	-0.961642	0.509579	0.77054	1
REACTOME_CAMK_IV_MEDIATED_PHOSPHORYLATION_OF_CREB	8	-0.510891	-0.960865	0.564356	0.770896	1
REACTOME_G_PROTEIN_MEDIATED_EVENTS	45	-0.348748	-0.959645	0.542214	0.772222	1
REACTOME_RHO_GTPASE_EFFECTORS	251	-0.273856	-0.959384	0.579365	0.771375	1
REACTOME_METABOLISM_OF_PORPHYRINS	25	-0.388016	-0.958166	0.51277	0.77271	1
REACTOME_RUNX1_REGULATES_GENES_INVOLVED_IN_MEGAKARYOCYTE_DIFFERENTIATION_AND_PLATELET_FUNCTION	33	-0.371986	-0.957706	0.51197	0.772323	1
REACTOME_INLB_MEDIATED_ENTRY_OF_LISTERIA_MONOCYTOGENES_INTO_HOST_CELL	15	-0.43156	-0.957388	0.496109	0.771678	1
REACTOME_EGFR_TRANSACTIVATION_BY_GASTRIN	8	-0.500107	-0.956391	0.551657	0.7725	1
REACTOME_GP1B_IX_V_ACTIVATION_SIGNALLING	9	-0.490484	-0.956179	0.522073	0.771582	1
REACTOME_SEROTONIN_RECEPTORS	5	-0.562534	-0.954762	0.551282	0.773564	1
REACTOME_RECOGNITION_AND_ASSOCIATION_OF_DNA_GLYCOSYLASE_WITH_SITE_CONTAINING_AN_AFFECTED_PURINE	10	-0.477163	-0.954489	0.535373	0.772809	1
REACTOME_SOS_MEDIATED_SIGNALLING	7	-0.509384	-0.953292	0.549801	0.774199	1
REACTOME_DEADENYLATION_DEPENDENT_MRNA_DECAY	56	-0.33604	-0.952625	0.529197	0.774318	1
REACTOME_MOLYBDENUM_COFACTOR_BIOSYNTHESIS	6	-0.526872	-0.952347	0.54375	0.773634	1
REACTOME_RUNX3_REGULATES_P14_ARF	9	-0.478418	-0.951754	0.534517	0.77365	1
REACTOME_PLATELET_SENSITIZATION_BY_LDL	17	-0.41609	-0.951419	0.530418	0.773014	1
REACTOME_MAPK_TARGETS_NUCLEAR_EVENTS_MEDIATED_BY_MAP_KINASES	31	-0.373927	-0.95025	0.541516	0.774308	1
REACTOME_METABOLISM_OF_INGESTED_SEMET_SEC_MESEC_INTO_H2SE	8	-0.497716	-0.949699	0.540323	0.774198	1
REACTOME_MEIOTIC_SYNAPSIS	27	-0.379766	-0.948373	0.535284	0.776028	1
REACTOME_NEUROTRANSMITTER_CLEARANCE	9	-0.47998	-0.946478	0.55666	0.779135	1
REACTOME_TRAF6_MEDIATED_IRF7_ACTIVATION	14	-0.428518	-0.945926	0.541199	0.779022	1
REACTOME_G_ALPHA_Z_SIGNALLING_EVENTS	39	-0.355007	-0.945246	0.530275	0.77919	1
REACTOME_ACETYLCHOLINE_NEUROTRANSMITTER_RELEASE_CYCLE	14	-0.434626	-0.945026	0.51992	0.77833	1
REACTOME_PHOSPHOLIPASE_C_MEDIATED_CASCADE_FGFR4	8	-0.491468	-0.944177	0.546185	0.778967	1
REACTOME_TGF_BETA_RECEPTOR_SIGNALING_IN_EMT_EPITHELIAL_TO_MESENCHYMAL_TRANSITION	15	-0.423382	-0.941304	0.535185	0.784133	1
REACTOME_METAL_ION_SLC_TRANSPORTERS	24	-0.381319	-0.941076	0.544592	0.783316	1
REACTOME_INACTIVATION_OF_CDC42_AND_RAC1	8	-0.483466	-0.94026	0.553785	0.783794	1
REACTOME_SPHINGOLIPID_METABOLISM	77	-0.312581	-0.939779	0.571174	0.783539	1
REACTOME_RUNX3_REGULATES_WNT_SIGNALING	8	-0.491427	-0.939504	0.556	0.78279	1
REACTOME_SIGNALING_BY_ERBB4	55	-0.322673	-0.939208	0.541045	0.78211	1
REACTOME_BLOOD_GROUP_SYSTEMS_BIOSYNTHESIS	15	-0.424912	-0.938942	0.538175	0.7813	1
REACTOME_FRS_MEDIATED_FGFR4_SIGNALING	15	-0.415881	-0.93876	0.529528	0.780309	1
REACTOME_REGULATION_OF_FZD_BY_UBIQUITINATION	18	-0.399608	-0.937672	0.542744	0.781472	1
REACTOME_ZBP1_DAI_MEDIATED_INDUCTION_OF_TYPE_I_IFNS	19	-0.407868	-0.9372	0.55303	0.78116	1
REACTOME_ADRENALINE_NORADRENALINE_INHIBITS_INSULIN_SECRETION	24	-0.374387	-0.936533	0.547794	0.781364	1
REACTOME_NEF_AND_SIGNAL_TRANSDUCTION	5	-0.539264	-0.936381	0.56998	0.780369	1
REACTOME_COENZYME_A_BIOSYNTHESIS	8	-0.494514	-0.935283	0.549296	0.781447	1
REACTOME_DOWNREGULATION_OF_ERBB2_SIGNALING	28	-0.378384	-0.934942	0.550459	0.780884	1
REACTOME_ERYTHROPOIETIN_ACTIVATES_PHOSPHOLIPASE_C_GAMMA_PLCG	7	-0.509531	-0.931276	0.582809	0.787689	1
REACTOME_SIGNALLING_TO_RAS	18	-0.402899	-0.928919	0.558763	0.791686	1
REACTOME_CARGO_TRAFFICKING_TO_THE_PERICILIARY_MEMBRANE	49	-0.330702	-0.926161	0.561338	0.796602	1
REACTOME_NEGATIVE_REGULATORS_OF_DDX58_IFIH1_SIGNALING	34	-0.354338	-0.926098	0.552347	0.795382	1
REACTOME_SIGNALING_BY_WNT	240	-0.264189	-0.925343	0.683502	0.795687	1
REACTOME_VITAMIN_B2_RIBOFLAVIN_METABOLISM	5	-0.550082	-0.924966	0.615385	0.795228	1
REACTOME_ION_HOMEOSTASIS	40	-0.337462	-0.924732	0.587242	0.794379	1
REACTOME_REGULATION_OF_SIGNALING_BY_CBL	20	-0.395877	-0.92466	0.564815	0.793199	1
REACTOME_TYSND1_CLEAVES_PEROXISOMAL_PROTEINS	7	-0.501825	-0.923587	0.57874	0.794173	1
REACTOME_CREATION_OF_C4_AND_C2_ACTIVATORS	9	-0.457115	-0.922772	0.564	0.794712	1
REACTOME_GPVI_MEDIATED_ACTIVATION_CASCADE	31	-0.354515	-0.922424	0.566731	0.794102	1
REACTOME_TRANSFERRIN_ENDOCYTOSIS_AND_RECYCLING	26	-0.374524	-0.921117	0.567718	0.795699	1
REACTOME_SYNTHESIS_OF_BILE_ACIDS_AND_BILE_SALTS_VIA_7ALPHA_HYDROXYCHOLESTEROL	22	-0.380955	-0.918752	0.575701	0.79962	1
REACTOME_ACTIVATED_NTRK2_SIGNALS_THROUGH_FRS2_AND_FRS3	10	-0.453257	-0.917356	0.567468	0.801302	1
REACTOME_PRE_NOTCH_PROCESSING_IN_THE_ENDOPLASMIC_RETICULUM	6	-0.514881	-0.916954	0.596639	0.800772	1
REACTOME_ADP_SIGNALLING_THROUGH_P2Y_PURINOCEPTOR_1	21	-0.382289	-0.915091	0.603053	0.80353	1
REACTOME_KERATAN_SULFATE_DEGRADATION	12	-0.433152	-0.913159	0.569416	0.806428	1
REACTOME_SLC_TRANSPORTER_DISORDERS	87	-0.296915	-0.913079	0.642593	0.805222	1
REACTOME_CONJUGATION_OF_BENZOATE_WITH_GLYCINE	5	-0.538121	-0.91295	0.617261	0.804164	1
REACTOME_THE_NLRP3_INFLAMMASOME	13	-0.429009	-0.912489	0.581854	0.803871	1
REACTOME_SIGNALING_BY_EGFR_IN_CANCER	25	-0.367994	-0.911746	0.576046	0.804195	1
REACTOME_PHASE_2_PLATEAU_PHASE	17	-0.407699	-0.911583	0.598826	0.80323	1
REACTOME_SYNTHESIS_OF_PA	31	-0.35497	-0.911583	0.589789	0.801893	1
REACTOME_GASTRIN_CREB_SIGNALLING_PATHWAY_VIA_PKC_AND_MAPK	15	-0.42359	-0.911271	0.59375	0.801251	1
REACTOME_UREA_CYCLE	9	-0.464495	-0.911124	0.573146	0.80023	1
REACTOME_MITOTIC_PROPHASE	81	-0.298032	-0.911063	0.634921	0.799024	1
REACTOME_P75NTR_RECRUITS_SIGNALLING_COMPLEXES	12	-0.433349	-0.909023	0.59309	0.80211	1
REACTOME_LINOLEIC_ACID_LA_METABOLISM	8	-0.472624	-0.907794	0.587426	0.803439	1
REACTOME_PLASMA_LIPOPROTEIN_REMODELING	29	-0.358943	-0.907022	0.605714	0.80385	1
REACTOME_DSCAM_INTERACTIONS	11	-0.433458	-0.905581	0.603884	0.805703	1
REACTOME_COMPETING_ENDOGENOUS_RNAS_CERNAS_REGULATE_PTEN_TRANSLATION	8	-0.471019	-0.902435	0.594	0.811201	1
REACTOME_TRP_CHANNELS	23	-0.370408	-0.902128	0.604167	0.8106	1
REACTOME_DEFECTS_IN_BIOTIN_BTN_METABOLISM	8	-0.461348	-0.900855	0.592827	0.81203	1
REACTOME_OPIOID_SIGNALLING	74	-0.295536	-0.900463	0.670841	0.811518	1
REACTOME_ADP_SIGNALLING_THROUGH_P2Y_PURINOCEPTOR_12	17	-0.395955	-0.898237	0.592803	0.815029	1
REACTOME_P38MAPK_EVENTS	13	-0.412668	-0.896635	0.601869	0.817045	1
REACTOME_CYCLIN_A_B1_B2_ASSOCIATED_EVENTS_DURING_G2_M_TRANSITION	24	-0.373321	-0.895931	0.611429	0.817143	1
REACTOME_CELLULAR_SENESCENCE	123	-0.277498	-0.892701	0.722719	0.822841	1
REACTOME_SIGNAL_REGULATORY_PROTEIN_FAMILY_INTERACTIONS	11	-0.436451	-0.892645	0.619048	0.821634	1
REACTOME_SIGNALING_BY_FGFR1	40	-0.339564	-0.892517	0.608133	0.820571	1
REACTOME_NONCANONICAL_ACTIVATION_OF_NOTCH3	8	-0.470821	-0.891815	0.591716	0.820772	1
REACTOME_DEFECTIVE_B4GALT7_CAUSES_EDS_PROGEROID_TYPE	18	-0.387697	-0.890768	0.625243	0.821628	1
REACTOME_DISEASES_OF_PROGRAMMED_CELL_DEATH	22	-0.376736	-0.890134	0.622222	0.821627	1
REACTOME_ER_TO_GOLGI_ANTEROGRADE_TRANSPORT	145	-0.26488	-0.886213	0.73752	0.828513	1
REACTOME_RESPONSE_TO_ELEVATED_PLATELET_CYTOSOLIC_CA2	115	-0.272769	-0.886049	0.726027	0.827536	1
REACTOME_THE_CANONICAL_RETINOID_CYCLE_IN_RODS_TWILIGHT_VISION	15	-0.399904	-0.885732	0.606786	0.82693	1
REACTOME_ALPHA_LINOLENIC_OMEGA3_AND_LINOLEIC_OMEGA6_ACID_METABOLISM	13	-0.414318	-0.881401	0.618774	0.834765	1
REACTOME_SEROTONIN_NEUROTRANSMITTER_RELEASE_CYCLE	17	-0.379934	-0.880675	0.608445	0.834999	1
REACTOME_RAB_GERANYLGERANYLATION	59	-0.304571	-0.87987	0.676573	0.835275	1
REACTOME_NF_KB_IS_ACTIVATED_AND_SIGNALS_SURVIVAL	12	-0.428014	-0.879811	0.620123	0.834061	1
REACTOME_N_GLYCAN_ANTENNAE_ELONGATION_IN_THE_MEDIAL_TRANS_GOLGI	22	-0.364703	-0.878617	0.662083	0.835224	1
REACTOME_ACTIVATION_OF_THE_TFAP2_AP_2_FAMILY_OF_TRANSCRIPTION_FACTORS	10	-0.438551	-0.875379	0.613333	0.840961	1
REACTOME_TRANSPORT_TO_THE_GOLGI_AND_SUBSEQUENT_MODIFICATION	172	-0.26	-0.873714	0.798978	0.843156	1
REACTOME_MITOCHONDRIAL_CALCIUM_ION_TRANSPORT	23	-0.359561	-0.868692	0.679463	0.852229	1
REACTOME_TELOMERE_C_STRAND_SYNTHESIS_INITIATION	7	-0.466784	-0.866271	0.637827	0.856067	1
REACTOME_REMOVAL_OF_AMINOTERMINAL_PROPEPTIDES_FROM_GAMMA_CARBOXYLATED_PROTEINS	10	-0.423113	-0.864596	0.634952	0.858121	1
REACTOME_TIGHT_JUNCTION_INTERACTIONS	23	-0.366987	-0.863803	0.662768	0.858389	1
REACTOME_G_PROTEIN_ACTIVATION	20	-0.369252	-0.862242	0.652259	0.860166	1
REACTOME_ERYTHROPOIETIN_ACTIVATES_RAS	14	-0.39507	-0.861722	0.647173	0.859849	1
REACTOME_REGULATION_OF_COMMISSURAL_AXON_PATHFINDING_BY_SLIT_AND_ROBO	10	-0.426166	-0.861227	0.641473	0.859513	1
REACTOME_PRESYNAPTIC_DEPOLARIZATION_AND_CALCIUM_CHANNEL_OPENING	10	-0.425299	-0.856607	0.664804	0.86745	1
REACTOME_DEFECTIVE_ST3GAL3_CAUSES_MCT12_AND_EIEE15	7	-0.466857	-0.854747	0.670956	0.869859	1
REACTOME_RELEASE_OF_HH_NP_FROM_THE_SECRETING_CELL	7	-0.457181	-0.852971	0.649402	0.872024	1
REACTOME_ACTIVATED_NTRK2_SIGNALS_THROUGH_FYN	7	-0.459981	-0.852655	0.654397	0.871321	1
REACTOME_INFLAMMASOMES	17	-0.374984	-0.851708	0.669159	0.871851	1
REACTOME_FRS_MEDIATED_FGFR1_SIGNALING	16	-0.380049	-0.851529	0.676357	0.870856	1
REACTOME_REGULATION_OF_RUNX1_EXPRESSION_AND_ACTIVITY	17	-0.368509	-0.850186	0.690249	0.872226	1
REACTOME_FATTY_ACIDS_BOUND_TO_GPR40_FFAR1_REGULATE_INSULIN_SECRETION	6	-0.476304	-0.849677	0.675676	0.871847	1
REACTOME_ACTIVATED_NOTCH1_TRANSMITS_SIGNAL_TO_THE_NUCLEUS	29	-0.334528	-0.849335	0.676417	0.871241	1
REACTOME_CELLULAR_HEXOSE_TRANSPORT	18	-0.365221	-0.848653	0.651119	0.871233	1
REACTOME_CONSTITUTIVE_SIGNALING_BY_LIGAND_RESPONSIVE_EGFR_CANCER_VARIANTS	19	-0.373394	-0.847048	0.680723	0.873069	1
REACTOME_KERATAN_SULFATE_KERATIN_METABOLISM	31	-0.332417	-0.84702	0.701658	0.871775	1
REACTOME_NEF_MEDIATED_CD4_DOWN_REGULATION	8	-0.438076	-0.845883	0.660853	0.87265	1
REACTOME_OAS_ANTIVIRAL_RESPONSE	8	-0.437507	-0.845523	0.682008	0.872043	1
REACTOME_SIGNALING_BY_NOTCH1_HD_DOMAIN_MUTANTS_IN_CANCER	14	-0.385241	-0.842344	0.681909	0.876873	1
REACTOME_PENTOSE_PHOSPHATE_PATHWAY	12	-0.389633	-0.839149	0.692157	0.881584	1
REACTOME_INTEGRATION_OF_ENERGY_METABOLISM	92	-0.269726	-0.838999	0.806071	0.880508	1
REACTOME_TICAM1_TRAF6_DEPENDENT_INDUCTION_OF_TAK1_COMPLEX	11	-0.405305	-0.8351	0.690058	0.886661	1
REACTOME_DEFECTIVE_LFNG_CAUSES_SCDO3	5	-0.478627	-0.83464	0.689024	0.886236	1
REACTOME_DOPAMINE_NEUROTRANSMITTER_RELEASE_CYCLE	22	-0.343626	-0.832955	0.715128	0.888038	1
REACTOME_SENSING_OF_DNA_DOUBLE_STRAND_BREAKS	6	-0.464689	-0.829532	0.68	0.893208	1
REACTOME_FATTY_ACYL_COA_BIOSYNTHESIS	34	-0.315795	-0.829252	0.747292	0.892381	1
REACTOME_DISEASES_OF_BASE_EXCISION_REPAIR	5	-0.473224	-0.828468	0.689655	0.892553	1
REACTOME_L1CAM_INTERACTIONS	112	-0.258721	-0.827057	0.838333	0.893831	1
REACTOME_PEROXISOMAL_LIPID_METABOLISM	29	-0.324088	-0.826113	0.74954	0.894171	1
REACTOME_ASSEMBLY_OF_THE_ORC_COMPLEX_AT_THE_ORIGIN_OF_REPLICATION	6	-0.457463	-0.82472	0.703846	0.895181	1
REACTOME_CARGO_CONCENTRATION_IN_THE_ER	30	-0.322543	-0.821106	0.769231	0.900393	1
REACTOME_GLUTAMATE_NEUROTRANSMITTER_RELEASE_CYCLE	23	-0.337628	-0.819304	0.694981	0.902289	1
REACTOME_CREB1_PHOSPHORYLATION_THROUGH_NMDA_RECEPTOR_MEDIATED_ACTIVATION_OF_RAS_SIGNALING	25	-0.328461	-0.818796	0.728938	0.901795	1
REACTOME_ADENYLATE_CYCLASE_ACTIVATING_PATHWAY	8	-0.427363	-0.81728	0.705521	0.903182	1
REACTOME_DEPOLYMERISATION_OF_THE_NUCLEAR_LAMINA	15	-0.362791	-0.816498	0.719231	0.903181	1
REACTOME_NA_CL_DEPENDENT_NEUROTRANSMITTER_TRANSPORTERS	16	-0.360818	-0.815096	0.70872	0.904341	1
REACTOME_DISEASES_ASSOCIATED_WITH_O_GLYCOSYLATION_OF_PROTEINS	63	-0.275511	-0.810267	0.82971	0.91134	1
REACTOME_TRAF3_DEPENDENT_IRF_ACTIVATION_PATHWAY	12	-0.383179	-0.810003	0.731161	0.910404	1
REACTOME_PROCESSING_OF_SMDT1	16	-0.36438	-0.809983	0.72447	0.909102	1
REACTOME_FRS_MEDIATED_FGFR2_SIGNALING	16	-0.364645	-0.807072	0.745098	0.912851	1
REACTOME_NEF_MEDIATED_CD8_DOWN_REGULATION	7	-0.443838	-0.801535	0.723866	0.920856	1
REACTOME_INTERFERON_ALPHA_BETA_SIGNALING	51	-0.282413	-0.799463	0.803371	0.922817	1
REACTOME_AMYLOID_FIBER_FORMATION	44	-0.290442	-0.79594	0.793419	0.927288	1
REACTOME_LECTIN_PATHWAY_OF_COMPLEMENT_ACTIVATION	5	-0.464418	-0.790312	0.74477	0.935117	1
REACTOME_LONG_TERM_POTENTIATION	20	-0.335832	-0.78968	0.781746	0.934767	1
REACTOME_AMINO_ACID_CONJUGATION	8	-0.406107	-0.789492	0.725296	0.933674	1
REACTOME_ACTIVATION_OF_NOXA_AND_TRANSLOCATION_TO_MITOCHONDRIA	5	-0.46205	-0.787157	0.749511	0.936083	1
REACTOME_N_GLYCAN_ANTENNAE_ELONGATION	15	-0.355006	-0.786055	0.746063	0.936462	1
REACTOME_STRIATED_MUSCLE_CONTRACTION	27	-0.314192	-0.780649	0.804511	0.943539	1
REACTOME_P75NTR_REGULATES_AXONOGENESIS	6	-0.440494	-0.779385	0.755144	0.944068	1
REACTOME_RETROGRADE_NEUROTROPHIN_SIGNALLING	12	-0.371249	-0.776491	0.762808	0.947212	1
REACTOME_GAMMA_CARBOXYLATION_TRANSPORT_AND_AMINO_TERMINAL_CLEAVAGE_OF_PROTEINS	11	-0.385008	-0.776038	0.742747	0.946503	1
REACTOME_ROS_AND_RNS_PRODUCTION_IN_PHAGOCYTES	29	-0.301345	-0.775575	0.805769	0.945852	1
REACTOME_REACTIONS_SPECIFIC_TO_THE_COMPLEX_N_GLYCAN_SYNTHESIS_PATHWAY	6	-0.438295	-0.77538	0.767152	0.944728	1
REACTOME_HCMV_LATE_EVENTS	53	-0.273318	-0.775003	0.882143	0.943956	1
REACTOME_REGULATION_OF_INSULIN_SECRETION	65	-0.259739	-0.770515	0.877095	0.949198	1
REACTOME_BETA_OXIDATION_OF_PRISTANOYL_COA	9	-0.39116	-0.768172	0.774648	0.951321	1
REACTOME_NOTCH3_ACTIVATION_AND_TRANSMISSION_OF_SIGNAL_TO_THE_NUCLEUS	24	-0.310916	-0.766306	0.814745	0.952687	1
REACTOME_PURINERGIC_SIGNALING_IN_LEISHMANIASIS_INFECTION	19	-0.331817	-0.765413	0.791128	0.952682	1
REACTOME_TRNA_PROCESSING_IN_THE_MITOCHONDRION	6	-0.423835	-0.764714	0.758333	0.95238	1
REACTOME_SMOOTH_MUSCLE_CONTRACTION	32	-0.292304	-0.761976	0.836397	0.954899	1
REACTOME_ANTIGEN_PRESENTATION_FOLDING_ASSEMBLY_AND_PEPTIDE_LOADING_OF_CLASS_I_MHC	25	-0.304998	-0.759667	0.822344	0.9567	1
REACTOME_NUCLEAR_ENVELOPE_BREAKDOWN	52	-0.268593	-0.758869	0.874766	0.956401	1
REACTOME_SHC1_EVENTS_IN_ERBB4_SIGNALING	14	-0.341541	-0.754618	0.790224	0.960805	1
REACTOME_METABOLISM_OF_WATER_SOLUBLE_VITAMINS_AND_COFACTORS	111	-0.236179	-0.752893	0.961938	0.961759	1
REACTOME_INLA_MEDIATED_ENTRY_OF_LISTERIA_MONOCYTOGENES_INTO_HOST_CELLS	9	-0.389595	-0.751696	0.764228	0.961986	1
REACTOME_COLLAGEN_DEGRADATION	52	-0.259855	-0.750086	0.910369	0.962689	1
REACTOME_UNBLOCKING_OF_NMDA_RECEPTORS_GLUTAMATE_BINDING_AND_ACTIVATION	18	-0.329549	-0.749928	0.836127	0.961532	1
REACTOME_SYNTHESIS_SECRETION_AND_INACTIVATION_OF_GLUCOSE_DEPENDENT_INSULINOTROPIC_POLYPEPTIDE_GIP	10	-0.38154	-0.749372	0.762678	0.96093	1
REACTOME_HEPARAN_SULFATE_HEPARIN_HS_GAG_METABOLISM	49	-0.267659	-0.748809	0.888258	0.960295	1
REACTOME_CARNITINE_METABOLISM	13	-0.35233	-0.74762	0.799197	0.960455	1
REACTOME_INTEGRIN_CELL_SURFACE_INTERACTIONS	77	-0.2449	-0.744474	0.936207	0.963112	1
REACTOME_DEGRADATION_OF_CYSTEINE_AND_HOMOCYSTEINE	14	-0.339459	-0.741416	0.835294	0.965578	1
REACTOME_CYTOSOLIC_IRON_SULFUR_CLUSTER_ASSEMBLY	13	-0.352836	-0.737921	0.818533	0.968598	1
REACTOME_CLEC7A_INFLAMMASOME_PATHWAY	5	-0.43224	-0.736333	0.783898	0.969152	1
REACTOME_TERMINAL_PATHWAY_OF_COMPLEMENT	8	-0.386393	-0.736115	0.797688	0.968041	1
REACTOME_ACTIVATION_OF_SMO	16	-0.323982	-0.736041	0.831144	0.966768	1
REACTOME_METABOLIC_DISORDERS_OF_BIOLOGICAL_OXIDATION_ENZYMES	27	-0.295824	-0.735487	0.854281	0.966064	1
REACTOME_CA_DEPENDENT_EVENTS	31	-0.287195	-0.734509	0.865643	0.965929	1
REACTOME_MUCOPOLYSACCHARIDOSES	11	-0.361652	-0.732741	0.806513	0.966751	1
REACTOME_CA2_ACTIVATED_K_CHANNELS	8	-0.385834	-0.730762	0.811395	0.967842	1
REACTOME_ZINC_TRANSPORTERS	15	-0.334996	-0.730165	0.838828	0.967209	1
REACTOME_G2_M_DNA_REPLICATION_CHECKPOINT	5	-0.43005	-0.726926	0.798434	0.969691	1
REACTOME_NADE_MODULATES_DEATH_SIGNALLING	5	-0.424197	-0.725805	0.810379	0.969653	1
REACTOME_PEXOPHAGY	11	-0.355824	-0.723617	0.830645	0.970806	1
REACTOME_COLLAGEN_FORMATION	79	-0.234905	-0.723451	0.970228	0.969674	1
REACTOME_CHREBP_ACTIVATES_METABOLIC_GENE_EXPRESSION	8	-0.380254	-0.723284	0.81262	0.968534	1
REACTOME_CALCINEURIN_ACTIVATES_NFAT	9	-0.37819	-0.722461	0.818725	0.968082	1
REACTOME_HDL_ASSEMBLY	7	-0.386049	-0.721506	0.795497	0.967788	1
REACTOME_NOTCH2_ACTIVATION_AND_TRANSMISSION_OF_SIGNAL_TO_THE_NUCLEUS	21	-0.302749	-0.721392	0.880228	0.966578	1
REACTOME_AMPK_INHIBITS_CHREBP_TRANSCRIPTIONAL_ACTIVATION_ACTIVITY	7	-0.394611	-0.721235	0.825046	0.965415	1
REACTOME_RHO_GTPASES_ACTIVATE_NADPH_OXIDASES	20	-0.301289	-0.720293	0.859345	0.96513	1
REACTOME_PRC2_METHYLATES_HISTONES_AND_DNA	13	-0.340876	-0.71833	0.838	0.965896	1
REACTOME_PHOSPHORYLATION_OF_EMI1	6	-0.403961	-0.716126	0.802495	0.966887	1
REACTOME_LRR_FLII_INTERACTING_PROTEIN_1_LRRFIP1_ACTIVATES_TYPE_I_IFN_PRODUCTION	5	-0.413923	-0.715482	0.794231	0.966226	1
REACTOME_INSULIN_PROCESSING	25	-0.292722	-0.714676	0.891144	0.965762	1
REACTOME_GABA_B_RECEPTOR_ACTIVATION	33	-0.273728	-0.712034	0.93053	0.9672	1
REACTOME_NEGATIVE_REGULATION_OF_NMDA_RECEPTOR_MEDIATED_NEURONAL_TRANSMISSION	17	-0.312258	-0.708218	0.869903	0.969747	1
REACTOME_DNA_DOUBLE_STRAND_BREAK_RESPONSE	42	-0.261449	-0.707951	0.910092	0.9687	1
REACTOME_ABC_TRANSPORTERS_IN_LIPID_HOMEOSTASIS	18	-0.303871	-0.706149	0.885375	0.969214	1
REACTOME_ESTROGEN_STIMULATED_SIGNALING_THROUGH_PRKCZ	6	-0.402075	-0.705435	0.837302	0.968611	1
REACTOME_INCRETIN_SYNTHESIS_SECRETION_AND_INACTIVATION	14	-0.317325	-0.703939	0.860465	0.968698	1
REACTOME_DEFECTIVE_CHST3_CAUSES_SEDCJD	6	-0.395013	-0.701448	0.821429	0.96977	1
REACTOME_NONHOMOLOGOUS_END_JOINING_NHEJ	35	-0.263499	-0.699508	0.925573	0.970331	1
REACTOME_RHO_GTPASES_ACTIVATE_KTN1	11	-0.334642	-0.695619	0.838835	0.972621	1
REACTOME_PHOSPHOLIPASE_C_MEDIATED_CASCADE_FGFR2	9	-0.340599	-0.694832	0.853414	0.972016	1
REACTOME_CGMP_EFFECTS	15	-0.314689	-0.692933	0.88117	0.972436	1
REACTOME_REGULATION_OF_TP53_EXPRESSION_AND_DEGRADATION	36	-0.255122	-0.688867	0.924752	0.974722	1
REACTOME_RAS_ACTIVATION_UPON_CA2_INFLUX_THROUGH_NMDA_RECEPTOR	17	-0.303036	-0.686159	0.890335	0.975811	1
REACTOME_PLASMA_LIPOPROTEIN_ASSEMBLY_REMODELING_AND_CLEARANCE	65	-0.23236	-0.679332	0.979705	0.98015	1
REACTOME_NITRIC_OXIDE_STIMULATES_GUANYLATE_CYCLASE	20	-0.291626	-0.676898	0.913556	0.980736	1
REACTOME_KERATAN_SULFATE_BIOSYNTHESIS	25	-0.275161	-0.674316	0.930057	0.981509	1
REACTOME_NS1_MEDIATED_EFFECTS_ON_HOST_PATHWAYS	40	-0.252014	-0.674176	0.940035	0.9803	1
REACTOME_SYNTHESIS_OF_PYROPHOSPHATES_IN_THE_CYTOSOL	7	-0.361397	-0.662335	0.855102	0.987989	1
REACTOME_PROPIONYL_COA_CATABOLISM	5	-0.385599	-0.660421	0.87767	0.988091	1
REACTOME_NR1H2_NR1H3_REGULATE_GENE_EXPRESSION_LINKED_TO_LIPOGENESIS	9	-0.333605	-0.656992	0.872211	0.989185	1
REACTOME_UBIQUINOL_BIOSYNTHESIS	8	-0.349125	-0.653459	0.883333	0.990281	1
REACTOME_VITAMIN_C_ASCORBATE_METABOLISM	8	-0.337985	-0.653363	0.865643	0.989029	1
REACTOME_FIBRONECTIN_MATRIX_FORMATION	5	-0.379841	-0.652265	0.847358	0.988461	1
REACTOME_BIOTIN_TRANSPORT_AND_METABOLISM	11	-0.312296	-0.645573	0.90625	0.991586	1
REACTOME_FORMATION_OF_SENESCENCE_ASSOCIATED_HETEROCHROMATIN_FOCI_SAHF	11	-0.31466	-0.644876	0.897839	0.990746	1
REACTOME_NUCLEAR_PORE_COMPLEX_NPC_DISASSEMBLY	35	-0.246422	-0.644787	0.975143	0.989488	1
REACTOME_ARACHIDONIC_ACID_METABOLISM	47	-0.231385	-0.644088	0.976147	0.988611	1
REACTOME_POLO_LIKE_KINASE_MEDIATED_EVENTS	16	-0.285759	-0.636084	0.930909	0.992236	1
REACTOME_TERMINATION_OF_O_GLYCAN_BIOSYNTHESIS	22	-0.265322	-0.633681	0.939096	0.992333	1
REACTOME_NICOTINAMIDE_SALVAGING	17	-0.274198	-0.626358	0.944444	0.995112	1
REACTOME_REGULATION_OF_GLUCOKINASE_BY_GLUCOKINASE_REGULATORY_PROTEIN	30	-0.239398	-0.616114	0.977273	0.9992	1
REACTOME_RMTS_METHYLATE_HISTONE_ARGININES	29	-0.238755	-0.609178	0.975332	1	1
REACTOME_IMMUNOREGULATORY_INTERACTIONS_BETWEEN_A_LYMPHOID_AND_A_NON_LYMPHOID_CELL	75	-0.201214	-0.607951	0.996441	1	1
REACTOME_O_LINKED_GLYCOSYLATION	101	-0.190655	-0.601109	1	1	1
REACTOME_CD28_DEPENDENT_VAV1_PATHWAY	11	-0.282381	-0.600656	0.93083	1	1
REACTOME_SUMO_IS_PROTEOLYTICALLY_PROCESSED	6	-0.333953	-0.593871	0.938247	1	1
REACTOME_FREE_FATTY_ACIDS_REGULATE_INSULIN_SECRETION	9	-0.303369	-0.592932	0.939516	1	1
REACTOME_TNFS_BIND_THEIR_PHYSIOLOGICAL_RECEPTORS	15	-0.268074	-0.591827	0.95941	1	1
REACTOME_COLLAGEN_CHAIN_TRIMERIZATION	40	-0.217879	-0.589571	0.985455	1	1
REACTOME_GOLGI_CISTERNAE_PERICENTRIOLAR_STACK_REORGANIZATION	14	-0.266369	-0.586668	0.947674	1	1
REACTOME_VLDLR_INTERNALISATION_AND_DEGRADATION	12	-0.28413	-0.580999	0.946869	1	1
REACTOME_PROCESSING_AND_ACTIVATION_OF_SUMO	10	-0.285522	-0.579614	0.941296	1	1
REACTOME_LGI_ADAM_INTERACTIONS	10	-0.293596	-0.574702	0.939806	1	1
REACTOME_SYNAPTIC_ADHESION_LIKE_MOLECULES	19	-0.24642	-0.569653	0.979675	1	1
REACTOME_RHO_GTPASES_ACTIVATE_ROCKS	19	-0.239797	-0.560956	0.981096	1	1
REACTOME_INTERLEUKIN_18_SIGNALING	5	-0.332416	-0.556149	0.95	1	1
REACTOME_CONDENSATION_OF_PROMETAPHASE_CHROMOSOMES	11	-0.265996	-0.549497	0.962818	1	1
REACTOME_ABACAVIR_METABOLISM	5	-0.307646	-0.528455	0.944898	1	1
REACTOME_ACETYLCHOLINE_REGULATES_INSULIN_SECRETION	9	-0.27201	-0.526073	0.966601	1	1
REACTOME_COMMON_PATHWAY_OF_FIBRIN_CLOT_FORMATION	15	-0.234911	-0.523851	0.983456	1	1
REACTOME_SUMOYLATION_OF_UBIQUITINYLATION_PROTEINS	38	-0.189464	-0.515494	1	1	1
REACTOME_CROSSLINKING_OF_COLLAGEN_FIBRILS	17	-0.226299	-0.511893	0.990253	1	1
REACTOME_NR1H2_NR1H3_REGULATE_GENE_EXPRESSION_LINKED_TO_TRIGLYCERIDE_LIPOLYSIS_IN_ADIPOSE	5	-0.298638	-0.50701	0.955645	1	1
REACTOME_RSK_ACTIVATION	7	-0.267022	-0.498972	0.980276	1	1
REACTOME_LYSOSPHINGOLIPID_AND_LPA_RECEPTORS	12	-0.232812	-0.48118	0.984283	1	1
REACTOME_NR1H2_NR1H3_REGULATE_GENE_EXPRESSION_TO_LIMIT_CHOLESTEROL_UPTAKE	5	-0.276422	-0.475915	0.97379	1	1
REACTOME_ATTACHMENT_OF_GPI_ANCHOR_TO_UPAR	7	-0.248999	-0.474834	0.978304	1	1
REACTOME_SUMOYLATION_OF_SUMOYLATION_PROTEINS	34	-0.176502	-0.472287	1	1	1
REACTOME_CLASS_C_3_METABOTROPIC_GLUTAMATE_PHEROMONE_RECEPTORS	12	-0.22802	-0.467664	0.988417	1	1
REACTOME_NEGATIVE_REGULATION_OF_ACTIVITY_OF_TFAP2_AP_2_FAMILY_TRANSCRIPTION_FACTORS	9	-0.235257	-0.462079	0.980769	1	1
REACTOME_CHOLINE_CATABOLISM	6	-0.256356	-0.459093	0.984645	1	1
REACTOME_RUNX1_REGULATES_TRANSCRIPTION_OF_GENES_INVOLVED_IN_DIFFERENTIATION_OF_KERATINOCYTES	8	-0.236812	-0.451542	0.994094	1	1
REACTOME_ABACAVIR_TRANSMEMBRANE_TRANSPORT	5	-0.261886	-0.447422	0.997959	1	1
REACTOME_MRNA_EDITING_C_TO_U_CONVERSION	5	-0.258918	-0.445261	0.991984	0.998929	1
REACTOME_METABOLISM_OF_ANGIOTENSINOGEN_TO_ANGIOTENSINS	11	-0.210002	-0.430439	0.99434	0.998814	1
REACTOME_ACYL_CHAIN_REMODELLING_OF_PC	18	-0.142015	-0.326902	1	0.999978	1
